# Supplementary material for: A metabolomics investigation into the effects of HIV protease inhibitors on HPV16 E6 expressing cervical carcinoma cells
Source: Royal Society of Chemistry journal article supplement (doi:10.1039/c3mb70423h), 2014-01-06
Supplement: c3mb70423h.xlsx [file c3mb70423h.xlsx]

## Sheet: exclude
	Peak No.	RT	m/z	Molecular Formula	Adduct	ppm error	Metabolite	MSI Identification: Level 1 - RT and MS/MS match to reference standard; Level 2 MS/MS match but no standard; Level 3 - MS match to MMDB; Level 4 - unidentified	Mix QC	Mix QC	Mix QC	Mix QC	Mix QC	Mix QC	Mix QC	Mix QC	Mix QC	Mix QC	Mix QC	indinavir QC	indinavir QC	indinavir QC	indinavir QC	indinavir QC	indinavir QC	indinavir QC	indinavir QC	indinavir QC	lopinavir QC	lopinavir QC	lopinavir QC	lopinavir QC	lopinavir QC	lopinavir QC	lopinavir QC	lopinavir QC	lopinavir QC	EI1-0	EI1-0	EI1-0	EI2-0	EI3-0	EI4-0	EI5-0	EI-0	EI-0	EI-0	EI1-0.05	EI2-0.05
									pooled all the samples	pooled all the samples	pooled all the samples	pooled all the samples	pooled all the samples	pooled all the samples	pooled all the samples	pooled all the samples	Average	Standard Deviation	Standard Error	pooled indinavir exposed samples	pooled indinavir exposed samples	pooled indinavir exposed samples	pooled indinavir exposed samples	pooled indinavir exposed samples	pooled indinavir exposed samples	Average	Standard Deviation	Standard Error	pooled lopinavir exposed samples	pooled lopinavir exposed samples	pooled lopinavir exposed samples	pooled lopinavir exposed samples	pooled lopinavir exposed samples	pooled lopinavir exposed samples	Average	Standard Deviation	Standard Error	E6 indinavir control	E6 indinavir control	E6 indinavir control	E6 indinavir control	E6 indinavir control	E6 indinavir control	E6 indinavir control	Average	Standard Deviation	Standard Error	E6 exposed to 0.05mM indinavir	E6 exposed to 0.05mM indinavir
	1	0.251	68.9844				Unidentified	4	1.6289	0.9413	1.0568	1.4451	1.7906	1.392	1.7338	2.1555	1.518	0.397504	0.150242	1.2797	1.6033	1.1984	2.0517	2.632	1.6279	1.73217	0.534586	0.218244	1.4636	1.6305	1.595	1.6081	1.3308	1.6731	1.55018	0.12849	0.0524557	2.8956	2.2684	1.2686	3.0092	3.0214	2.3188	1.4344	2.31663	0.729222	0.27562	2.0454	1.6096
	2	0.2548	182.964	C3H8O2S;	KCl;	0.218622	Monothioglycerol	3	4.2084	4.679	3.8625	3.0186	4.1194	4.8417	0	0	3.0912	1.98573	0.750536	6.1031	5.5758	6.5151	0	7.1347	0	4.22145	3.3095	1.3511	4.5441	4.2776	3.4419	0	0	0	2.04393	2.26837	0.926056	7.0539	9.8517	7.1762	11.3902	11.7227	0	0	6.7421	4.95443	1.8726	5.3524	9.2922
	3	0.255	110.01				Unidentified	4	2.5994	2.3546	1.955	1.8873	3.0908	0	0	0	1.48589	1.28592	0.486031	2.4312	3.1158	0	0	0	0	0.9245	1.4485	0.591347	2.7322	3.0316	0	0	0	0	0.960633	1.49122	0.608786	4.6189	4.0173	3.6367	4.3117	5.0719	0	0	3.09379	2.16074	0.816684	3.2797	3.2513
	4	0.2551	158.966				Unmatched Adduct	4	8.0368	6.649	9.257	8.6774	9.1906	14.8824	15.1108	19.3013	11.3882	4.45768	1.68484	7.5097	8.9755	12.1633	10.0342	11.707	15.2616	10.9419	2.72792	1.11367	10.9113	8.7687	11.2783	18.7382	22.8534	29.6701	17.0367	8.18989	3.34351	5.7498	10.9898	11.2256	8.211	5.2227	10.433	10.1067	8.84837	2.49947	0.944713	5.1949	8.7896
	5	0.2552	90.9781				Salt Peak - Na, K, Cl, HCOOH complex	4	9.2818	9.9146	9.9379	11.5516	12.8724	16.0716	17.2179	20.2878	13.392	4.03456	1.52492	10.5139	9.4961	15.871	13.8801	14.7229	19.8	14.0473	3.74439	1.52864	9.9696	12.2243	15.3661	19.4042	21.7974	25.6729	17.4058	5.9654	2.43537	8.8727	14.0944	13.4933	9.418	8.7932	17.0086	12.355	12.005	3.12406	1.18079	6.5568	10.8815
	6	0.2552	112.113				Unidentified	4	6.9193	6.6678	6.5433	8.0502	8.2599	8.5885	11.6367	13.2427	8.73855	2.44449	0.923932	6.6314	9.2062	8.5869	11.0681	11.7882	11.348	9.77147	1.99081	0.812746	6.1898	6.6992	8.8086	10.0159	14.5062	13.2955	9.9192	3.40469	1.38996	9.8674	9.9568	11.2256	8.0386	9.1476	11.503	13.1132	10.4075	1.6775	0.634036	8.0463	8.1657
	7	0.2552	308.22				Unidentified	4	9.3228	9.4481	8.2175	10.8887	10.5341	10.925	11.3744	13.5531	10.533	1.60856	0.607979	7.2809	8.6625	9.8884	11.518	9.9254	8.93	9.36753	1.43175	0.58451	11.8014	14.5162	14.9164	15.1015	20.675	15.3559	15.3944	2.89418	1.18154	14.3677	14.919	14.3721	12.252	12.7887	12.6431	9.8754	13.0311	1.72838	0.653264	6.7882	11.3543
	8	0.2554	226.954				Unmatched Adduct	4	9.8052	7.9975	11.5289	11.5363	11.2019	17.0767	23.9386	23.4653	14.5688	6.19766	2.3425	11.8325	9.0758	16.4273	9.9433	16.3679	23.2608	14.4846	5.31516	2.16991	12.3662	12.8807	16.1501	21.4244	19.4868	31.631	18.9899	7.14467	2.9168	8.5571	15.3655	13.4379	11.117	9.4949	17.4129	10.1067	12.2131	3.28808	1.24278	7.2036	10.9619
	9	0.2555	362.929				Unidentified	4	2.8754	2.8886	3.5661	4.8171	3.921	8.1589	11.5219	12.2637	6.25159	3.87241	1.46363	4.9265	2.952	6.8444	3.5634	7.745	9.8367	5.978	2.64027	1.07789	4.2665	6.7135	4.8155	11.9567	10.4622	15.8229	9.00622	4.52937	1.84911	3.0512	4.6089	6.5716	4.146	3.9061	6.8145	4.2889	4.7696	1.40078	0.529445	2.5733	4.312
	10	0.2555	430.916				Unmatched Adduct	4	2.5994	2.8698	4.2033	3.1849	3.2938	7.756	12.8532	8.2343	5.62434	3.65966	1.38322	4.7586	2.7337	6.274	2.5988	6.7315	9.3834	5.41333	2.59886	1.06098	4.0459	5.6203	5.237	11.4007	10.307	16.0406	8.77525	4.62308	1.88736	3.1735	6.6834	6.5516	3.2626	2.4516	5.1175	3.4414	4.38309	1.72575	0.652272	1.7581	4.8376
	11	0.2562	702.864				Unidentified	4	1.6346	1.7037	2.379	1.8117	2.0464	4.1137	7.3906	5.1493	3.27862	2.09652	0.792412	2.2593	1.0699	3.2757	1.6197	3.6848	4.2917	2.70018	1.25326	0.51164	2.8031	3.9142	3.1621	5.8477	7.7947	8.1562	5.27967	2.34113	0.955763	1.4153	3.5771	2.5642	1.9435	1.5394	2.9371	1.3321	2.18696	0.860461	0.325224	0.9761	2.4864
	12	0.2563	129.139				Unmatched Adduct	4	10.3717	9.5049	9.0434	12.6458	12.7906	14.9811	16.2938	13.5306	12.3952	2.59332	0.980183	10.6177	11.2206	17.5549	16.7556	16.505	11.4991	14.0255	3.22246	1.31556	12.159	13.6165	14.0283	13.4083	16.0582	13.731	13.8336	1.26725	0.517352	14.8118	19.2808	14.6804	13.0747	15.6957	17.6857	17.5665	16.1137	2.15143	0.813164	11.9796	11.0565
	13	0.2566	566.893				Unidentified	4	1.1092	0.5753	1.9631	1.372	1.481	2.9241	3.3599	4.4193	2.15049	1.30184	0.49205	2.6079	1.2799	3.1159	1.2958	3.6848	3.7495	2.6223	1.114	0.454788	1.7528	2.8055	3.495	5.1168	5.4548	6.0649	4.11497	1.68997	0.689926	1.3986	2.0067	2.9995	1.3651	1.0263	1.7005	1.4431	1.70569	0.646195	0.244239	1.0043	2.2182
	14	0.2566	906.833				Unidentified	4	0.3153	0.2694	1.3855	0.899	0.6715	1.1073	2.6527	2.5621	1.23285	0.927258	0.35047	1.7454	0	0	1.0742	1.5792	0	0.733133	0.832982	0.340063	1.4692	2.3787	0.1679	3.2147	3.5731	2.4769	2.21342	1.23984	0.506164	0	1.4547	1.1489	1.3318	0.057	0.1546	1.0054	0.736057	0.639705	0.241786	0.2017	1.0869
	15	0.2568	203.225				Unidentified	4	5.0425	3.6802	4.2136	5.9779	9.0332	8.6223	6.6528	6.5964	6.22736	1.92484	0.727521	6.0016	6.5229	7.6341	7.0671	6.3727	3.9957	6.26568	1.2502	0.510392	5.6876	8.4177	7.8531	5.1168	4.3283	0	5.23392	3.0143	1.23058	10.2727	12.2573	11.3268	6.1052	9.2643	6.0289	9.0793	9.19064	2.40391	0.908594	6.6449	6.5565
	16	0.2568	272.947	C9H8Cl2O3;C4H6O4S2;C7H8O2S;	K;Na_HCOONa;NaClx2;	1.86849	DP; Succimer; Benzylsulfinic Acid	3	5.2159	4.8701	2.433	5.0757	6.127	3.8977	8.571	8.5567	5.59339	2.12902	0.804695	2.9913	5.625	3.7557	8.691	10.3309	4.809	6.03382	2.88581	1.17813	3.9905	5.2244	3.6098	5.9939	5.1331	6.0649	5.00277	1.01406	0.41399	6.4188	4.4628	3.8942	4.8099	7.6114	7.8982	5.2249	5.76003	1.56985	0.593347	4.9043	4.2827
	17	0.2568	634.878				Unidentified	4	0.7718	0.7237	1.955	1.6983	1.2351	2.564	4.6235	4.4193	2.24884	1.52943	0.578069	2.2141	0.8581	1.9974	0.4319	3.0268	2.7814	1.88495	1.03867	0.424036	1.5262	2.2841	3.0749	4.6782	3.8043	7.3197	3.78123	2.05676	0.839669	0.7935	1.838	2.9568	1.6962	0.1839	1.0837	0.7771	1.33274	0.913449	0.345251	0.9611	1.7825
	18	0.2569	408.921				Unidentified	4	3.1514	2.675	1.9953	2.4644	3.5871	2.9697	5.9239	5.8397	3.57581	1.4991	0.566606	2.2641	2.7567	2.2371	3.9953	5.0008	3.1078	3.22697	1.08435	0.442686	1.6262	4.3555	1.595	5.4092	2.8665	3.7644	3.26947	1.52771	0.623683	3.6183	2.9664	2.5372	3.6491	5.0374	7.1842	3.9964	4.14129	1.55738	0.588633	2.3375	2.5134
	19	0.2569	838.841				Unidentified	4	0.8649	1.2469	1.6036	1.5287	1.8653	3.0326	4.5763	4.5771	2.41193	1.47554	0.557703	2.5604	1.1657	2.9485	0.8639	2.5004	3.1793	2.20303	0.958571	0.391335	1.8692	4.0882	2.814	5.263	5.4683	6.0649	4.26127	1.64682	0.67231	0.799	2.7776	2.3209	1.3121	1.0997	2.4734	0.6106	1.62761	0.877271	0.331577	0.5452	1.3717
	20	0.257	974.821	C63H104O6;	NH3;	4.63675	Unidentified	4	0.4982	0.4048	0	0.8128	0.4823	0.7787	2.4055	2.1001	0.9353	0.854422	0.322941	0.9591	0.3113	1.3576	0.5859	2.2113	0.9312	1.0594	0.667255	0.272406	0	1.4234	2.2177	3.5214	1.7422	0	1.48412	1.35382	0.552695	0.8023	1.6126	0.1691	0.9775	0.6365	1.3098	0	0.786829	0.579551	0.21905	0.218	1.0742
	21	0.2573	770.851				Unidentified	4	1.1777	0.6014	1.7999	1.7251	1.5863	2.7918	5.0817	5.3662	2.51626	1.78253	0.673734	2.6558	1.3793	3.1758	1.4685	2.5004	4.454	2.60563	1.14474	0.467337	2.0824	4.0095	3.1461	4.532	4.3726	5.0953	3.87298	1.08914	0.444641	1.4349	2.7616	2.5375	2.2252	0.9285	3.4009	0.8881	2.02524	0.964494	0.364544	1.1925	1.6861
	22	0.2576	612.882				Unidentified	4	1.0811	1.3663	0.787	1.0705	1.7347	1.5776	3.4677	4.8927	1.9972	1.43188	0.541198	1.5715	1.3324	1.4381	2.0517	3.5532	2.5158	2.07712	0.847408	0.345953	1.131	2.4035	2.0849	3.8017	2.8517	2.0913	2.39402	0.891464	0.363939	1.8693	2.0067	2.4527	1.7138	2.8079	4.483	0.9991	2.33321	1.10654	0.418232	0.9447	1.7825
	23	0.2576	748.859				Unidentified	4	1.0811	0.5753	0.583	0.9183	1.5108	1.0208	3.0342	3.9458	1.58366	1.23747	0.467719	1.7323	1.0155	1.4776	1.9437	3.948	0	1.68618	1.30543	0.532941	0.9144	2.564	0.7555	2.6315	1.1407	2.5096	1.75262	0.902784	0.36856	2.55	2.7137	1.5373	1.4775	2.3726	2.0096	1.1101	1.96726	0.608592	0.230026	0.671	1.7772
	24	0.2578	470.271	C25H34F2O5;C25H46ClN;C21H39NO6;	NH3;KCl;HCOONa;	2.16896	Tafluprost; Cetalkonium chloride; Myriocin; Sphingofungin F	3	1.1892	1.1505	1.3179	0.9634	1.3989	0.928	0	0	0.868488	0.558926	0.211254	0.6856	0.7482	0.7191	0.6479	1.316	0	0.686133	0.41807	0.170676	1.572	1.5433	1.1753	1.9005	2.2814	2.7187	1.8652	0.560085	0.228654	0	0.9597	0.7612	0.9192	0.6272	0	0.222	0.498471	0.418076	0.158018	0.3355	0.9153
	25	0.2579	680.868				Unidentified	4	1.0811	0.9413	0.3699	0.9289	1.8775	1.2163	3.0342	2.8278	1.53463	0.95776	0.361999	1.187	0.5879	1.5693	1.8357	2.3688	1.6279	1.52943	0.602224	0.245857	0.9486	3.0662	0.8542	2.6315	3.0418	3.5101	2.34207	1.15044	0.469665	2.0141	1.7854	1.589	1.6221	2.0908	2.9371	1.1101	1.87837	0.567561	0.214518	1.0484	1.7785
	26	0.258	322.891	C8HCl4F3N2;C5H2BrClN4;C6H4Cl2N2O2;	H;Na_HCOONa;NaClx2;	3.00411	Tetrachloro-trifluoromethylbenzimidazole; Bromo-Chloro-Purine; Dichloro-nitroaniline	3	7.2479	6.8175	5.7789	6.2771	7.9545	5.0508	8.634	6.9449	6.8382	1.15155	0.435244	2.7049	5.9565	6.2896	8.9737	6.7023	4.4951	5.85368	2.11735	0.864404	4.2823	7.0754	6.5927	7.4173	7.0343	5.5265	6.32142	1.19508	0.487891	5.563	4.3389	5.1824	0	5.7765	5.7251	7.6786	4.89493	2.38095	0.899916	4.0201	2.6118
	27	0.2581	186.915				Unidentified	4	4.4211	3.7227	4.4294	5.2631	4.5401	6.1077	11.0793	12.8052	6.54608	3.4342	1.29801	4.4162	4.4802	5.3105	5.9644	9.6369	11.1936	6.83363	2.87492	1.17368	5.3087	7.2909	6.4372	11.1151	15.9833	21.1345	11.2116	6.23303	2.54462	5.0478	4.9082	6.6027	4.7871	4.9541	9.2678	5.1115	5.81131	1.64549	0.621935	2.6743	4.1369
	28	0.2582	365.279				Unidentified	4	1.946	2.6216	2.1245	3.175	3.548	2.7841	3.4677	3.6301	2.91213	0.64941	0.245454	2.1045	2.2981	2.9561	2.1952	3.1584	3.1078	2.63668	0.487633	0.199075	3.3203	4.4185	3.5195	4.8244	7.7947	4.6009	4.74638	1.61034	0.657418	2.5065	3.6644	2.5372	0	2.7416	2.6838	3.1083	2.46311	1.15902	0.438067	1.6774	2.2182
	29	0.2582	498.903				Unidentified	4	1.0271	1.0411	1.5831	1.1942	1.2845	1.6586	2.0228	3.2943	1.63821	0.750833	0.283788	1.3711	0.9086	2.5652	1.4122	1.9361	2.5158	1.78483	0.669923	0.273495	1.9814	2.9686	2.2559	3.9472	1.9012	5.4375	3.08197	1.38549	0.565622	1.8508	2.4429	1.8606	0.9663	1.0263	2.5706	1.4431	1.73723	0.633359	0.239387	0.8231	1.4934
	30	0.2592	254.903				Unidentified	4	6.9485	6.232	4.1854	6.5464	7.8651	7.59	9.3087	9.8461	7.31528	1.79093	0.676906	3.3708	6.0549	4.872	8.2604	6.6148	4.5733	5.62437	1.7242	0.703902	4.4543	8.9156	6.8658	10.1652	8.3655	8.2459	7.83538	1.9706	0.804493	6.2248	4.641	4.4988	3.8836	6.2597	5.8743	6.9253	5.4725	1.12708	0.425995	4.5168	3.7925
	31	0.2593	146.163				Unidentified	4	2.2163	2.3546	2.2721	4.0347	4.9084	4.1072	2.3118	3.0382	3.15541	1.0543	0.39849	2.8512	3.6512	4.4131	3.6714	4.0796	0	3.11108	1.61154	0.657909	3.6433	5.556	3.8654	2.7777	2.2814	0	3.02063	1.85791	0.758488	5.9199	5.7992	4.1533	4.146	5.9627	3.2463	5.1115	4.90556	1.07109	0.404834	4.1691	3.3898
	32	0.2598	526.851				Unidentified	4	3.9251	3.679	3.9236	4.2161	4.9479	5.3629	2.4563	3.1597	3.95883	0.92526	0.349716	2.1511	3.305	4.0051	5.077	3.5532	4.7929	3.81405	1.06605	0.435211	3.5477	2.4103	4.9505	2.7777	5.5133	8.028	4.53792	2.09322	0.854555	2.6241	3.5771	2.9524	1.7843	2.524	2.0126	3.6634	2.73399	0.718891	0.271715	2.7212	1.8307
	33	0.2599	242.928	C6H5IO;C7H4O3S;	Na;KCl;	0.246987	Iodophenol; Tioxolone	3	2.3244	2.0919	3.0731	3.5029	2.9194	5.7658	6.6326	5.2084	3.93981	1.69884	0.6421	3.2713	2.5154	5.3921	3.4554	5.264	6.9653	4.47725	1.67294	0.682976	2.9388	2.0372	3.9511	5.8477	7.1056	5.7052	4.5976	1.93932	0.791724	2.6176	5.77	4.8041	3.2074	2.7416	5.22	4.8848	4.17793	1.28789	0.486776	2.6819	3.2789
	34	0.2599	594.838				Unidentified	4	2.3152	3.5687	3.2931	3.3316	3.9858	4.1623	1.4449	1.5783	2.95999	1.05138	0.397383	1.8282	1.8657	2.9425	3.4056	2.1979	3.2558	2.58262	0.705849	0.288162	3.5652	2.2989	4.3221	1.9005	4.7529	5.621	3.74343	1.4418	0.588614	1.598	2.8792	3.6367	1.1354	1.6592	0.6183	4.2056	2.24749	1.34301	0.507611	1.9301	1.4772
	35	0.2607	730.813				Unidentified	4	2.3037	1.5652	1.7908	3.1595	2.7904	3.477	0	1.7433	2.10374	1.09906	0.415406	1.6177	2.0647	3.3175	1.9356	0	0	1.48925	1.29036	0.526786	2.8977	0.9397	4.4024	0	0	0	1.3733	1.86253	0.760375	0.5905	2.2595	2.0298	1.5221	0.263	0	2.3861	1.293	0.995875	0.376405	1.9515	1.5791
	36	0.2608	106.952				Salt Peak - Na, K, Cl, HCOOH complex	4	2.0541	1.8304	1.8494	2.847	2.4623	2.7841	0	0	1.72841	1.13454	0.428815	2.0111	2.2447	2.8319	3.4554	0	0	1.75718	1.45028	0.592072	2.4406	1.5433	3.3023	0	0	0	1.21437	1.4419	0.588653	1.4153	4.4628	3.4314	2.6514	1.3367	0	3.1324	2.34714	1.51433	0.572364	2.4999	1.9485
	37	0.261	662.826				Unidentified	4	1.741	1.7246	2.2516	2.8578	2.7517	4.0835	0	1.1048	2.06438	1.23151	0.465467	1.4626	2.4379	3.0779	2.4037	0	0	1.56368	1.3163	0.537375	1.8326	1.5033	2.9832	0	0	0	1.05318	1.25401	0.511945	1.643	1.604	2.4043	0.7314	1.1103	0	1.8854	1.33977	0.796917	0.301206	1.3787	1.3266
	38	0.2613	232.91				Unidentified	4	1.6757	1.8304	1.1625	1.7127	2.5194	1.856	2.7351	3.6301	2.14024	0.779071	0.294461	1.4168	2.7337	2.0773	3.0499	2.632	0	1.98495	1.13002	0.46133	1.6804	1.6668	1.2592	2.1826	0	4.2008	1.83163	1.37613	0.561805	2.3407	2.0939	1.6926	1.4058	3.2661	2.9371	1.5542	2.18434	0.708812	0.267906	1.7194	1.2526
	39	0.2613	458.866				Unidentified	4	2.4338	2.2487	1.7437	2.0461	3.7194	3.0838	1.5893	1.1048	2.2462	0.839553	0.317321	1.3711	2.6246	2.1572	2.7854	1.8424	0	1.79678	1.02022	0.416504	2.6521	2.5597	2.7398	2.3391	0	0	1.71512	1.3352	0.545094	2.2672	1.6577	1.6915	1.0412	1.8815	1.6098	2.2216	1.76721	0.416156	0.157292	1.7212	0.7708
	40	0.2615	424.84	C2H3BrHg;	NaClx2;	2.02431	Vinylmercuric bromide	3	0	0.2092	0.4756	0	0	0	0	0	0.0856	0.173757	0.0656741	0	0	0.1598	0	0	0	0.0266333	0.0652381	0.0266333	2.1216	1.7494	1.9042	0.6238	0	1.0457	1.24078	0.828604	0.338276	0	0	0	0.1746	0	0	0.222	0.0566571	0.0977232	0.0369359	0	0
	41	0.2618	396.846	C6H7Cl5O;	NaCl_HCOONa;	4.20819	beta-2,3,4,5,6-Pentachlorocyclohexanol	3	1.892	1.6735	1.201	2.1409	2.3502	1.2992	3.7566	4.0095	2.29036	1.05827	0.399988	1.234	1.5006	0.8788	0.9718	2.5739	1.7874	1.49108	0.627857	0.256322	0.8131	2.8587	1.5111	4.3858	1.8731	3.5553	2.49952	1.34277	0.548183	2.0006	1.4399	1.184	1.6221	1.7674	3.3242	1.8872	1.88934	0.690048	0.260813	1.0065	1.1999
	42	0.2618	464.826				Unidentified	4	1.5136	2.3004	1.1096	2.0339	2.4698	1.7632	2.8897	3.3144	2.17433	0.724438	0.273812	1.4129	1.6568	1.2783	3.5634	2.1056	1.9022	1.98653	0.830322	0.338977	1.0299	2.8288	1.5111	4.6137	2.4484	0	2.07198	1.60427	0.654941	2.2649	0.5235	2.1985	1.7135	2.2235	4.5888	1.6652	2.16827	1.22729	0.463872	2.0166	1.6465
	43	0.2621	516.821				Unidentified	4	1.4225	1.5815	0.8312	0.6244	1.6925	2.0417	4.1783	3.9301	2.03777	1.32677	0.501471	1.0866	1.5499	0.6863	2.4517	1.9389	1.5865	1.54998	0.620702	0.253401	0.7324	3.1157	1.8058	4.2168	2.7449	3.4104	2.671	1.23662	0.504849	3.2245	2.4512	0.6766	1.315	2.4636	2.4734	1.8872	2.07021	0.850572	0.321486	1.2365	1.5592
	44	0.2622	584.806				Unidentified	4	1.487	1.2916	0	1.2511	2.1929	1.392	3.75	3.8668	1.90392	1.32052	0.499108	1.02	2.3921	0.9365	2.3704	3.5662	1.6234	1.98477	0.997576	0.407259	1.0299	3.3115	1.8948	2.4354	2.7833	2.0774	2.25538	0.786129	0.320936	2.3852	0	0.9605	0.3244	2.5348	0.8482	1.8605	1.27337	0.997728	0.377106	1.8334	0.5975
	45	0.2625	390.879	C14H9Cl5;C14H8Cl4;C8HCl4F3N2;C6H12Br2O4;	K;KCl;HCOONa;HCOOK;	2.94209	Trichloro-bis(chlorophenyl)ethane; Dichloro-bis(chlorophenyl)ethylene; Tetrachloro-trifluoromethylbenzimidazole; Mitobronitol	3	1.9701	1.3181	0.9511	1.9788	1.8249	1.4699	1.1559	0.8922	1.44512	0.439939	0.166281	0.9598	2.4086	1.4903	1.9437	1.7108	0	1.41887	0.844899	0.344929	1.5399	2.1428	1.5548	1.7543	0	0	1.1653	0.928473	0.379048	1.5786	0.5235	0.9587	0.731	0	1.855	1.8394	1.06946	0.711541	0.268937	1.3618	0.6653
	46	0.2625	798.802	C20H17I3O10;	H;	0.6009	Triiodothyroacetate-glucuronoside;	3	1.6636	1.82	1.3797	2.6558	1.5814	4.0928	0.289	0	1.68529	1.29011	0.487614	1.3837	1.099	2.0488	0.9433	0	0	0.912467	0.801779	0.327325	2.3289	1.113	3.5854	0	0	0	1.17122	1.50247	0.613383	0.8544	2.6687	1.9393	1.5257	0.5616	0.6183	0.111	1.18271	0.8999	0.34013	0.9963	0.9502
	47	0.2626	216.927				Unidentified	4	1.4595	0.9936	1.1625	1.5884	1.343	2.1345	2.881	4.7349	2.03717	1.24616	0.471003	2.1978	1.4792	2.6365	2.5916	3.4216	3.6998	2.67108	0.809151	0.330335	1.0841	2.3459	3.4419	3.2163	3.8023	2.9279	2.80307	0.975374	0.398195	2.3953	2.7919	3.9806	2.2136	2.2806	2.7826	1.6756	2.5886	0.721463	0.272687	1.3	1.638
	48	0.2626	366.837				Unidentified	4	2.032	1.9254	0	0	0	2.0417	3.4677	3.1566	1.57793	1.418	0.535953	0	2.0918	2.4768	1.8221	2.3688	3.5332	2.04878	1.16102	0.473985	0	2.5373	2.8542	2.9239	2.8517	3.9735	2.52343	1.33027	0.543082	2.4521	2.6281	2.8755	0	2.9163	3.6029	2.6643	2.44846	1.14075	0.431161	0	1.6861
	49	0.2626	600.796				Unidentified	4	1.3909	1.6507	1.6908	2.0114	1.7997	2.0417	2.1249	1.1677	1.73473	0.332944	0.125841	0.6399	1.7869	1.5979	2.4736	2.3601	1.4676	1.721	0.667434	0.272479	0.9757	2.9315	1.8157	1.2875	0	0	1.1684	1.12331	0.45859	2.5905	0.9597	1.0995	0.7096	2.2783	1.5459	2.5501	1.67623	0.791562	0.299182	1.5442	0.4956
	50	0.2626	668.779				Unidentified	4	1.8688	1.4054	1.1008	1.8298	1.8956	1.856	1.8053	1.9295	1.7114	0.296765	0.112167	0.1167	1.5178	1.7423	2.7218	2.4736	0	1.4287	1.15176	0.470203	1.3566	2.0828	1.699	1.4966	0.7605	0.7424	1.35632	0.528541	0.215776	1.5321	0.9204	1.6796	0.9618	1.1704	1.3704	1.8854	1.36001	0.36416	0.13764	1.3098	0.5299
	51	0.2628	532.814				Unidentified	4	2.0028	2.0737	1.5109	1.8235	2.6066	2.2249	2.1631	1.1048	1.93879	0.46173	0.174518	0.777	1.3195	2.1572	2.7765	2.1153	0	1.52425	1.02389	0.418001	1.2601	2.4387	1.6152	3.4074	2.0318	2.6727	2.23765	0.772454	0.315353	1.8667	1.1121	0.9517	0.7766	2.4309	2.7826	3.1083	1.86127	0.939284	0.355016	1.8208	0.8722
	52	0.263	246.872				Unidentified	4	3.7587	0	0	0	0	4.011	5.635	6.6255	2.50378	2.82123	1.06632	0	3.6792	3.8815	4.5352	4.606	6.5119	3.86897	2.1437	0.875162	3.3263	4.0325	4.6577	5.5554	7.7947	8.7836	5.6917	2.16417	0.88352	3.6183	4.73	3.2138	2.4896	3.3821	5.5651	4.5445	3.93477	1.05483	0.39869	0	0
	53	0.2633	652.796				Unidentified	4	1.1889	0.9175	0.4793	0.706	1.9227	0.7424	1.285	0	0.905225	0.576585	0.217929	0.2432	1.1172	0.2397	1.622	2.3529	0	0.929167	0.932915	0.380861	0.7397	1.7227	0.1679	1.1428	0	0	0.62885	0.70375	0.287305	0.1089	0.349	0.5804	0	1.8503	2.0962	1.5542	0.934143	0.875154	0.330777	0.7091	0
	54	0.2636	300.897				Unidentified	4	2.5442	1.8789	2.1546	2.4882	3.2051	3.8977	2.2623	1.894	2.54062	0.693688	0.26219	1.5083	1.9121	2.7164	2.4836	3.1584	0	1.96313	1.1252	0.459359	2.1683	2.3363	3.274	0	0	0	1.29643	1.46932	0.599846	1.9597	2.4131	3.4676	1.982	2.6834	2.0096	3.3303	2.54939	0.639075	0.241548	1.5567	2.3889
	55	0.2638	866.792	C20H17I3O10;	HCOONa;	1.84589	Triiodothyroacetate-glucuronoside;	3	1.1055	1.1333	1.0419	1.5232	1.4078	1.699	0	0	0.988838	0.650088	0.24571	0.4533	1.3965	1.5655	0	0	0	0.569217	0.729717	0.297906	1.2959	0	2.2126	0	0	0	0.58475	0.951142	0.388302	0	0.9292	0.8966	0.4575	0.5669	0	0	0.407171	0.415826	0.157167	0.8397	0.3422
	56	0.2651	306.873	C2HBrF4;	NaCl_HCOONa;	2.24849	Teflurane	3	6.6173	5.9981	5.9664	6.7937	7.1109	7.8743	9.0428	8.4213	7.2281	1.12216	0.424138	4.7745	6.7368	5.8933	6.8514	5.4295	6.9653	6.10847	0.890806	0.36367	7.0077	7.4514	8.3065	10.0546	10.947	12.5448	9.38533	2.16454	0.883668	5.403	7.0435	6.6751	4.8265	6.1516	8.1833	6.2384	6.3602	1.09671	0.414516	4.3148	4.8132
	57	0.2661	266.882				Unidentified	4	2.2704	2.3546	2.8107	2.5738	2.4623	2.7841	4.1901	4.4193	2.98316	0.839265	0.317212	0	1.8706	2.0773	3.171	3.29	2.3678	2.12945	1.19103	0.486237	4.1073	3.3546	4.1142	7.2704	5.7035	4.0782	4.77137	1.44738	0.590892	2.1177	2.3355	2.4259	0	1.9955	2.9371	2.4978	2.04421	0.950447	0.359235	1.679	0
	58	0.2672	312.866	C4H3IN2O2;	KCl;	2.01365	Iodouracil	3	1.7839	1.8827	2.9725	2.5191	3.2958	4.8417	6.2129	7.2673	3.84699	2.04353	0.772382	3.9137	2.8429	4.821	3.4554	5.264	6.3636	4.44343	1.29007	0.526671	3.5477	4.9859	4.6369	6.5822	8.7538	7.3916	5.98302	1.93687	0.790726	4.1284	7.5811	4.4582	3.6774	3.4211	6.6472	2.8633	4.68239	1.75737	0.664224	1.9861	2.8867
	59	0.2673	244.875				Unidentified	4	8.5331	8.5959	8.8916	10.6566	10.8756	13.5627	18.8285	17.4929	12.1796	4.0589	1.53412	7.2324	10.4671	11.9633	12.6447	15.2712	15.4773	12.176	3.10172	1.26627	9.4996	11.4208	13.7857	16.033	20.5254	25.318	16.0971	5.92244	2.41782	9.5731	10.5444	12.4534	8.7283	11.5106	16.1121	12.1881	11.5871	2.4121	0.911687	8.2585	7.2136
	60	0.2675	164.932				Unidentified	4	30.5439	27.7033	30.3539	37.3403	38.0672	46.7731	53.3865	52.6984	39.6083	10.2091	3.85867	27.9077	32.3638	38.8448	42.895	46.2039	51.0545	39.8783	8.65855	3.53484	37.1346	47.3113	46.1417	56.1063	75.6802	67.2653	54.9399	14.3949	5.8767	36.2294	41.1335	39.8727	33.6016	39.2796	49.3517	41.3717	40.12	4.93646	1.86581	24.9636	29.8967
	61	0.2679	426.831				Unidentified	4	3.0796	2.5891	3.0236	3.1994	3.2138	2.7865	2.7452	4.5262	3.14542	0.601404	0.227309	2.1519	2.6421	2.6365	3.4554	2.2301	3.1078	2.70397	0.503078	0.205381	4.42	3.4277	3.6939	5.1168	4.6304	3.5553	4.14068	0.681363	0.278165	2.4662	3.3154	3.7039	0	2.5793	3.7101	3.4414	2.74519	1.31031	0.49525	2.8762	2.4136
	62	0.2695	448.819	C13H6Cl6O2;C12H4Cl6;	Na_Na;Na_HCOONa;	1.69333	Hexachlorophene; Hexachlorobiphenyl;	3	2.655	2.3947	2.4306	3.1882	3.152	3.3409	0	0	2.14518	1.37001	0.517816	2.8918	2.8158	2.7164	2.3756	0	4.1437	2.49055	1.36138	0.55578	4.0189	3.2214	4.5512	0	5.5133	5.7156	3.83673	2.09685	0.856034	3.4033	2.4445	3.6955	2.8657	2.7653	0	3.7744	2.70696	1.29271	0.4886	2.3633	3.7405
	63	0.2697	302.834				Unidentified	4	5.8985	5.4149	5.8499	6.498	8.119	10.9365	12.1121	13.7143	8.5679	3.24252	1.22556	5.8273	6.9216	8.5222	9.1965	10.6288	12.4241	8.92008	2.40798	0.983053	7.8822	7.9996	8.8442	11.9746	14.7723	16.2501	11.2872	3.62269	1.47896	7.5724	9.3972	7.5313	6.3869	7.2861	12.4132	7.8322	8.34561	2.00561	0.758049	6.101	5.467
	64	0.2697	386.826	C10H5Cl7O;	H;	4.16209	Heptachlor epoxide	3	2.5768	2.83	3.0265	3.2054	2.9562	3.3607	4.6852	5.2919	3.49159	0.966758	0.3654	2.1978	2.7537	2.7164	3.1315	3.1865	0	2.33098	1.19593	0.488235	4.2377	3.9276	3.8517	6.7314	0	0	3.12473	2.64378	1.07932	1.6617	3.0726	2.7064	2.2276	2.1395	3.5555	4.8848	2.89259	1.08011	0.408244	2.0594	2.3658
	65	0.2697	522.767				Unidentified	4	1.5854	2.1335	0.818	1.5601	2.4008	1.7896	0	0	1.28592	0.918542	0.347176	1.9985	2.1914	1.6174	0.7448	0.658	0	1.20168	0.864367	0.352876	2.7448	1.508	1.9321	1.6609	0	0	1.30763	1.09911	0.448708	1.3831	3.5771	3.0437	1.3355	1.9933	3.1379	2.5373	2.4297	0.884094	0.334156	1.5691	2.3522
	66	0.2698	328.853				Unidentified	4	1.4771	1.5166	2.5409	2.1944	2.0704	2.5985	0	0	1.54974	1.04052	0.393279	2.1511	1.833	2.9535	2.6038	1.1844	0	1.78763	1.06949	0.436618	2.2225	3.3468	2.5184	0	0	0	1.34795	1.52191	0.621318	2.2863	3.4237	3.5881	2.9425	2.3953	0	0	2.09084	1.50653	0.569414	1.1323	2.169
	67	0.2699	180.907				Unidentified	4	5.7097	6.3409	6.1112	8.665	9.2254	10.8656	12.0897	11.6562	8.83296	2.57082	0.97168	6.5148	8.4748	9.6244	10.7307	10.443	11.9525	9.62337	1.91339	0.781137	7.8286	10.3333	11.0185	15.0788	16.8365	16.2501	12.891	3.66914	1.49792	10.5197	12.415	13.563	9.8856	11.2035	15.8451	14.2934	12.5322	2.15922	0.81611	9.3875	8.7881
	68	0.2701	260.849				Unidentified	4	2.0541	2.0875	1.638	2.1851	2.2659	3.3409	3.9011	3.6301	2.63784	0.850321	0.321391	1.6036	2.4063	3.036	3.5634	3.6019	0	2.36853	1.38498	0.565418	1.5178	2.4122	3.2771	3.801	5.5133	5.0192	3.5901	1.52088	0.620896	2.0686	3.4899	3.6325	1.8383	3.6732	4.483	4.7735	3.42271	1.11086	0.419866	2.1271	1.927
	69	0.2702	288.866	C6H6Cl6;	H;	4.32726	Hexachlorocyclohexane; Lindane	3	2.1082	2.7857	3.0214	3.0657	3.0337	3.3946	4.9544	5.2084	3.44651	1.07601	0.406693	2.1978	2.0843	2.7963	3.1315	3.5532	0	2.29385	1.25339	0.511695	4.1566	3.3468	3.7796	6.5822	9.3362	9.4159	6.10288	2.77279	1.13199	2.123	1.9194	2.8755	2.2709	1.6699	3.7101	2.2471	2.40227	0.685957	0.259267	1.3839	2.2052
	70	0.2702	506.775	C9H6I2O4;	KCl;	0.394652	Diiodohydroxyphenylpyruvate	3	4.4888	3.8732	4.6374	5.1047	5.6477	3.8002	0	6.0766	4.20358	1.8753	0.708796	3.4519	3.7816	4.7254	4.2627	0	0	2.7036	2.1382	0.872915	5.1016	6.0445	5.3146	6.0144	11.0181	0	5.5822	3.50466	1.43077	3.3196	3.9467	3.9167	2.9833	4.2827	0	5.5177	3.42381	1.71103	0.64671	3.0438	2.732
	71	0.2708	364.832				Unidentified	4	6.737	5.7962	5.1408	6.5032	7.7275	6.8222	5.9944	7.9513	6.58408	0.949802	0.358991	4.0658	5.7759	6.1957	7.0642	6.8659	7.3749	6.22373	1.20847	0.493355	8.0252	8.8466	7.8176	10.7987	12.2215	14.8327	10.4237	2.75114	1.12315	7.5058	8.5905	7.3985	5.3156	7.3338	8.5387	6.0969	7.25426	1.19886	0.453127	5.4543	5.2071
	72	0.2709	422.789				Unidentified	4	3.5092	4.001	4.0889	6.4266	4.8623	7.1475	8.4234	7.1061	5.69562	1.81268	0.685129	4.3672	5.2954	5.9633	4.972	6.1036	6.6715	5.56217	0.840486	0.343127	6.5064	6.5849	5.3227	8.4808	10.7646	11.1245	8.13065	2.40564	0.982099	5.5906	5.2322	6.6025	4.8283	5.1301	6.8022	5.2249	5.63011	0.767717	0.29017	3.9079	5.2191
	73	0.2718	484.783				Unidentified	4	2.0674	2.6172	1.78	2.3229	2.913	2.6943	2.9661	1.4329	2.34923	0.552016	0.208642	1.6911	1.8706	1.6401	2.4836	0	0	1.2809	1.03662	0.423199	2.6496	3.3273	3.9483	4.532	2.5736	2.9279	3.32645	0.777663	0.31748	1.699	2.8242	2.7959	2.1936	0	1.5714	2.0564	1.87721	0.959356	0.362603	1.4804	2.0544
	74	0.272	564.729				Unidentified	4	3.0106	3.074	2.6623	3.6705	3.5951	3.6631	4.4332	5.3942	3.68788	0.875371	0.330859	1.9995	3.368	3.0462	3.7709	4.0796	0	2.7107	1.50972	0.616339	3.5282	3.5635	4.654	6.4467	5.3067	6.0464	4.92425	1.23264	0.503222	3.3045	4.0792	3.2263	2.7745	3.9319	2.628	4.0361	3.42579	0.601488	0.227341	2.0247	1.9374
	75	0.2721	304.832				Unidentified	4	3.9243	4.5977	3.2596	4.6892	5.5025	6.6056	11.9646	9.0402	6.19796	2.94286	1.1123	4.3515	6.0741	6.9107	6.7363	8.2098	6.6631	6.49092	1.26265	0.515476	6.1773	5.8775	6.3263	8.9419	9.9187	14.7551	8.66613	3.41075	1.39243	5.2961	7.2248	6.3654	4.2903	5.1847	7.1179	6.1318	5.94443	1.07722	0.407149	3.7742	4.1224
	76	0.2732	480.743				Unmatched Adduct	4	3.6106	3.6897	3.7713	4.2302	4.9657	5.9108	4.9125	5.6819	4.59659	0.90641	0.342591	4.1372	4.8533	5.8554	5.9783	5.7908	2.8598	4.91247	1.23406	0.503805	4.2914	5.1037	6.732	6.7238	7.8739	8.1778	6.48377	1.52529	0.622696	3.4367	3.5478	6.0277	4.0215	3.6603	6.0289	5.0988	4.54596	1.15373	0.436068	3.5159	3.9604
	77	0.2736	424.791				Unidentified	4	2.7035	2.4614	3.5661	4.1413	3.8337	4.9582	4.4791	3.6664	3.72621	0.840356	0.317625	2.9209	3.0913	3.8419	4.7911	4.7376	4.7357	4.01975	0.863017	0.352325	3.3263	4.9539	4.716	5.4092	7.0343	6.0732	5.25215	1.26176	0.51511	3.1371	4.4509	4.8641	3.2626	3.5373	3.7101	3.8854	3.83536	0.627143	0.237038	2.3577	2.5583
	78	0.2737	222.89				Unidentified	4	1.946	1.935	2.638	2.6831	2.5194	5.0312	3.6863	3.3144	2.96917	1.02787	0.388498	2.139	2.4608	3.4015	2.5916	3.6848	2.8786	2.85938	0.587384	0.239799	2.9437	3.0316	2.5184	3.5086	3.4221	4.1827	3.26785	0.572934	0.233899	2.4509	3.4026	3.383	2.1627	2.7416	3.2155	3.4802	2.97664	0.524618	0.198287	2.1879	0
	79	0.2738	444.77				Unmatched Adduct	4	2.0762	1.0982	1.9304	2.0339	2.1264	1.5776	3.3232	2.6831	2.10613	0.670482	0.253418	1.6126	1.5502	2.2562	3.1315	1.974	0	1.75408	1.03307	0.421749	1.6804	1.8319	2.6863	3.3625	3.4221	3.7644	2.79127	0.875976	0.357616	1.1911	2.1812	2.1845	1.3517	1.4824	2.7826	2.7184	1.98456	0.650165	0.245739	1.2076	1.3246
	80	0.2738	622.685				Unidentified	4	1.9293	1.9545	2.0562	2.472	2.6006	3.766	4.2911	4.513	2.94784	1.07502	0.406318	2.3513	2.1587	2.7132	2.1596	3.8808	3.9957	2.87655	0.847692	0.346069	3.4869	2.9814	2.8401	5.5275	5.4183	4.0214	4.04593	1.18142	0.482314	1.8305	3.0455	2.8192	1.9706	2.5613	2.635	3.8108	2.66756	0.667284	0.25221	2.1856	2.0076
	81	0.2738	680.638				Unidentified	4	1.8961	1.5888	1.245	1.5738	2.4958	2.1089	5.0099	3.0181	2.36705	1.20756	0.456416	1.6408	2.4804	2.6233	1.7921	2.5862	3.938	2.51013	0.816038	0.333146	2.2934	2.7087	2.9008	4.1426	5.4835	5.1356	3.77743	1.34176	0.547773	2.0863	2.3683	2.1428	1.5614	2.1411	3.3802	3.1304	2.4015	0.63641	0.24054	1.6557	1.9445
	82	0.2739	590.755				Unidentified	4	1.861	0.9899	1.2104	2.3932	1.487	2.3386	0	0	1.28501	0.933952	0.353001	1.7453	1.2788	1.7174	1.4798	0	1.7759	1.33287	0.680484	0.277806	3.3344	3.1291	2.6045	0	1.4753	0	1.75722	1.50616	0.614886	1.5484	2.236	1.8135	2.0276	2.2357	0.4638	0	1.475	0.892681	0.337402	0.9814	1.949
	83	0.2739	764.629				Unidentified	4	1.7522	1.7795	1.1339	1.6032	1.039	1.6522	1.5215	1.9865	1.5585	0.323343	0.122212	0.7062	1.0077	0.7519	0	2.1241	0.296	0.814317	0.734885	0.300015	1.2036	1.1359	1.3065	1.856	0	1.4935	1.16592	0.626893	0.255928	0.8599	1.6794	1.3764	1.4964	0.8409	2.2852	2.6244	1.59466	0.672026	0.254002	1.5801	0.591
	84	0.2741	482.747				Unidentified	4	2.614	3.4533	3.4648	4.5449	3.6914	5.2208	4.826	5.0506	4.10823	0.93206	0.352286	2.5542	2.9878	4.0292	3.3474	3.6264	3.2351	3.29668	0.509578	0.208034	4.6585	4.4356	7.212	6.8792	6.0779	6.5373	5.96675	1.16422	0.475291	3.7764	3.5026	3.4281	3.5667	3.1488	4.483	3.3335	3.60559	0.433077	0.163688	2.658	3.3467
	85	0.2741	614.631				Unidentified	4	1.3049	1.0883	1.3421	1.6706	1.6084	2.7791	2.7858	3.522	2.01265	0.890323	0.336511	1.5362	1.7973	2.5653	2.3756	2.5938	2.5158	2.23067	0.450831	0.184051	0	2.8354	2.132	2.9239	3.4339	3.9155	2.54012	1.38158	0.564026	2.7481	2.6694	2.495	2.1537	2.2423	2.8544	2.5071	2.52429	0.257594	0.0973615	1.6683	1.9272
	86	0.2742	282.848	CH4Cl2O6P2;	K;	2.40411	Clodronic acid	3	1.1795	1.619	2.0079	2.248	2.4025	2.3201	2.0228	3.286	2.13573	0.61544	0.232614	1.7825	2.5154	2.8762	2.4836	2.5004	2.3678	2.42098	0.35689	0.1457	0	2.6545	2.7703	3.5086	3.0418	0	1.99587	1.57371	0.642465	2.2678	2.9664	2.9601	2.2709	2.3946	2.9371	3.2193	2.7166	0.393017	0.148546	2.0594	0
	87	0.2742	318.809				Unidentified	4	1.6757	1.412	0	1.7146	2.3502	2.3201	4.3346	3.6301	2.17966	1.342	0.50723	1.5524	2.2447	2.4768	3.4554	3.6848	2.9598	2.72898	0.797122	0.325424	0	2.3459	2.1826	4.3858	5.5068	4.6009	3.17033	2.03417	0.830447	2.2319	3.7516	3.8572	2.4678	2.9037	5.5651	3.2193	3.42809	1.12006	0.423343	2.1787	2.0234
	88	0.2742	684.658				Unidentified	4	1.5723	1.6215	1.2251	2.0912	1.2468	2.1383	2.4079	0	1.53789	0.753981	0.284978	0.4582	1.2272	0.9188	2.5336	0	1.1513	1.04818	0.861702	0.351788	1.3357	2.2662	2.045	1.0119	1.5103	0	1.36152	0.810477	0.330876	1.5734	1.2307	1.3602	1.2098	1.61	1.5951	1.5516	1.44726	0.17607	0.0665482	1.154	1.8474
	89	0.2742	706.668				Unidentified	4	1.698	2.0466	1.6589	2.365	1.7885	2.847	2.2157	0	1.82746	0.837809	0.316662	1.4141	1.3187	1.7107	0.5036	0	0	0.824517	0.75363	0.307668	1.8633	1.2497	2.6537	2.4508	3.014	0	1.87192	1.10833	0.452473	0.6469	1.4905	2.1644	1.0732	1.1736	1.0174	1.9998	1.36654	0.550154	0.207939	0.406	1.1675
	90	0.2745	566.738				Unidentified	4	1.9973	2.1086	1.796	2.0414	2.8052	3.8509	2.2593	0	2.10734	1.076	0.406688	1.5124	2.5668	2.6649	1.4494	0	0	1.36558	1.17383	0.479213	2.6893	3.2898	2.5398	1.7741	1.1562	4.385	2.63903	1.13412	0.463004	2.688	2.8488	2.1452	2.4666	2.2584	2.5984	3.2151	2.60293	0.36269	0.137084	1.1243	1.3771
	91	0.2748	380.808				Unidentified	4	2.0219	1.449	1.7965	2.3015	2.6075	2.3201	3.3886	3.4723	2.41968	0.716617	0.270856	1.7291	2.8945	2.7558	2.6926	2.8684	4.623	2.92723	0.938096	0.382976	2.6066	3.662	3.332	3.105	3.4221	4.8101	3.48963	0.738978	0.301686	3.6183	3.9282	2.9601	3.4282	3.2715	4.4516	3.6634	3.61733	0.479946	0.181403	2.5522	2.429
	92	0.2748	654.607	C40H76O5;	NH3;	4.93426	Unidentified	4	1.3128	1.6463	1.8157	2.0374	2.3282	1.9292	2.5727	3.8627	2.18812	0.780105	0.294852	1.5033	1.6368	1.9041	2.7396	2.449	0	1.70547	0.960826	0.392256	0	1.7751	2.3258	4.0617	4.1825	4.8101	2.8592	1.82417	0.744714	1.7013	2.2374	2.227	0	1.9951	2.3155	1.8872	1.76621	0.808992	0.30577	1.4861	2.0938
	93	0.2749	596.655				Unidentified	4	1.3827	2.0061	1.6979	0	2.1878	3.4814	2.6007	4.2614	2.20225	1.30108	0.491763	1.5953	2.282	2.8009	3.2632	2.632	2.8305	2.56732	0.572448	0.233701	0	2.5441	2.3975	4.1745	5.5133	2.9023	2.92195	1.85688	0.758067	2.0019	2.7604	3.0457	2.4786	2.2209	3.2616	2.6146	2.62624	0.442279	0.167166	1.8482	1.8421
	94	0.2751	538.697				Unidentified	4	1.6827	1.7076	2.2471	3.683	3.1791	3.2133	4.4107	3.6935	2.97713	0.998808	0.377514	2.324	2.9188	2.9914	4.4273	3.6737	4.1256	3.41013	0.801551	0.327232	3.2744	3.3188	2.9322	4.3858	5.5133	4.302	3.95442	0.964197	0.393632	2.7681	4.0482	3.3468	2.5161	2.4388	4.1668	3.7535	3.29119	0.725435	0.274189	2.2677	2.9807
	95	0.2752	438.768				Unidentified	4	2.0541	1.6735	1.4795	2.7783	2.0782	3.5232	3.7566	4.1036	2.68087	1.00815	0.381043	1.7825	2.2146	2.8762	2.6995	2.8952	2.0719	2.42332	0.465136	0.189891	1.7888	2.5267	3.0221	3.2108	3.232	5.6466	3.23783	1.30037	0.530876	3.3251	2.5694	3.5197	2.6552	3.4984	5.3095	3.5683	3.49223	0.902701	0.341189	2.1863	2.3931
	96	0.2752	540.702				Unidentified	4	2.2173	3.0897	2.1832	4.6722	3.2605	3.7754	2.6356	4.2614	3.26191	0.920273	0.347831	2.5016	3.1801	2.4782	2.8972	3.1473	3.7601	2.99408	0.48227	0.196886	3.343	3.4598	3.9173	4.2396	5.3232	4.9365	4.20323	0.795962	0.32495	2.6769	2.5722	3.5521	2.9917	2.6796	2.4492	2.6629	2.7978	0.370983	0.140218	2.5407	2.8175
	97	0.2754	738.585				Unidentified	4	1.25	0	1.2504	1.8081	1.9253	1.9348	3.2538	2.2374	1.70748	0.93464	0.353261	0.9965	1.7504	2.3022	2.2198	2.1628	2.653	2.01412	0.57631	0.235278	1.9868	2.5742	1.8194	2.601	3.7595	5.2303	2.9952	1.28933	0.526366	2.6012	2.6651	2.1616	0	0	2.8009	2.4599	1.81267	1.25414	0.474021	1.0925	1.1469
	98	0.2755	280.849				Unidentified	4	1.2973	1.8827	1.7965	2.6284	2.1152	3.3368	2.8897	2.9988	2.36817	0.701925	0.265303	1.7805	2.5196	1.983	2.4836	2.3688	2.3678	2.25055	0.298985	0.12206	1.7888	2.4693	2.8542	2.3099	3.0038	3.7644	2.6984	0.675972	0.275964	2.3953	3.2075	3.2916	2.1087	2.4951	3.8647	2.5533	2.84517	0.622165	0.235156	1.2901	1.7343
	99	0.2756	498.722	C10H4Br3ClN2O;	NaCl;	3.97013	Tribromo-(chlorobenzoyl)imidazole	3	1.4952	1.6215	1.9198	2.0173	0	2.9697	2.0228	3.6301	1.95955	1.06836	0.403803	1.8599	1.6954	2.2661	2.1596	3.6812	3.8478	2.585	0.937671	0.382803	0	2.4698	2.7987	3.6548	4.3726	3.3461	2.77367	1.51307	0.617707	2.5065	2.795	2.3069	2.1277	2.7525	3.8088	2.3754	2.66754	0.556583	0.210369	2.0893	0
	100	0.2757	648.712				Unidentified	4	2.0456	1.4017	2.053	2.3845	1.8686	1.934	2.1541	1.4205	1.90775	0.343054	0.129662	1.7709	2.193	2.4701	1.8118	0.905	1.6279	1.79645	0.535731	0.218711	3.0759	1.7652	3.0089	1.9174	0	3.7644	2.2553	1.33861	0.546487	0.9663	1.8182	1.8355	2.1256	0.8751	0	0.7372	1.19399	0.759043	0.286891	0.8435	1.4388
	101	0.2757	714.578	C39H82NO6P;C40H81NO5;	Na;NaCl;	0.895634	PE-NMe2(O-16:0/O-16:0); N-(2-hydroxydocosanoyl)-phytosphingosine	3	1.774	1.4276	1.5748	2.2044	2.6226	3.3641	3.1095	4.5771	2.58176	1.07002	0.404428	0	1.8439	1.9961	1.9955	2.6709	3.061	1.9279	1.05537	0.430853	1.9581	2.2902	2.7381	3.0713	4.031	3.2845	2.89553	0.740469	0.302295	1.7517	2.4126	1.8574	1.7724	2.1559	3.123	2.8525	2.27507	0.545675	0.206246	1.563	1.4897
	102	0.2758	251.162	C13H24O3;C12H22O;	Na;HCOONa;	3.34445	keto tridecanoic acid; Dodecenal; Dodecadienol; Geosmin	3	0.8649	1.1505	0	0	0	1.392	1.2786	0.9503	0.704538	0.606662	0.229297	0	1.6033	0	0.9718	1.4476	0.74	0.793783	0.689574	0.281517	2.0846	1.9297	0	0	2.0913	1.4639	1.26158	1.00362	0.409727	0	2.367	1.184	0.757	0.8552	0	0.8881	0.864471	0.802756	0.303413	0.671	0.7688
	103	0.2759	398.764				Unidentified	4	1.7722	1.577	1.9022	2.3636	2.4149	3.5728	0	2.2096	1.97654	1.00413	0.379526	2.1978	2.3517	2.7963	2.8075	2.4345	0	2.09797	1.05643	0.431284	2.2309	0	2.9382	1.7543	3.4221	3.137	2.24708	1.26038	0.514546	2.6732	3.1207	2.3681	0	2.1095	2.6544	3.3303	2.32231	1.10509	0.417686	1.5	1.638
	104	0.2759	456.725				Unidentified	4	1.7136	1.9795	2.0214	2.4098	0	4.0091	3.1787	3.1566	2.30859	1.21023	0.457423	0	0	2.9184	2.9155	3.1848	2.9377	1.99273	1.54689	0.631514	0	2.0989	2.9382	3.0701	3.3576	2.7187	2.36392	1.23289	0.503326	2.5065	2.9664	3.5521	0	2.8526	4.1738	2.8863	2.70539	1.31367	0.49652	1.9053	1.7153
	105	0.2759	598.664				Unidentified	4	1.7694	2.1377	2.0295	2.9897	2.5078	3.6722	3.7409	4.6935	2.94259	1.02012	0.38557	2.5279	3.0058	2.9356	2.6144	3.0515	2.8118	2.8245	0.214017	0.0873721	2.914	2.3475	3.1455	4.3621	5.5133	5.0192	3.8836	1.26641	0.51701	2.0132	2.6624	3.6882	2.389	2.943	3.725	2.9159	2.90524	0.63348	0.239433	2.6601	1.9327
	106	0.2759	682.646				Unidentified	4	2.1488	2.7501	1.9572	2.1315	2.0667	3.0019	4.8642	3.4247	2.79314	0.986556	0.372883	1.5541	2.1972	2.4131	3.0267	2.0996	3.346	2.43945	0.651984	0.266171	2.9058	2.9397	3.8383	4.007	4.1507	5.8242	3.94428	1.06579	0.435105	2.4504	2.2049	2.7209	1.6147	2.1067	3.6895	2.4812	2.4669	0.643477	0.243211	1.6373	2.1689
	107	0.276	396.78				Unidentified	4	1.6636	1.1505	1.4267	1.6592	1.7347	2.3201	0	2.2096	1.52055	0.722835	0.273206	1.4626	0	2.3969	2.4836	3.4216	1.9239	1.9481	1.15679	0.472256	1.6804	2.0989	1.8943	2.0467	3.4221	3.137	2.3799	0.717561	0.292943	1.4858	2.3557	2.1582	0	1.7104	1.855	2.7753	1.76291	0.887737	0.335533	1.4677	0
	108	0.276	656.619	C40H81NO5;C40H78O5;	H;NH3;	1.03561	N-(2-hydroxydocosanoyl)-phytosphingosine; DG(37:0)	3	2.0001	1.6618	1.4381	0	2.6358	3.6232	4.0456	4.2478	2.45655	1.46574	0.553997	1.9375	2.0697	2.3529	2.4803	3.9369	3.948	2.78755	0.9153	0.373669	3.6415	2.5142	2.6756	4.2079	3.8521	3.9735	3.47747	0.709607	0.289696	2.4838	2.4141	2.2879	0	2.2862	3.1459	2.5663	2.16917	1.00032	0.378084	2.3642	1.9846
	109	0.2761	624.687				Unidentified	4	1.679	1.6993	1.9467	2.4538	2.6517	3.0331	2.404	2.1073	2.24686	0.475311	0.179651	1.398	2.1737	1.288	1.9056	1.7751	2.9598	1.9167	0.606398	0.247561	2.199	3.3484	2.8464	6.703	4.6578	3.4881	3.87378	1.60651	0.655854	1.7507	2.5519	2.6233	1.9974	2.0875	2.8042	2.2054	2.28863	0.380502	0.143816	1.509	1.008
	110	0.2762	800.561				Unidentified	4	1.1728	1.1931	1.7448	0	1.4072	1.846	0	0	0.920487	0.79757	0.301453	1.0303	1.4479	0	1.3686	1.5484	1.708	1.18387	0.622344	0.254071	2.043	2.3153	2.2803	2.1127	0	1.6276	1.72982	0.882408	0.360242	1.4963	0.8216	1.7363	1.3216	0.7497	1.2177	2.0587	1.34313	0.470892	0.17798	0.7661	0.8439
	111	0.2763	496.717				Unidentified	4	0.716	1.6231	2.077	3.2447	2.4918	2.4959	3.7053	2.0602	2.30175	0.927127	0.350421	1.689	2.2299	3.7668	0	3.6812	3.4038	2.46178	1.46893	0.599688	0	2.4092	2.1221	4.6782	4.3726	6.6923	3.37907	2.34909	0.959011	3.118	2.8136	2.7304	0	3.2225	3.0754	3.109	2.58127	1.15189	0.435373	2.1466	2.0372
	112	0.2764	322.847	C8Cl4N2;	NaCl;	3.90279	Chlorothalonil	3	2.0541	2.3057	1.9729	2.3671	2.5825	0	3.2792	1.9342	2.06196	0.939692	0.35517	1.3178	1.9882	0	0	1.9855	0	0.881917	0.996502	0.40682	1.7861	1.9964	2.5681	0	0	0	1.05843	1.18737	0.484741	2.2999	4.3389	2.4527	2.047	3.1651	0	0	2.04337	1.58702	0.599838	2.2735	2.3125
	113	0.2765	712.562				Unidentified	4	1.8319	1.2706	1.6334	2.1486	1.8164	1.6429	2.3765	0	1.59004	0.724587	0.273868	1.1363	1.6631	2.0536	1.9437	1.5079	0	1.3841	0.752554	0.307229	0.8708	1.076	1.4811	2.9929	0	5.3145	1.95588	1.91615	0.782266	1.1223	1.8063	1.8608	0.9916	1.455	1.7058	3.1885	1.7329	0.723514	0.273463	1.0646	1.1956
	114	0.2768	556.673				Unidentified	4	1.2523	1.4838	1.5308	2.0127	2.5505	2.7038	2.7452	2.0518	2.04136	0.584139	0.220784	1.7015	2.1168	2.4768	2.5044	0	0	1.46658	1.1728	0.478794	2.1595	1.6186	2.0852	3.5788	0	2.7187	2.0268	1.19858	0.489319	2.3493	2.4758	3.9267	1.7256	2.6785	1.6648	4.0813	2.70029	0.966747	0.365396	2.2234	1.7043
	115	0.2768	716.591				Unidentified	4	1.4061	1.7009	0.9479	2.2134	2.3958	2.8387	1.6428	0	1.6432	0.891536	0.336969	1.8622	0.9578	1.9769	2.7514	1.5513	0	1.5166	0.945472	0.385987	1.6646	2.5867	1.7133	3.4792	3.1649	2.5096	2.51972	0.737969	0.301275	2.1061	2.0381	2.1462	0.806	1.3943	3.3624	2.5195	2.05323	0.809606	0.306002	1.6533	1.4757
	116	0.2769	658.623				Unidentified	4	1.5947	1.0485	1.4745	2.0097	1.9716	1.9079	2.2254	2.3675	1.82498	0.430273	0.162628	1.463	1.5238	2.2285	1.4465	2.4703	0	1.52202	0.863028	0.35233	1.77	3.2604	2.2065	2.1392	2.8517	2.9476	2.52923	0.573818	0.23426	1.5519	2.0196	2.1228	1.2566	1.7156	2.2566	2.0956	1.85981	0.362216	0.136905	1.7896	1.0709
	117	0.2769	798.558				Unmatched Adduct	4	1.2612	1.209	1.6033	1.5987	1.7794	1.9713	0	0	1.17786	0.768312	0.290395	1.5339	1.5114	1.9322	0	0	0	0.829583	0.921013	0.376002	1.3266	2.8505	1.8127	2.6707	0	0	1.44342	1.24924	0.510001	1.397	1.4165	2.0212	0	1.9236	0.9728	2.8749	1.51514	0.902344	0.341054	0.9399	0.9956
	118	0.2772	740.602				Unidentified	4	1.8017	1.5593	2.3792	2.1531	1.771	2.0592	0	0	1.46544	0.938895	0.354869	1.8862	1.4148	2.0311	0	0	0	0.888683	0.994608	0.406047	2.1689	3.2699	3.5089	4.3997	0	6.3861	3.28892	2.14227	0.874577	0	2.9315	2.1228	2.1486	1.8407	0	1.204	1.46394	1.12193	0.424049	1.9042	2.1261
	119	0.278	554.686				Unidentified	4	2.1622	1.5506	1.2652	1.7042	1.5108	0.6622	0	3.3144	1.5212	0.984042	0.371933	1.3048	1.5436	2.2151	2.5044	2.8952	0	1.74385	1.03923	0.424264	2.03	2.7736	1.4714	2.7155	1.5124	3.3461	2.30817	0.757714	0.309336	1.8521	1.8288	2.5515	1.6174	0.6677	1.855	1.3321	1.67209	0.576073	0.217735	1.2837	0
	120	0.2789	858.519	C44H82NO8P;	KCl;	0.221312	PC(36:3)	3	1.5333	1.0584	0.9585	1.4538	1.0015	1.3452	0.8177	1.6929	1.23266	0.315081	0.119089	1.0324	1.3766	1.8296	2.6529	0	0	1.14858	1.04218	0.42547	1.0899	1.2096	1.504	1.1566	0	1.0856	1.00762	0.51721	0.21115	1.3958	0	1.6096	0.8824	0	0	1.7568	0.806371	0.801291	0.302859	0.6585	0.9717
	121	0.2793	478.709				Unidentified	4	1.9852	1.6212	1.8815	2.0129	2.2942	3.2799	0	4.3839	2.18235	1.27052	0.480212	1.9043	2.1069	2.7821	2.5668	3.4216	4.4066	2.86472	0.92518	0.377703	2.3485	2.0989	3.2513	4.5626	5.3232	5.0192	3.76728	1.39165	0.568137	1.7916	2.821	2.2835	2.1548	2.2621	3.0917	3.3303	2.53357	0.556645	0.210392	1.2408	1.7763
	122	0.2814	362.791				Unidentified	4	2.0541	2.0867	1.7437	2.1944	2.6337	3.2481	0	0	1.74509	1.16823	0.441551	1.9354	1.9775	2.2715	3.2395	2.2372	1.9239	2.26417	0.501618	0.204785	2.3309	2.1607	2.6024	2.9239	4.3726	3.1703	2.9268	0.79961	0.326439	1.8508	2.2684	2.4527	1.7836	1.7512	0	1.9982	1.72927	0.8057	0.304526	1.5097	1.686
	123	0.2853	360.794	C5H4Cl6O3;	K;	4.6564	Clorethate	3	1.7298	1.4643	1.7807	2.3015	2.6337	0	2.1673	1.894	1.74641	0.795103	0.300521	1.6911	0	0	2.2676	1.8424	2.6638	1.41082	1.14452	0.46725	2.0598	2.7794	2.6024	2.0467	2.6616	2.5096	2.44325	0.314544	0.128412	0	1.7449	0	1.3988	2.2235	1.7005	0	1.00967	0.974758	0.368424	1.9737	1.7825
	124	0.2887	284.894				Unidentified	4	2.8326	0	3.2937	3.4554	3.2051	0	0	0	1.59835	1.71742	0.649124	0	2.7759	0	0	0	0	0.46265	1.13326	0.46265	3.5601	4.8598	0	0.8772	0	0	1.54952	2.12864	0.869012	3.1019	0	0	2.7405	3.2903	0	0	1.30467	1.63519	0.618043	2.2949	2.699
	125	0.3065	196.873				Unidentified	4	1.9034	2.0261	0	3.1072	3.3194	4.0549	4.9125	0	2.41544	1.78491	0.674632	2.1045	3.0877	3.5156	4.4273	3.999	3.4038	3.42298	0.800026	0.326609	2.8138	3.2838	3.5015	4.8244	5.2681	4.6921	4.06395	0.991029	0.404586	3.0445	3.6589	3.8692	2.9865	4.0808	5.1663	3.7458	3.79314	0.730923	0.276263	2.8302	2.6856
	126	0.3114	80.9503				Unidentified	4	4.5867	5.0473	3.728	6.007	6.6001	7.4377	7.243	8.5295	6.14741	1.61527	0.610516	4.9228	6.1003	6.626	5.7439	8.0754	9.2228	6.78187	1.59083	0.649454	6.0106	7.0993	6.0567	8.523	9.1421	9.6566	7.74805	1.5803	0.645155	5.5796	5.0973	5.8807	5.1478	6.1253	7.9925	6.2897	6.01613	0.983187	0.37161	3.8329	4.4863
	127	0.312	112.898				Unidentified	4	3.7035	3.2149	3.2821	4.3156	4.7488	5.7099	7.8354	6.9449	4.96939	1.71834	0.64947	3.0455	3.2249	0	5.7439	5.4169	6.8142	4.0409	2.46862	1.00781	3.8451	4.2924	4.6369	6.2285	6.654	6.9014	5.42638	1.3218	0.539622	6.1996	5.669	8.4059	5.8245	5.7941	8.5387	7.152	6.79769	1.24693	0.471293	4.8682	4.6738
	128	0.3212	254.829				Unidentified	4	1.4055	1.8406	1.8494	2.5191	2.4623	3.3409	3.3232	2.8382	2.4474	0.710616	0.268587	1.5997	2.2972	3.1958	2.9155	3.4216	2.0719	2.58362	0.706981	0.288624	2.0146	3.1195	2.8542	4.0934	3.8023	2.0913	2.99588	0.856901	0.349828	2.123	3.3154	2.4415	2.1015	2.4435	0	2.8863	2.18731	1.05572	0.399024	1.7613	1.8788
	129	0.3215	256.826				Isotope	4	2.3786	2.2965	2.0079	2.9581	2.8575	4.2731	5.2015	0	2.74665	1.5511	0.586259	2.0126	2.4063	0	3.2395	4.4744	0	2.02213	1.77884	0.726207	2.4065	4.0403	2.6863	4.8244	0	0	2.32625	2.00687	0.819302	3.118	2.9664	2.6218	1.9481	3.2656	0	2.7753	2.38503	1.13566	0.429238	1.7194	2.1198
	130	0.3252	381.079	C12H22O11;C12H18N2O4;	K;NaCl_HCOONa;	0.708513	Galactosyl-myo-inositol; Glucosyl-glucose; Glucopyranosyl-glucopyranose; Galactopyranosyl glucose; Trehalose; Cellobiose; Aldosyl-fructoside; Glucosyl-mannose; kojibiose; Maltose; Cellobiose; Gentiobiose; Lactose; Maltose; Cellobiose; Fructosyl-fructofuranose; Glucosyl-mannose; Maltose; Epimelibiose; fagopyritol B1; Galactinol; Gentiobiose; Inulobiose; Isomaltose; Lactose; Lactulose; Laminaribios…	3	0	0	0.4756	0	0	0	0	0	0.05945	0.16815	0.0635547	0.5485	0.92	0.9933	0.8639	1.316	0	0.773617	0.451925	0.184498	0	0	0	0	0	0	0	0	0	0	0	0	0	0	0	0	0	0	0	0	0
	131	0.3281	96.9241				Unidentified	4	2.1082	2.7818	2.379	0	3.8533	3.5265	0	5.414	2.50785	1.8564	0.701654	2.2912	3.1323	0	0	0	0	0.903917	1.42538	0.581908	2.6066	3.6206	2.3242	4.532	4.6547	3.3715	3.51827	0.960008	0.391922	2.896	4.8767	3.4676	3.9519	0	0	3.4414	2.66194	1.91713	0.724609	3.2157	3.0694
	132	0.3281	198.868				Unidentified	4	1.6518	1.3888	2.0383	0	2.1823	3.2481	3.9002	1.8146	2.02801	1.17875	0.445525	1.4626	2.4063	2.7164	0	2.5004	2.3678	1.90892	1.02986	0.420437	2.361	2.0817	3.3579	0	2.8517	0	1.77538	1.44247	0.588885	1.7156	2.4429	2.2599	1.568	2.3946	0	0	1.483	1.06583	0.402844	1.5313	1.3836
	133	0.3324	271.968	C9H6ClNO4;C6H3N3O6;C4H8NO7P;C3H4ClN5;	Na_Na;NaCl;NaCl;NaCl_HCOONa;	1.61784	Amino-dihydroxy-chlorocoumarin; Trinitrobenzene; Amino-oxo-phosphonooxybutanoate; Amino-oxo-phosphonooxybutyrate; Phospho-aspartate; Deisopropyldeethylatrazine	3	3.7691	3.1909	2.9568	4.3775	3.8057	4.2731	0	4.1036	3.30959	1.42671	0.539244	3.0846	3.5416	5.0613	0	4.606	0	2.71558	2.22006	0.906336	3.9352	3.4784	3.4419	4.8244	5.3232	6.9014	4.65075	1.33383	0.544534	3.7343	5.7893	4.4783	3.583	4.0637	5.8743	4.2184	4.53447	0.934522	0.353216	3.0872	3.4973
	134	0.3328	152.025				Unidentified	4	3.7113	3.4227	2.9186	4.0326	5.0944	3.6193	4.6248	1.9377	3.67017	0.978551	0.369858	3.3502	5.489	4.0669	4.5953	4.8692	0	3.72843	1.96526	0.802314	4.1566	3.7373	4.7018	4.3307	5.4672	5.6466	4.67337	0.753505	0.307617	4.7721	6.0449	5.1897	4.7647	5.3094	2.4734	5.6783	4.89036	1.16121	0.438897	4.6514	4.0724
	135	0.3343	285.997	C9H9Cl2NO;	HCOONa;	0.0699299	Propanil	3	1.5136	1.5559	1.3738	1.6057	0	2.4129	0	2.9743	1.42952	1.03493	0.391168	1.3254	1.6568	1.8376	1.9437	2.2372	0	1.50012	0.794906	0.324519	1.8972	0	2.4345	3.0701	3.6122	3.5553	2.42822	1.36106	0.55565	1.7964	2.5781	0	1.6761	0	0	2.4422	1.21326	1.17922	0.445703	1.5097	1.4782
	136	0.3352	160.037	C7H7NO2;C4H11NO3;C2H7N5;C3H9NO;	Na;K;NaCl;HCOOK;	4.12405	Nitrotoluene; Pyridylacetic acid; Aminobenzoate; Anthranilate; Benzhydroxamic Acid; Methyl nicotinate; Salicylaldoxime; Salicylamide; Tris-Hydroxymethyl-Methyl-Ammonium; Tromethamine; Biguanide; Aminopropanol; Methoxyethylamine; Monomethylethanolamine; Trimethylamine-oxide	3	4.3265	3.8349	4.528	5.5803	6.0769	4.6521	3.3841	4.7349	4.63971	0.869671	0.328705	4.0658	4.5762	3.1159	3.1315	2.7636	4.8698	3.7538	0.87107	0.355613	6.8905	5.491	4.773	5.1935	0	0	3.72467	2.97137	1.21306	3.4926	2.4429	1.8606	2.9675	2.5675	0	3.0922	2.34619	1.1587	0.437948	3.1891	1.8936
	137	0.3354	782.462	C41H64O13;C41H72NO8P;	NH3;Na_Na;	1.40581	Digitoxin; PE(36:5)	3	0	0	0.8018	0	0	0	0	0	0.100225	0.283479	0.107145	0	0	0	0	0	0	0	0	0	0	0	0.9234	0	0	0	0.1539	0.376976	0.1539	0	0	0	0	1.1819	0	0	0.168843	0.446716	0.168843	0	0
	138	0.3359	280.094	C15H15NO3;C12H19NO4;C9H11FN2O6;C10H15N5O;C11H17NO2;C9H19NOS;	Na;K;NH3;NaCl;HCOOK;Na_HCOONa;	4.8198	Ismine; Tolmetin; Choline salicylate; (Oxooctanoyl)homoserine lactone; Fluorouridine; Dihydrozeatin; Dimethoxyamphetamine; Deterenol; Butyrylthiocholine; EPTC	3	0	2.7818	2.8003	3.483	4.1999	3.8977	2.9487	3.2905	2.92524	1.28778	0.486737	3.458	3.989	3.7121	3.8737	0	2.8329	2.97762	1.51547	0.618688	3.3981	3.2465	2.6024	2.4215	3.6122	2.8664	3.02452	0.46926	0.191575	4.6527	5.7101	4.6715	4.7765	4.8959	3.4009	7.7189	5.11807	1.33201	0.503453	4.3358	3.8869
	139	0.3363	154.06	C7H11N;	Na_Na;	1.94729	Cyclohexyl isocyanide	3	6.5362	6.1063	5.7393	6.3909	8.3576	5.5051	3.3232	4.1036	5.75777	1.54064	0.582307	6.6094	8.4921	4.8258	4.2113	4.2838	0	4.73707	2.8473	1.1624	5.9351	4.9293	5.0359	4.4378	0	3.9194	4.04292	2.09134	0.853784	5.9199	5.1356	4.2485	6.1916	6.0282	4.9939	5.2795	5.3996	0.691238	0.261263	6.0506	5.5641
	140	0.3369	176.042	C4H9N3O2;	Na_Na;	0.170415	Creatine; Guanidinopropanoate	3	7.5425	7.2048	6.3557	8.875	9.8359	6.1158	0	7.0055	6.6169	2.94999	1.11499	8.6748	9.9091	6.429	6.9569	0	7.1243	6.51568	3.44104	1.4048	8.5311	9.6183	4.8941	0	2.404	3.4292	4.81278	3.68252	1.50338	8.6718	7.6604	6.2246	9.7714	7.252	0	7.1634	6.67766	3.159	1.19399	9.3761	8.9615
	141	0.3379	595.924				Unidentified	4	1.3674	1.3108	2.0346	2.2265	1.6501	1.2064	1.4359	0.7892	1.50261	0.46059	0.174087	1.6825	2.4417	0.4633	0.8639	0	2.6638	1.35253	1.08383	0.442471	1.2851	1.4773	0.9093	0.5848	0	0.8365	0.848833	0.525231	0.214425	1.38	1.8971	1.1756	1.5757	1.4759	1.5459	1.4431	1.49904	0.219459	0.0829476	1.6545	1.7768
	142	0.338	242.004	C8H7NO5;C7H5NO3;	Na_Na;Na_HCOONa;	2.56194	Hydroxy-methylpyridine-dicarboxylate; Clavulanate-aldehyde; TRIBOA; Nitrobenzaldehyde; Imino-oxocyclohexa-dienecarboxylate	3	8.871	9.1184	7.3384	8.5388	8.6789	8.8356	10.0464	8.5567	8.74802	0.748136	0.282769	6.466	9.9559	10.6782	6.4055	5.6415	10.8946	8.34028	2.41414	0.985569	8.6226	9.9229	8.0684	9.5924	10.2813	12.2272	9.7858	1.45359	0.593427	7.0539	6.6011	6.9692	6.0343	8.4765	8.2229	5.1241	6.926	1.17273	0.44325	6.7059	6.2611
	143	0.3387	214.009	C6H3N3O6;C7H7NO4;C3H4ClN5;C6H5NO2;	H;Na_Na;HCOONa;Na_HCOONa;	4.29888	Trinitrobenzene; Dihydrodipicolinate; Furoylglycine; Dihydroxyanthranilate; Methylpyrrole-dicarboxylic acid; Deisopropyldeethylatrazine; Isonicotinic acid; Nicotinate; Nitrobenzene; Picolinic acid	3	2.9858	3.0307	2.9186	3.6669	4.1403	6.2561	0	4.7349	3.46666	1.79772	0.679476	3.2154	4.1241	4.8772	0	0	0	2.03612	2.2917	0.935583	3.3489	4.0938	5.0655	5.7016	3.9924	6.0429	4.70752	1.06146	0.433339	4.3965	6.3571	4.9959	3.859	4.4186	4.1432	0	4.02433	1.95433	0.738667	2.8514	3.785
	144	0.3396	299.964				Unmatched Adduct	4	1.4299	2.0516	1.5262	2.6831	2.8623	3.9566	5.4645	4.0105	2.99809	1.39725	0.528109	0	2.7337	4.6674	3.4554	2.8952	4.7357	3.08123	1.73451	0.70811	2.6281	3.3468	4.1896	3.9472	6.0837	4.7429	4.15638	1.19117	0.486295	2.3427	2.8792	3.0447	1.6449	2.8898	3.4009	1.7762	2.56834	0.664729	0.251244	0	1.6856
	145	0.3398	257.979	C5H9Cl2N3O2;C8H7NO4S;C5H7N3O2;	Na_Na;Na_Na;NaClx2;	4.49648	Carmustine; Indoxyl sulfate; Dimetridazole	3	2.9858	2.1442	1.6362	2.9017	2.5765	2.6846	1.5893	2.8409	2.4199	0.561159	0.212098	2.3025	3.4075	2.9561	2.3756	2.9529	2.9115	2.81768	0.413517	0.168817	1.856	2.8843	2.7703	3.0701	2.4715	4.3918	2.90733	0.841985	0.343739	2.3793	2.7047	2.791	2.16	2.4766	3.2013	3.1083	2.68874	0.380741	0.143907	2.4745	2.1036
	146	0.3403	126.977				Unidentified	4	1.6217	1.6605	1.5323	2.1409	2.9194	1.856	2.6007	2.012	2.04294	0.494142	0.186768	1.9484	2.8409	2.2371	2.0517	2.632	3.1078	2.46965	0.463008	0.189022	2.5513	2.392	2.5184	1.4251	5.5064	3.3385	2.95528	1.39053	0.567682	1.3344	1.9194	2.3681	1.2436	2.2518	0	1.4431	1.50863	0.80006	0.302394	1.8032	1.4275
	147	0.3405	573.944				Unidentified	4	1.6012	1.7251	1.3778	3.0202	2.7347	1.3847	1.5893	1.1048	1.81723	0.684912	0.258873	2.0449	2.3416	2.3939	1.2958	0	2.6638	1.79	0.994564	0.406029	1.1524	1.0826	0.5634	0	0	0	0.4664	0.549963	0.224521	2.0364	2.6078	2.3543	2.4078	1.7837	0	1.5942	1.82631	0.881558	0.333198	1.902	1.6217
	148	0.3408	228.926	C6H7BrO2;C3H7I;	K;NaCl;	4.58663	Bromobenzene-dihydrodiol; Iodopropane	3	1.3514	1.5056	1.337	1.7663	3.0337	3.1358	2.4563	0	1.82326	1.03345	0.390609	1.7521	2.3979	3.2265	2.1596	2.5698	0	2.01765	1.10203	0.449902	2.3309	3.9939	3.8654	4.2396	1.3308	1.0457	2.80105	1.4205	0.579916	2.0467	2.1812	2.6563	1.1536	1.8354	0	2.2202	1.72763	0.888671	0.335886	1.1433	1.2044
	149	0.3409	370.869				Unidentified	4	0.4865	0.6799	0.5508	1.2181	1.1171	1.4659	0	0.947	0.808163	0.47127	0.178123	1.0055	1.157	1.1034	0.5399	0.9212	1.156	0.9805	0.23466	0.0957996	1.2467	1.3975	1.5568	1.3157	0	1.2548	1.12858	0.564674	0.230527	0.9254	0.9597	0.5074	0.4234	0.9396	1.2367	0.5551	0.792471	0.299568	0.113226	0.6251	0.6646
	150	0.3413	312.909				Unidentified	4	2.2651	2.3481	2.1189	2.4469	3.4865	2.2494	2.6007	2.5253	2.50511	0.426424	0.161173	2.3172	3.0328	2.3969	0.6479	2.3688	0	1.79393	1.18611	0.484225	3.2358	3.1334	3.3566	0	0	0	1.62097	1.77709	0.725492	1.6843	1.9194	1.5223	1.776	1.8146	0	1.5542	1.46726	0.662186	0.250283	1.8772	1.429
	151	0.3415	162.114				Unidentified	4	2.2394	2.5682	2.6488	2.9791	2.672	1.9351	1.0114	0	2.00675	1.01366	0.383126	2.7471	3.7707	2.2371	0	1.0528	1.7759	1.9306	1.31668	0.537533	2.7018	0	1.4271	0	0	0	0.68815	1.13974	0.465297	3.8962	3.8391	2.9269	5.0428	3.9061	2.1339	2.3106	3.43651	1.03265	0.390306	2.9991	2.4642
	152	0.3419	62.9835				Unidentified	4	1.5012	1.3597	1.2227	1.5522	1.7347	1.4848	0	0	1.10691	0.698823	0.26413	1.2797	1.7637	1.8376	1.919	1.4476	1.6325	1.64668	0.244463	0.0998016	2.0598	2.3293	2.086	0	0	0	1.07918	1.18592	0.484148	1.3161	1.2955	0.9144	0.6488	1.3113	1.5459	1.4431	1.21073	0.315783	0.119355	1.5763	1.4468
	153	0.3427	191.042	C6H6N2O;	HCOONa;	0.994541	Isonicotineamide; Nicotinamide; Pyridine-aldoxime; Picolinamide	3	0	0	2.6666	2.7377	3.4802	0	3.1064	3.6301	1.95263	1.64937	0.623403	2.3298	2.955	3.2171	0	0	3.2558	1.95962	1.55366	0.634281	3.1048	2.8893	4.294	3.7031	0	4.6009	3.09868	1.65508	0.675684	0.8337	0	1.184	0	0.7412	0	0	0.394129	0.509727	0.192659	0	0
	154	0.3431	286.884	C3H7I;	NaCl*2;	0.592575	Iodopropane	3	0.7332	0.6276	0.5284	0.8256	1.3451	1.9488	0.5779	0.3157	0.862787	0.53155	0.200907	0.5028	0.4735	1.6319	1.5648	1.4476	1.4799	1.18342	0.542495	0.221473	0.9266	1.6296	1.4271	0.789	0	0	0.795383	0.689567	0.281514	0.7077	0.9527	1.4378	0.2703	1.2543	0.4638	1.1101	0.885243	0.425034	0.160648	0.3663	0.4818
	155	0.3437	318.945				Unidentified	4	1.5316	1.3597	1.3421	1.4685	2.0569	0.8352	0	1.088	1.21025	0.603183	0.227982	1.1149	1.9496	0.8647	0	0.9212	0	0.8084	0.737454	0.301064	2.6067	1.3026	0.8774	1.1695	0	0	0.9927	0.971236	0.396505	0	0.6107	0.7612	0.8193	0.8727	0	0	0.4377	0.417167	0.157674	0.6442	0.9065
	156	0.3443	170.966	C3H7I;	H;	2.51512	1-iodopropane	3	2.3244	2.0918	2.0055	3.3536	3.8862	3.2481	0	0	2.1137	1.4618	0.552508	2.3181	3.139	2.6406	3.4554	3.0268	0	2.42998	1.25476	0.512252	3.3263	4.4134	2.6024	0	1.711	0.8365	2.14827	1.62799	0.664626	1.9383	3.0167	2.2905	2.9255	2.4516	0	2.3312	2.13626	1.01342	0.383036	2.2139	1.7928
	157	0.3444	290.926	CH3ClHg;C4H9O6PS;	K;KCl;	3.81539	Methylmercury chloride; Methyl-phosphothio-glycerate	3	1.0613	0.7278	1.2681	1.2141	1.8788	0.658	0.5779	0	0.92325	0.56263	0.212654	1.1822	1.6789	1.5979	0	0	0	0.743167	0.831361	0.339402	1.9514	2.4732	0.9838	1.3157	0	1.2548	1.32982	0.847072	0.345816	0.9199	0.8963	0.8553	0.9032	1.1455	0	0	0.674314	0.470133	0.177694	1.2354	0.9595
	158	0.3448	188.169				Unidentified	4	1.4324	2.3278	2.1664	2.6015	2.4062	0	0	0.6313	1.4457	1.09541	0.414026	3.3884	2.2447	1.518	1.3498	1.7108	2.0719	2.04727	0.737295	0.300999	1.6532	2.0069	1.0913	1.0234	0.9506	0	1.1209	0.687625	0.280722	2.4236	2.3557	0	2.3791	2.3667	0	0.9991	1.50346	1.14456	0.432602	3.9273	3.8417
	159	0.3449	206.058	C9H10FNO2;C9H13NO2;C8H11N;	Na;K;HCOOK;	0.0970601	Fluorophenylalanine; Sympatol; Dihydrophenylalanine; Methoxytyramine; methyldopamine; Epinine; Ethinamate; Metaraminol; Phenylephrine; Pyrithyldione; Phenylethylamine; Dimethylaniline; Xylidine; Chloro-Methyl-Aniline; Ethylaniline; Phenethylamine	3	6.076	6.0292	5.4465	5.0847	6.6964	0	4.1099	4.8927	4.79192	2.09621	0.792294	5.3012	5.4284	4.5762	3.7794	5.1107	3.8478	4.67395	0.727418	0.296967	6.8039	4.2931	5.6656	4.3858	4.943	5.0192	5.1851	0.935101	0.381754	7.0127	4.7743	5.3793	6.5361	8.4439	4.5722	4.7602	5.92553	1.45546	0.550111	6.7537	6.6194
	160	0.3449	220.022	C8H7NO5;C6H7N5O2;C7H5NO3;C4H9NO4;C5H5N5;	Na;K;HCOONa;HCOOK;HCOOK;	2.727	Hydroxy-methylpyridine-dicarboxylate; Clavulanate-aldehyde; TRIBOA; Hydroxy-methylguanine; nitrobenzaldehyde; Imino-oxocyclohexadienecarboxylate; Hydroxymethylserine; Hydroxy-threonine; Adenine	3	5.5939	5.5815	7.1202	7.3204	8.9073	3.3209	0	0.7892	4.82918	3.18824	1.20504	7.4584	8.6657	5.4737	2.7222	2.3815	2.8118	4.91888	2.70182	1.10301	6.085	5.9856	3.4088	2.6456	2.3924	1.8822	3.73327	1.85021	0.755344	4.8974	3.4026	2.4026	3.9697	5.7307	1.5459	2.1092	3.43687	1.53232	0.579164	7.4513	3.8634
	161	0.3454	146.985	C6H4O2;	K;	0.612311	Benzoquinone	3	2.0983	2.7818	2.051	2.6468	2.6337	2.4129	2.8897	1.4205	2.36684	0.487664	0.18432	1.9653	1.8032	2.2101	2.4836	3.29	2.2199	2.32868	0.525777	0.214647	2.8834	2.5311	0	2.1072	2.755	2.5034	2.13002	1.07666	0.439544	3.0624	3.0737	2.3681	3.2397	3.0328	1.3913	2.2202	2.62689	0.66941	0.253013	2.0594	2.3495
	162	0.3457	174.018				Unidentified	4	1.1886	0	1.0225	1.7058	1.2462	0	0	0	0.645388	0.716025	0.270632	0	0.9086	0	0	0	1.7759	0.447417	0.745424	0.304318	1.9448	2.0989	1.8763	2.6453	2.0913	0	1.7761	0.911273	0.372026	0	0	0	1.3108	1.1403	0.9275	1.4431	0.688814	0.663327	0.250714	0	0
	163	0.3463	361.967				Unidentified	4	3.6653	3.0488	3.6091	3.5639	3.9108	2.0483	0.9364	1.7361	2.81484	1.09876	0.415292	3.1898	3.0588	2.156	1.4038	0	0.4546	1.7105	1.32679	0.54166	4.0213	3.5063	1.595	1.6838	0	0.4183	1.87078	1.6137	0.658792	2.373	1.2887	1.0314	2.2935	1.6072	0.9218	0.444	1.4228	0.715918	0.270591	1.7958	2.0213
	164	0.3463	399.148	C26H20N2O;C22H28O2;C19H26N2S;C16H24N2O4;	Na;KCl;HCOOK;Na_HCOONa;	4.35928	XE991; Docosatetraynoic acid; Docosatetraynoic acid; Etonogestrel; Pergolide; bestatin; Diacetolol; Ubenimex	3	1.892	1.4643	1.8494	0	0	0.464	0	0	0.708713	0.873517	0.330159	2.1511	2.1378	0	0.5399	0	0	0.8048	1.05856	0.432153	0.9215	0.6791	0	0	0	0	0.266767	0.420322	0.171596	0	0	0.7612	2.0175	0	0	0.333	0.444529	0.750265	0.283573	0.2516	1.4453
	165	0.3485	389.996	C13H12ClN5;	NaClx2;	1.1282	tetcyclacis	3	2.48	2.151	1.6512	1.5367	2.5848	2.0739	1.4449	1.1048	1.87841	0.524842	0.198372	1.9859	1.8699	1.1984	0	0	0	0.842367	0.961145	0.392386	2.3435	2.3391	0.9079	0	0	0	0.93175	1.14706	0.468285	3.4386	1.6577	2.8755	2.3992	0	1.3913	1.4431	1.88649	1.13307	0.428259	1.426	1.6759
	166	0.3493	461.019	C12H19ClN4O7P2S;C12H22N2O8S2;C16H16N4O3S;C9H19O11P;C16H14O8;	H;KCl;NaClx2;NaCl_HCOONa;NaCl_HCOONa;	0.21691	Cocarboxylase; Piposulfan; 7-Methoxy-8-[1-(Methylsulfonyl)-1h-Pyrazol-4-Yl]Naphthalene-2-Carboximidamide; 2-(alpha-D-Galactosyl)-sn-glycerol 3-phosphate; 2-(beta-D-Glucosyl)-sn-glycerol 3-phosphate; alpha-D-Galactosyl-(1,1')-sn-glycerol 3-phosphate; sn-glycero-3-Phospho-1-inositol; 6-Methoxytaxifolin	3	1.1814	1.3516	0.9236	1.0038	1.4705	0.1856	0.1445	0.1578	0.80235	0.557501	0.210716	0.935	1.2582	0.7682	0.5399	0	0.296	0.632883	0.45239	0.184687	0.7974	0.7999	0.6716	0.4386	0	0	0.45125	0.373455	0.152462	0.7963	0	0.5797	0.8569	0.3082	0	0.222	0.394729	0.355439	0.134343	0.8841	0.6792
	167	0.3497	481.921				Unidentified	4	1.5697	1.3945	1.3095	1.4497	1.1123	0.5227	0	0	0.9198	0.651063	0.246079	1.3853	1.51	0.982	0	0	0	0.646217	0.729096	0.297652	1.132	1.0837	0.4345	0.5848	0	0	0.539167	0.498479	0.203503	0.7359	0.556	0	0.4837	0.4548	0	0.444	0.382057	0.278943	0.105431	0.4017	0.7042
	168	0.3499	410.01	C17H14BrN3O3;C15H16Cl3N5;C15H13NO3S2;	Na;K;Na_HCOONa;	0.780469	CRA_9678; Sipatrigine; Epalrestat	3	0.5213	1.0459	0.8454	1.5522	1.9398	1.7632	1.1559	1.5764	1.30001	0.487305	0.184184	1.0969	2.1526	1.0046	0	0	0	0.709017	0.875199	0.357299	1.7771	2.7033	1.4368	1.5561	1.9012	0	1.56242	0.885375	0.361453	3.118	2.8309	1.7485	2.6089	4.4392	1.8711	1.9982	2.65926	0.939708	0.355176	3.3449	1.6861
	169	0.3502	170.034	C7H8FN;	Na_Na;	4.29325	Fluoro-Methyl-Aniline; Fluorobenzylamine	3	10.7959	9.3148	11.1436	15.7241	16.3121	11.6897	9.8322	12.6475	12.1825	2.58582	0.977347	13.9009	17.0212	11.2751	15.0558	13.9078	12.8824	14.0072	1.946	0.794449	12.1417	11.5965	10.7931	10.9675	13.2059	0	9.78412	4.87235	1.98913	12.0374	13.9213	12.3351	15.8742	14.0242	15.0625	17.776	14.433	2.00906	0.759355	16.2814	13.761
	170	0.3504	701.087	C27H30O17;	KCl;	1.09829	Delphin; delphinidin 3-O-sophoroside; delphinidin-3,5-diglucoside; quercetin 3,7-O-diglucoside; Quercetin 3-O-beta-D-glucosyl-beta-D-glucoside	3	0.5525	0.4351	1.5033	1.3767	1.0407	0	0	0	0.613537	0.623517	0.235667	0.377	0.2284	0.1598	0.5399	0	0.296	0.26685	0.185303	0.0756496	2.046	1.8749	0	0	0	0	0.653483	1.01382	0.413889	0.5595	0.3182	0.3364	0.4985	0.7162	0	0	0.346971	0.272695	0.103069	0.2451	0.7117
	171	0.3507	378.943	C6H12O12S2;C12H7ClN2O3;C9H10O7S;	K;NaClx2;NaClx2;	0.95002	Di-Sulfo-Glucopyranose; Quazolast; Homovanillic acid sulfate	3	2.5086	2.1879	1.9962	2.6633	2.4432	0	0	0	1.4749	1.23777	0.467834	2.0606	1.962	1.1185	0	0	0	0.85685	0.994123	0.405849	2.149	1.7984	0.7555	0	0	0	0.783817	0.973346	0.397367	1.2223	0.9893	0	1.1584	1.1703	0	0.222	0.680329	0.576423	0.217867	1.0186	1.2647
	172	0.3508	339.984	C6H10NO8P;C7H14NO5P;C7H13Cl2NO2;	HCOOK;NaClx2;NaCl_HCOONa;	4.29431	Phosphonacetyl-Aspartic Acid; Sparfosate; Selfotel; Bis(chloroethyl)-alanine	3	1.9228	1.9651	1.3905	1.9115	1.7432	0	0	0	1.11664	0.941868	0.355993	1.5264	1.9363	0.7245	0	0	0	0.697867	0.858131	0.350331	1.6159	1.8196	0.279	0	0.7605	0	0.745833	0.805068	0.328668	1.2679	0	0.4229	0.8654	1.045	0.9275	0	0.646957	0.509532	0.192585	1.4419	1.1176
	173	0.3511	723.076	C27H26O18;	HCOOK;	1.86702	Luteolin 7-O-[beta-D-glucuronosyl-(1->2)-beta-D-glucuronide]; luteolin 7-O-beta-D-diglucuronide	3	0	0.3226	0.2183	0.7599	0.3167	0	0.4335	0	0.256375	0.264999	0.10016	0.4055	0	0	0	0	0	0.0675833	0.165545	0.0675833	1.2693	0.8953	0	0	0	0	0.360767	0.571274	0.233222	0.4321	0.2617	0	0.3841	0.2925	0	0	0.195771	0.191486	0.0723749	0	0.3173
	174	0.3513	237	C6H8N2O4S2;C5H6N2O;	H;NaCl_HCOONa;	3.92404	Benzenedisulfonamide; Imidazole-acetaldehyde; Acetylimidazole	3	3.9645	4.384	4.2616	4.2784	4.9243	1.2992	0	0	2.889	2.08973	0.789843	3.9442	4.838	1.1185	0	0	0	1.65012	2.18525	0.892126	3.7979	3.4114	1.4271	0	0	0	1.4394	1.77015	0.722659	2.6535	1.8322	1.0995	2.8586	2.9674	0	0	1.63017	1.28982	0.487505	2.6573	3.7513
	175	0.3515	104.107				Unidentified	4	1.4416	1.5166	1.5323	2.1944	1.6228	1.6252	0	1.1584	1.38641	0.630323	0.23824	1.8516	0	1.6521	0	2.1056	1.9997	1.26817	0.994055	0.405821	1.6082	1.4199	1.7912	1.7543	0	0	1.0956	0.858645	0.35054	0	1.8322	1.8759	2.5448	0	1.9598	2.3312	1.50627	1.06029	0.400752	3.3302	2.5384
	176	0.3515	431.997	C9H15N3O10P2;C9H12N3O7P;	Na_Na;NaCl_HCOONa;	4.37504	Pyrimidinedione, [Deoxy-[Hydroxy(Phosphonoamino)Phosphinyl]-Erythro-Pentofuranosyl]-; dCDP; Cyclic CMP;	3	0.3305	0.4156	0.6869	2.0339	1.4895	1.4848	0	1.4987	0.992487	0.725025	0.274034	0.8227	0.8893	1.1185	2.5348	0	0	0.894217	0.932331	0.380622	1.0981	2.205	1.4006	0.731	0.9506	1.2548	1.27335	0.512549	0.209247	2.2989	2.1996	2.791	1.8595	3.6052	2.9371	3.1083	2.68566	0.600954	0.227139	1.0353	1.2993
	177	0.3517	203.055	C8H10O6;C7H8N4O2;C6H6N4;	H;Na;HCOONa;	2.75788	homo-aconitate; Dimethylxanthine; Theobromine; Theophylline; Deazaadenine; Methylpurine; Dihydropteridine	3	4.815	3.9136	4.7396	4.8781	5.6867	9.1583	0	9.8955	5.38585	3.08996	1.1679	4.8309	5.8555	8.3822	7.0671	8.6189	8.7239	7.24642	1.62223	0.662274	4.8811	7.2593	10.0353	7.619	6.5473	7.3197	7.27695	1.67333	0.683133	6.1915	8.1231	6.8573	3.9095	6.6283	5.846	6.9443	6.35714	1.29529	0.489575	3.9754	4.8362
	178	0.3525	258.983	C11H6Cl2N2;C6H8N2O4S2;	Na;Na;	4.55632	Fenpiclonil; Benzenedisulfonamide	3	1.9098	2.2204	1.2855	2.4644	2.9685	1.392	0.5779	0.7892	1.70096	0.833544	0.31505	1.7407	1.924	0.9587	0.3239	0	1.0359	0.9972	0.756633	0.308894	2.4368	2.5311	0.8395	0.4386	0.7605	0	1.16775	1.0619	0.433517	1.3065	1.8322	0.9521	1.5209	1.7817	0	0.6661	1.15136	0.661099	0.249872	1.616	1.6301
	179	0.3528	104.994				Unidentified	4	1.9798	1.6735	1.5993	1.974	2.9602	0.9951	0	0	1.39774	1.02108	0.385934	1.7741	2.2058	1.1984	0	0	0	0.86305	0.998	0.407432	0	1.5044	0	0	0	0	0.250733	0.614169	0.250733	1.6621	1.6079	0	1.3815	1.63	0.6183	0	0.985686	0.763176	0.288453	1.6774	1.4765
	180	0.3536	333.968				Unidentified	4	1.5136	1.8605	1.9221	1.7207	2.6734	2.2655	1.0114	1.1048	1.759	0.55782	0.210836	1.3154	1.9341	2.2371	0.9124	1.2498	0	1.2748	0.789863	0.32246	1.774	3.1932	2.2055	0	0	0	1.19545	1.38804	0.566664	2.289	3.2281	2.5262	1.6819	1.8815	0.9888	0	1.79936	1.05866	0.400137	1.6011	1.6299
	181	0.3539	404.841	C10H6Cl4O4;	KCl;	2.86532	Dacthal	3	0	0	0	1.0705	0.9513	0	0	0	0.252725	0.469039	0.17728	0	0	0	0	0	0	0	0	0	0	1.0133	0	0	0	0	0.168883	0.413678	0.168883	0	0	0	0	0	0	0	0	0	0	0	0.5656
	182	0.3557	404				Unmatched Adduct	4	0.6487	0.7474	0.8983	1.231	1.2217	0	0	0	0.593388	0.531494	0.200886	0.6399	1.7457	0	0	0	0.8879	0.545583	0.701333	0.286318	1.1383	2.1504	0	0	0.7605	0	0.674867	0.867829	0.35429	2.5621	1.2025	0	1.5139	2.2235	1.0821	0.7771	1.33731	0.866234	0.327406	2.2687	1.3007
	183	0.3577	679.106	C32H26O14;	Na_Na;	4.25559	Actinorhodine	3	1.6478	1.9308	2.7967	4.7487	2.7047	0	0	0	1.72859	1.69984	0.642479	1.0331	0.4559	0	0	0	0	0.248167	0.425587	0.173745	6.6248	4.0449	2.3456	0	0	0	2.16922	2.73927	1.1183	0.6148	0.5235	0	0.8261	0.8346	0	0.6141	0.487586	0.352129	0.133092	0.2516	0.8175
	184	0.3578	348.021	C8H12N5O5P;C15H15NO2S;C14H14ClNS;C11H11NO4;	NaCl;KCl;HCOOK;NaCl_HCOONa;	1.09188	PMEG; Armodafinil; Modafinil; Ticlopidine; Hydroxyindolelactate	3	1.893	1.6545	2.3236	3.5513	2.4111	0	1.4449	0	1.6598	1.20673	0.4561	1.6096	2.1487	1.4095	0	0	0.8879	1.00928	0.879871	0.359206	3.1232	2.5507	2.0597	0	0	1.2944	1.50467	1.31104	0.535231	4.1081	2.7567	1.8811	3.529	4.1534	1.5459	2.5533	2.9325	1.03531	0.391312	3.1042	3.3985
	185	0.3579	388.026	C16H12FN3O3;	KCl;	0.541201	Flubendazole; Flunitrazepam; Flunitrazepam	3	4.7524	3.9868	4.837	9.1649	8.267	4.7244	0	2.0518	4.72304	2.98301	1.12747	3.8063	7.8813	3.6788	5.6336	0	0	3.5	3.11043	1.26983	7.4829	8.1224	5.9613	1.6081	1.5209	0	4.11593	3.48591	1.42312	9.1517	6.512	4.7147	8.7858	11.9878	2.3188	4.5515	6.86033	3.31487	1.2529	9.5827	9.0371
	186	0.3591	142.951				Unidentified	4	1.946	2.408	1.8494	1.6209	3.2623	3.2481	1.0114	1.7361	2.13528	0.791699	0.299234	1.7825	2.1485	1.2961	0	1.1844	1.4799	1.31523	0.733091	0.299283	3.3816	3.8511	3.1061	1.9545	2.2398	1.8822	2.73588	0.822576	0.335815	1.9266	2.1732	1.1512	1.6961	1.9955	1.2367	1.5542	1.67621	0.386378	0.146037	2.2029	1.4747
	187	0.3593	527.12	C19H28N4O9S;C21H22N4O6S;C22H26N4O4;	K;HCOONa;NaClx2;	0.663984	(Acetyloxy)Methyl-(Glycylamino)-Oxido-Oxoheptanoyl-Amino-Oxo-Thia-Azabicyclo-Octane-Carboxylate; ICI D1694; Raltitrexed; N-Dimethylcarbamoyl-Phenyl-Ethyl-Oxo-N-(Pyridinyl-Ethyl)-Succinamide;	3	1.0811	1.6735	1.4254	2.022	1.5732	0	0	0	0.9719	0.845819	0.31969	1.554	1.3783	0	0	0	0	0.488717	0.759153	0.309923	1.843	1.5102	0	0	0	0	0.558867	0.872165	0.35606	1.9597	1.2013	0	2.1483	1.8815	0	0	1.02726	1.00432	0.379598	1.901	2.6856
	188	0.3595	175.119				Unidentified	4	15.5122	14.9404	14.5389	15.7926	13.9735	17.0462	20.2526	20.1536	16.5263	2.44544	0.92429	13.1733	16.8594	15.2248	16.2393	19.439	10.0227	15.1598	3.24671	1.32546	13.9544	15.13	15.1142	14.8326	11.9473	21.4217	15.4	3.18585	1.30062	13.7971	12.8222	5.3204	16.7375	17.0252	16.6102	17.4553	14.2526	4.315	1.63092	13.5503	14.1618
	189	0.3604	382.017	C16H10ClF4NO2;C10H17NO9S2;	Na;Na;	4.16206	BMS 204352; Flindokalner; propenyl-glucosinolate; Sinigrin	3	1.5676	1.7258	1.321	1.7531	1.5147	0	0	0	0.985275	0.826554	0.312408	1.3425	1.6568	0	0	0	0	0.499883	0.780768	0.318747	1.572	1.635	0	0	0.7605	0	0.66125	0.787307	0.321417	2.3953	2.1812	2.9601	3.0949	2.283	0	0.6661	1.94009	1.16504	0.440345	2.1848	2.3704
	190	0.3609	657.125	C20H32N6O12S2;	Na_Na;	4.23054	Glutathione disulfide; Oxidized glutathione; Oxiglutatione	3	3.2522	4.0461	4.9864	4.8644	4.3066	0	0	0	2.68196	2.28278	0.862811	1.3722	1.2399	0	0	0	0	0.43535	0.675738	0.275869	10.9744	6.0867	4.722	0	0.8259	0	3.76817	4.3651	1.78204	1.7112	1.1342	0	2.4979	1.3811	0	0	0.960629	0.991792	0.374862	0.5176	1.3843
	191	0.3615	681.124	C18H37N4O14P;	NaClx2;	4.6981	Kanamycin A 3'-phosphate	3	0.5352	0.6082	0.7113	0.5221	0.7228	0	0	0	0.38745	0.328717	0.124243	0.6294	0.7027	1.7433	0	0	0	0.512567	0.685956	0.28004	0.305	0.5955	0.6166	0	0	0	0.25285	0.298075	0.121688	0.6307	1.4387	1.4043	1.3726	1.0363	0	0	0.840371	0.639541	0.241724	0.5349	1.0676
	192	0.3625	147.073	C5H10N2O3;C5H7NO3;	H;NH3;	1.90377	Glutamine; Iso-glutamine; 3-Ureidoisobutyrate; Alanylglycine; N-methyl-N-carbamoyl-D-alanine; Pyrroline-hydroxy-carboxylate; Oxoproline; Dimethadione (USAN/INN); N-Acryloylglycine; Pyrrolidonecarboxylic acid;	3	1.484	1.2028	1.3151	0	1.1044	0	0	0	0.638288	0.69064	0.261037	0.9834	1.0548	1.2624	0	0	0	0.5501	0.609536	0.248842	1.4372	1.1606	1.2592	0	0	0	0.642833	0.709748	0.289753	0.8165	0	1.0606	0	0	0	0	0.268157	0.463355	0.175132	0	0
	193	0.3635	192.025	C7H7NO4;C6H5NO2;	Na;HCOONa;	4.32233	Isonicotinic acid; Nicotinate; Nitrobenzene; Picolinic acid;dihydrodipicolinate; Furoylglycine; Dihydroxyanthranilate; Methylpyrrole-dicarboxylic acid	3	3.1141	3.0092	3.0805	3.4055	4.6685	4.1405	2.0228	4.4193	3.48255	0.876286	0.331205	3.7651	4.5615	3.9726	3.1315	0	1.8461	2.87947	1.68708	0.688748	3.8586	4.2578	3.3655	0	4.2153	2.9279	3.10418	1.60436	0.654978	3.8131	0	2.927	4.7032	4.4963	2.9371	0	2.69667	1.96495	0.742681	5.0315	3.7829
	194	0.3635	493.993	C19H12F3N3O3S;C9H15N3O11P2;C15H14ClN3O4S;	KCl;Na_HCOONa;NaCl_HCOONa;	0.465594	Zopolrestat; CDP; Cefaclor	3	2.6287	2.3075	2.5815	3.4456	2.9538	2.9149	1.1559	0	2.24849	1.1265	0.425777	3.4943	3.7148	3.1089	8.0596	0.7896	0	3.19453	2.82933	1.15507	0	1.9735	1.2764	0	0	0	0.54165	0.867593	0.354193	5.0003	5.5434	4.8576	3.4853	6.0363	0.7729	6.2495	4.56361	1.90527	0.720126	2.9185	2.8273
	195	0.3636	337.175	C17H21NO5;C18H28O3;C14H24N2O3;	NH3;Na_Na;HCOONa;	4.80463	Epideacetylbowdensine; Proquinolate; Hydroxy-octadecadienynoic acid; Oxophytodienoic acid; Pentenyloxiran-ylidene}undecenoic acid; Oxooctadeca-trienoic acid; OPDA; Epoxylinolenate; Oxo-phytodienoate; keto-octadecatrienoic acid; Hydroxy-oxa-androstanone; hydroxy-octadecadiynoic acid; EOT; 9r,13r-Opda; Colnelenic acid; Etherolenic acid; Ciclopirox olamine	3	4.4211	3.3693	3.9361	3.8375	4.2594	3.1553	2.8897	2.8565	3.59061	0.607804	0.229728	2.4693	2.2034	1.9175	1.4038	0	0	1.33233	1.0908	0.445316	5.6293	4.2092	2.461	0	1.1407	0	2.24003	2.30901	0.942649	2.7288	2.4936	2.4998	2.8569	3.1492	1.5459	0	2.18203	1.08427	0.409814	1.7008	3.0726
	196	0.364	366.043	C11H21NO6S2;C10H16N3O7P;C16H20BrNO;C14H17N3O2S;C10H13N3O4;	K;Na_Na;Na_Na;KCl;NaCl_HCOONa;	0.601021	Methylthiopropyl-desulfoglucosinolate; Deoxy-methylcytidylate; Phosphoric Acid Mono-[Amino-(Methyl-Dioxo-Dihydro-2h-Pyrimidinyl)-Tetrahydro-Furanylmethyl] Ester"; Quindonium bromide; Fasudil; Amino-(Pentahydro-Dioxo-Cyclopenta[E]Pyrimidinyl) Proionic Acid	3	8.4915	9.6611	9.6923	12.105	13.2308	11.224	0	0	8.05059	5.1886	1.9611	5.8176	10.9824	8.1782	5.5961	2.6933	0.9414	5.7015	3.62641	1.48048	11.0343	13.9154	9.7171	0	1.1407	0.8365	6.10733	6.13221	2.50346	15.2217	9.0607	12.0434	17.0333	16.6991	1.7005	7.152	11.273	5.66155	2.13987	12.8344	15.5175
	197	0.3652	262.91	C3H6O2Te;C6H5I;	NaCl;NaCl;	3.00483	[Methyltelluro]Acetate; Iodophenyl	3	0.5946	0.6799	1.1096	1.2845	1.8599	0.8352	0	0	0.795463	0.631514	0.23869	0.9706	1.4965	0	0	0	0	0.411183	0.658353	0.268772	1.9514	1.9901	2.0147	0	0	0	0.9927	1.08764	0.444025	0.871	0.6314	0.6121	0.7523	0.9122	0	0	0.539857	0.385123	0.145563	0.8039	0.7226
	198	0.3652	368.023	C17H11NO5;C14H15NO6;C12H9ClFN5;C15H13N3O;	NaCl;KCl;Na_HCOONa;NaClx2;	1.60313	Oxo-dibenzo[b,d]pyranyl)maleamic acid; Dideoxypancratistatin; Arprinocid; (Hydroxy-Phenyl)-1h-Indole-Carboxamidine;	3	1.6323	1.148	1.3648	1.5213	1.6252	0	0.4335	0.3157	1.0051	0.655351	0.247699	1.5581	1.4982	3.3116	0	0	0.592	1.15998	1.25826	0.513682	0	1.4128	1.5284	0	0.5703	0	0.58525	0.721408	0.294514	2.4478	3.1668	2.8279	1.8628	2.2918	0.7729	0	1.91	1.14021	0.430957	1.7477	1.5961
	199	0.3655	382.872				Unidentified	4	0.973	1.0156	0.5284	1.0169	1.5668	0.5568	0	0	0.707187	0.54188	0.204811	1.1883	1.0689	0.3995	0	0	0	0.442783	0.554592	0.226411	1.6262	1.4238	0.9044	0	0	0	0.659067	0.759402	0.310025	0.4899	0.7852	0.3383	0.2895	0.5701	0	0	0.353286	0.290441	0.109776	0.3774	0.819
	200	0.3663	258.111	C15H15NO3;C15H12O3;C9H19NOS;	H;NH3;HCOONa;	0.116228	Ismine; Tolmetin; Hydroxyflavanone; Chrysophanic acid -anthrone; Dihydroflavonol; Flavidin; Idronoxil; Butyrylthiocholine; EPTC	3	3.8195	3.8214	3.2473	3.3567	3.9949	0	0	0	2.27998	1.90402	0.719651	5.4697	5.8022	5.5062	0	0	0	2.79635	3.06542	1.25145	3.8335	4.1316	2.3432	0	0	0	1.71805	1.97718	0.807181	6.8759	7.9499	7.0015	10.163	8.5393	0	7.9521	6.92596	3.24448	1.2263	6.6029	5.6432
	201	0.3667	374.041	C11H17N3O7S;C19H13NO5;C9H19ClN3O5P;C13H17NO7;C10H18FNO8;C14H15N3O2;C11H16FN3O3;	K;K;NaCl;KCl;KCl;NaClx2;NaClx2;	1.81798	Formylglutathione; Luguine; 2-(Naphthalen-1-Yl-Oxalyl-Amino)-Benzoicacid; Fotemustine; p-aminobenzoate-beta-D-glucopyranosyl ester; Modified Ribosylated Glutamyl Ester; Indolidan; indolmycin; Carmofur	3	4.1397	4.333	4.6417	6.6269	6.9541	6.3771	8.1259	0	5.1498	2.51472	0.950476	7.6725	8.3668	6.9408	10.7963	16.3679	3.9957	9.02333	4.21796	1.72197	2.801	1.4619	2.5184	1.4619	0.7605	0	1.50062	1.05162	0.429321	10.1974	11.0201	9.7207	10.0991	11.7591	12.0304	13.0501	11.1253	1.2127	0.458357	4.7909	5.6678
	202	0.3679	331.114	C10H15BN4O6S;C11H14N4O8;C14H16N2O6;C13H16NO4PS;	H;H;Na;NH3;	2.08403	Pinacol[[Amino-(Carboxy-Methylethoxyimino)-Thiazoleacetyl]Amino]Methaneboronate; Dioxo-5h-Ribitylaminolumazine; Indicaxanthin; Isoxathion	3	2.7634	2.1907	2.0593	2.6059	5.0479	1.392	0	1.2626	2.16522	1.46261	0.552813	1.6314	0	0.8788	1.4555	0	0	0.66095	0.765651	0.312576	2.6937	2.9148	2.8542	0	1.3308	0	1.63225	1.3917	0.568159	0	0	0	0	0	0	0	0	0	0	0.7963	0
	203	0.3686	98.9856				Unidentified	4	0	0	0.9511	0	0	0	0	0	0.118887	0.336265	0.127096	2.2912	2.3249	2.8075	0	0	0	1.23727	1.36761	0.558326	0	0	0	0	0	0	0	0	0	1.9853	3.4026	3.5521	2.0546	1.747	0	0	1.82023	1.42696	0.53934	1.2324	2.4378
	204	0.3688	673.121	C24H30N4O9S2;C27H30O12;	Na_HCOONa;NaCl_HCOONa;	3.0455	Ampicillin - sulbactam mixt; Flavonol O-[rhamnosyl-glucoside]	3	3.4778	2.107	2.3945	4.1576	3.622	0	0	0	1.96986	1.75783	0.664398	3.6715	5.2763	5.1165	0	0	0	2.34405	2.62794	1.07285	2.2085	2.2854	1.3992	0	0	0	0.982183	1.11984	0.457172	5.3031	6.1703	6.1143	5.0738	4.6921	0	0	3.90766	2.72185	1.02876	3.7988	3.0168
	205	0.3691	687.11				Unidentified	4	2.9091	2.3546	3.6488	2.4213	2.3672	0	0	0	1.71263	1.4795	0.559198	4.7228	3.7599	0	0	0	0	1.41378	2.21129	0.902755	1.9695	1.6848	0	0	0	0	0.60905	0.947822	0.386947	3.4793	0	0	3.8693	2.0762	0	0	1.3464	1.76532	0.667227	3.2038	5.2375
	206	0.3698	352.058	C15H17NO4S;	Na_Na;	3.06768	Hydroxy-acetyl-cysteinyl-dihydronaphthalene; Acetyl-cysteinyl-hydroxy-dihydronaphthalene; NAC-Diketide	3	5.5973	6.9205	5.4686	5.9747	5.4695	8.795	0	0	4.7782	3.14968	1.19047	9.6042	8.6335	12.4299	9.8191	8.1457	8.2883	9.48678	1.59682	0.651898	2.8367	1.9949	0	0.6491	0	0	0.91345	1.21996	0.498045	10.0993	10.5578	10.9156	11.756	10.3633	11.2884	12.676	11.0938	0.896423	0.338816	4.7601	7.3886
	207	0.3707	695.093	C29H27ClN2O14S;	H;	3.35207	Meclocycline sulfosalicylate	3	1.6991	1.1087	1.7197	1.6283	1.5641	1.7979	0	0	1.18972	0.763467	0.288563	1.1118	1.5821	2.0684	1.258	0	0	1.00338	0.84372	0.344447	1.2163	1.3563	1.0081	0	0	0	0.596783	0.663068	0.270697	2.2987	2.1371	2.0774	3.6767	2.8974	0	1.1903	2.03966	1.18147	0.446555	1.2375	1.8516
	208	0.3723	709.1	C24H30N4O9S2;	NaCl_HCOONa;	0.0987168	Ampicillin - sulbactam mixt	3	0.5866	1.3721	0.9182	1.2241	1.5933	1.5776	0	0	0.908988	0.653084	0.246843	0.8928	1.318	0.6828	0	0	0	0.482267	0.566559	0.231297	1.0215	0.8601	1.1753	0	0	0	0.509483	0.566944	0.231454	1.2504	0.7852	1.4129	3.2528	1.5269	0	0	1.17546	1.1118	0.42022	1.8846	2.3598
	209	0.3727	184.075				Unidentified	4	19.5951	17.8975	20.3585	20.244	24.2673	17.528	15.0009	15.0412	18.7416	3.0707	1.16062	23.634	24.7947	20.5548	20.3305	16.5213	15.4743	20.2183	3.7124	1.51558	23.3995	17.1385	18.0628	14.9433	17.5017	16.8192	17.9775	2.8595	1.16739	30.937	30.118	30.1745	34.9293	34.259	19.7487	23.737	29.1291	5.51308	2.08375	23.4399	28.4408
	210	0.3729	273.11	C16H16O4;C12H18N4O;	H;K;	0.695687	Vestitol; Bis(hydroxy-methoxyphenyl)ethylene; Dihydroxy-methoxydihydrochalcone; 5C-aglycone; O-Methylalloptaeroxylin; Dihydroxy-methoxy-isoflavanol carbocation intermediate 2; Methoxy-lapachone; Eleutherin; Vestitol; Benzoylagmatine	3	2.4011	2.1059	2.8849	2.6907	2.8922	1.4848	0	0	1.80745	1.20695	0.456183	2.6605	2.0605	0	0	0	0	0.786833	1.23364	0.50363	3.2219	2.7666	2.3831	0	0	0	1.39527	1.55134	0.633332	0.8305	0.8016	1.0967	0.9585	1.3553	0	0	0.720371	0.525684	0.19869	0.771	1.2133
	211	0.373	114.067				Unidentified	4	9.2543	8.4811	9.2663	10.8193	11.1685	10.6999	11.7611	11.6959	10.3933	1.2345	0.466599	8.3462	9.6205	7.7086	10.0938	10.7315	7.8215	9.05368	1.26856	0.517888	11.1618	12.4699	10.6321	17.6185	20.5999	17.0259	14.918	4.0618	1.65822	13.6457	15.0925	6.449	10.7014	14.6666	13.0341	13.402	12.4273	2.98996	1.1301	14.3101	9.4357
	212	0.3735	635.142	C20H32N6O12S2;	Na;	2.8655	Glutathione disulfide; Oxidized glutathione; Oxiglutatione	3	9.368	8.9946	12.2123	14.3005	13.8668	10.9623	12.5548	10.3296	11.5736	1.98216	0.749184	4.5213	4.8971	4.1775	2.6995	0	0	2.7159	2.23185	0.911151	21.7911	20.824	16.5187	17.2431	16.1313	22.9611	19.2449	2.96381	1.20997	3.3474	4.3944	5.082	5.8732	4.4883	0	3.1799	3.76646	1.9057	0.720288	3.0017	4.2656
	213	0.3736	291.121	C16H18O5;C15H16N4O;	H;Na;	2.33579	O-Methylvisamminol; Ripazepam	3	3.8097	2.6632	2.8584	3.3964	3.6002	2.4954	0	0	2.35291	1.52181	0.57519	2.3333	2.551	2.4155	0	0	0	1.21663	1.33457	0.544835	4.627	3.9122	2.989	0	0	0	1.92137	2.16789	0.885036	1.9991	0	1.4565	1.5554	1.9872	0	0	0.999743	0.956524	0.361532	1.1928	1.6957
	214	0.374	332.098	C18H15NO4;C15H10N2O6;C9H17N3O4S;C14H17NO3;	Na;NH3;HCOONa;HCOOK;	2.04765	Aminaphtone; Lunamarine; Lomofungin; Triampyzine sulfate; Fagaramide	3	3.927	4.445	4.9115	4.5664	5.1885	6.056	0	0	3.6368	2.32807	0.879928	4.4247	5.729	7.2546	0	0	0	2.90138	3.30214	1.34809	2.7835	3.6755	3.5939	1.6081	0	0	1.9435	1.67905	0.685471	5.8842	8.7154	7.8457	7.9941	6.0596	0	0	5.21414	3.70698	1.40111	3.5423	5.6567
	215	0.3744	659.141	C28H30O13;C29H30Cl2F2N4O2;	HCOOK;HCOOK;	4.14176	Steffimycin; Mioflazine	3	1.1302	1.5684	1.0467	1.6899	1.8403	1.6197	0	0	1.1119	0.737576	0.278778	1.3409	2.1279	2.8354	0	0	0	1.0507	1.24432	0.507991	1.5424	0.8318	0.8004	0	0	0	0.5291	0.637471	0.260247	2.7596	2.9011	3.62	2.0769	2.4421	0	1.9982	2.25684	1.13673	0.429645	0.8235	0.5625
	216	0.3751	248.115	C10H18ClN3O2;C14H15N3;	H;Na;	2.53914	Methyl-CCNU; Semustine; Dimethylamino)azobenzene; Cyprodinil	3	2.6554	1.8685	0	2.1145	2.8192	1.9826	0	0	1.43003	1.22663	0.463623	2.5245	2.7366	2.3913	0	0	0	1.2754	1.40147	0.572146	2.9947	3.3119	2.0572	0	0	0	1.39397	1.58178	0.645759	3.2601	0	3.1574	3.5292	3.5305	0	2.025	2.2146	1.59617	0.603296	1.7794	3.3918
	217	0.3757	225.089	C15H12O2;C7H13NO4S;	H;NH3;	2.71002	Flavanone; Methoxy-hydroxyanthracene; Hydroxychalcone; Isoflavanone; Hydroxyethyl-acetyl-cysteine	3	0.7695	0.8287	1.2153	0.7121	0	0.7424	0	0	0.5335	0.468599	0.177114	1.0336	0.9868	0.5038	0	0	0	0.4207	0.496787	0.202812	1.6882	1.3474	1.2959	0	0	0	0.721917	0.802232	0.32751	0	0.4943	0	0	0	0	0	0.0706143	0.186828	0.0706143	0	0.5881
	218	0.3757	651.121	C29H33FO9S;	KCl;	2.82588	Dexamethasone metasulfobenzoate	3	2.3941	3.5068	3.1262	2.8798	3.6677	0	0	0	1.94683	1.65731	0.626404	2.9981	2.9524	0	0	0	0	0.99175	1.53648	0.627266	4.6363	3.5462	0	0	0	0	1.36375	2.14065	0.873917	3.6088	4.056	2.7352	3.4475	0	0	0	1.97821	1.89067	0.714607	2.5158	3.0366
	219	0.376	135.005				Unidentified	4	0	0	0	0	0	5.2208	12.1121	13.2308	3.82046	5.76004	2.17709	0	0	0	8.1502	12.1183	11.1969	5.24423	5.89301	2.40581	0	0	4.9981	12.7032	14.5782	13.9008	7.69672	6.88	2.80875	0	0	2.8755	0	0	11.6133	9.509	3.42826	5.02142	1.89792	0	0
	220	0.377	266.126	C14H17N3O;C13H21NO;	Na;NaCl;	4.92246	Frovatriptan; Luciduline	3	1.6817	1.7927	1.5426	1.8868	1.5255	0	0	0	1.05366	0.880506	0.3328	1.8783	2.022	1.518	0	0	0	0.90305	1.00278	0.409383	2.2847	1.398	1.6528	0	0	0	0.88925	1.01601	0.414786	2.4517	1.7449	0.9801	1.4103	2.0752	0	1.3321	1.42776	0.797555	0.301447	1.4045	1.8216
	221	0.3772	665.128				Unidentified	4	4.0404	3.5233	3.3281	1.7742	1.6764	0	0	0	1.7928	1.69283	0.639831	4.5212	2.618	0	0	0	0	1.18987	1.9391	0.791633	1.3898	0	0	0	0	0	0.231633	0.567383	0.231633	3.2847	4.228	3.6855	4.4159	1.6369	0	0	2.46443	1.9111	0.722329	3.8582	7.7109
	222	0.3777	309.13				Unidentified	4	2.2651	3.9246	10.8631	10.7335	9.7	6.7584	0	0	5.53059	4.61078	1.74271	2.9918	0	0	0	0	0	0.498633	1.2214	0.498633	7.9029	6.1674	0	0	0	0	2.34505	3.67416	1.49997	0	0	0	0	0	0	0	0	0	0	0	0
	223	0.3804	369.011	C10H12N4O4;C7H15O7P;C9H11ClN4O2;C14H10O4;	NaClx2;NaCl_HCOONa;NaCl_HCOONa;NaCl_HCOONa;	0.894283	Deoxyinosine; Nebularine; Purine Riboside; 2-Deoxy-D-Glucitol 6-(E)-Vinylhomophosphonate; 5-Chloro-6-[(2-Iminopyrrolidin-1-Yl)Methyl]Pyrimidine-2,4(1h,3h)-Dione; 2-Hydroxy-2H-benzo[h]chromene-2-carboxylate; 3-(2-Carboxyvinyl)naphthalene-2-carboxylic acid; 4-(3-Hydroxy-2-naphthyl)-2-oxobut-3-enoic acid; Benzoyl peroxide (USP); cis-4-(1'-Hydroxynaphth-2'-yl)-2-oxobut-3-enoate; Cyperaquinone	3	0	1.7556	1.5761	0	0.8143	2.6366	1.2993	0	1.01024	0.978666	0.369901	0.561	0	1.6929	0.8639	0	1.0359	0.692283	0.651844	0.266114	0	0	2.0857	7.3286	1.1407	0	1.75917	2.85628	1.16607	1.9679	2.5795	1.7201	0	1.8023	0	0	1.15283	1.11283	0.420611	0	0
	224	0.3819	90.0552	C3H7NO2;C3H4O2;	H;NH3;	3.77546	Nitropane; Alanine; Sarcosine; Urethane; Malondialdehyde; Methylglyoxal; Propenoate; Propiolactone	3	37.0018	36.1498	35.9119	41.8438	43.6007	32.0141	39.5857	38.2931	38.0501	3.65149	1.38013	40.2785	39.9589	30.0498	35.8808	35.3478	30.0659	35.2636	4.51183	1.84195	32.8704	37.5157	28.5387	34.9892	41.2148	34.0818	34.8684	4.28895	1.75096	45.9588	46.4912	36.3142	51.4772	49.1918	39.2133	43.394	44.5772	5.36851	2.02911	44.5071	40.1769
	225	0.3828	472.003	C12H19N3O8S2;	KCl;	4.68217	Taurinomethyl-thiouridine	3	2.5642	0	0	2.248	0	5.055	7.8332	9.6849	3.42316	3.75297	1.41849	2.6032	3.8936	3.8419	7.7701	7.5378	8.3255	5.66202	2.48408	1.01412	2.7785	2.5176	4.4885	0	0	1.0457	1.80505	1.77478	0.724552	3.29	3.3666	3.383	3.6693	3.6328	10.9066	8.8525	5.30011	3.18711	1.20461	2.88	1.927
	226	0.3836	360.037	C8H15N7O2S3;C10H16N3O7P;C16H20BrNO;C11H15N3O6;C16H12ClNO;C11H17NO5;C12H13N5O;	Na;K;K;KCl;Na_HCOONa;NaClx2;NaClx2;	0.1111	Famotidine; Deoxy-methylcytidylate; Phosphoric Acid Mono-[Amino-(Methyl-Dioxo-Dihydro-2h-Pyrimidinyl)-Tetrahydro-Furanylmethyl] Ester; Quindonium bromide; Acetylcytidine; (Methoxyphenyl)-(m-chlorophenyl)acrylonitrile; Carbidopa; Topolin;	3	4.8638	4.8768	4.8203	3.3162	4.7769	5.4416	0	0	3.51195	2.24981	0.85035	6.0833	4.4667	4.7353	0	0	0	2.54755	2.84397	1.16105	4.5161	5.1002	6.3366	0	0	0	2.65882	2.97133	1.21304	6.0176	9.1745	8.213	8.0856	5.5474	0	0	5.29116	3.82998	1.4476	7.5677	8.7471
	227	0.3846	226.074	C11H13N3;C7H12O5S;	K;NH3;	2.65399	Deximafen; Methylthio-ethylmalic-acid; Methyl-Thio-Manno-Hexodialdo-Pyranoside	3	0	1.232	1.1186	1.1917	0	0	0	0	0.442788	0.611877	0.231268	1.5776	1.5934	0	0	0	0	0.5285	0.818764	0.334259	1.0307	1.1909	0	0	0	0	0.370267	0.575847	0.235089	0	1.6876	0	0.9158	0	0	0	0.371914	0.673107	0.254411	0	0
	228	0.3847	292.105	C15H15N3O2;C14H13N3;C11H17N3O;	Na;HCOONa;HCOOK;	2.3964	Tacedinaline; Fadrozole; Mepanipyrim; Alchornine; Arenaine	3	11.074	11.3163	10.8226	12.9003	12.9477	10.3782	7.8332	8.9002	10.7716	1.77074	0.669276	14.252	16.3212	14.824	10.7307	11.2951	9.9879	12.9018	2.5689	1.04875	11.4292	12.2729	10.3216	8.4812	0	0	7.08415	5.63215	2.29932	17.8169	20.561	17.7931	15.7384	18.4786	9.1909	7.8322	15.3444	4.89216	1.84906	8.6608	14.7605
	229	0.3849	637.157	C28H32O14;C27H30O12;C27H31F7O2;C28H37ClO7;	Na_Na;Na_HCOONa;NaClx2;NaClx2;	4.48876	Bis-sinapoyl-glucoside; Di-sinapoyl-glucose; Methylvitexin-rhamnoside; Flavonol [rhamnosyl-glucoside]; Heptafluoro-hydroxy-hexadehydrovitamin D3; Alclometasone dipropionate; Beclomethasone dipropionate	3	2.1166	2.0203	2.537	3.0867	2.9252	2.6913	0	0	1.92214	1.24032	0.468795	2.3606	2.7118	0	0	0	0	0.8454	1.31439	0.536597	3.7987	4.063	0	0	0	0	1.31028	2.0316	0.829398	3.0668	3.7843	2.1989	2.5674	2.8006	0	0	2.05971	1.48881	0.562716	1.5395	1.0042
	230	0.385	70.0663				Unmatched Adduct	4	10.2858	8.9971	10.8416	11.4933	14.3612	9.6978	11.3883	7.6281	10.5867	1.99775	0.75508	7.5475	10.6179	6.4185	6.6509	5.217	0	6.0753	3.48992	1.42475	13.5744	15.3487	10.4201	10.4689	14.7505	13.3152	12.9796	2.10094	0.857706	6.6614	7.4724	6.2311	7.4158	7.354	0	6.5311	5.95226	2.66967	1.00904	7.5142	6.4119
	231	0.3852	511.1	C22H26N2O6S3;C18H22N6O7S;C20H24Cl2N2O5;C24H26O5;	H;Na_Na;HCOONa;NaClx2;	4.65662	Leinamycin; S-(4-Azidophenacyl)glutathione; Brasofensine maleate; Pentomone	3	0.4324	0.523	0	0	0.6155	0	0	0	0.196362	0.275389	0.104087	0.6399	1.1223	0.5593	0.5399	0.2632	0	0.520767	0.378266	0.154426	0	0	0	0	0	0	0	0	0	0.4355	0.7852	0.3383	0.5202	0.6272	0	0.5551	0.465929	0.249381	0.094257	1.0053	0.8087
	232	0.3856	116.071	C5H9NO2			Proline	1	16.2862	13.1516	14.3984	16.7419	17.5954	14.3391	12.949	13.9592	14.9276	1.72742	0.652903	9.9443	11.0228	10.4723	8.7212	9.6204	0	8.29683	4.13877	1.68965	21.0376	20.9079	14.3974	18.7581	0	15.2878	15.0648	7.88543	3.21921	8.7598	9.5126	9.5707	10.0671	10.8344	0	9.6461	8.34153	3.73122	1.41027	10.5111	9.8412
	233	0.3871	310.115				Unidentified	4	0	0	0	0	0	0	0	0	0	0	0	0	0	0	0	0	0	0	0	0	0	0	0	0	0	0	0	0	0	0	0	0	0	0	0	0	0	0	0	0	0
	234	0.3883	551.965	C16H15N7O5S4;C10H16N5O13P3;	K;Na_Na;	2.91685	Cefuzonam; 2-hydroxydeoxyadenosine 5'-triphosphate;2'-Monophosphoadenosine-5'-Diphosphate; 3'-Phosphate-Adenosine-5'-Diphosphate; ATP; dGTP	3	0	0	0	0	0	0	0	0	0	0	0	0	0	0.9587	2.9005	0	0	0.6432	1.17045	0.477834	0.5421	0	1.0074	0	0	0	0.25825	0.426279	0.174028	0	0	0.5074	0.4866	0.542	0	1.607	0.449	0.571437	0.215983	0	0
	235	0.3906	757.103	C36H32FeN4O4;C32H32O14;	NaClx2;NaClx2;	0.818911	Dedimethyl-Divinyl Heme; Chartreusin	3	0.7027	0.7844	0	0.893	1.115	1.5776	0	0	0.634087	0.588221	0.222327	0	2.4608	1.9974	0	0	0	0.743033	1.16039	0.473728	0	0.4795	0	0	0	0	0.0799167	0.195755	0.0799167	2.2319	2.7047	2.5372	2.852	2.567	0	0	1.84183	1.27222	0.480853	1.3308	1.2953
	236	0.392	194.046				Unidentified	4	0.8108	0	1.0764	0.8873	1.337	0	0	0	0.513937	0.570445	0.215608	0	2.0838	3.3721	0	0	0	0.909317	1.46643	0.598669	0.9268	1.7511	0	0	0	0	0.446317	0.738934	0.301669	2.172	3.7033	0	0	2.0519	0	0	1.13246	1.50914	0.570403	2.0999	2.9397
	237	0.3938	409.084	C19H16N4O4;C12H22N4O7;C14H16N2O8;	Na_Na;KCl;HCOONa;	3.86226	Zidometacin; ;Estrone sulfate; Deoxy-Guanidino-Acetyl-Neuraminic Acid; Vulgaxanthin-II	3	1.3514	0	0	0	0	0	0	0	0.168925	0.477792	0.180588	0	0	0	0	0	0	0	0	0	0	1.2611	0	0	0	0	0.210183	0.514842	0.210183	0	0	0	0	0	0	0	0	0	0	0	0
	238	0.3958	240.053	C11H14ClN;C7H16ClNO2;	Na_Na;NaCl;	2.20785	Lorcaserin; SK&F 86466; Acetylcholine chloride	3	0	0	0	0	1.0885	0	0	0	0.136063	0.384843	0.145457	0	1.6005	2.4342	0	0	0	0.67245	1.0746	0.438702	0	1.299	0	0	0	0	0.2165	0.530315	0.2165	0	2.9913	3.5136	0	1.9507	0	0	1.20794	1.57505	0.595311	2.1265	0
	239	0.3966	330.074	C10H17N3O6S;C18H13NO4;	Na	3.87791	Glutathione	3	25.1624	24.4635	26.7056	32.2756	37.1479	40.994	16.8977	15.9957	27.4553	8.92856	3.37468	37.2992	53.8224	60.5722	45.1451	35.0268	40.2069	45.3454	10.0137	4.08809	11.668	12.4677	10.9158	0	0	0	5.84192	6.41829	2.62026	53.3881	70.2589	71.1765	64.1027	59.1927	30.6058	54.9433	57.6669	13.8012	5.21638	36.9703	33.844
	240	0.3973	286.058	C9H13N3O4;C11H14ClN;C11H13N;	NaCl;Na_HCOONa;NaCl_HCOONa;	0.734117	Deoxycytidine; Torcitabine; Lorcaserin; SK&F 86466; Pargyline	3	0	0	0.6233	1.3913	1.2536	0	0	0	0.408525	0.604813	0.228598	0	1.3366	1.7106	0	0	0	0.507867	0.795623	0.324812	1.1364	1.911	0	0	0	0	0.5079	0.824081	0.33643	1.7864	2.6584	2.8496	0.955	1.6275	0	0	1.41099	1.15493	0.436522	0	0
	241	0.3997	304.069	C15H11N3O3;C13H13N3O3;C10H20CuN4;C11H13N3O2;C11H16ClNO;C11H15NO;	Na;Na_Na;Na_Na;HCOOK;Na_HCOONa;NaCl_HCOONa;	4.43979	Nitrazepam; Methyleneamine-Hydroxy-Benzylidine-Oxo-Dihydro-Imidazolyl-Acetaldehyde; Bemoradan; Cyclobendazole; Lenalidomide; Amino-(Amino-1h-Indolyl)Propanoic Acid; Clorprenaline; Ethylaminobenzylmethylcarbonyl Group;Phenmetrazine;Valerianine;;	3	0	0	0	1.0175	1.221	0	0	0	0.279813	0.520959	0.196904	0	0	0	0	0	0	0	0	0	1.1293	0	0	0	0	0	0.188217	0.461035	0.188217	2.1163	2.6522	2.842	0	1.5839	0	0	1.31349	1.29241	0.488484	2.3427	2.7353
	242	0.3998	489.116	C14H26N4O11P2;C25H22O9;C18H22N6O7S;C22H26O10;C17H26N4O7S;C19H21ClN4O5;C21H24O8;C22H28O5;C20H27O4P;C21H27ClO3;	H;Na;Na;K;NaCl;HCOONa;HCOOK;NaClx2;NaCl_HCOONa;NaCl_HCOONa;	4.27301	[Cytidylate-O-Phosphonyloxyl]-Ethyl-Trimethyl-Ammonium; CDP-choline; Citicoline; Silandrin; S-(Azidophenacyl)glutathione; Auriculoside; (2s,5r,6r)-6-{[(6r)-6-(Glycylamino)-7-Oxido-7-Oxoheptanoyl]Amino}-3,3-Dimethyl-7-Oxo-4-Thia-1-Azabicyclo[3.2.0]Heptane-2-Carboxylate; Theofibrate; Mallotophenone; Veraguensin; Phenyl-tetranor-PGE2; Clavulolactone; Meprednisone; Prednylidene; Pyrethrin II; Saucern…	3	0.6286	0.7322	0	0.9011	1.0088	0	0	0	0.408837	0.450988	0.170457	1.0512	1.1223	1.0319	0	1.5792	0	0.797433	0.649287	0.26507	0	0.4939	0.7555	0	0	0	0.208233	0.333032	0.13596	0.5111	1.1594	0.8457	1.1289	0.7179	0	0.7771	0.7343	0.3958	0.149598	1.397	1.5054
	243	0.3999	424.103	C22H28BrN;C23H22ClNO2;C17H25NO4;C17H19N3O2;	K;Na_Na;NaClx2;NaCl_HCOONa;	4.62152	Prifinium bromide; Licofelone; Buflomedil; Ibopamine; GA	3	0	0	0	0	0	0	0	0	0	0	0	0	0	0	0	0	0	0	0	0	0	0	0	0	0	0	0	0	0	0	5.7121	6.7585	0	0	0	0	1.78151	3.05747	1.15562	0	0
	244	0.4027	258.072	C8H13N3O3;	NaCl;	0.813759	Methylidene-One; Glutamyl-aminopropiononitrile	3	0	1.2625	0	4.0187	1.7531	2.1432	0	0	1.14719	1.45809	0.551107	2.0473	1.6009	2.6522	0	0	0	1.05007	1.19772	0.488966	5.8694	2.1073	2.8997	0	0	0	1.81273	2.34874	0.958868	3.2325	4.2165	0	0	2.1688	0	0	1.37397	1.81278	0.685167	2.7428	1.1102
	245	0.4037	538.132	C22H29NO12;C23H33NO7S2;C20H20N6O9S;C21H27N5O7S;C18H24N5O8P;C21H27NO9S;C21H26N3O6P;C23H21N7O;	K;K;NH3;Na_Na;HCOONa;HCOONa;Na_HCOONa;NaCl_HCOONa;	3.4564	(indolylacetyl-myo-inositol)-galactoside; Suplatast tosilate; ((Carboxy(Hydroxyphenyl)Acetyl)Amino)-Methoxy-(((Methyl-1h-Tetrazolyl)Thio)Methyl)-Oxo-Oxa-Azabicyclo Oct-2-Ene-2-Carboxylic Acid; Latamoxef; Moxalactam; Aspoxicillin; Bucladesine; Bendacalol mesylate; N-[(Furanyl)Carbonyl]-Leucyl-[Amino-(Indolyl)Ethyl]-Phosphonic Acid; Amino(Imino)Methyl-(Aminomethyl)Phenyl-(Pyrimidinylamino)-Naphtham…	3	0	0	0	0	0	0	0	0	0	0	0	0	0	0	0	0	0	0	0	0	1.7346	2.5608	0	0	0	0	0.7159	1.13943	0.465169	0	0	0	0	0	0	0	0	0	0	0	0
	246	0.4067	322.081	C16H20BrNO;C18H15NO2;C14H17NO4;C15H13N5;	H;Na_Na;NaCl;NaCl;	0.465721	Quindonium bromide; Etocrylene; Mesopram; Chromocarb diethylamine; (Pyrimidinylamino)Naphthalene-Carboximidamide	3	2.7352	0	0	0	1.5715	1.583	0	0	0.736212	1.07708	0.407099	2.8169	0	2.7521	0	0	0	0.928167	1.43806	0.587084	0	2.3458	0	0	0	0	0.390967	0.957669	0.390967	3.2791	4.4528	3.5004	0	3.6482	0	0	2.12579	2.02111	0.763908	2.8907	3.8243
	247	0.4084	529.987	C10H16N5O13P3;C14H17N3O5S3;	Na;NaCl_HCOONa;	2.32082	Hydroxydeoxyadenosine-triphosphate; Monophosphoadenosine-Diphosphate; Phosphate-Adenosine-Diphosphate; ATP; dGTP; Al7089a	3	2.1082	1.2551	0	0	1.7687	1.5635	5.7228	5.5241	2.2428	2.22382	0.840524	1.6911	2.9424	1.2783	3.3474	5.3956	8.3255	3.83005	2.63695	1.07653	1.2467	1.6051	1.679	4.2396	7.7947	5.6466	3.70195	2.65852	1.08534	1.0887	0	0	1.4058	1.1973	6.2774	2.8863	1.8365	2.18794	0.826963	1.2419	1.6672
	248	0.4123	274.097	C15H13N3O;	Na;	3.35649	Hydroxy-Phenyl-1h-Indole-Carboxamidine	3	1.3324	0	0	3.197	0	0	0	0	0.566175	1.16077	0.438729	0	0	0	1.7448	0	0	0.2908	0.712312	0.2908	0	0	0	0	0	0	0	0	0	2.5735	2.82	2.8795	2.9718	0	0	1.676	1.84583	1.33278	0.503743	2.5922	3.5217
	249	0.4128	276.104	C8H17NO5;	HCOONa;	1.70225	Deoxy-dimethylamino-alpha-Glucose; Miglitol; Ethylglycocyamine	3	0	0	0	0	3.9809	0	0	0	0.497613	1.40746	0.53197	4.0123	0	0	0	0	0	0.668717	1.63801	0.668717	0	0	0	0	0	0	0	0	0	3.6026	4.8695	0	0	0	0	0	1.2103	2.09909	0.79338	3.4571	0
	250	0.4134	450.021	C10H15N5O10P2;C12H14CuN8O2;C10H13FN5O7P;C14H15Cl2N3O4;	Na;HCOOK;HCOOK;Na_HCOONa;	3.55539	Azido-Deoxythymidine-Diphosphate; Adenosine-bisphosphate; ADP; dGDP; Acetyl adenylate; Adenosine Phosphonoacetic Acid; GUANOSINE-O-ETHYLIDENEPHOSPHONATE; Felodipine; Imazalil nitrate; PC (3:1) Methoxy-Dimethyl-(Phenoxymethyl)Indole-Dione; Acronidine; Actinodaphnine; Cularicine; IC261	3	5.6811	3.0435	5.5261	4.5961	6.7707	7.9691	18.5724	16.9996	8.64482	5.83836	2.20669	5.1608	8.7412	9.6121	15.021	21.5241	21.0585	13.5196	6.79901	2.77568	3.1416	4.9859	8.6921	13.8069	14.9665	19.9112	10.9174	6.42231	2.6219	9.019	9.8517	9.4618	9.0157	7.7916	28.4314	14.6013	12.5961	7.31245	2.76385	5.2594	5.1387
	251	0.4181	298.056	C10H13N3O4;C6H15NO6S;	NaCl;HCOONa;	1.00652	Amino-(Pentahydro-Dioxo-Cyclopenta[E]Pyrimidinyl) Proionic Acid; TES	3	0	0	0.3963	0.638	0	0.9889	0	0	0.2529	0.383658	0.145009	0	0	0	0	0	0	0	0	0	0	0.9906	0	0	0	0	0.1651	0.404411	0.1651	0	0	0	0	0	0	0	0	0	0	0	0
	252	0.4197	427.097	C16H18O5;	HCOONa_HCOONa;	2.01359	Methylvisamminol	3	0.4324	0.3138	0.6159	0.4282	0	0	0	0	0.223787	0.252836	0.0955629	0	0	0	0	0	0	0	0	0	1.4669	1.7648	0	0	0	0	0.538617	0.839722	0.342815	0	0	0	0	0	0	0	0	0	0	0	0
	253	0.4278	735.122	C28H32O15;	NaCl_HCOONa;	4.93794	Diosmin;Physcion 8-gentiobioside	3	0.8108	0	0	0	0	1.2038	0	0	0.251825	0.477973	0.180657	2.1045	3.1704	2.3409	0	0	0	1.2693	1.43481	0.58576	0	0	0	0	0	1.2548	0.209133	0.51227	0.209133	4.0591	0	4.067	3.8147	4.1972	0	3.4414	2.79706	1.9263	0.728072	2.0594	0
	254	0.4289	344.06	C10H16N3O7P;C18H12FN3O;C10H13NO8;C8H15N3O4;	Na;K;HCOONa;NaCl_HCOONa;	4.03999	Deoxy-methylcytidylate; Phosphoric Acid Mono-[Amino-(Methyl-Dioxo-Dihydro-2h-Pyrimidinyl)-Tetrahydro-Furanylmethyl] Ester; Fluorophenyl-Hydroxy-(Pyridinyl)-1h-Pyrrolo[3,2-B]Pyridine; D-Glucopyranuronosyloxy-methylisoxazole; Acetylcitrulline	3	55.2462	47.1646	48.8189	44.1282	43.4965	46.4616	0	15.4084	37.5905	19.2386	7.27152	58.1359	51.0694	51.4618	22.0156	8.7072	19.429	35.1365	20.817	8.4985	40.9781	38.8836	39.7335	0	0	0	19.9325	21.8452	8.91825	50.385	70.0894	62.6973	60.8558	45.7879	0	19.5709	44.198	25.4651	9.62491	52.4606	65.863
	255	0.4292	198.04	C8H7NO5;C7H5N5O;C6H9N3O;	H;Na;NaCl;	4.34257	Hydroxy-methylpyridine-dicarboxylate; Clavulanate-aldehyde; TRIBOA; Cyano-deazaguanine; Amino-hydroxymethyl-methylpyrimidine; Histidinal	3	7.2437	5.6956	6.5741	7.4343	7.481	9.5484	4.2927	0	6.03373	2.87145	1.08531	6.9834	9.1915	8.4157	0	0	3.9616	4.7587	4.0963	1.67231	5.5063	4.7933	6.4982	0	0	0	2.79963	3.11429	1.2714	3.4879	4.9509	5.4869	3.6944	3.5136	0	0	3.0191	2.19743	0.83055	4.6275	4.1404
	256	0.4298	212.053	C7H11NO5;C6H9NO3;	Na;HCOONa;	1.69769	Amino DHQ; Glutarylglycine; Amino-oxoheptanedioate; Amino-epsilon-keto-pimelate; Acetylglutamic acid; Trimethadione	3	0	0	0.9469	0	1.9118	1.1185	0	0	0.49715	0.739244	0.279408	0	1.4754	0	2.1849	0	0	0.61005	0.971352	0.396553	6.6105	3.208	1.5599	0	3.6546	0	2.5055	2.53433	1.03464	2.9356	3.584	4.2444	2.728	2.8671	0	2.7161	2.72503	1.32519	0.500873	2.3408	3.0058
	257	0.4356	428.038	C10H15N5O10P2;C11H20NO12P;C12H16N5O8P;C12H21N3O5S3;C14H15Cl2N3O4;C11H22NO7P;	H;K;K;Na_Na;HCOONa;NaClx2;	2.10262	Azido-Deoxythymidine-Diphosphate; Adenosine-bisphosphate; ADP; dGDP; Acetyl adenylate; Adenosine Phosphonoacetic Acid; GUANOSINE-O-ETHYLIDENEPHOSPHONATE; Felodipine; Imazalil nitrate; PC (3:1) Methoxy-Dimethyl-(Phenoxymethyl)Indole-Dione; Acronidine; Actinodaphnine; Cularicine; IC261	3	12.198	12.8985	0	3.7762	15.6677	12.8314	28.3329	27.9732	14.2097	10.0674	3.80511	22.3122	23.7898	28.7069	26.2809	36.6673	48.2726	31.0049	9.85347	4.02266	15.5479	19.3077	14.2705	23.136	28.111	34.887	22.5434	7.89381	3.22264	34.2392	14.8235	37.2026	38.6863	35.0191	51.2787	0	30.1785	17.0947	6.4612	23.5043	24.4555
	258	0.4382	347.03	C15H12O6;C8H12N6O4S;C12H16O7;C12H10N2O5;C9H11FN2O6;C12H14Cl2N2;	NaCl;NaCl;KCl;HCOOK;HCOOK;Na_HCOONa;	4.86991	Dalbergioidin; Tetrahydroxyisoflavanone; Pentahydroxychalcone; Hydroxy-dihydrogenistein; O-Methylswertianin; Dimethoxy-dihydroxyxanthone; Dihydrokaempferol; Eriodictyol;Eriodictyol chalcone; Fustin; Gentiacaulein; Micromelin; Okanin; Swerchirin; Dihydralazine sulfate; Arbutin; hydroquinone-O-glucopyranoside; Cinoxacin; Fluorouridine; Methyl viologen	3	5.9735	6.5044	5.6362	0	7.017	8.9105	18.0404	17.8051	8.73589	6.21454	2.34888	0	6.1436	6.4136	7.7997	15.9428	13.87	8.36162	5.77518	2.35771	6.0787	6.7086	7.3782	18.1769	21.4672	21.7728	13.5971	7.64732	3.12201	5.9491	6.6857	6.9901	7.2845	6.4911	20.3458	7.3729	8.73131	5.14475	1.94453	4.877	7.3672
	259	0.4389	246.112	C14H12O3;	NH3;	1.9097	Hydroxy-methoxybenzophenone; Trihydroxystilbene; Dihydro-dihydroxy-(2H)-anthracenone; Dehydrokawain; Benzyl parahydroxybenzoate; Resveratrol; Seselin; Trioxsalen; Xanthyletin	3	0	1.4248	0	1.3075	1.7996	1.5257	2.0228	0	1.01005	0.864874	0.326891	0.8611	0.7798	1.1787	1.5732	1.4476	1.9497	1.29835	0.446424	0.182252	0	2.3422	0	0	0	0	0.390367	0.956199	0.390367	1.0762	1.3087	1.0995	0.8573	1.2414	1.294	1.6769	1.222	0.254716	0.0962736	1.0206	0.7502
	260	0.4399	202.083	C7H11N3O4;	H;	1.33609	Misonidazole	3	0	0	0	0	0	0	0	0	0	0	0	0.754	0	0	0	0	0	0.125667	0.307819	0.125667	0	1.6151	0	0	0	0	0.269183	0.659362	0.269183	1.026	1.047	0	0	0.913	0	0	0.426571	0.533653	0.201702	0.7176	0
	261	0.4414	426.996	C12H17O10P;C12H11N2O8P;	KCl;HCOOK;	3.88763	Arbutin-phosphate; (nitrophenyl) phosphate	3	1.7298	0	0	1.8733	1.6787	0	2.1971	3.4723	1.3689	1.26562	0.478358	2.1483	1.9775	0	2.2676	1.4476	0	1.30683	1.05037	0.428811	2.0023	1.9137	1.595	2.9239	0	0	1.40582	1.17531	0.479818	1.6443	2.2684	2.1989	2.8761	1.8362	4.1078	2.4422	2.48199	0.821045	0.310326	1.4258	2.8578
	262	0.4414	774.065				Unidentified	4	1.5601	1.5689	1.5181	0	1.2936	1.5174	2.2142	0	1.20904	0.791418	0.299128	1.127	1.6565	1.518	1.7277	1.974	3.6998	1.9505	0.90132	0.367962	1.212	1.2964	1.4271	1.6081	2.0913	3.137	1.79532	0.727672	0.297071	1.9052	1.3087	1.5297	2.7104	1.6534	0	1.1101	1.45964	0.824711	0.311711	1.3408	1.6436
	263	0.4461	324.06	C11H15N3O5S;C17H13NO3;C11H14NO4P;C11H17N3O;	Na;Na_Na;HCOONa;NaClx2;	2.65382	Acetyl-[carboxy-(1H-imidazolyl)ethyl]-cysteine; Graveoline; (Indolyl)propanol-phosphate; Alchornine; Arenaine	3	0	1.4803	1.4459	1.5719	1.1816	1.5613	0	0	0.905125	0.759004	0.286877	1.4168	1.867	1.4318	1.4114	1.1342	2.0719	1.55552	0.345398	0.141008	2.1563	2.1069	1.9578	0	0	0	1.03683	1.13767	0.464453	2.4739	3.1409	2.5456	2.5114	2.8142	2.3115	1.5454	2.47756	0.49255	0.186166	1.9993	2.3166
	264	0.4475	855.068				Unidentified	4	0	0	1.0568	0	0	0	0	0	0.1321	0.373635	0.141221	1.7555	0	2.3376	2.0517	3.1584	5.7716	2.51247	1.90618	0.778193	0	0	0	0	0	3.7644	0.6274	1.53681	0.6274	3.2291	2.7047	3.2485	4.6982	3.7853	0	3.4414	3.01531	1.46602	0.554102	2.3163	2.5945
	265	0.4476	146.029				Unidentified	4	7.865	6.5503	6.6133	0	3.5125	9.4093	13.4406	10.6915	7.26031	4.18558	1.582	8.0624	7.4726	8.7442	6.6944	11.2158	11.8143	9.00062	2.06994	0.845051	9.2149	8.0253	5.9668	15.2976	17.743	22.1124	13.06	6.31395	2.57766	7.8521	11.4524	10.3936	8.9581	13.3145	17.9393	9.5787	11.3555	3.39846	1.2845	0	8.107
	266	0.4487	648.135	C20H37NO15;	NaClx2;	0.0462862	H TYPE I TRISACCHARIDE	3	0	0	0	1.375	0	0	0	0	0.171875	0.486136	0.183742	0.7681	0	0	0	0	0	0.128017	0.313576	0.128017	1.5991	1.932	0	0	0	0	0.588517	0.917784	0.374684	1.4404	0	0	2.325	0	0	0	0.537914	0.953495	0.360387	1.9845	1.7288
	267	0.4494	63.9999				Unidentified	4	2.845	2.7018	3.046	0	3.2756	4.1675	0	3.8176	2.48169	1.60683	0.607325	0	0	0	0	0	0	0	0	0	4.3013	6.0275	5.2495	5.4867	6.3213	7.05	5.73938	0.949871	0.387783	0	0	0	0	0	0	0	0	0	0	0	0
	268	0.4496	752.08				Unidentified	4	0.5245	0.5753	0.7397	0.9388	1.0632	0.7424	1.0114	0	0.699412	0.343435	0.129806	1.2551	1.3772	1.518	1.0798	0	0	0.871683	0.690399	0.281854	0.8673	0	0	0	0	1.4639	0.388533	0.630787	0.257518	0	2.4429	2.1989	2.5614	2.3048	1.7005	0	1.60121	1.12696	0.425952	1.7676	1.5294
	269	0.4519	937.2	C29H44N7O19P3S;C40H38N4O17;	NH3;Na_HCOONa;	3.64917	dihydrodiol derivative of phenylacetyl-CoA; Hydroxyacetic acid uroporphyrin III; Mesohydroxy uroporphyrin III; Peroxyacetic acid uroporphyrin III	3	0	1.5689	1.7384	1.7982	0	2.6913	0	0	0.9746	1.09292	0.413085	0.9141	1.533	1.4381	0	0	1.9239	0.968183	0.816201	0.333212	1.7836	0	3.9466	1.7543	2.2814	0	1.62765	1.4929	0.609474	1.6331	1.8079	1.7632	0	2.1665	1.2367	2.2202	1.5468	0.758144	0.286552	1.392	0.5913
	270	0.452	754.109	C30H27N3O15;C22H29N9O9S2;	HCOOK;NaCl_HCOONa;	3.87212	enterobactin; Enterochelin; Cefbuperazone	3	0	0	0.5284	1.1121	0.5589	0.464	0	0.6313	0.411837	0.393754	0.148825	0	0	0	0	0	0	0	0	0	1.0964	0.9802	0	0.944	0	0	0.503433	0.553778	0.226079	0.7217	0	0	0.976	1.0566	0.6183	0	0.4818	0.473851	0.179099	0.5282	1.108
	271	0.4532	492.127	C18H24N5O8P;C22H22N2O6S2;C21H26N3O6P;C22H25F2N3O2S;C21H24ClN3O3;C19H23N5O3S;	Na;NH3;Na_Na;NaCl;Na_HCOONa;Na_HCOONa;	3.33247	Bucladesine ; Ticarcillin cresyl; N-[(Furan-2-Yl)Carbonyl]-(S)-Leucyl-(R)-[1-Amino-2(1h-Indol-3-Yl)Ethyl]-Phosphonic Acid; Lubeluzole; Fominoben; Ipsapirone	3	0	0.6799	0	0.8291	0.6731	0	0	2.2096	0.548963	0.762907	0.288352	0	0	0	0	0	1.7759	0.295983	0.725008	0.295983	0.8131	0.2867	0	1.4469	0	0	0.42445	0.592605	0.24193	0	0	0	0	0	0	0	0	0	0	0	0
	272	0.4542	473.123	C21H26Cl2N2O6;C20H26N4O5S;C23H25F3N2OS;C21H23Cl2NO6;C22H23FN2O5;C22H26N2O4S;C17H24O11;C21H25ClN2O3;C22H28O4;C20H25FN4O;C19H26N2O2S;	H;K;K;NH3;NaCl;NaCl;HCOONa;HCOOK;NaClx2;NaClx2;NaCl_HCOONa;	3.08586	Compound WIN VIII; Glisolamide; Niperotidine; cis-(Z)-Flupenthixol; Flupenthixol; Clevidipine; Escitalopram oxalate; Diltiazem; Gardenoside; Scandoside methyl ester; Bepotastine; Cetirizine; Levocetirizine; (17Z)-3,11-Dioxopregna-4,17(20)-dien-21-oic acid methyl ester; Niaprazine; (2s,3r)-3-Amino-2-Hydroxy-5-(Ethylsulfanyl)Pentanoyl-((S)-(-)-(1-Naphthyl)Ethyl)Amide	3	0.7998	0.9084	0.8454	1.4086	1.0072	0	0	0	0.621175	0.546588	0.206591	1.234	0	0	0	0	0	0.205667	0.503778	0.205667	0.9215	0	0.8661	0	0	0	0.297933	0.461889	0.188565	1.7964	0	0	1.7392	0	0	0	0.505086	0.862756	0.326091	1.8881	1.8181
	273	0.4567	671.065	C28H18N4O11;	HCOOK;	1.69879	Bis[(Nitrobenzoyl)Amino]Phenoxy-Phthalic Acid	3	1.2973	1.5166	1.7437	1.7858	1.2311	0	0	1.275	1.10619	0.713609	0.269719	1.5121	1.3361	0.8788	1.1878	0	0	0.819133	0.667666	0.272574	1.6837	1.3262	1.0074	1.1695	1.1407	3.4289	1.62607	0.913261	0.372837	1.1474	0	1.2753	2.325	1.6374	0	0	0.912157	0.931433	0.352049	1.5446	1.9714
	274	0.4571	100.023				Unidentified	4	2.0001	1.8335	2.2737	2.0873	0	2.6467	3.3232	0	1.77056	1.18672	0.44854	3.3454	2.5483	3.4884	2.8075	3.2293	4.3873	3.30103	0.637554	0.260281	3.0495	2.7142	2.441	3.5086	0	9.3687	3.51367	3.11873	1.27322	3.2893	4.4137	0	4.2012	4.618	5.7848	0	3.18671	2.29689	0.868141	2.245	3.3939
	275	0.4609	148.061				Unidentified	4	0	6.9338	6.9124	0	0	0	0	0	1.73077	3.20478	1.21129	0	0	0	0	0	0	0	0	0	17.645	3.526	0	0	0	0.7668	3.6563	6.98793	2.85281	0	0	0	0	0	0	0	0	0	0	0	4.1343
	276	0.4621	102.056				Unmatched Adduct	4	0	0	0	0	0	0	0	0	0	0	0	0	0	0	0	0	0	0	0	0	4.8466	0	0	0	0	0	0.807767	1.97862	0.807767	0	0	0	0	0	0	0	0	0	0	0.2581	0
	277	0.4624	290.133	C11H19N3O6;C14H21NO4;C13H19N5;C13H19NO2;	H;Na;Na_Na;HCOONa;	3.23986	Ophthalmic acid; Codonopsine; Diethofencarb; Pinacidil; Carnegine; Dioscorine; Exalamide; Ibuproxam	3	0	0	0	0	0	0	0	0	0	0	0	0	0	0	0	0	0	0	0	0	1.4924	0	0	0	0	0	0.248733	0.60927	0.248733	0	0	0	0	0	0	0	0	0	0	0	0
	278	0.4644	260.115	C12H19N3O;C12H10N4O2;C11H15ClN2O2;	K;NH3;NH3;	3.57534	Alchorneine; CGP 28014; Procarbazine; Lumichrome; Iproclozide	3	5.2214	5.577	5.8991	7.2231	4.4459	7.7706	8.2173	8.5567	6.61389	1.52502	0.576404	3.4453	4.719	5.2472	5.4131	5.1363	5.8427	4.96727	0.830675	0.339122	9.0913	3.3406	9.2338	12.0226	0	12.6421	7.72173	5.01376	2.04686	2.7015	4.73	4.2433	2.6915	5.13	3.7101	0	3.3152	1.73535	0.655901	0	3.8147
	279	0.4648	386.104	C12H23NO10;C21H17N3O;C17H26ClNO2;C13H19NO8;C14H23NO4S;C11H21NO8;C12H17N5O4;C11H21N3O4;	Na_Na;NaCl;KCl;HCOONa;HCOOK;Na_HCOONa;Na_HCOONa;NaCl_HCOONa;	4.71375	Amino-Deoxy-Cellobiono-Lactam; (Glucosaminyl)-myoinositol; Lactosamine; CRA_8696; Butachlor; Pretilachlor; Metaraminol bitartrate; Sulfonterol; Choline hydrogencitrate; Dimethyladenosine; (Tert-Butyloxycarbonyl)-Alanyl-Alanyl-Amine	3	0	0	0	0	0	0	0	0	0	0	0	0	0	0	0	0	0	0	0	0	0	0	0	0	0	0	0	0	0	0	0	0	0	0	0	0	0	0	0	0	0
	280	0.4659	649.082	C30H26O14;C29H24O12;C28H19FN4O8;C24H26O13;	K;HCOOK;Na_HCOONa;NaCl_HCOONa;	3.15825	Cyanidin 3-(6-p-caffeoyl)glucoside; Delphinidin 3-(6-p-coumaroyl)glucoside; Gallocatechin-(4alpha->8)-epigallocatechin; Theaflavin; Emitefur; Iridin; rosmarinic acid 3'-O-beta-glucoside	3	0.9033	0.5251	0.7245	0.9422	0.8622	0	0.4218	0	0.547388	0.383324	0.144883	1.5353	1.2744	0	0	0	0.444	0.542283	0.694831	0.283664	0.5968	0.7774	0.4197	0.4386	0	0.6274	0.47665	0.268141	0.109468	1.4557	1.2215	0.9789	1.8249	1.7104	0	0.444	1.09077	0.670045	0.253253	1.757	1.7288
	281	0.467	647.146	C29H32O13;C27H34N2O9;C26H32O11;	NaCl;NaClx2;NaCl_HCOONa;	0.664454	Etoposide; 3-alpha(S)-Strictosidine; strictosidine; Brusatol	3	0	0	0	0	0	0	0	0	0	0	0	0	0	0	0	0	0	0	0	0	0.9222	0	0	0	0	0	0.1537	0.376487	0.1537	0	0	0	0	0	0	0	0	0	0	0	0
	282	0.4692	278.127				Unidentified	4	0	0	1.5738	1.908	1.9587	0	1.7338	0	0.896788	0.965554	0.364945	1.0055	1.0689	1.0386	0	0	0	0.518833	0.568707	0.232174	2.6982	0	2.9132	3.0701	3.232	0	1.98558	1.5481	0.63201	0.9154	1.2946	1.184	0	1.2436	0	0	0.662514	0.631119	0.238541	0	0
	283	0.4701	72.082				Unidentified	4	4.0495	4.2051	4.7005	4.7438	5.8916	6.9286	5.4194	4.9697	5.11353	0.947087	0.357965	2.4312	2.4283	2.6365	0	2.7401	0	1.70602	1.32693	0.541716	7.0569	6.1151	8.2699	0	6.0141	4.5164	5.32873	2.89069	1.18012	3.0671	1.9194	0	0	2.9529	0	0	1.1342	1.46093	0.552181	2.2353	0
	284	0.4734	444.033	C10H15N5O11P2;C16H20ClN3O3S;C17H24BrNO3;C11H22NO8P;C18H17NO5;C9H19NO9S;C9H21NO7P2;	H;KCl;KCl;NaClx2;NaClx2;NaCl_HCOONa;NaCl_HCOONa;	3.35561	GDP; Tripamide; Homatropine methylbromide; PC(3:0); Tranilast; Ghavamiol; 3-Aza-2,3-Dihydrogeranyl Diphosphate	3	0	0	1.326	0	0	0	0	0	0.16575	0.468812	0.177194	0	1.8706	0	0	0	0	0.311767	0.763669	0.311767	0	0	0	0	0	0	0	0	0	0	0	0	2.325	1.9325	0	0	0.608214	1.04489	0.394929	2.1649	2.0022
	285	0.4741	238.075	C12H13N3;C9H8N4OS;C11H17N;	K;NH3;KCl;	3.06626	Pyrimethanil; Thidiazuron; Amino-Phenylpentane; Etilamfetamine; Mephentermine	3	0	0	0	0	0	0	0	0	0	0	0	0	0	0	0	0	0	0	0	0	0	0	0	0	0	0	0	0	0	0	0	0	0	0	0	0	0	0	0	0	0
	286	0.4744	343.056	C19H12O5;C16H16O6;C17H14O5;C13H16O7;C11H16N4O4;C15H14O4;C16H12O3;C11H18N2O3;	Na;K;Na_Na;NaCl;KCl;HCOOK;Na_HCOONa;NaClx2;	2.30283	Hydroxytetrangulol; Dehydrorabelomycin; Acetyl-hydroxy-oxo-dihydronapthalenyl)-hydroxybutanoate; Dihydroxy-methyl-oxo-tetrahydro-1H-benzo[g]isochromenyl)acetate; Methoxy-alpha-pyrufuran; Cotonefuran; Afrormosin; Apigenin-dimethyl ether; Sayanedine; Xanoxate; p-Cresol glucuronide; acetylcarnosine; Deoxycoformycin; Dexrazoxane; Icrf-187; Pentostatin; Bis(hydroxyphenyl)-propanoic acid; Acetomenaphto…	3	2.3705	3.1022	3.2963	3.4555	2.7551	0	0	1.8754	2.10688	1.39618	0.527708	0	0	0	0	0	0	0	0	0	9.0962	4.64	0	5.5605	5.3232	6.0649	5.11413	2.9456	1.20254	1.4692	0	0	0	0	0	0	0.209886	0.555305	0.209886	2.2524	2.7757
	287	0.4745	452.135	C19H27NO8S;C24H18O8;C26H21N3O2;C21H24F3N3S;C22H23N3O4;C17H22BN2O6;C19H29NO4;	Na;NH3;Na_Na;Na_Na;NaCl;Na_HCOONa;NaClx2;	2.60984	N-Methylscopolamine methylsulfate; Knipholone; Renilla luciferin; Trifluoperazine; Erlotinib; D-Naphthyl-1-Acetamido Boronic Acid Alanine; Ankorine	3	0	1.7918	0	2.2945	0	0	0	0	0.510788	0.95529	0.361066	0	0	1.0086	1.0711	0	7.657	1.62278	2.99979	1.22466	0	0	0	0	0	0	0	0	0	4.5414	3.6298	0	0	1.7145	3.6555	0	1.93446	1.99612	0.754464	0	0
	288	0.4749	305.105				Multiply Charged ion - not identified	3	0	0	0	2.7465	0	0	0	0	0.343313	0.971034	0.367017	0	0	0	0	0	0	0	0	0	7.9519	0	0	0	0	0	1.32532	3.24635	1.32532	1.695	0	0	0	2.5526	0	0	0.6068	1.06547	0.40271	0	2.2805
	289	0.4769	470.143	C18H24N5O8P;C21H26N3O6P;C24H20O9;C21H24ClN3O3;	H;Na;NH3;HCOONa;	0.893345	Bucladesine; N-[(Furan-2-Yl)Carbonyl]-(S)-Leucyl-(R)-[1-Amino-2(1h-Indol-3-Yl)Ethyl]-Phosphonic Acid; Cinchonain 1a; Fominoben	3	0	0	9.1585	0	0	0	0	11.0863	2.5306	4.714	1.78173	0	0	0	18.2939	0	0	3.04898	7.46845	3.04898	7.7825	0	0	3.7404	0	0	1.92048	3.23816	1.32197	14.4639	0	0	0	0	0	15.4684	4.27604	7.30849	2.76235	0	0
	290	0.4776	775.169				Unidentified	4	0	0.7322	0	0	0.7834	0	0	0	0.18945	0.35106	0.132688	0	0	0	0	0	0	0	0	0	0	0	0.6716	0	0	0	0.111933	0.27418	0.111933	0	0	0	0	0	0	0	0	0	0	0	0
	291	0.4809	434.125	C25H21N3O2;C19H22FN3O4;C18H24ClN3O2;C19H27NO3;	K;NaCl;HCOOK;NaClx2;	0.598906	Benzyl-dimethoxy-phenyl-3H-pyrazoloisoquinoline; Oxidized Renilla luciferin; Gatifloxacin; Pancopride (USAN/INN);;Glycopyrrolate;Nateglinide;Protoemetine;Tetrabenazine;;	3	0	0.7965	0	0	0	0	0	0	0.0995625	0.281605	0.106437	0	0	0	0	0	0	0	0	0	0	0	0	0	0	0	0	0	0	1.5095	0	0.3667	0	1.591	0	0	0.495314	0.73337	0.277188	0	0
	292	0.485	346.057	C15H17NO4S;C12H15NO8;C13H11NO6;C11H13NO6;C6H13N5O4;	K;Na_Na;HCOONa;Na_HCOONa;NaCl_HCOONa;	1.96502	Hydroxy-acetyl-cysteinyl-dihydronaphthalene; Acetyl-cysteinyl-hydroxy-dihydronaphthalene; NAC-Diketide; O-[O-Nitrophenyl]-Galactopyranose; Nitrophenol-galactopyranoside; Metanitrophenyl-Galactoside; Phthalimidoglutarate; Nicotinate D-ribonucleoside; Nitroarginine	3	0	0	0	0	0	0	0	0	0	0	0	0	0	0	0	11.3008	6.5119	2.96878	4.84213	1.97679	2.9646	4.0545	0	0	0	0	1.16985	1.84481	0.753139	0	0	0	1.412	0	13.1167	0	2.07553	4.89705	1.85091	1.6779	0.9356
	293	0.4887	119.037				Unidentified	4	2.2162	0	0	2.7088	0	0	3.9666	3.0906	1.49778	1.67282	0.632266	1.9073	1.9775	0	3.4184	3.2758	0	1.76317	1.50413	0.61406	0	0	0	0	0	7.4358	1.2393	3.03565	1.2393	0	0	3.0109	2.8761	0	4.6819	0	1.50984	1.97063	0.744828	0	0
	294	0.4922	293.174	C17H24O4;C15H26O4;C13H17N5O2;C11H22N3O3P;C14H24O2;	H;Na;NH3;NH3;HCOONa;	0.68219	Gingerdione; Trichodermin; Juvenile hormone III acid diol; Cipamfylline; Meturedepa; Tetradecynoic acid; Tetradecadienoic acid; Alepric acid	3	2.1082	1.6731	0	2.0874	2.2688	2.2371	1.7084	0	1.51038	0.957814	0.36202	0	1.7637	1.9974	0	1.8424	0	0.933917	1.02581	0.418787	2.1986	3.2207	3.0221	2.724	0	0	1.8609	1.48205	0.605043	0.8165	0	0	0	0	0	0	0.116643	0.308608	0.116643	1.3419	1.6657
	295	0.4938	775.102	C36H28O16;	NaCl;	2.10295	Theaflavin-gallate	3	1.1759	0.4184	0	1.0169	0	3.1553	5.9463	4.242	1.99435	2.20653	0.83399	1.5639	2.4961	3.3556	4.8819	5.7908	0	3.01472	2.13408	0.871236	0	1.3052	2.6954	3.4568	0	5.4375	2.14915	2.13408	0.871235	3.2968	4.4518	4.92	2.9177	3.4985	8.3808	5.7917	4.75104	1.88949	0.71416	0	2.3818
	296	0.4943	302.124	C13H16O7;C11H21N3O3;	NH3;NaCl;	1.39015	p-Cresol glucuronide; Lysyl-proline	3	0	0	0	0	0	0	0	0	0	0	0	0	0	0	0	0	0	0	0	0	0	0.736	0	1.3157	0	0	0.34195	0.560568	0.228851	0	0	0	0	0	0	0	0	0	0	0	0
	297	0.4961	613.159	C20H32N6O12S2;C24H32O12S;C18H34N2O13;	H;HCOONa;NaCl_HCOONa;	0.489269	Glutathione disulfide; Oxidized glutathione; Oxiglutatione; Estriol 3-sulfate 16-glucuronide; Glucosylgalactosyl hydroxylysine	3	43.3604	41.7591	40.376	41.4234	40.0587	22.7907	45.7662	38.4384	39.2466	7.00882	2.64908	15.8732	11.5515	15.3086	9.8815	18.9412	16.9306	14.7478	3.40081	1.38837	65.4886	87.3158	80.858	58.3919	85.8718	89.1843	77.8517	12.8288	5.23732	12.9528	10.9617	13.1965	9.9043	13.73	15.6896	3.0183	11.3505	4.1258	1.5594	8.7582	8.3617
	298	0.4966	186.089	C10H13NO;C6H15N;	Na;HCOOK;	1.23597	Methylimino-phenylpropanol; EPA; Acetylphenylethylamine; Methyl-(Methylbenzyl)Formamide; Phenylalanylmethane; Hexylamine; Leucine - Reduced Carbonyl; Nervonyl carnitine; Triethylamine	3	3.1517	3.8626	3.4045	4.7264	4.9397	6.1685	5.635	5.0506	4.61738	1.06462	0.40239	0	0	0	0	2.0983	0	0.349717	0.856627	0.349717	7.8919	6.9993	9.256	8.9716	10.6665	0	7.29755	3.7864	1.54579	1.2875	2.0737	1.7636	0	1.8857	0	0	1.0015	0.966352	0.365247	1.4445	1.1595
	299	0.4986	717.115				Unidentified	4	0	0.6616	1.2153	1.0778	1.343	0	3.9011	4.1036	1.5378	1.60443	0.606419	0.777	1.3896	1.5979	1.7277	1.8424	0	1.22243	0.707294	0.288752	0	0	2.5184	6.4329	4.3726	7.7379	3.5103	3.24919	1.32647	0	0	0.9303	0.8651	0	3.0917	0	0.698157	1.13728	0.429853	0	0
	300	0.4988	631.17	C22H40N2O12S;C30H32ClF3NO3;	KCl;HCOOK;	1.55267	Isoprenaline sulfate; Fluperamide	3	2.6546	3.3638	3.3343	3.0716	1.9303	0	0	0	1.79432	1.55304	0.586995	0	0	0	0	0	0	0	0	0	10.357	4.3555	2.308	5.8477	0	4.8101	4.61305	3.49903	1.42847	0	0	0	0	0	0	0	0	0	0	0	3.6449
	301	0.4998	118.087				Unidentified	4	2.2407	2.6529	2.7706	2.9257	3.8381	3.7021	0	2.3675	2.5622	1.18426	0.447606	0.9503	1.5561	0	0	0	0	0.417733	0.674909	0.27553	4.1708	4.724	5.2183	3.5462	4.475	0	3.68905	1.89151	0.772205	0	0	0.7992	0	1.062	0	0	0.265886	0.46038	0.174007	2.0709	0
	302	0.5083	484.118	C16H27NO12;C15H22N5O7P;C22H25NO4S;	NaCl;HCOONa;HCOOK;	2.85054	Hyaluronic acid; isopentenyladenosine-5'-monophosphate; N6-(delta2-Isopentenyl)-adenosine 5'-monophosphate; Adrogolide	3	6.3359	5.3771	6.5392	4.5907	5.7326	6.9946	3.4082	4.4225	5.4251	1.21892	0.460707	0	0	0	0	0	0.7003	0.116717	0.285896	0.116717	8.7406	11.0552	8.0089	11.1589	15.8429	17.9554	12.127	3.95703	1.61545	1.5902	0	0	0	0	0	0	0.227171	0.601039	0.227171	0	0
	303	0.511	275.158	C15H24O3;C13H26O3;C14H22O;C12H24O;	Na;Na_Na;HCOONa;Na_HCOONa;	3.81596	Hydroxylubimin; Cuauhtemone; Juvenile hormone III acid; Todomatuic acid; Hydroxy-tridecanoic acid; Irone; Octylphenol; Dodecenol Dodecylaldehyde	3	1.282	0.9936	0	1.4108	2.0931	0	0	0	0.722438	0.830392	0.313859	1.2639	1.443	1.9175	1.6833	0	0	1.05128	0.843661	0.344423	0	0	1.5111	1.3157	0	0	0.471133	0.732488	0.299037	0	0	0	0	0	0	0	0	0	0	1.1323	1.494
	304	0.5154	695.133	C10H14N5O7P;	H;		Deoxyguanosine-Monophosphate; AMP; Azido-Deoxythymidine-Monophosphate; Ribosyladenine-phosphate; dGMP; Formycin-Monophosphate; Vidarabine phosphate	3	17.0817	17.9519	19.627	19.1215	17.1256	13.6	13.4552	14.3691	16.5415	2.44061	0.922463	14.9446	14.4995	10.7656	11.2458	11.7506	11.5391	12.4575	1.79049	0.730966	24.4702	21.4814	21.1396	26.9882	29.9996	34.8719	26.4918	5.3031	2.16498	14.2565	12.8984	12.4842	20.246	16.0493	21.4355	16.5045	16.2678	3.47248	1.31247	17.9138	16.3276
	305	0.5174	160.135				Unidentified	4	1.3331	0.6799	1.3089	1.3766	2.2724	1.4848	0	0	1.05696	0.781824	0.295502	1.4521	1.8171	1.518	0	0	0	0.797867	0.882635	0.360334	1.2886	1.9755	0	0	0	0	0.544017	0.870329	0.35531	2.4721	0	2.4334	1.9397	2.1665	0	1.4431	1.49354	1.07678	0.406984	1.9359	1.7343
	306	0.5189	112.052				Unidentified	4	4.2416	3.6363	3.5121	4.6507	5.3151	5.7043	6.5931	6.8804	5.0667	1.2764	0.482432	3.0169	3.5978	4.2756	4.7931	4.2623	5.2744	4.20335	0.809692	0.330555	4.7059	5.3406	5.432	7.638	7.5925	9.2811	6.66502	1.77558	0.724876	1.5345	0	4.1784	4.535	1.7769	3.6467	2.3378	2.57276	1.63133	0.616586	8.0463	3.173
	307	0.5189	370.058	C11H17N5O5S;C13H17N3O4S;C16H16F3NO;C10H17N3O2S;	K;NaCl;KCl;NaCl_HCOONa;	2.81037	Adrenochrome monoaminoguanidine mesilate; Sulpyrine; Seproxetine; Iminobiotin; Biotin amide	3	2.9858	2.6341	3.147	4.1264	4.748	5.7894	11.9646	10.943	5.79229	3.65164	1.38019	3.8314	3.752	3.9235	7.4874	7.6722	10.7435	6.235	2.87215	1.17255	5.0238	4.1664	6.18	10.6131	12.8491	14.7551	8.93125	4.41898	1.80404	3.1735	3.3154	0	3.4282	3.5891	8.3808	3.5524	3.6342	2.45298	0.927139	2.9159	3.136
	308	0.5192	327.081	C16H16O6;C14H16N4O3;C11H16N4O4;C15H14O4;C13H14N4O;C8H24O2Si3;C9H18N6;C13H16N2;	Na;K;NaCl;HCOONa;HCOOK;Na_HCOONa;NaClx2;NaCl_HCOONa;	4.43311	(Acetyl-hydroxy-oxo-dihydronapthalenyl)-hydroxybutanoate; Dihydroxy-methyl-oxo-tetrahydro-1H-benzo[g]isochromenyl-acetate; Methoxy-pyrufuran; Cotonefuran; Piromidic acid; Acetylcarnosine; Deoxycoformycin; Dexrazoxane; Icrf-187; Pentostatin; Bis(hydroxyphenyl)-propanoic acid; Acetomenaphtone; Davidigenin; Hibiscoquinone; Lunularic acid; Luvangetin; Naphthyl-methyl-succinic acid; O-Desmethylangolen…	3	14.9825	20.8661	19.807	17.3183	13.5821	15.3899	0	17.5586	14.9381	6.50902	2.46018	11.7747	15.8752	13.1729	8.4349	16.8287	0	11.0144	6.17481	2.52086	42.6754	14.4879	17.2623	33.5807	43.4743	52.0096	33.915	15.1682	6.1924	11.1181	14.1735	12.0623	15.3049	16.1504	15.347	8.9651	13.303	2.65146	1.00216	11.3385	18.2952
	309	0.5194	629.163	C33H34N2O4S;C23H38O10S2;C29H36O8;C22H36N6O6S;	KCl;Na_HCOONa;NaClx2;NaClx2;	2.87683	Profenamine hibenzate; Chenodeoxycholic acid disulfate; Bisphenol A glycidylmethacrylate; Meobentine sulfate	3	0	0	0	0	0	0	0	0	0	0	0	0	0	1.3582	0	0	0	0.226367	0.554483	0.226367	0	0	0	0	0	0	0	0	0	0	2.2684	2.0298	0	0.9122	0	0	0.744343	1.01813	0.384816	2.6835	0
	310	0.5225	61.013				Unidentified	4	2.3881	2.6888	2.9136	3.0304	3.5729	4.3665	0	0	2.37004	1.58116	0.597621	1.6454	3.0231	2.8621	0	1.8019	0	1.55542	1.32431	0.540648	4.2847	5.8635	4.7244	5.1292	5.7864	5.5735	5.22695	0.630591	0.257438	0	2.0939	0	0	0	0	0	0.299129	0.79142	0.299129	0	0
	311	0.5226	348.072	C10H14N5O7P;	H;	4.71167	Deoxyguanosine-Monophosphate; AMP; Azido-Deoxythymidine-Monophosphate; Ribosyladenine-phosphate; Adenosine-phosphate; AMP; dGMP; Formycin-Monophosphate; Vidarabine phosphate	3	313.979	348.609	314.032	374.664	337.134	291.689	216.26	208.77	300.642	59.8927	22.6373	261.722	278.934	241.418	199.729	197.65	214.924	232.396	33.7253	13.7683	447.835	449.76	371.746	370.887	508.049	377.246	420.921	56.5269	23.077	315.405	327.982	353.233	358.656	328.145	279.889	394.203	336.787	36.2676	13.7078	364.004	282.023
	312	0.5272	307.081	C15H14O7;C12H17N2O4P;C11H16N4O4;C13H16N2O3;C10H14N4O2;C10H16N2O;	H;Na;K;NaCl;HCOOK;NaCl_HCOONa;	0.944377	Epigallocatechin; Gallocatechin; Leucocyanidin; Psilocybin; Acetylcarnosine; Deoxycoformycin; Dexrazoxane; Icrf-187; Pentostatin; Hydroxymelatonin; Acetylpheneturide; Indorenate; IBMX; Morinamide; Rilmenidine	3	0.9849	0	0	0.9598	4.2594	0	0	0	0.775513	1.47466	0.557369	0.703	0	0	0	0	0	0.117167	0.286999	0.117167	3.7113	4.9041	0	0	0	0	1.4359	2.25624	0.921106	0	0	0	0	0	0	0	0	0	0	0	0
	313	0.5292	87.0266	C4H6S			2,3-dihydrothiophene/2,5-dihydrothiophene/but-3-yne-1-thiol	3	4.1862	3.7965	3.9191	4.767	5.2794	6.4528	6.0049	5.6819	5.01098	0.999704	0.377853	3.0736	3.7954	6.3916	4.2113	3.1273	9.3234	4.9871	2.44616	0.99864	5.048	6.6492	5.9616	5.8477	7.9749	8.6876	6.69483	1.38413	0.565069	2.8956	2.2121	2.3353	1.4058	3.4663	1.855	0	2.0243	1.11651	0.422	1.4741	1.6934
	314	0.5301	204.124	C10H13N5;C7H19N3;	H;NaCl;	1.32272	Isopentenyladenine; Spermidine	3	27.787	25.7916	28.9304	35.9044	36.1911	37.3824	32.1112	32.2803	32.0473	4.26897	1.61352	30.6563	38.3827	38.1577	39.1669	30.3487	25.6205	33.7221	5.61171	2.29097	32.755	38.4348	32.7348	31.145	40.2234	29.0647	34.0596	4.33672	1.77046	51.9142	58.4389	49.8642	45.925	57.0688	39.7918	50.683	50.5266	6.37971	2.4113	48.7332	39.0661
	315	0.5305	136.062	C5H5N5;	H;	4.63023	Adenine	3	97.3935	144.973	98.7852	103.102	110.963	83.8831	94.074	101.831	104.376	18.1491	6.85971	90.9657	90.0372	79.5114	20.2239	96.5862	110.978	81.3837	31.6785	12.9327	158.499	119.713	113.099	149.204	164.196	183.796	148.084	27.1054	11.0657	95.7763	106.906	98.7342	152.216	104.581	145.198	130.759	119.167	23.2091	8.7722	138.375	129.48
	316	0.5308	960.228	C31H53N3O19P2;	NaCl_HCOONa;	0.270769	UDP-O-(hydroxymyristoyl)-N-acetylglucosamine; UDP-O-(hydroxytetradecanoyl)-N-acetylglucosamine	3	0	1.7781	0	1.8651	3.0544	3.9905	0	0	1.33601	1.58629	0.599562	0	1.4487	0	0	0	0	0.24145	0.591429	0.24145	0	5.8132	7.2945	6.7314	8.1669	7.3197	5.88762	2.98687	1.21938	0	0	0	0	2.1608	0	0	0.308686	0.816706	0.308686	1.3419	0
	317	0.5309	104.054				Unmatched Adduct	4	5.708	4.8991	4.9675	7.2808	8.066	9.7679	8.5273	6.9472	7.02048	1.74939	0.661209	4.0018	5.3966	5.3798	4.2848	3.948	3.5518	4.42713	0.780306	0.318558	8.2282	12.1544	10.4873	8.6723	7.2244	7.4592	9.03763	1.91748	0.782809	3.4785	2.7047	2.6218	1.568	2.7776	0	0	1.87866	1.39985	0.529092	2.2945	1.927
	318	0.5347	508.001	C10H16N5O13P3;C11H21NO10S3;C12H14ClF2N5O3S;	H;HCOOK;NaCl_HCOONa;	4.78346	Hydroxydeoxyadenosine-triphosphate; Monophosphoadenosine-Diphosphate; Phosphate-Adenosine-Diphosphate; ATP; dGTP; Methylsulfinylpropyl-glucosinolate; Glucoiberin; F5231	3	0	0	2.9138	3.3592	4.6116	0	0	0	1.36057	1.93583	0.731674	5.1808	5.0461	0	0	0	9.0764	3.21722	3.81004	1.55544	3.0034	0	0	0	0	0	0.500567	1.22613	0.500567	5.7024	0	4.399	3.4444	5.3976	8.8076	0	3.96443	3.17342	1.19944	2.9261	3.1865
	319	0.5352	88.0396				Unidentified	4	3.0136	2.7861	3.3018	4.8295	4.6745	4.7457	6.3504	6.3683	4.50874	1.39877	0.528684	3.2386	4.8728	5.3327	5.1098	5.7194	5.7206	4.99898	0.925013	0.377635	3.0826	3.593	4.1907	5.9645	3.731	5.707	4.37813	1.18585	0.484121	4.2236	0	5.6272	4.0945	5.0458	4.7613	5.0022	4.1078	1.88428	0.71219	4.2281	3.7337
	320	0.5355	150.06	C5H11NO2S			Methionine	2	6.7466	6.2232	5.9401	8.4305	10.0322	13.0121	7.9391	9.2004	8.44053	2.3391	0.884096	5.4201	7.8685	8.6427	5.8019	5.6396	4.5923	6.32752	1.56962	0.640796	10.3095	15.7551	14.2136	11.6241	11.4453	9.4159	12.1272	2.40366	0.981292	2.2949	0	0	1.927	2.8279	0	0	1.00711	1.28303	0.484939	2.672	2.951
	321	0.5362	189.161				Unidentified	4	1.0271	1.2146	1.3738	1.1068	1.343	1.5991	1.4449	0	1.13866	0.495495	0.18728	0.7981	1.1542	1.0223	0	0	0	0.495767	0.554893	0.226534	2.0844	1.6068	2.2666	0	0	1.2105	1.19472	0.996517	0.406826	0.5988	0	0	0	0	0	0	0.0855429	0.226325	0.0855429	0	0
	322	0.5407	68.2094				Unidentified	4	1.2413	1.0662	1.4267	0	1.0632	0	0	0	0.599675	0.650999	0.246054	0.7426	0	0	0	0	0	0.123767	0.303165	0.123767	1.7701	1.2499	0	0	0	1.4045	0.737417	0.825279	0.336919	0	0	0	1.134	0	0	0	0.162	0.428612	0.162	0.8815	0.8071
	323	0.5414	652.162				Unidentified	4	0	1.6212	0	2.787	2.8051	1.4245	1.7338	1.894	1.5332	1.07445	0.406105	1.2169	0.6413	0	1.0798	1.0528	0.9585	0.824883	0.447793	0.182811	3.6584	2.5311	1.8469	2.4853	3.6122	2.7187	2.80877	0.704615	0.287658	1.3609	0	1.6069	1.3466	1.7015	1.5459	0	1.08026	0.748747	0.283	2.5317	2.0234
	324	0.545	355.077	C8H15N7O2S3;C15H18O7;C13H18ClF3N2O;C14H16O5;C9H16N4O3;	NH3;Na_Na;Na_Na;Na_HCOONa;NaCl_HCOONa;	0.366118	Famotidine; Mellitoxin; Picrotin; Cinnamoyl-glucoside; Mabuterol; Acetoxyeugenol acetate; Deoxyamidinoproclavaminate; Deoxyguanidinoproclavaminic acid	3	4.7647	4.1118	4.1178	4.1969	1.878	7.4628	9.4348	3.4468	4.9267	2.39394	0.904825	0	0.729	0	0	0	0	0.1215	0.297613	0.1215	6.7637	5.9138	6.2067	11.0696	13.9292	0	7.31383	4.79269	1.95661	1.3496	1.2292	0	0	0	0	0	0.3684	0.630122	0.238164	0	0
	325	0.5451	999.232				Unidentified	4	2.4338	0	1.8494	2.847	2.4537	0	0.8669	0.7892	1.405	1.13716	0.429805	0	1.0155	0	0.7559	0.7896	0.8879	0.574817	0.454307	0.18547	0	2.6545	0	1.9005	2.0913	2.0913	1.45627	1.15595	0.471913	1.8691	1.2215	0.9303	2.1627	2.1665	0.9275	0	1.32537	0.794359	0.30024	2.7874	0
	326	0.5453	74.0251				Unidentified	4	1.6757	1.6735	1.6908	2.5267	2.5765	2.3201	2.6007	0	1.883	0.86775	0.327979	1.7188	2.118	2.6155	2.5916	3.4216	0	2.07758	1.16676	0.476328	1.6847	1.9946	1.8996	1.6761	2.8587	0	1.68562	0.933679	0.381173	1.8508	2.1985	2.3681	2.0005	1.9757	0	1.7762	1.73854	0.792603	0.299576	1.8539	1.7164
	327	0.5463	216.117				Unidentified	4	2.7547	2.8161	2.8646	3.0687	3.4108	4.8417	5.6081	6.7574	4.01526	1.52839	0.577677	0	0	2.1292	0	0	0	0.354867	0.869242	0.354867	4.5344	5.4015	6.145	8.61	10.3415	10.7888	7.63687	2.64743	1.08081	0	0	0	0	0	0	0	0	0	0	0	0.9725
	328	0.5512	56.0499				Unidentified	4	0	1.3938	0	1.702	1.978	2.3262	0	0	0.925	1.02247	0.386459	1.5181	1.4472	2.317	0	0	0.9687	1.04183	0.915793	0.373871	2.0237	3.192	2.913	0	0	0	1.35478	1.53344	0.626024	0	1.4206	0	0	1.0534	0	0	0.353429	0.612831	0.231628	0	0.9635
	329	0.5525	280.139	C10H22O4Si2;C13H21N3O;	NH3;Na_Na;	1.74913	Threonolactone; Procainamide	3	1.8359	0	1.6908	1.7475	2.2942	3.1757	4.1901	2.5253	2.18244	1.22249	0.462057	0.7565	3.1405	1.3582	1.0798	0	1.6279	1.32715	1.05146	0.429255	3.5071	4.5263	4.7541	5.1168	0	5.2402	3.85742	1.98756	0.811418	0	5.7101	0.8457	0.5948	0	0	0	1.02151	2.09642	0.792371	0	0
	330	0.5681	244.118	C11H17NO5;C12H13N5O;C11H14O5;	H;H;NH3;	4.71082	Carbidopa; Topolin; Genipin	3	4.4486	3.9373	3.9036	4.8771	4.8284	6.9073	7.8288	6.7094	5.43006	1.50059	0.567169	1.9867	2.4626	2.4768	0	2.7636	3.5934	2.21385	1.2074	0.492921	6.9854	7.0632	9.2631	10.6131	12.0619	11.4298	9.56942	2.18242	0.890971	1.4153	1.5089	1.6791	0	1.4145	0	1.7762	1.11343	0.772104	0.291828	0	1.4799
	331	0.5682	262.129	C11H19NO6;C12H12N4O2;	H;NH3;	2.63229	Heterodendrin; Lotaustralin; Mycosporine; Flavin	3	17.482	18.1163	16.6949	21.3633	22.2464	30.245	18.3393	20.9795	20.6833	4.35331	1.6454	8.1147	9.8866	11.4236	11.8824	11.5167	10.8771	10.6168	1.40883	0.57515	31.8778	36.714	40.0615	43.6836	44.0508	43.2782	39.9443	4.84722	1.97887	6.4414	7.329	7.7503	4.0908	6.9781	0	3.5509	5.16293	2.79045	1.05469	3.2685	6.3423
	332	0.5695	215.044	C8H6N2O;C5H10N2O2;C5H12O;	HCOONa;HCOOK;NaCl_HCOONa;	0.279014	Phthalazinone; Casein K; Cucurbitine; Methyl-butanol; Amylene hydrate; Isoamyl alcohol; Methyl tert-butyl ether	3	5.2953	4.4739	4.381	4.2478	5.9349	5.4103	8.6562	7.8783	5.78471	1.65104	0.624035	4.6682	5.6609	5.3105	8.5956	10.6389	11.281	7.69252	2.87478	1.17363	4.5778	0	0	0	0	0	0.762967	1.86888	0.762967	5.6718	6.8684	7.4863	7.0979	6.693	13.2864	9.9669	8.15296	2.61846	0.989684	4.4232	4.5402
	333	0.573	234.135	C12H10O5;C6H13BNO5;C10H12N2O;	H;Na_Na;NaCl;	4.50949	Hydroxy-oxo-(hydroxyphenyl)-hexa-dienoate; 7-Hydroxy-Oxo-Chromene-Carboxylic Acid Ethyl Ester; Dehydro-Amino-6-Boronohexanoic acid; Aminoethyl-1H-indolol; Methylaminorex; Cotinine; Hydroxyl-tryptamine	3	0	1.1516	0	1.5837	0	2.2065	2.4588	0	0.925075	1.06251	0.401592	0	0	0	0	0	0	0	0	0	2.114	2.0989	2.4175	2.1929	2.8422	0	1.94425	0.992466	0.405173	0	0	0	0	0	0	0	0	0	0	0	0
	334	0.5733	612.181	C24H29N7O6S;	HCOONa;	3.08731	Co-Trimoxazole	3	5.3512	5.1688	5.9114	6.4645	6.8844	7.9167	8.571	8.879	6.89337	1.42954	0.540315	9.3735	10.4091	10.7116	9.4934	9.4193	9.8367	9.87393	0.564164	0.230319	0.8673	1.4583	2.3505	0	0	0	0.77935	0.975641	0.398304	7.9196	9.3064	11.0183	10.5893	7.9828	9.6437	8.8782	9.33404	1.19327	0.451013	8.6679	8.2929
	335	0.5752	308.092	C10H17N3O6S;C18H13NO4;C13H19NO4S;C16H15N3;	H;H;Na;NaCl;	4.28443	Glutathione; Stealthin C; Letrozole; Probenecid; Epinastine	3	136.986	141.466	137.931	176.226	208.194	236.771	230.028	208.266	184.483	41.8806	15.8294	253.869	272.612	326.099	405.389	397.955	336.087	332.002	62.3198	25.442	59.7123	64.7063	53.3201	70.2244	64.6698	0	52.1055	26.1506	10.6759	349.356	368.658	432.928	291.526	364.003	464.495	421.567	384.648	58.6921	22.1835	234.498	176.601
	336	0.5809	179.049	C5H10N2O3S;	H;	1.73137	Cys-Gly; Cysteine-Acetamide	3	59.5747	54.8392	55.659	68.5976	76.155	85.036	104.865	101.616	75.7929	19.8453	7.5008	112.294	104.457	126.76	152.882	152.187	154.328	133.818	22.3457	9.1226	26.9205	27.5844	21.829	35.0565	31.1489	25.7825	28.0536	4.56134	1.86216	154.471	136.026	167.36	128.459	136.128	199.943	163.627	155.145	24.7244	9.34496	77.4593	68.4134
	337	0.5825	162.023				Unidentified	4	30.3465	31.4629	27.808	31.8343	30.3618	37.3897	58.1934	57.5604	38.1196	12.4911	4.72118	40.3396	43.1742	50.3922	71.0003	77.6961	88.8936	61.916	20.0446	8.18316	12.2439	10.3849	8.6238	14.9748	14.2099	12.3986	12.1393	2.35976	0.963367	46.2235	63.9881	56.8589	54.1584	55.2299	108.915	77.7412	66.1593	21.2693	8.03903	29.9659	31.7568
	338	0.5825	233.06	C8H12N2O4S;C11H14O2S;C10H11Cl2N;	H;Na;NH3;	3.77585	Pralidoxime mesylate; Hydroxy-Dimethyl-(Methyl-Buta-Dienyl)-5h-Thiophenone; Thiolactomycin; Dichloro-Tetrahydro-1h-Benzo[C]Azepine	3	29.1623	28.7828	27.5773	31.6132	31.4021	34.347	52.7239	52.9372	36.0682	10.5521	3.9883	38.9723	40.195	47.2022	71.6847	76.5769	71.1621	57.6322	17.3232	7.07216	13.2941	10.6471	9.106	16.2265	13.7421	16.0865	13.1837	2.86604	1.17005	48.5806	55.9364	55.2691	51.7884	47.9409	94.5523	80.4893	62.0796	18.0995	6.84097	29.9548	31.1388
	339	0.583	144.013				Unidentified	4	9.4885	9.1828	8.3952	9.7548	8.3271	9.4881	18.6768	18.6683	11.4977	4.45785	1.68491	11.7193	12.1309	13.5269	21.8398	28.2012	26.4582	18.9794	7.4632	3.04684	4.4846	3.128	2.3436	5.3372	4.24	3.6313	3.86078	1.0587	0.432213	13.4284	16.0741	19.2918	16.9095	15.3284	33.0197	22.6803	19.5332	6.6539	2.51494	8.8694	9.6302
	340	0.5848	655.154	C20H34N8O10S2;C28H36O13;	Na_Na;KCl;	1.03792	glutathione amide disulfide; (+)-Syringaresinol O-beta-D-glucoside	3	2.9306	2.5682	2.7752	3.7762	3.3194	3.8826	0	3.7879	2.88001	1.26665	0.47875	4.2012	3.4619	5.7757	3.6714	2.632	2.177	3.6532	1.26998	0.518467	1.0841	0	0	0	2.4715	0	0.5926	1.0175	0.415393	4.9137	6.3391	5.5352	4.6175	4.7581	5.4105	5.9856	5.36567	0.644956	0.24377	3.5026	2.8578
	341	0.5857	76.0231				Unidentified	4	13.9316	13.3353	12.778	16.7592	13.3343	12.5076	26.2517	24.6641	16.6952	5.57977	2.10895	18.0405	18.283	23.7561	30.2106	32.899	32.3897	25.9298	6.842	2.79324	6.0672	4.8947	5.1031	7.1628	0	6.8106	5.0064	2.61214	1.0664	21.8849	26.8719	30.3252	25.1771	23.1398	46.2525	35.7737	29.9179	8.59748	3.24954	14.5594	15.0651
	342	0.5865	291.068	C14H12N4S;C9H16O9;	Na;Na;	1.78652	Phenylsulfanyl-Quinazolinediamine; Mannosyl-glycerate; Deoxy-glycero-galacto-nonulosonic acid	3	7.7621	7.831	7.1939	7.6777	6.8455	9.2222	12.6876	12.6595	8.98494	2.37815	0.898856	9.7591	10.4314	12.889	19.0401	20.6568	23.2847	16.0102	5.72068	2.33546	3.2292	1.889	1.8706	0	4.1635	0	1.85872	1.67934	0.685589	11.3149	14.5452	16.5032	13.639	14.2722	25.4478	20.9274	16.6642	4.88759	1.84733	8.9456	7.2885
	343	0.5873	711.13				Unidentified	4	1.7839	2.0396	2.0079	0	0	0	0	0	0.728925	1.00877	0.381278	0	0	0	0	0	0	0	0	0	4.0181	3.599	3.1867	5.128	0	0	2.6553	2.15618	0.880259	0	0	0	2.8172	0	0	0	0.402457	1.0648	0.402457	0	0
	344	0.5876	116.018				Unmatched Adduct	4	11.5305	13.5619	13.0661	13.6804	12.4932	13.0527	28.0013	28.5675	16.7442	7.15578	2.70463	16.1276	16.9093	18.7236	34.0924	37.2983	43.6829	27.8057	11.9943	4.89664	5.9673	4.1574	3.5926	8.3366	8.5597	7.5493	6.36048	2.13655	0.872243	20.2685	19.4709	24.1001	21.7428	18.3542	51.5903	33.8659	27.0561	12.0042	4.53715	10.7247	12.5121
	345	0.5896	137.047				Unidentified	4	0	4.2661	0	0	0	4.1365	0	3.7879	1.52381	2.10721	0.796451	2.4969	4.0102	0	2.6846	3.0894	0	2.04685	1.66914	0.681423	0	4.8414	6.0943	5.2921	0	0	2.70463	2.98984	1.2206	0	0	0	0	3.8877	0	3.1164	1.00059	1.72327	0.651335	0	0
	346	0.5926	290.083	C15H15NO3S;C13H17NO3S;C9H17NO8;C15H12O3S;C13H17N3;C8H15NO6;	H;Na;Na;NH3;KCl;HCOONa;	4.55042	Adrafinil; Rasagiline mesylate; Miserotoxin; Acetyl-galactosaminyl-(acetylneuraminyl)-galactosyl-; Neuraminic acid; Phenyl-(phenylsulfonyl)-propenone; Tramazoline; Acetyl-Glucosamine; Acetyl-D-hexosamine; Acetyl-D-mannosamine	3	4.0796	4.488	4.6195	5.5768	7.2371	6.6985	7.9689	8.3628	6.1289	1.66492	0.629281	6.4285	7.8343	10.1034	11.4734	11.1786	9.574	9.43203	1.96278	0.801302	0	0	0	0	0	0	0	0	0	9.2357	10.1921	10.0977	8.3031	8.6583	13.2948	12.1881	10.2814	1.84388	0.696922	5.5965	5.9548
	347	0.5949	962.246				Unidentified	4	0	1.8827	0	0	0	0	0	0	0.235338	0.665635	0.251586	1.3613	2.3438	2.5567	3.6714	0	0	1.65553	1.47768	0.60326	0	0	0	0	0	0	0	0	0	2.84	3.4843	3.1553	0	2.7804	2.628	3.9805	2.6955	1.27692	0.482632	1.4531	1.0117
	348	0.5956	80.0505	C5H5N;	H;	2.74829	Pyridine	3	12.316	11.6583	11.7917	15.596	14.7987	13.9425	16.0257	14.1621	13.7864	1.6966	0.641254	12.2581	13.5583	11.2069	12.885	14.1841	13.3536	12.9077	1.05513	0.430756	17.0395	13.7176	12.7787	0	0	9.411	8.82447	7.25468	2.96171	12.3373	15.1972	13.4314	16.2722	14.7447	15.04	16.296	14.7598	1.44629	0.546645	11.9318	13.3789
	349	0.5983	245.062				Unmatched Adduct	4	3.3904	4.4179	3.9624	4.8585	4.8005	5.8482	9.0797	7.3882	5.46823	1.9041	0.719681	5.8056	6.5143	8.0511	11.0761	11.9089	11.573	9.15483	2.70302	1.1035	0	1.3252	2.0987	0	0	0	0.57065	0.917262	0.374471	7.8494	9.7606	9.152	7.6852	7.3442	14.0651	11.5977	9.63631	2.44829	0.925368	4.7925	4.488
	350	0.601	213.068	C9H12N2O2S;C10H16S;	H;Na_Na;	1.2672	Tetrahydro-Isoquinoline-Sulfonic Acid Amide; Thiocamphor	3	0	0	1.7672	0	2.2383	0	0	0	0.500688	0.935604	0.353625	1.4015	0	0	0	0	0	0.233583	0.57216	0.233583	3.427	3.0316	3.374	0	0	0	1.63877	1.8003	0.734971	0	0	0	0	0	0	0	0	0	0	1.7027	1.7956
	351	0.6024	78.0353				Unidentified	4	2.6718	3.1555	3.0143	3.8165	4.0877	3.261	2.3118	0	2.78982	1.26323	0.477455	3.5343	0	3.114	0	0	3.2087	1.64283	1.80503	0.736899	4.0559	2.9111	3.5367	0	0	0	1.75062	1.95167	0.796767	4.0498	4.5643	0	4.9127	3.4755	4.2431	4.5515	3.68527	1.68814	0.638057	3.2223	4.0539
	352	0.6032	230.095	C9H15N3O2S;C9H12N2O2S;	H;NH3;	1.65149	Ergothioneine; Tetrahydro-Isoquinoline-Sulfonic Acid Amide	3	1.4055	2.1389	0	1.8038	0	0	0	0	0.668525	0.943293	0.356531	0	0	0	0	0	0	0	0	0	3.4485	3.1069	2.6885	0	0	0	1.54065	1.70478	0.695974	0	0	0	0	0	0	0	0	0	0	0	0
	353	0.6052	96.0452	C2H3FO2;	NH3;	2.49882	Fluoroacetate	3	1.7593	0	2.023	0	2.2783	0	0	0	0.757575	1.05471	0.398645	1.9493	1.8951	1.9175	0	0	0	0.960317	1.05212	0.429524	0	1.9831	2.6497	0	0	0	0.772133	1.21462	0.495865	2.2878	0	0	3.2632	2.6978	0	0	1.1784	1.49668	0.565691	0	2.6848
	354	0.607	615.174	C34H30FeN4O4;C28H32O14;C26H34O14;C28H37BrN4O3;C27H30O12;C20H30N6O11;	H;Na;Na_Na;NaCl;HCOONa;HCOOK;	4.4053	Heme; 1,2-Bis-O-sinapoyl-beta-D-glucoside; 1,2-di-O-sinapoyl-beta-D-glucose; 7-O-Methylvitexin 2'-O-beta-L-rhamnoside; Decuroside III; Ancriviroc; Flavonol 3-O-[alpha-L-rhamnosyl-(1->6)-beta-D-glucoside]; Protirelin tartrate	3	0	0	0	0	0	0	0	12.1475	1.51844	4.29479	1.62328	7.0916	0	9.5891	12.8407	0	0	4.92023	5.68987	2.32288	0	0	7.4669	0	0	11.207	3.11232	4.96452	2.02676	0	9.2698	9.4559	11.5148	10.26	15.7081	0	8.0298	5.89636	2.22861	0	6.0514
	355	0.6078	106.03				Unidentified	4	2.3383	2.3546	3.2423	2.3187	2.3858	2.4129	0	1.258	2.03883	0.981464	0.370958	1.5708	1.8843	2.0773	0	0	0	0.922067	1.02293	0.41761	3.2155	3.156	2.0147	2.3391	0	3.137	2.31038	1.23642	0.504768	1.9217	0	0	2.5767	2.7999	0	2.4422	1.3915	1.32804	0.501953	2.4448	2.5339
	356	0.6083	815.092	C30H34O19;	NaClx2;	3.97502	Esculoside	3	0	0	0	1.5928	0	0	0	0	0.1991	0.56314	0.212847	0	0	0	0	0	0	0	0	0	0	0	0	0	0	0	0	0	0	0	0	0	0	0	0	0	0	0	0	0	0
	357	0.6084	169.064	C12H8O;	H;	4.67279	Capillin; Dibenzofuran	3	0	1.4078	1.2505	1.6592	1.5655	1.4848	0	0	0.920975	0.771683	0.291669	0	1.0155	0	0	0	0	0.16925	0.414576	0.16925	2.6281	2.8417	2.9382	0	0	0	1.40133	1.53836	0.628033	1.1425	0	0	1.1354	1.3113	0	0	0.512743	0.642081	0.242684	1.0074	0
	358	0.6127	361.185	C18H24N4O4;C18H21N3O4;	H;NH3;	3.12858	Carbazeran; Acrinol	3	3.7419	3.5577	4.1657	4.8088	5.1515	5.5998	5.9239	5.6819	4.8289	0.91517	0.345902	3.2522	3.6607	4.5762	4.7514	0	4.3746	3.43585	1.77773	0.725756	5.1151	4.4481	5.4084	7.6272	7.9848	0	5.09727	2.8719	1.17245	3.8415	4.2279	6.5716	3.9353	4.3797	4.9468	7.0387	4.99164	1.29648	0.490024	4.2009	3.7293
	359	0.6129	86.992				Unidentified	4	2.7943	1.7897	1.6994	2.7236	0	2.7841	5.179	5.6819	2.8315	1.853	0.700367	3.0395	3.1859	3.801	7.1753	6.941	7.3096	5.24205	2.1002	0.857404	0	0	0	0	0	0	0	0	0	3.0926	5.2642	4.2084	4.4711	3.4534	11.032	6.6717	5.4562	2.73036	1.03198	1.4909	1.6884
	360	0.6139	142.034				Unidentified	4	1.6587	0	1.8844	1.9197	0	1.697	0	0	0.894975	0.960615	0.363078	2.2626	0	2.5917	6.626	6.6814	7.8429	4.3341	3.13642	1.28044	0	0	0	0	0	0	0	0	0	0	3.2623	4.5829	4.3418	3.5752	10.5909	5.905	4.6083	3.20573	1.21165	1.0296	0
	361	0.6147	187.056	C5H14Si;	HCOOK;	4.22334	Ethyl-Trimethyl-Silane	3	1.6033	2.0254	1.9934	1.8504	0	1.5634	5.635	4.7322	2.42539	1.83621	0.694021	1.6789	2.0866	2.8425	4.1033	4.0978	0	2.46818	1.57034	0.64109	0	0	0	0	0	0	0	0	0	0	3.8907	3.5893	3.4246	2.8841	7.6867	0	3.06791	2.62257	0.991238	1.6433	1.6664
	362	0.6186	58.9978				Unidentified	4	1.098	1.6212	0	1.5561	0	1.8595	2.6007	0	1.09194	0.995569	0.37629	0	1.9863	1.9075	0	0	3.6336	1.25457	1.50621	0.614908	0	0	0	0	0	0	0	0	0	2.3582	2.8287	2.5961	2.8477	2.3388	5.8945	3.6412	3.21503	1.26032	0.476355	0.9512	1.09
	363	0.6196	922.26	C31H54N7O17P3S;	H;	2.77579	Decanoyl-CoA	3	1.5136	0	1.1096	2.1941	0	0	1.5893	0	0.800825	0.904874	0.34201	3.0379	0	0	1.9437	0	0	0.830267	1.33197	0.543775	0.3252	0.4717	0	0	0	0	0.132817	0.21091	0.0861035	3.6183	2.7183	2.0926	3.9804	3.2719	2.628	2.2202	2.93281	0.711221	0.268816	0	0
	364	0.6218	364.068	C9H23NO7P2;C14H15N3O5;C11H19N3O6;C12H17N5O;C16H15NO;	Na_Na;NaCl;KCl;NaClx2;NaCl_HCOONa;	1.86778	Ibandronate; Entacapone; Ophthalmic acid; Cyclohexylmethyl Guanine; Cyheptamide	3	2.2059	3.6897	2.7326	2.7924	2.748	2.5057	0	2.0518	2.34076	1.06577	0.402823	1.8739	2.4608	3.1958	0	3.8164	0	1.89115	1.60539	0.655398	5.7699	5.9711	4.9087	5.5221	7.2943	0	4.91102	2.53113	1.03333	3.3399	3.8391	3.383	4.8653	3.5563	5.2537	2.4422	3.81136	0.96067	0.363099	1.9854	2.2269
	365	0.6267	123.054				Unidentified	4	172.032	149.45	182.839	139.713	174.789	165.574	197.567	180.81	170.347	18.6201	7.03774	165.287	193.479	146.312	144.676	167.598	159.458	162.802	17.7871	7.26155	173.959	172.254	159.821	182.422	218.558	227.622	189.106	27.4468	11.2051	149.76	161.261	165.541	205.403	177.955	186.742	205.516	178.883	21.6484	8.18234	183.111	196.97
	366	0.63	671.15	C34H28O9;C33H34N2O4S;	Na_HCOONa;NaClx2;	2.92036	Mulberrofuran C; Profenamine hibenzate	3	2.1811	1.9296	2.2721	2.2246	1.3418	0	0	0	1.24365	1.07031	0.404539	1.5997	1.8267	2.3069	0	0	2.0764	1.30162	1.03575	0.422842	1.2227	0	0	0	0	0	0.203783	0.499165	0.203783	3.2291	2.8485	2.8755	4.479	3.6665	3.4341	0	2.93324	1.40712	0.53184	1.3234	1.5416
	367	0.6347	371.115	C20H18O7;C18H21ClN2O3;C16H20N4O3S;C17H16N8;C16H14F3N3OS;C20H18N2;C15H26O3;	H;Na;Na;K;NH3;HCOOK;NaClx2;	4.04188	Sesamolin; Styraxin; Compound VII; Torasemide; Bis(Amidino-Benzimidazolyl)Methane; B 823-08; SB 221284; Trans-(Phenylcyclopropyl)-Naphthalene-2-Carboxamidine; hydroxy-dihydrolubimin;	3	0	0.9413	0.7383	1.4018	0	1.9249	1.5893	0	0.82445	0.773632	0.292406	0.5942	0.7768	1.0386	0	0	0	0.4016	0.462058	0.188634	0	0	0	2.7206	0	1.8822	0.767133	1.21765	0.497104	0	0	0	0.3589	0.3991	0.5623	0	0.188614	0.243326	0.0919684	0	0
	368	0.6378	441.119	C20H24O9S;C22H18N6O;C18H26N2O6;C21H25F3O2;C18H28O5;	H;NaCl;KCl;KCl;NaClx2;	2.9017	Hallactone B; N-[4-Methyl-3-[[4-(3-Pyridinyl)-2-Pyrimidinyl]Amino]Phenyl]-3-Pyridinecarboxamide; Atropine methonitrate; 20,21,21-Trifluoro-3-methoxy-19-nor-17alpha-pregna-1,3,5(10),20- tetraen-17-ol; 12-oxo-14,18-dihydroxy-9Z,13E,15Z-octadecatrienoic acid	3	0.8649	0.9413	0	0.9099	1.0789	1.6965	0	0	0.686438	0.625024	0.236237	0	0.4276	0	0	0	0	0.0712667	0.174567	0.0712667	2.4578	2.2634	2.0987	0	2.4715	0	1.54857	1.20733	0.492892	0.4355	0	0.4229	0.5407	0	0	0	0.199871	0.252065	0.0952717	0	0
	369	0.6424	84.0451				Unmatched Adduct	4	9.5933	9.2409	8.8763	20.367	23.7918	25.5771	19.0279	21.8594	17.2917	6.96045	2.6308	17.3867	23.2307	22.9129	16.0783	13.1596	0	15.4614	8.53613	3.48486	21.2687	26.3118	21.9819	15.4044	20.7172	20.3355	21.0032	3.49525	1.42693	11.7344	13.9299	12.2178	7.4768	25.9441	25.859	15.6818	16.1205	7.13577	2.69707	11.6577	11.0294
	370	0.6486	130.05	C5H7NO3;	H;	4.07534	Pyrroline-hydroxy-carboxylate; Oxoproline; Dimethadione (USAN/INN); N-Acryloylglycine; Pyrrolidonecarboxylic acid;;	3	4.2725	9.2198	9.0422	23.7754	25.3922	28.9477	25.1048	9.3074	16.8827	9.78106	3.69689	21.6422	25.8974	25.8315	9.8303	8.6799	0	15.3135	10.689	4.36376	25.3793	30.6164	30.262	0	15.359	0	16.9361	14.2279	5.80852	24.0435	28.7841	19.8547	8.0188	26.6321	29.6013	10.6849	21.0885	8.67686	3.27955	6.0906	11.7512
	371	0.6514	744.086	C21H28N7O17P3;C30H27N3O15;	H;KCl;	4.66344	Monophosphoadenosine-Diphosphoribose; NADP+; Nicotinamide adenine dinucleotide phosphate; enterobactin; Enterochelin	3	2.1622	2.675	3.0265	3.5029	3.8908	2.5985	0	0	2.23199	1.47828	0.558736	2.4186	3.989	3.4355	0	0	0	1.64052	1.86637	0.761941	2.9941	2.4693	0	0	0	0	0.910567	1.42037	0.579865	3.1735	3.7516	3.2138	0	3.4985	0	0	1.9482	1.83236	0.692567	0	3.1037
	372	0.657	455.091	C18H19FN6;	NaClx2;	2.13144	SB220025	3	0	0	0	0	0	0	0	0	0	0	0	0	0	0	0	0	0	0	0	0	2.2767	2.9151	2.5184	3.6548	5.5133	5.4375	3.7193	1.43839	0.587219	0	0.698	0	0	0	0	0	0.0997143	0.263819	0.0997143	0	0
	373	0.6865	775.213	C37H40N4O10;	KCl;	0.477288	Pentacarboxyl porphyrinogen III	3	9.4818	9.1434	8.1184	9.1194	8.7514	12.0119	7.882	10.4953	9.37545	1.33821	0.505796	3.3613	3.2692	0	0	0	0	1.10508	1.71224	0.699017	15.7749	13.5864	15.9746	27.2602	17.8513	42.387	22.1391	11.0113	4.49534	0	1.2869	0.9726	0	0	0	0	0.322786	0.558678	0.211161	0	0
	374	0.6908	247.141	C12H20N2O2;C9H16ClN5;C15H22;C11H24O2;	Na;NH3;Na_Na;NaCl;	4.5318	Aspergillic acid; Isamoxole; Propazine; Cuparene; Curcumene; Nootkatene; Decyloxy-Methanol	3	2.8657	2.7854	3.3328	3.9652	2.9521	4.2222	3.1787	0	2.91276	1.28583	0.485999	3.6764	4.036	4.922	2.1133	1.8424	2.2199	3.135	1.25303	0.511546	3.4512	3.5162	3.2803	0	0	0	1.70795	1.87255	0.764466	4.081	5.621	5.2761	4.3526	4.9541	0	5.3382	4.23186	1.94558	0.735361	4.5495	4.2543
	375	0.6911	379.1	C16H20O9;C13H24O10;C15H18N4O5;C15H18O7;C13H18ClF3N2O;C14H16N4O3;C14H24F2O2;C13H20N2O3;	Na;K;Na_Na;HCOONa;HCOONa;Na_HCOONa;NaClx2;NaCl_HCOONa;	1.23978	Feruloyl-glucose; Gentiopicrin; Methyl-fucopyranosyl-galactoside; Mitomycin; Mellitoxin; Picrotin; Cinnamoyl-glucoside; Mabuterol; Piromidic acid; Difluoro-dodecenyl acetate; Talbutal	3	2.3114	1.9103	1.7479	3.492	0	0	0	0	1.1827	1.36543	0.516084	0	0	0	0	0	0	0	0	0	5.4316	7.0746	4.1484	0	0	0	2.77577	3.17906	1.29785	0	0	0	0	0	0	0	0	0	0	0	0
	376	0.7141	186.024				Unidentified	4	2.5037	0	3.8311	3.9795	4.8028	4.8999	5.7109	0	3.21599	2.19519	0.829703	2.9913	3.3298	3.7604	0	3.3786	3.3401	2.80003	1.39328	0.568804	5.3739	5.4064	5.7798	6.9857	9.7245	7.4304	6.78345	1.6733	0.683121	3.9266	5.2215	5.1155	3.7493	4.2713	0	2.8922	3.59663	1.77794	0.672	0	0
	377	0.7159	312.112	C12H17N5O3S;C17H20ClNO;C15H19N3OS;C12H14N4O3S;C19H15ClO;C17H19NO;C14H23NO2;	H;Na;Na;NH3;NH3;NaCl;KCl;	4.83798	Ethylthioadenosine; Clofedanol; Butamisole; Sulfacytine; TRAM-3; Nefopam; Piroctone	3	2.5955	2.7199	2.7991	2.9379	2.9288	0	0	3.1566	2.14222	1.33254	0.503653	1.3865	1.7303	1.7315	0	0	0	0.80805	0.894063	0.365	3.1479	5.0297	4.5886	3.6652	0	0	2.73857	2.2225	0.907333	0	0	0	0.5205	1.1181	0	0	0.234086	0.435411	0.16457	1.068	1.0888
	378	0.7161	294.102	C17H17N;C11H16FN3O3;	NaCl;Cl;	2.31212	Tetrahydroprotoberberine; Azapetine; Carmofur	Tetrahydroprotoberberine; Azapetine; Carmofur	11.9563	11.87	13.9862	15.3361	16.0249	18.7709	14.5153	15.4107	14.7338	2.2459	0.848872	7.7052	9.7002	10.0821	5.3028	7.687	8.0038	8.08018	1.71155	0.698737	21.1319	26.9608	21.3318	12.9499	21.106	18.0432	20.2539	4.60167	1.87862	5.5102	6.3914	5.8713	3.759	6.489	2.3188	2.9402	4.75427	1.7186	0.649571	3.2803	6.5956
	379	0.7243	250.041				Unidentified	4	2.3599	2.3662	2.3495	3.6036	3.4228	4.5004	2.7688	0	2.6714	1.32117	0.499357	2.1584	2.2979	2.3402	1.8357	1.7108	0	1.72383	0.881203	0.35975	4.4258	5.1141	4.2885	0	0	3.45	2.87973	2.29252	0.935918	3.9601	4.6535	3.0815	3.5002	4.6942	0	2.1842	3.15339	1.64741	0.622664	3.3658	1.926
	380	0.7272	152.068				Unidentified	4	4.2872	4.8298	4.3989	3.6894	3.2801	16.2199	16.177	0	6.61029	6.10201	2.30634	13.4948	2.9933	12.8716	14.8766	13.0208	11.4934	11.4584	4.28785	1.75051	8.2357	8.6792	12.3661	13.5114	20.9698	20.0665	13.9714	5.47398	2.23474	9.5038	11.3483	9.4435	4.019	3.3614	12.3273	0	7.14333	4.66386	1.76277	8.9072	2.6469
	381	0.7284	204.035	C4H7N3O;	Na_HCOONa;	0.245055	Creatinine	3	1.3233	1.7799	1.9888	2.0163	2.4062	2.9865	2.184	0	1.83563	0.88339	0.33389	1.3716	1.3361	0	0	0	0	0.451283	0.699215	0.285453	2.631	3.1259	0	0	0	0	0.959483	1.49464	0.610185	2.0357	2.6619	0	1.5856	2.5289	0	0	1.25887	1.22787	0.46409	1.2726	0
	382	0.7303	153.042	C5H10N2O;	K;	2.41764	Amino-piperidone	3	3.5028	3.122	2.7779	3.5441	2.9242	0	0	0	1.98387	1.66299	0.628551	3.3626	3.3639	0	0	0	0	1.12108	1.73677	0.709035	0	3.2232	0	0	0	0	0.5372	1.31587	0.5372	4.2735	3.0787	2.8546	3.2601	4.681	0	0	2.59256	1.8877	0.713484	3.0797	3.3321
	383	0.7332	166.073	C9H8O3;	H;		Coumarate; hydroxy-Nonene-diynoic acid; Benzoyl acetate; Caffeic aldehyde; Hydroxycinnamate; Phenylpyruvate; trans-Hydroxycinnamate	3	1.7626	2.8857	2.8929	3.2372	0	0	4.9213	6.0281	2.71598	2.13232	0.805939	2.5998	0	0	6.3404	0	0	1.49003	2.59378	1.05891	2.3849	2.7479	0	0	7.7947	6.4692	3.23278	3.2601	1.33093	0	0	0	0	2.7654	0	4.7948	1.08003	1.9353	0.731475	2.2835	1.9753
	384	0.756	161.092	C9H14O;	Na;	2.97964	Nonadienal; Isophorone	3	0	0	0	0	0.7275	0	0	0	0.0909375	0.25721	0.0972163	1.0468	1.3218	1.1123	0	0	0	0.58015	0.641983	0.262089	0	0	0	0	0	0	0	0	0	0.6704	0	0	0	0	0	0	0.0957714	0.253387	0.0957714	1.8402	1.5731
	385	0.7569	452.134	C19H27NO8S;C24H18O8;C26H21N3O2;C21H24F3N3S;C22H23N3O4;C17H22BN2O6;C19H29NO4;C19H23N3O2;	Na;NH3;Na_Na;Na_Na;NaCl;Na_HCOONa;NaClx2;NaCl_HCOONa;	1.50398	N-Methylscopolamine methylsulfate; Knipholone; Renilla luciferin; Trifluoperazine; Erlotinib; D-Naphthyl-1-Acetamido Boronic Acid Alanine; Ankorine; Ergometrine; Ergonovine; MEGA	3	4.9988	4.9622	5.5425	6.0621	4.3567	8.2954	9.4664	10.8537	6.81723	2.40515	0.909063	8.5771	8.813	13.6488	15.8175	13.8151	15.0998	12.6285	3.15271	1.28709	2.7217	3.1228	0	0	0	0	0.974083	1.51436	0.618237	13.6911	15.487	15.9491	10.7097	12.1043	15.2975	11.0464	13.4693	2.19701	0.830391	4.4848	5.9245
	386	0.7603	405.211	C23H32O4S;	H;	4.9357	Hydroxy-mercapto-pregnene-dione acetate	3	2.8754	2.942	3.4711	3.3182	4.0598	4.1652	4.6235	0	3.1819	1.42398	0.538213	2.9913	3.8823	2.9796	4.7514	0	0	2.4341	1.99624	0.814962	4.3227	3.856	3.8654	4.8244	6.0837	0	3.82537	2.04848	0.83629	1.4698	0	0	0	1.7532	0	0	0.460429	0.790576	0.29881	1.5097	1.1562
	387	0.7603	757.093	C34H32N4O5Zn;C20H31N4O17P;	NaClx2;NaCl_HCOONa;	3.17002	Zn(Ii)-(Oxo-Protoporphyrin Ix); CMP-N-glycoloylneuraminate	3	0	2.7284	2.5502	4.8905	3.9981	0	0	3.7879	2.24439	1.99641	0.754571	3.5979	4.5478	0	0	0	0	1.35762	2.12455	0.867345	5.1044	4.6812	2.8542	0	0	0	2.10663	2.42848	0.991423	2.0141	2.8981	0	2.7656	3.3821	0	0	1.57999	1.53124	0.578756	2.5291	2.5626
	388	0.7632	434.124	C25H21N3O2;C19H22FN3O4;C18H24ClN3O2;C19H27NO3;	K;NaCl;HCOOK;NaClx2;	0.138209	Benzyl-dimethoxy-phenyl-3H-pyrazoloisoquinoline; Oxidized Renilla luciferin; Gatifloxacin; Pancopride (USAN/INN);;Glycopyrrolate;Nateglinide;Protoemetine;Tetrabenazine;;	3	0	2.3804	0	2.7604	0	2.4456	0	0	0.9483	1.31328	0.496372	2.7618	3.4978	5.3284	5.7439	7.0196	0	4.05858	2.51748	1.02776	1.4189	1.6517	0	0	0	0	0.511767	0.796236	0.325062	4.4127	5.8523	5.0321	3.9406	3.6199	7.8983	0	4.3937	2.41269	0.91191	0	2.4437
	389	0.7637	290.137	C16H19NO4;C14H21NO4;C16H16O4;C13H19NO2;	H;Na;NH3;HCOONa;	3.89471	Demethoxypiplartine; Balfourodine; Benzoylecgonine; Pseudolycorine; Pteleatine; Ribalinium; Roletamide; Zephyranthine; Codonopsine; Diethofencarb; Vestitol; Bis(hydroxy-methoxyphenyl)ethylene; Dihydroxy-methoxydihydrochalcone; 5C-aglycone; Methylalloptaeroxylin; Dihydroxy-methoxy-isoflavanol carbocation intermediate 2; Methoxy-lapachone; Eleutherin; Vestitol; Carnegine; Dioscorine; Exalamide; Ibu…	3	0	0	0	0	0	0	0	0	0	0	0	0	2.8133	0	0	0	0	0.468883	1.14852	0.468883	0	0	0	0	0	0	0	0	0	0	2.8792	0	0	0	0	0	0.411314	1.08824	0.411314	0	0
	390	0.7643	337.074	C15H14N4O2S;C9H16N4O7;C16H19ClO2;C14H12N4S;C9H16O9;	Na;Na_Na;NaCl;HCOONa;HCOONa;	1.8987	Sulfaphenazole; canavaninosuccinate; Clidanac; Phenylsulfanyl-2,4-Quinazolinediamine; Mannosyl-glycerate; Deoxy-glycero-galacto-nonulosonic acid	3	0	0.7951	0	0.8346	0	0	0	0	0.203713	0.37735	0.142625	0	0	0	0	0	0	0	0	0	0.9975	0	0	0	0	0	0.16625	0.407228	0.16625	0	0	0	0	2.1933	0	0	0.313329	0.828989	0.313329	1.6278	0
	391	0.7678	470.144	C18H24N5O8P;C21H26N3O6P;C24H20O9;C21H24ClN3O3;C22H22FN3O2;	H;Na;NH3;HCOONa;Na_HCOONa;	1.02096	Bucladesine; N-[(Furan-2-Yl)Carbonyl]-(S)-Leucyl-(R)-[1-Amino-2(1h-Indol-3-Yl)Ethyl]-Phosphonic Acid; Cinchonain 1a; Fominoben; Droperidol	3	14.7152	15.9741	16.2017	20.6852	17.8701	28.667	21.6806	25.6955	20.1862	4.981	1.88264	27.6938	32.1575	42.8949	41.8711	36.2304	40.8174	36.9442	6.061	2.47439	7.5822	9.3244	7.4212	9.1567	0	0	5.58075	4.39283	1.79337	44.5893	58.7575	59.6635	31.1913	42.3249	14.4987	31.1506	40.3108	16.1787	6.11499	8.3209	20.0601
	392	0.7698	147.045				Unidentified	4	21.6352	21.1345	20.1361	24.942	24.4849	28.5978	29.0198	34.0535	25.5005	4.76977	1.80281	20.7434	20.3996	22.7033	27.5053	26.9621	24.3661	23.78	3.03824	1.24036	29.3607	27.3306	29.7651	36.4204	36.386	36.4666	32.6216	4.24672	1.73372	9.8828	11.3014	10.4296	12.0413	10.8719	12.0693	12.7341	11.3329	1.01158	0.38234	11.0184	12.0208
	393	0.7716	165.055	C9H8O3;	H;	2.90812	Coumarate; hydroxy-Nonene-diynoic acid; Benzoyl acetate; Caffeic aldehyde; Hydroxycinnamate; Phenylpyruvate; trans-Hydroxycinnamate	3	34.8842	35.2943	33.4378	44.607	47.453	48.092	46.8146	46.3131	42.112	6.37225	2.40849	34.4221	35.301	38.9987	40.2573	37.7284	33.5003	36.7013	2.69741	1.10121	52.2457	52.7993	53.9449	49.2307	57.1981	44.6391	51.6763	4.3064	1.75808	20.7947	21.8678	22.9392	20.0462	22.4324	17.7172	21.2995	21.0139	1.75035	0.66157	20.6752	21.4005
	394	0.772	386.104	C12H23NO10;C21H17N3O;C17H26ClNO2;C13H19NO8;C14H23NO4S;C11H21NO8;C12H17N5O4;C18H23NO;	Na_Na;NaCl;KCl;HCOONa;HCOOK;Na_HCOONa;Na_HCOONa;NaClx2;	1.94248	Amino-Deoxy-Cellobiono-Lactam; (Glucosaminyl)-myoinositol; Lactosamine; CRA_8696; Butachlor; Pretilachlor; Metaraminol bitartrate; Sulfonterol; Choline hydrogencitrate; Dimethyladenosine; Bifemelane; Orphenadrine	3	0	2.0352	1.9115	0	1.2283	1.8913	0	0	0.883288	0.973949	0.368118	2.275	2.9154	2.7818	0	6.1379	8.2949	3.73417	2.97418	1.2142	0	0	0	0	0	0	0	0	0	0	3.475	4.8475	2.693	0	0	0	1.57364	2.06122	0.779066	0	0
	395	0.7721	274.094	C12H19NO2S2;C15H13N3O;	H;Na;	4.74289	Brugine; Hydroxy-Phenyl-1h-Indole-Carboxamidine	3	3.1411	0	3.3206	3.7704	4.1565	5.229	4.3962	6.7411	3.84436	1.937	0.732117	4.2318	4.9041	6.6509	6.8458	7.6511	7.8725	6.35937	1.47811	0.603437	0	2.9993	2.4654	3.8623	4.8751	0	2.36702	2.00706	0.819377	7.9059	7.7379	5.5352	3.7993	6.3886	8.3216	5.2833	6.42454	1.65855	0.626873	2.5922	3.6036
	396	0.7728	182.082				Unmatched Adduct	4	21.2766	20.2178	17.9093	24.3567	27.2735	29.438	23.6175	23.4846	23.4468	3.72629	1.40841	19.1851	22.139	24.0543	24.0645	14.9477	11.9372	19.388	5.02959	2.05332	28.0035	32.8201	29.5994	27.5384	35.3872	30.7371	30.6809	2.99807	1.22396	11.784	13.1037	13.3337	11.7954	13.1713	0	14.3969	11.0836	4.97198	1.87923	13.2867	11.8833
	397	0.7735	95.0501				Unidentified	4	7.4047	6.9054	6.8666	8.2254	7.6385	8.8953	10.7276	12.1192	8.59784	1.9037	0.719531	6.609	6.2253	7.9671	7.5842	9.3864	10.2918	8.01063	1.57684	0.643744	8.7824	7.8092	8.4497	11.7099	16.1515	14.5162	11.2365	3.48348	1.42212	2.9512	4.3741	3.9147	4.4221	3.4403	3.0917	0	3.17059	1.51372	0.572134	3.2508	4.3859
	398	0.7751	134.061				Unidentified	4	0	0	6.0403	0	0	7.4364	7.9833	9.2025	3.83281	4.18639	1.5823	0	0	6.2698	0	9.2955	4.3916	3.32615	3.96543	1.61888	0	6.5162	5.923	8.221	0	0	3.44337	3.84674	1.57042	0	4.5947	5.194	5.7226	0	0	0	2.2159	2.78285	1.05182	4.3764	0
	399	0.7755	119.05	C9H8O3;	[HCOOH];	5.5439	Coumarate; hydroxy-Nonene-diynoic acid; Benzoyl acetate; Caffeic aldehyde; Hydroxycinnamate; coumarinate; Phenylpyruvate; cyclopenta[b]pyran	3	33.5883	32.2327	29.4091	34.9846	32.5508	37.2773	42.1516	42.9176	35.639	4.82051	1.82198	26.423	29.049	30.4026	35.6049	36.1829	42.9608	33.4372	6.01001	2.45357	43.2297	36.7319	36.9147	48.8872	60.5229	62.5516	48.1397	11.3301	4.62548	15.3935	15.4278	16.3511	17.164	14.9365	19.2789	18.2877	16.6914	1.6301	0.616121	14.4367	17.6525
	400	0.7766	416.114	C16H21N3O8S;C19H20FN3O3;C19H25NO2;	H;NaCl;NaClx2;	4.54202	Cephalosporin C; Danofloxacin; Buphenine; Ethylketocyclazocine	3	0	0	0	0	0	0	0	0	0	0	0	0	0	0	0	0	0	0	0	0	0	0	0	0	0	0	0	0	0	1.3831	0	0	1.1222	0	0	0	0.3579	0.615853	0.232771	0	0
	401	0.7797	156.096				Unidentified	4	2.1287	2.6922	2.7567	2.4097	2.5808	0	0	0	1.57101	1.31482	0.496955	3.2508	3.2398	3.2136	0	0	0	1.61737	1.77178	0.723325	0	1.7745	0	0	0	0	0.29575	0.724437	0.29575	1.5759	0	0	3.1455	2.6525	0	0	1.05341	1.39317	0.526571	0	3.3648
	402	0.7798	170.083				Unidentified	4	7.1477	7.8071	6.7193	8.3314	9.301	8.7888	0	0	6.01191	3.80241	1.43718	6.8725	7.2641	8.5376	5.4895	2.4495	0	5.1022	3.25051	1.32701	9.4113	0	9.0198	8.4595	0	0	4.48177	4.91884	2.00811	6.1803	7.1712	7.0898	6.3295	7.3034	3.2463	6.1394	6.20856	1.39625	0.527734	6.7167	5.9212
	403	0.7799	282.123	C16H21NO;C16H12N2O2;C17H19N;C13H21NO2;	K;NH3;Na_Na;NaCl;	4.18255	Isobutylphendienamide; Diftalone; Perlolyrine; Dimefadane; Etifelmine; Methyl-tetrahydrobenzylisoquinoline; Tametraline; Dimethoxy-ethylamphetamine; Dimoxamine; Tigloidine	3	0	0	0	1.0935	0	0	0	0	0.136687	0.386611	0.146125	0	0	0	1.0798	0	0	0.179967	0.440827	0.179967	0	0	0	0	0	0	0	0	0	0	0	0	0	0	0	0	0	0	0	0.2573	0
	404	0.7815	238.073	C12H13N3;	K;	2.52023	Pyrimethanil	3	1.3297	1.4707	0	1.7746	0	2.6376	0	0	0.901575	1.03748	0.392129	0	2.3174	0	0	0	3.8201	1.02292	1.65441	0.67541	0	0	0	0	0	0	0	0	0	0	2.4257	0	0	2.2957	0	0	0.674486	1.15251	0.43561	0	1.0834
	405	0.7849	256.084	C15H11N3;C12H18ClN;	Na;Na_Na;	0.663844	Pyridinyl-Dihydro-Indeno[1,2-.C.]Pyrazole; Mefenorex	3	0	1.5104	0	1.4874	0	0	0	0	0.374725	0.693883	0.262263	0	0	0	0	0	0	0	0	0	0	0	0	0	0	0	0	0	0	0	2.4317	0	0	1.599	0	0	0.575814	1.01234	0.38263	0	0
	406	0.786	203.048				Unidentified	4	0	0	0	0	0	0	0	0	0	0	0	0	1.2244	0	0	0	0	0.204067	0.499859	0.204067	0	0	0	0	0	0	0	0	0	0	0	0	0	0	0	2.5533	0.364757	0.965057	0.364757	0	0
	407	0.7941	332.078	C17H15N3O2;C16H11ClN2O3;C18H13N3O;C14H15N3O3;C10H17NO5S;C10H18ClN3O2;C11H21NO3;	K;NH3;Na_Na;NaCl;HCOONa;HCOOK;NaClx2;	2.28862	GYKI 52466; Clorazepate; Tesicam; Rutecarpine; Naphazoline nitrate; Etamsylate; Methyl-CCNU; Semustine; Hexaminolevulinate	3	0	1.412	1.0371	1.8639	0	0	0	0	0.539125	0.776273	0.293404	2.0578	1.9828	2.919	0	0	0	1.15993	1.31255	0.535846	1.7888	1.5002	0	0	2.8145	0	1.01725	1.19692	0.488639	3.314	5.06	5.7954	4.2012	3.4403	0	0	3.11584	2.29852	0.86876	2.921	3.1301
	408	0.8021	428.038	C10H15N5O10P2;C12H16N5O8P;C18H19Cl2NO4;C14H15Cl2N3O4;C11H22NO7P;C18H17NO4;	H;K;Na_Na;HCOONa;NaClx2;NaClx2;	4.9061	Azido-Deoxythymidine-Diphosphate; Adenosine-bisphosphate; ADP; dGDP; Acetyl adenylate; Adenosine Phosphonoacetic Acid; GUANOSINE-O-ETHYLIDENEPHOSPHONATE; Felodipine; Imazalil nitrate; PC (3:1) Methoxy-Dimethyl-(Phenoxymethyl)Indole-Dione; Acronidine; Actinodaphnine; Cularicine; IC261	3	4.1491	4.2526	4.1169	4.7373	5.3226	6.7973	9.3941	0	4.84624	2.66149	1.00595	3.5623	5.9306	0	9.0925	4.3561	0	3.82358	3.51546	1.43518	3.8253	4.3586	4.6596	0	0	0	2.14058	2.36007	0.963494	6.76	0	0	0	6.5533	5.5216	10.5365	4.19591	4.22116	1.59545	0	2.9605
	409	0.8309	276.082	C10H17NO5;C7H9N7O;C9H15NO3;	Na_Na;HCOONa;Na_HCOONa;	0.97797	Isovalerylglutamic acid; Suberylglycine; Tetrazolyl Histidine; Ecgonine; Ethyl Oxo(Piperidinyl)Acetate; Otonecine; Pseudoecgonine	3	13.5509	3.9692	4.1525	15.6626	16.6318	11.3253	15.0223	11.636	11.4938	4.94286	1.86822	12.4529	15.1422	14.3129	15.4589	16.8615	13.7998	14.6714	1.51316	0.617746	5.9953	16.4247	14.4979	15.6914	25.2615	28.423	17.7156	8.06315	3.29177	19.7063	22.347	22	5.6442	21.9963	17.9192	8.9409	16.9363	6.83858	2.58474	15.7383	17.4486
	410	0.8442	466.113	C15H21N7O7S;C20H21N5O6;	Na;K;	4.87006	(Prolyl)-Sulfamoyl)Adenosine; Pemetrexed	3	8.0357	6.747	6.7804	7.1369	5.7926	4.6249	12.053	5.4657	7.07952	2.27216	0.858794	6.5077	5.1534	4.2108	8.3543	6.7302	7.7711	6.45458	1.55875	0.636359	5.8322	5.1546	4.8448	6.1956	0	0	3.6712	2.8836	1.17722	12.7357	12.4817	7.5607	26.0787	17.7927	17.0015	25.0445	16.9565	6.77559	2.56093	11.6811	18.3383
	411	0.8445	69.0713				Unidentified	4	2.3786	2.5796	2.7399	3.339	2.7391	3.599	0	0	2.1719	1.39828	0.5285	2.4778	3.3256	4.0867	2.0208	2.5583	0	2.41153	1.38822	0.566739	3.373	3.8946	3.5258	0	4.6646	0	2.57633	2.04499	0.834862	2.5114	0	2.7064	0	2.7999	2.4734	2.0722	1.79476	1.24732	0.471442	2.7018	2.0715
	412	0.8487	486.172	C24H25ClFN5O3;C27H29NO4S;C21H25N5O3;C15H29N5O5;	H;Na;Na_HCOONa;NaCl_HCOONa;	2.92078	Canertinib; CI-1033; Compound 19; Compound 4-D; 1-Allyl-3-Butyl-8-(N-Acetyl-4-Aminobenzyl)-Xanthine; N-[N-[1-Hydroxycarboxyethyl-Carbonyl]Leucylamino-Butyl]-Guanidine	3	0.8649	0.9936	0.8454	1.1775	1.3989	3.3126	3.0342	0	1.45339	1.13857	0.43034	1.2167	1.8171	3.7604	3.3474	3.1084	0	2.20833	1.45118	0.592442	1.0841	1.4816	0	0	0	4.8101	1.2293	1.86764	0.762461	1.1976	0	1.9452	1.7302	1.5112	2.7231	0	1.30104	1.00512	0.379901	1.4082	0.9153
	413	0.8646	524.068	C24H15N7O2S;C20H23N3O7S;	NaCl;KCl;	4.00712	(Benzothiazolyl)-Styryl-(Phthalhydrazidyl)Tetrazolium Chloride; Hydroxy-(Methoxyphenyl)Sulfonyl-Benzyloxycarbonyl-Piperazine-Carboxamide	3	6.5161	7.0419	7.6873	4.9843	7.0652	5.6481	0	8.5599	5.93785	2.64605	1.00011	4.7202	6.2504	8.1401	12.3373	14.6824	15.8911	10.3369	4.62184	1.88686	4.1473	4.2873	3.3422	0	10.8894	17.5315	6.69962	6.37769	2.60368	7.9603	0	8.1671	10.4134	6.9129	0	0	4.7791	4.59014	1.73491	12.5787	6.0807
	414	0.8782	471.152	C18H25N5O8S;C21H27N3O6S;C23H27NO6;C20H31NO7;C24H22F3N;C20H27NO4;	H;Na;NaCl;KCl;Na_HCOONa;NaCl_HCOONa;	0.550673	Gloximonam; Sarmoxicillin; Trepipam maleate; Echimidine; Heliosupine; Xaliproden; Bevantolol; Tazadolene succinate	3	0	2.6193	1.9094	0	3.3851	3.1832	0	0	1.38712	1.54482	0.583887	0	0	0	0	0	0	0	0	0	0	0	0	0	0	0	0	0	0	4.36	0	0	0	4.7972	0	0.5551	1.38747	2.19299	0.828874	3.4756	3.6561
	415	0.8823	503.152	C23H28O11;C24H24N4O7;C22H26O9;C26H27ClN2O;C24H31FO3;C20H28N2O5;	Na;Na;HCOONa;HCOOK;NaClx2;NaCl_HCOONa;	1.84835	Bruceine B; Isobrucein B; Paeoniflorin; Pafuramidine maleate; Eleganin; Graminiliatrin; Lofepramine; Dalvastatin; Enalapril; Remifentanil	3	0	2.2487	3.1825	2.847	4.4602	0	3.7566	5.9976	2.81158	2.07114	0.782818	3.318	4.2073	4.6578	3.32	4.4744	3.4038	3.89688	0.619663	0.252976	3.9231	3.5715	0	4.0776	5.3232	4.6009	3.58272	1.8581	0.758567	2.8972	4.8191	5.3625	4.2012	3.6441	4.483	3.4414	4.12121	0.851774	0.32194	3.9926	0
	416	0.9045	212.057	C7H11N3O;	NaCl;	4.66855	Diamino-hydroxylaminotoluene; Acetylaminoethyl-imidazole; Acetylhistamine	3	0	0	4.667	6.867	6.0642	6.5105	12.8919	13.0306	6.2539	4.94549	1.86922	3.7811	5.8746	6.1369	0	10.256	11.4804	6.25483	4.21228	1.71966	7.3081	5.2988	0	11.784	14.0377	17.0953	9.25398	6.25839	2.55498	8.4926	9.535	10.2974	7.1992	9.6192	0	6.2754	7.34554	3.53827	1.33734	4.7779	7.2253
	417	0.9091	542.07	C15H21N5O13P2;C28H22Cl3NO4;C26H22BrN3O4;C22H22ClN5O4S2;C15H27N3O12P2;C23H28Cl3N3O;	H;H;Na;Na;K;KCl;	3.33905	Cyclic ADP-ribose; GW 4064; Br-Coeleneterazine; Suproclone; 6-Aminohexyl-Uridine-C1,5'-Diphosphate; N-{(1s)-4-[Bis(2-Chloroethyl)Amino]-1-Methylbutyl}-N-(6-Chloro-2-Methoxy-9-Acridinyl)Amine	3	7.1723	6.9816	7.3925	7.3054	7.7927	9.2828	17.8881	14.0478	9.7329	4.04597	1.52923	7.9271	8.9537	9.0655	13.3525	16.6319	23.4218	13.2254	5.98684	2.44412	6.9113	5.035	0	11.2226	14.1833	16.7984	9.0251	6.22417	2.54101	6.2185	9.2334	7.6507	5.3894	7.1011	14.0281	7.9301	8.22161	2.84134	1.07393	7.0007	6.343
	418	0.9149	295.061	C7H14N4O6;C15H12N2O;C12H16N2O2;C12H18O;	Na_Na;NaCl;KCl;NaClx2;	0.305022	Azido-Glucopyranosyl Formamide; Methoxyphenyl-pyridineacrylonitrile; Carbamazepine; Glycosminine; Nafimidone; Phenylacetylglycine dimethylamide; Hexylphenol; Propofol	3	0.8649	1.0226	0.9511	1.5444	1.5108	0	0	0	0.736725	0.65726	0.248421	1.2797	0	0	1.8733	0	0	0.5255	0.835462	0.341076	0.843	0.9909	1.5111	0	0	0	0.5575	0.649787	0.265275	3.0068	2.7919	0	2.2216	2.6252	0	0	1.52079	1.44183	0.54496	2.0594	1.3489
	419	0.918	424.103	C22H28BrN;C23H22ClNO2;C17H25NO4;	K;Na_Na;NaClx2;	1.72128	Prifinium bromide; Licofelone; Buflomedil; Ibopamine	3	5.3155	5.3149	5.5039	7.0386	7.462	7.5748	7.7447	7.8959	6.73129	1.14893	0.434255	7.3344	8.2814	9.1192	8.3769	9.5938	8.6905	8.56603	0.77608	0.316833	4.949	6.5064	4.6228	4.4	0	5.8416	4.38663	2.2902	0.934971	14.9775	15.4951	17.6284	10.739	14.4486	10.1157	6.7804	12.8835	3.77881	1.42826	10.4854	5.824
	420	0.919	86.0967	C5H11N;C5H8;	H;NH3;	4.41364	Piperidine; Isoprene	3	32.47	23.6513	29.9871	42.4545	45.3961	44.1189	25.389	0	30.4334	14.9172	5.63818	32.0699	38.8213	38.8331	25.2346	24.2236	0	26.5304	14.4497	5.89907	42.4614	57.7465	45.374	0	23.1803	22.8229	31.9308	20.6745	8.44031	32.9917	27.4461	33.0821	27.1811	39.2123	14.1197	0	24.8619	13.4485	5.08304	31.7686	14.0093
	421	0.9262	202.181				Unidentified	4	1.8379	0	1.638	2.8345	3.2623	2.661	3.6298	4.6281	2.56145	1.41044	0.533096	2.7884	2.7337	2.8762	2.6373	0	0	1.83927	1.4268	0.582488	3.6584	3.9142	4.4001	3.5406	3.7823	3.2924	3.76467	0.377089	0.153946	4.1742	6.6195	6.5396	3.9252	4.9951	5.7237	5.739	5.38804	1.06819	0.403737	3.5154	2.4976
	422	0.9289	664.114	C21H27N7O14P2;C29H32ClNO10;C20H28N7O9PS;	H;KCl;Na_HCOONa;	4.24626	Ribofuranosylnicotinamide Adenine Dinucleotide; Cpad;NAD+; Nicotinamide adenine dinucleotide; Biotinyl-AMP	3	58.6188	53.7477	62.3542	79.8106	80.6546	73.8817	65.7875	104.131	72.3733	16.1006	6.08545	79.7684	87.9766	69.4227	108.165	119.097	150.409	102.473	29.7476	12.1444	56.0632	62.6979	48.3628	85.1407	95.2454	97.5306	74.1734	21.1458	8.63273	70.9354	82.3712	110.04	70.8621	87.478	82.6546	64.0383	81.1972	15.1736	5.73509	80.9609	45.9253
	423	0.9349	258.063	C11H13N3O2;C11H16ClNO;C8H13N3O3;	K;Na_Na;NaCl;	4.37878	Amino-(Amino-1h-Indolyl)Propanoic Acid; Clorprenaline; Methylidene-one; Glutamyl-aminopropiononitrile	3	11.7741	10.27	11.0622	15.8737	15.1896	7.6459	7.9351	0	9.96883	5.00826	1.89294	14.1711	14.4602	15.6845	16.1507	16.8841	18.3178	15.9447	1.54749	0.63176	16.2223	14.3215	12.2257	12.997	0	9.3652	10.8553	5.78519	2.36179	19.9238	24.4732	21.2089	18.0025	20.6988	0	9.2722	16.2256	8.57632	3.24154	15.7864	18.0446
	424	0.9356	194.048	C6H11NO4S;	H;	3.91657	N-acetyl-DL-methionine	3	5.1726	4.5521	2.7816	5.3943	5.2438	5.6873	0	0	3.60396	2.39785	0.9063	3.4354	4.9896	4.206	6.0169	0	10.3442	4.83202	3.39128	1.38448	6.5102	4.0433	0	9.4164	10.0631	9.9047	6.65628	4.02323	1.64248	7.3467	9.0467	7.0451	7.3697	7.0849	8.4928	8.5726	7.85121	0.825092	0.311856	2.8835	7.0944
	425	0.9363	304.069	C15H11N3O3;C13H13N3O3;C11H13N3O2;C11H16ClNO;C11H15NO;	Na;Na_Na;HCOOK;Na_HCOONa;NaCl_HCOONa;	4.63712	Nitrazepam; Methyleneamine-Hydroxy-Benzylidine-Oxo-Dihydro-Imidazolyl-Acetaldehyde; Bemoradan; Cyclobendazole; Lenalidomide; Amino-(Amino-1h-Indolyl)Propanoic Acid; Clorprenaline; Ethylaminobenzylmethylcarbonyl Group;Phenmetrazine;Valerianine;;	3	14.8663	13.7603	14.2024	17.8794	19.5848	11.7895	18.2907	0	13.7967	6.16504	2.33017	17.1943	17.8227	20.2297	21.0022	18.1054	0	15.7257	7.84401	3.2023	18.4366	19.6063	6.5802	0	0	0	7.43718	9.33535	3.81114	26.9492	24.2757	27.8327	21.7522	26.7565	0	10.2014	19.6811	10.5826	3.99984	19.8495	19.4404
	426	0.9397	322.08	C10H16N3O7P;C16H20BrNO;C10H13N2O7P;C11H17NO2;	H;H;NH3;NaCl_HCOONa;	0.217337	Deoxy-methylcytidylate; Phosphoric Acid Mono-[Amino-(Methyl-Dioxo-Dihydro-2h-Pyrimidinyl)-Tetrahydro-Furanylmethyl] Ester; Quindonium bromide; Thymidine -cyclic monophosphate; Dimethoxyamphetamine; Deterenol	3	35.445	35.1365	32.2305	46.1936	51.2685	32.3042	11.0453	0	30.453	17.0652	6.45002	41.7757	50.7315	52.5843	45.7416	0	55.5599	41.0655	20.7121	8.45566	41.0641	42.9886	21.8124	7.5081	0	0	18.8955	19.6173	8.00871	66.7571	66.4086	65.7946	60.3599	68.1116	36.6956	0	52.0182	25.4407	9.61567	53.214	49.5802
	427	0.9423	286.058	C13H11N3O2;C9H13N3O4;C11H14ClN;C11H13N;	Na_Na;NaCl;Na_HCOONa;NaCl_HCOONa;	2.13244	SU9516; Deoxycytidine; Torcitabine; Lorcaserin; SK&F 86466; Pargyline	3	10.0076	10.7814	10.2261	15.7776	15.1998	5.4254	0	9.0292	9.55589	5.09021	1.92392	11.8659	14.2506	14.6442	15.5391	7.0444	16.9837	13.388	3.53374	1.44264	14.7567	13.9203	4.4552	0	0	0	5.52203	7.04878	2.87765	19.369	12.9364	20.0623	2.8405	20.9851	9.3995	0	12.2275	8.51673	3.21902	13.9962	15.8967
	428	0.944	985.192	C33H44N7O19P3S;C28H49N8O17P3S;	NH3;Na_HCOONa;	1.8778	Piperoyl-CoA; Phenylpropionyl-CoA	3	8.1643	8.2754	7.6873	10.7938	6.3768	6.9266	7.6857	0	6.98874	3.11013	1.17552	8.5702	12.5581	14.2839	13.0099	0	15.22	10.607	5.67516	2.31687	7.8844	7.8752	4.1453	6.2863	0	4.3918	5.09717	2.97607	1.21497	15.8601	5.1755	16.5765	3.3178	15.2065	0	9.1911	9.3325	6.71021	2.53622	15.718	10.274
	429	0.9456	240.053	C11H14ClN;C7H16ClNO2;	Na_Na;NaCl;	1.79128	Lorcaserin; SK&F 86466; Acetylcholine chloride	3	7.1804	6.2651	5.3954	9.6213	8.155	5.3927	6.0965	0	6.0133	2.82751	1.0687	5.6249	8.7047	7.7272	4.4551	7.4397	12.5564	7.75133	2.81006	1.1472	7.0869	7.2812	6.9709	5.7649	11.8081	8.1123	7.83738	2.08618	0.851679	10.4636	11.4996	10.7099	10.0501	12.5441	7.5337	4.7145	9.64507	2.66396	1.00688	8.4403	8.8613
	430	0.9484	305.1	C15H14N4O2;C12H18N4O3;C13H16N4O2;C9H18N4O4;C13H16O4;C14H12N4;C11H16N4O;	Na;K;Na_Na;NaCl;HCOONa;HCOONa;HCOOK;	3.40872	Hydroxy-Methoxy-Phenyl-1h-Benzoimidazole-Carboxamidine; Methoxyphenoxy-Quinazolinediamine; Deaza-Aza-Deoxy-(Methylene)-Immucillin-H, [9-Deazahypoxanthinyl)Methyl]-4-Hydroxymethyl-Pyrrolidinol; Lysine-p-nitroanilide; Diaveridine; Octopine; Carboxyethylarginine; Dimethylallyl-hydroxymandelic acid; Azarole; Lidamidine	3	16.4337	3.1499	19.2533	25.2346	25.4544	13.3652	20.9419	30.2868	19.265	8.45794	3.1968	24.119	28.5677	29.983	33.4086	28.6021	30.7674	29.2413	3.0772	1.25626	21.8702	23.0495	15.3052	28.5522	26.271	22.1041	22.8587	4.53206	1.85021	33.6265	36.6589	34.4343	26.4936	34.721	37.1226	37.4726	34.3614	3.76739	1.42394	30.4748	24.8175
	431	0.9517	453.172	C22H27ClN4O3;C20H26N6O4;C25H28O5;C21H24N2O5;C16H33O7P;C24H26O3;C21H27FO4;	Na;K;Na_Na;HCOONa;HCOOK;Na_HCOONa;Na_HCOONa;	0.264804	Avizafone; Batelapine maleate; diprenylchalconaringenin; -geranylchalconaringenin; Diprenylnaringenin; Abyssinone V; Toborinone; PA(13:0/0:0); Oxo-(Tetramethyl-Tetrahydro-Naphthalenyl)-Propenyl]-Benzoic Acid; Epoxy-fluoro-hydroxypregnenedione	3	6.0397	0	5.6514	7.4172	6.4934	5.3155	0	2.2096	4.14085	2.9655	1.12085	6.3324	7.0369	6.7572	6.3457	0	0	4.41203	3.42779	1.39939	5.9547	7.035	3.7796	0	0	0	2.79488	3.23626	1.3212	8.8877	7.8522	10.6952	10.5893	9.1874	0	0	6.74454	4.71089	1.78055	8.2585	9.0499
	432	0.9567	222.043	C7H11NO5S;	H;	3.46781	S-(3-oxo-3-carboxy-n-propyl)cysteine	3	1.864	1.767	2.3707	2.3913	2.155	0	0	0	1.3185	1.11303	0.420685	1.9419	0	0	0.609	0	0	0.42515	0.781964	0.319236	2.3999	2.1587	0	0	0	0	0.759767	1.17949	0.481527	3.1473	2.5891	0	3.0202	3.0832	0	0	1.6914	1.59221	0.601799	2.6605	2.8877
	433	0.9591	571.141	C24H30O13;C23H28O11;C24H24N4O7;	Na_Na;Na_HCOONa;Na_HCOONa;	2.46874	Inumakilactone A glycoside; Bruceine B; Isobrucein B; Paeoniflorin; Pafuramidine maleate	3	0	0	0	0	0	0	0	0	0	0	0	0	0	0	0	0	0	0	0	0	0	0	0	0	0	0	0	0	0	0	0	0	0	0	0.4638	0	0.0662571	0.1753	0.0662571	0	0
	434	0.9632	102.056				Unmatched Adduct	4	5.9091	6.2167	6.5396	7.1885	7.7896	0	11.9277	13.6984	7.4087	4.13157	1.56159	7.1278	7.6137	5.9785	10.2513	12.0151	12.5713	9.25962	2.7409	1.11897	7.1719	5.6635	4.7302	9.3382	10.638	13.0789	8.43678	3.16976	1.29405	6.3643	8.8675	5.2113	8.3436	9.3003	15.3098	11.8015	9.31404	3.38653	1.27999	7.4965	6.9396
	435	0.9634	294.156				Unidentified	4	1.1692	0	1.2832	0	0	0	0	0	0.30655	0.568437	0.214849	0	0	0	0	0	0	0	0	0	2.7796	2.8836	1.6874	1.6849	0	0	1.50592	1.27443	0.520283	0	0	0	0	0	0	0	0	0	0	0	0
	436	0.965	276.14	C13H17N5O2;C11H22N3O3P;C16H19N3;C13H14N4O2;	H;H;Na;NH3;	1.9917	Cipamfylline; Meturedepa; Fenapanil; Prinoxodan	3	1.4962	2.1849	1.7189	0	0	0	3.4315	0	1.10394	1.30891	0.494723	0	0	0	0	0	0	0	0	0	3.9398	0	0	0	6.8366	7.8963	3.11212	3.64695	1.48886	0	0	0	0	0	0	0	0	0	0	0	0
	437	0.9677	710.124	C23H34N5O14P;	KCl;	1.23922	Tenofovir disoproxil fumarate	3	4.3107	4.4374	4.2136	5.3746	6.6682	7.8611	0	6.7115	4.94714	2.40315	0.908307	4.6847	6.06	7.357	4.6509	4.5183	0	4.54515	2.4856	1.01474	5.8385	5.7198	5.565	4.6051	5.5133	5.6466	5.48138	0.444422	0.181434	5.4481	5.3168	7.1113	5.1622	5.3341	6.2553	4.0856	5.53049	0.943281	0.356527	4.211	3.8909
	438	0.9689	344.135	C14H25N3O2S;C13H23N3O4;C15H21N3O;C15H23N;	Na_Na;NaCl;HCOOK;NaCl_HCOONa;	4.50403	Carboxy-(Pentyl)Hexylsulfanyl-Triazole; Leu-Gly-Pro; Primaquine; Prolintane	3	3.4167	4.3971	4.4325	4.518	4.7608	5.745	5.0651	6.0329	4.79601	0.825935	0.312174	1.4842	0	2.7735	0	2.3688	2.2199	1.4744	1.21583	0.49636	7.0242	7.3394	6.271	10.2391	7.2457	8.7427	7.81035	1.43502	0.585843	1.8663	0	0	0	1.6837	0	0	0.507143	0.867714	0.327965	0.9432	1.3159
	439	0.9705	148.06	C5H9NO4;	H;	0.27016	Glutamate; Iso-glutamate; Methyl-Aspartic Acid; Oxo-hydroxy-aminovalerate; Hydroxyglutamate semialdehyde; L-threo-Methylaspartate; Carboxymethyl-alanine; Acetylserine; Hydroxy-Isopropyloxamic Acid;	3	34.8779	39.5882	38.3003	49.5018	46.862	40.5287	59.0985	71.8113	47.5711	12.4504	4.70581	43.1038	51.3052	54.322	66.7704	56.8719	61.6489	55.6704	8.23637	3.36248	44.5124	41.7156	35.3612	56.3524	71.0923	10.9677	43.3336	20.2739	8.27678	55.2644	58.4827	56.5671	55.1907	59.2526	89.2306	67.4767	63.0664	12.2795	4.6412	52.4231	48.9267
	440	0.9722	326.123	C19H17N3O;C16H21N3O2;C15H16O7;C17H19N3O;C13H21N3O3;	Na;K;NH3;Na_Na;NaCl;	2.51437	Evodiamine; Zolmitriptan; Allamandin; Cianidanol; Ofornine; Phentolamine; Carbuterol	3	14.7718	14.4867	16.5686	17.937	19.8546	20.6019	22.3764	24.0087	18.8257	3.48117	1.31576	8.5211	10.126	9.1174	8.581	8.7095	11.8498	9.48413	1.30277	0.531852	30.7347	30.1248	27.7684	36.7573	42.9148	39.6506	34.6584	6.01526	2.45572	7.4802	7.6642	6.8562	4.0397	5.949	6.0063	4.2499	6.03507	1.44875	0.547577	3.7091	5.7726
	441	0.983	648.14	C29H32ClNO10;C20H37NO15;	NaCl;NaClx2;	2.3606	Novclobiocin 104; H TYPE I TRISACCHARIDE	3	2.0135	2.0396	2.1654	2.4036	2.1104	0	0	0	1.34156	1.11713	0.422236	0	2.4608	0	0	0	0	0.410133	1.00462	0.410133	2.4746	2.3673	0	0	0	0	0.806983	1.25063	0.510569	2.8956	0	0	2.8209	3.5435	0	0	1.32286	1.66577	0.629601	2.4754	2.2431
	442	0.9842	436.194	C17H31N3O2;	NaCl_HCOONa;	1.21505	Palustrine	3	3.2618	0	3.3503	3.8855	3.7194	2.7848	2.4563	0	2.43226	1.57009	0.593437	3.458	4.5894	4.4565	0	0	0	2.08398	2.31615	0.945566	4.378	3.4099	1.7759	0	0	0	1.59397	1.9341	0.789594	5.6368	4.9082	3.2984	4.7835	5.547	0	0	3.45341	2.48032	0.937473	4.6275	4.1067
	443	0.986	968.212	C33H48N9O17P3S;	H;	4.68905	Coa-S-Acetyl Tryptamine	3	4.4773	5.2765	5.4973	5.4504	6.2602	5.4103	4.9125	0	4.66056	1.9509	0.737373	6.458	9.5958	7.9483	5.8542	0	8.3949	6.3752	3.4014	1.38862	4.5441	3.599	0	0	0	0	1.35718	2.12367	0.866986	6.3354	7.5811	6.3632	7.6363	5.9023	8.0651	7.2654	7.02126	0.816131	0.308469	7.1678	5.8914
	444	0.9913	193.065	C9H9BO4;	H;	2.4344	Carboxyvinyl-Phenylboronic Acid	3	1.5467	1.4989	1.2681	2.1944	2.0457	0	2.9976	0	1.44392	1.03879	0.392626	2.1511	3.8031	2.4987	3.8996	4.515	5.1797	3.67453	1.16125	0.474079	0.8202	0	1.0548	0	0	0	0.3125	0.489774	0.199949	5.693	4.1173	4.2735	3.6635	4.3028	7.5197	4.7251	4.89927	1.31738	0.497923	3.7706	2.7342
	445	0.9929	524.108	C20H27N3O9S;C19H25N3O7S;C20H21ClFN5O3;C22H25Cl2N3O2;C22H23NO6;	K;HCOOK;Na_HCOONa;Na_HCOONa;NaCl_HCOONa;	4.48381	Methicillin Acyl-Serine; Penicillin G Acyl-Serine; 8-(2-Chloro-3,4,5-Trimethoxy-Benzyl)-2-Fluoro-9-Pent-4-Ylnyl-9h-Purin-6-Ylamine; Amustaline; Aureothin	3	0	0	0	7.3316	0	0	18.428	0	3.21995	6.65903	2.51688	11.2196	0	14.0938	0	16.0756	17.6549	9.84065	7.91966	3.23319	0	0	0	4.9706	0	1.6731	1.10728	2.00747	0.819546	21.0325	21.4389	17.0373	17.6692	13.9605	0	8.7011	14.2628	7.64938	2.89119	12.5787	14.0722
	446	0.9947	176.039				Unidentified	4	2.5454	2.5246	2.0283	3.1421	3.1315	2.7951	0	4.5854	2.59405	1.29015	0.487632	3.0103	3.899	3.0366	5.3627	0	0	2.55143	2.15336	0.879104	2.3321	3.0825	3.0043	0	0	0	1.40315	1.55906	0.636483	4.5868	4.986	4.3435	3.9815	4.5994	7.8182	5.2336	5.07843	1.27498	0.481899	3.4289	3.027
	447	0.9958	158.046				Unidentified	4	2.6241	2.6535	2.8859	3.7272	3.9079	3.8905	0	0	2.46114	1.6079	0.607731	3.3998	3.8645	3.6544	0	0	0	1.81978	1.9989	0.816047	3.9486	3.4535	2.1773	0	0	0	1.59657	1.84199	0.751988	4.5212	4.968	3.8249	3.9844	4.9534	3.7045	3.2234	4.16854	0.663341	0.250719	4.2046	3.5973
	448	1.0002	241.083	C10H12N2O5;C10H9NO5;C10H14O;	H;NH3;Na_HCOONa;	4.56279	Dinoseb; Methyl-hydroxy-(carboxy-oxopropenyl)-1H-2-pyridon; Amino-hydroxyphenyl)-dioxobutanoate; Dihydro-dihydroxykynurenate; Malonylanthranilate; Isopiperitenone; Carvone; Menthofuran; Sabinone; Decatrienal; Butylphenol; Isopropyl-methylphenol; Adamantanone; Carvacrol; Chrysanthenone; Isopiperitenone; Menthofuran; Myrtenal; Cumic alcohol; Perillyl aldehyde; Pinocarvone; Piperitenone; Safranal; T…	3	3.0544	3.4758	3.0293	3.4324	3.8391	3.3539	0	0	2.52311	1.57784	0.596369	3.109	3.6575	4.6207	5.7124	0	0	2.84993	2.37877	0.971131	3.3816	3.9046	4.0074	2.0983	2.4265	0	2.6364	1.50516	0.614478	4.8778	0	3.6129	3.9377	4.1282	2.8643	0	2.77441	1.98814	0.751444	4.454	3.7159
	449	1.0002	269.079	C9H17O7P;C8H16N2O6S;C14H14O4;C13H12O2;C10H16O3;	H;H;Na;HCOONa;HCOOK;	1.56088	DHAP; Homolanthionine; Columbianetin; Decursinol; Marmesin; Nodakenetin; Phthalofyne; Dihydroxy-dihydrofluorene; Bisphenol F; (Benzyloxyl)phenol; Hydroxyphenyl-methane; Dehydrotremetone; Safynol; Isopropenyl-oxoheptanoate; Trimethyl-dioxabicyclo[3.2.2]nonan-one; Hydroxy-campholide; Oxo-decenoic acid	3	2.2528	0	0	0	0	0	0	0	0.2816	0.796485	0.301043	2.3109	2.0897	0	0	0	0	0.733433	1.13838	0.464742	2.0056	0	0	0	0	0	0.334267	0.818783	0.334267	2.7927	3.8234	3.7157	2.9682	3.6939	0	0	2.4277	1.70406	0.644076	2.5921	2.8658
	450	1.0027	344.065	C10H16N3O7P;C16H20BrNO;C11H15N3O6;	Na;Na;NaCl;	0	Deoxy-methylcytidylate; Phosphoric Acid Mono-[Amino-(Methyl-Dioxo-Dihydro-2h-Pyrimidinyl)-Tetrahydro-Furanylmethyl] Ester; Fluorophenyl-Hydroxy-(Pyridinyl)-1h-Pyrrolo[3,2-B]Pyridine; D-Glucopyranuronosyloxy-methylisoxazole; Acetylcitrulline	3	0	0	0	0	0	0	0	0	0	0	0	0	0	0	0	0	0	0	0	0	0	3.7081	0	0	0	0	0.618017	1.51383	0.618017	0	0	0	0	0	0	0	0	0	0	0	0
	451	1.0051	770.197				Unidentified	4	0.5999	0.4184	0	0	1.1191	0.6496	0	0	0.348375	0.420609	0.158975	0	0	0	0	0	0	0	0	0	0	0	0.2518	0	0	0	0.0419667	0.102797	0.0419667	0	0	0	3.5846	0	0	0	0.512086	1.35485	0.512086	0	1.9752
	452	1.0114	327.083				Unidentified	4	0	7.7554	7.597	9.0847	0	0	0	0	3.05464	4.23836	1.60195	6.3664	0	0	0	0	0	1.06107	2.59907	1.06107	10.7167	0	0	0	0	0	1.78612	4.37507	1.78612	8.9821	5.8196	0	7.8925	9.0527	0	0	4.53527	4.37432	1.65334	5.9629	8.4853
	453	1.0137	631.164	C22H40N2O12S;C30H32ClF3NO3;	KCl;HCOOK;	2.50328	Isoprenaline sulfate; Fluperamide	3	1.892	2.408	2.7028	2.8069	2.1823	0	0	0	1.499	1.27326	0.481248	3.1313	3.0612	0	0	0	0	1.03208	1.59905	0.65281	2.9223	2.1607	0	0	0	0	0.847167	1.33434	0.544742	2.3953	0	0	2.7656	2.5508	0	0	1.10167	1.37821	0.520916	2.1925	2.6566
	454	1.0193	287.088	C16H12N2O2;C12H19O3P;C10H16N2O4;	Na;Na_Na;NaCl;	3.13504	Diftalone; Perlolyrine; Diethyl Methylbenzylphosphonate; ATPA; Prolylhydroxyproline	3	0	1.6735	0	0	3.6379	0	0	0	0.663925	1.33676	0.505249	0	3.607	0	0	0	0	0.601167	1.47255	0.601167	2.2107	2.4693	0	0	0	0	0.78	1.21113	0.494444	0	0	2.6582	2.9071	0	0	0	0.795043	1.35969	0.513916	0	2.7697
	455	1.1098	469.107	C23H24Cl2N2O3;C20H24O10;C13H24N2O11;C19H22O8;	Na;Na_Na;HCOOK;Na_HCOONa;	2.68595	Solabegron; Ginkgolide B; Ginkgolide J; Rutarin; Macrozamin; Hydroxyvernolide	3	0	0	0	0	0	0	0	0	0	0	0	0	0	0	0	0	0	0	0	0	0	0	0	0	0	0	0	0	0	0	0	0	0	0	0	0	0	0	0	0	0
	456	1.1601	84.0452				Unidentified	4	10.1362	6.2395	10.6299	11.9711	11.0141	1.9622	0	0	6.49413	5.15124	1.94699	12.8519	4.3601	0	0	2.725	2.4646	3.7336	4.77584	1.94973	10.6261	11.7403	3.2326	10.6889	10.1472	0	7.73918	4.87948	1.99204	11.7344	4.591	0	16.2563	5.7269	0	0	5.47266	6.40557	2.42108	11.6577	11.7696
	457	1.1619	775.217				Unidentified	4	0	0	0	0	0	0	0	0	0	0	0	0	0	0	0	0	0	0	0	0	0	0	0	0	0	0	0	0	0	0	0	0	0	0	0	0	0	0	0	0	0
	458	1.205	632.101	C26H29NO10;	NaClx2;	3.41717	Dihydrocarminomycin	3	0	2.3405	0	0	0	0	0	0	0.292563	0.827492	0.312762	1.9196	0	0	0	0	0	0.319933	0.783673	0.319933	0	3.3383	0	0	0	0	0.556383	1.36286	0.556383	0	0	0	0	0	0	0	0	0	0	0	0
	459	1.2365	130.05	C5H7NO3;C5H4O3;	H;NH3;	4.84427	Pyrroline-hydroxy-carboxylate; Oxoproline; Dimethadione (USAN/INN); N-Acryloylglycine; Pyrrolidonecarboxylic acid;;	3	9.5865	8.6387	10.4392	12.2853	14.4656	0	10.9613	0	8.29707	5.41302	2.04593	12.9345	14.4126	6.798	0	8.1354	0	7.04675	6.156	2.51318	18.2273	19.5369	0	14.1709	0	16.0214	11.3261	8.96374	3.65943	11.8073	0	0	14.6822	7.5215	0	0	4.85871	6.40706	2.42164	13.4201	12.8799
	460	1.2494	231.046				Unidentified	4	3.3734	5.1728	0	0	3.7164	0	15.2957	15.3812	5.36744	6.45881	2.4412	2.3845	0	4.623	4.4861	7.2159	5.7768	4.08105	2.5571	1.04393	8.4131	0	0	0	23.6789	17.2921	8.23068	10.2374	4.1794	0	0	5.5358	0	3.2266	7.484	6.792	3.2912	3.35096	1.26654	0	1.8307
	461	1.2565	595.15	C25H30N4O9S2;C22H36N2O10S;C27H30N2O6S;C23H32O10;	H;KCl;HCOOK;NaCl_HCOONa;	2.85642	Sultamicillin; Orciprenaline sulfate; Tobicillin; Paucin	3	0	0	0	1.231	0	0	6.3577	4.3798	1.49606	2.4846	0.939091	0	0	0	0	1.4574	0	0.2429	0.594981	0.2429	1.6533	0	0	7.7937	0	14.8863	4.05555	6.10561	2.4926	0	0	0	0	0	3.8647	0	0.5521	1.46072	0.5521	0	0
	462	1.2639	267.148	C17H18N2O;C14H24O;	H;NaCl;	1.53473	Borreline; Pyronine Y; Tetradecadienal	3	4.2555	3.4627	4.0557	3.0777	6.4351	4.8561	3.4677	0	3.70131	1.82991	0.69164	2.8979	3.0612	4.0601	0	0.9212	0	1.8234	1.74087	0.710705	7.1303	7.199	6.8471	8.0751	0	3.9735	5.5375	3.05162	1.24582	4.6558	4.6803	5.1258	2.9313	5.7252	2.4734	3.0367	4.08979	1.25703	0.475113	2.9587	3.5957
	463	1.2685	484.117	C21H23N3O7S;C16H27NO12;C22H25NO4S;C14H23N3O10;	Na;NaCl;HCOOK;Na_HCOONa;	3.75942	Lenampicillin; Hyaluronic acid; Adrogolide; Pentetic acid	3	21.736	21.7285	21.9444	29.2345	30.4375	25.3095	33.6467	41.4678	28.1881	6.99926	2.64547	11.724	13.0045	15.2084	9.4762	18.443	23.4979	15.2257	5.08002	2.07391	39.0281	41.2429	33.1282	56.103	66.5693	82.821	53.1488	19.0328	7.77013	17.2961	18.6424	18.8055	12.9141	19.708	24.9568	0	16.0461	7.91638	2.99211	10.7857	9.9811
	464	1.2691	613.158	C20H32N6O12S2;C24H32O12S;C18H34N2O13;	H;HCOONa;NaCl_HCOONa;	1.14163	Glutathione disulfide; Oxidized glutathione; Oxiglutatione; Estriol 3-sulfate 16-glucuronide; Glucosylgalactosyl hydroxylysine	3	103.549	112.731	102.246	132.623	134.629	108.558	161.796	189.739	130.734	31.2402	11.8077	47.3979	50.4677	52.0281	65.6152	87.3668	89.9425	65.4697	19.0302	7.76906	198.031	199.021	161.273	401.6	307.34	344.343	268.601	96.1947	39.2713	58.0691	63.0984	64.1591	48.4992	57.2189	100.186	59.2028	64.3476	16.6025	6.27516	35.7346	42.1201
	465	1.2698	586.154	C31H34BrNO4;C29H25N3O5;	Na;Na_HCOONa;	2.47375	Fentonium bromide; Nicomorphine	3	0	0	0	0	0	0	0	0	0	0	0	0.9014	0	0	0	0	0	0.150233	0.367995	0.150233	0	0	0	0	0	0	0	0	0	0	0	1.9838	1.6761	0	0	0	0.522843	0.897331	0.339159	1.0065	0
	466	1.271	235.023	C7H8N4O3;C9H8N2O2;C6H14S2;C6H6N4O;C6H14O2;	K;NaCl;HCOOK;HCOOK;NaClx2;	2.0849	Dimethyluric acid; Hydroxyaminoquinoline N-oxide; NU1025; Pemoline; Phenylhydantoin; Dipropyl disulfide; Deazaguanine; Hexane-Diol; Hexylene glycol	3	4.6414	4.5477	4.3507	6.2784	5.7021	2.8538	8.4374	5.8926	5.33801	1.65558	0.62575	2.7898	3.1485	3.5972	0	3.1532	0	2.11478	1.65799	0.676873	6.6047	6.0083	6.5682	10.5786	12.3558	14.399	9.4191	3.53412	1.4428	2.9913	3.1802	3.6331	2.9505	2.4791	3.1832	0	2.63106	1.21023	0.457422	1.7464	0
	467	1.272	355.075	C20H14O4;	Cl;	4.61875	O-Methyltetrangulol; Phenolphthalein	3	29.8606	26.005	24.9071	32.9881	35.9813	31.4641	40.3418	45.8562	33.4255	7.10396	2.68504	16.7327	18.5184	19.3377	18.8622	21.9821	23.3145	19.7913	2.41896	0.987536	42.7397	45.5518	42.5731	55.8614	66.3648	72.1844	54.2125	12.771	5.21375	20.1572	25.8813	23.0033	19.094	18.7221	19.3656	18.6691	20.6989	2.73381	1.03328	13.8887	13.6961
	468	1.2747	257.08	C13H14O4;C10H18O5;C12H12O2;C9H16O3;	Na;K;HCOONa;HCOOK;	2.80069	Acetoxychavicol acetate; Hydroxydecanedioic acid; Hydroxysebacic acid; Dodecatriynoic acid; Dihydro-dihydroxybiphenyl; Caproyl propionic acid; Oxo-nonanoic acid; Valeryl butyric acid; Propionyl-caproic acid; Methyl-oxo-octanoic acid; Oxo-nonanoic acid; Hydroxy-nonenoic acid; Oxononanoic acid; Butyrl-valeric acid; Heptanoyl acetic acid	3	5.8449	4.7736	4.6214	6.4974	5.7744	6.3937	8.4448	7.932	6.28528	1.35965	0.5139	2.9277	3.279	3.9688	0	2.4414	0	2.10282	1.70318	0.695319	7.9329	7.3412	7.1686	11.0195	11.5569	15.1781	10.0329	3.15051	1.28619	3.5638	4.7088	4.4544	4.1042	3.5206	0	3.9964	3.47831	1.59346	0.602272	2.5344	2.7726
	469	1.2771	409.086	C19H16N4O4;C18H22O5S;C14H16N2O8;	Na_Na;NaCl;HCOONa;	2.54225	Zidometacin; ;Estrone sulfate; Deoxy-Guanidino-Acetyl-Neuraminic Acid; Vulgaxanthin-II	3	8.163	8.1406	8.5727	11.359	11.5723	10.7805	11.959	14.8396	10.6733	2.31238	0.873997	5.3178	2.7812	7.5553	5.8115	7.2691	1.8499	5.09747	2.33354	0.952665	14.6914	14.3806	13.9776	16.2903	17.7619	21.1912	16.3822	2.74539	1.1208	6.3109	7.9897	7.1185	6.4031	7.2349	0	8.1321	6.16989	2.80885	1.06165	4.3364	4.6805
	470	1.2775	162.024				Unidentified	4	3.5527	3.7292	4.3475	5.0389	4.6168	0	0	0	2.66064	2.25207	0.851203	1.6233	2.7721	3.283	0	0	0	1.27973	1.50143	0.612955	5.8747	6.935	6.761	9.7791	10.4573	13.4358	8.87382	2.87598	1.17411	2.8937	3.4901	4.2256	3.065	3.2754	0	0	2.4214	1.70735	0.645317	0	2.0716
	471	1.2787	243.046	C6H14O7;C7H10N4O3;C5H12O5;	Na_Na;Na_Na;Na_HCOONa;	2.42753	Dextrose; Acetylamino-amino-methyluracil; Xylitol; Arabinitol; Arabitol; Ribitol	3	6.6976	6.2483	7.0799	8.3059	9.7607	7.7767	9.2299	8.8713	7.99629	1.26075	0.47652	4.1034	4.6366	5.343	0	0	2.21	2.7155	2.34623	0.957846	11.1877	12.835	11.7147	12.6206	11.9266	11.5116	11.966	0.641965	0.262081	6.0871	6.6229	6.1715	5.6161	5.6387	3.6141	4.4407	5.45587	1.061	0.40102	3.7799	3.3931
	472	1.2797	179.05				Unmatched Adduct	4	9.2222	9.5797	8.8885	13.0259	11.9138	12.9783	11.6632	12.7469	11.2523	1.75138	0.661961	6.0827	6.2523	7.4888	6.2214	7.8015	2.5862	6.07215	1.85495	0.757281	15.0982	16.0255	16.0177	18.5575	17.0152	19.5916	17.051	1.71221	0.699005	0	8.6993	8.9332	6.8406	8.722	8.6651	8.2059	7.1523	3.23213	1.22163	5.0812	5.6375
	473	1.2798	308.092	C10H17N3O6S;C18H13NO4;C17H11N5;C13H19NO4S;C16H15N3;	H;H;Na;Na;NaCl;	3.63528	Glutathione; Stealthin C; Letrozole; Probenecid; Epinastine	3	20.2866	20.9197	19.8888	29.2528	29.9187	25.1817	26.0922	26.0873	24.7035	3.94559	1.49129	13.4972	17.0446	17.9127	13.8782	16.1208	11.0923	14.9243	2.55629	1.0436	32.6429	35.3289	32.2601	32.6188	37.9805	32.759	33.9317	2.27592	0.929142	17.5678	21.9496	22.462	14.3657	18.0762	14.5147	17.6233	18.0799	3.19254	1.20667	12.9967	11.5162
	474	1.2807	177.035	C3H8N4O2;	Na_Na;	3.84104	Methylenediurea	3	1.6409	3.0126	3.4858	3.6565	3.6349	2.9536	5.0255	0	2.92623	1.51085	0.571047	0.9294	0.9086	1.9294	0	0	0	0.6279	0.78056	0.318662	4.6549	4.7201	0	0	0	11.9617	3.55612	4.71495	1.92487	0	2.3159	2.3478	1.6365	1.5732	0	0	1.12477	1.09338	0.413259	0	1.095
	475	1.2875	230.138	C13H17N5O2;	[HCOOH];	0.0869036	Cipamfylline	3	12.6062	14.3114	12.6837	16.0499	14.7174	14.3851	23.3544	24.1462	16.5318	4.59515	1.7368	7.1534	5.2966	8.8106	9.2984	10.9536	12.8074	9.05333	2.6663	1.08851	21.969	19.934	21.9037	35.4816	41.616	44.2837	30.8647	10.9169	4.45679	7.035	7.5277	7.6484	6.3497	7.7095	8.0702	5.8925	7.17614	0.79384	0.300043	4.4857	7.8197
	476	1.2883	211.146	C11H24O;	K;	3.45731	Undecanol	3	0	0	0.6208	0.9099	0.3334	0	0	0	0.233012	0.356593	0.134779	0	0	0	0	0	0	0	0	0	1.4906	0.9361	1.9308	0	0	0	0.72625	0.855748	0.349358	0	0	0	0	0	0	0	0	0	0	0	0
	477	1.2893	538.128	C26H30Cl2F3NO;C18H24N5O8P;C25H24FNO6;C17H23N7O8;	K;HCOONa;HCOOK;HCOOK;	1.00348	Halofantrine; Bucladesine; Axitirome; Azotomycin	3	5.5463	4.9443	4.5065	6.9358	8.3774	7.3649	5.3397	0	5.37686	2.54309	0.961198	3.7008	3.8434	4.1683	0	0	0	1.95208	2.14376	0.875187	8.52	11.8895	9.7758	8.8692	0	0	6.50908	5.1763	2.11322	4.6731	0	5.3625	3.373	4.6026	0	0	2.57303	2.47696	0.936203	3.3716	2.8578
	478	1.2903	199.072	C11H12O2;C8H16O3;C6H12N4;C7H14O;	Na;K;NaCl;HCOOK;	2.76281	Trimethylphenylglyoxal; Tetrahydro-naphthoic acid; Cinnamyl acetate; Dihydroxy-dihydro-methylnaphthalene; Ethyl cinnamate; Lachnophyllum ester; Prenylbenzoquinone; Hydroxycaprylic acid; Hydroxyoctanoic acid; Ethyl-hydroxyhexanoate; Hexamine; Heptanone; Ethyl isobutyl ketone; Heptanal	3	0	0	1.2321	0	0	0	0	0	0.154012	0.435613	0.164646	0	0	0	0	0	0	0	0	0	0	1.5995	0	0	0	0	0.266583	0.652993	0.266583	0	0	0	0	0	0	0	0	0	0	0	0
	479	1.2906	212.131				Unidentified	4	0	1.3538	1.3923	0	0	0	2.5703	0	0.66455	0.988845	0.373748	0	0	0	0	0	0	0	0	0	0	0	0	0	0	4.061	0.676833	1.6579	0.676833	0	0	0	0	0.7154	0	0	0.1022	0.270396	0.1022	0	0
	480	1.2908	275.565				Unidentified	4	0	0.7844	1.0401	1.8486	1.5916	0	0	0	0.658087	0.773025	0.292176	0.6399	0	0	0	0	0	0.10665	0.261238	0.10665	2.207	4.0403	1.9493	0	0	0	1.3661	1.66116	0.678166	1.6331	2.0939	0	0.6488	1.6534	0	0	0.861314	0.914063	0.345483	0.8806	0.5781
	481	1.2914	248.15	C12H17N5O;	H;	0.483577	6-O-Cyclohexylmethyl Guanine	3	6.7383	6.4142	7.5866	9.2878	7.5166	8.7661	8.7413	9.5174	8.07104	1.16914	0.441893	4.2025	5.0227	4.2038	5.0471	5.6199	3.4845	4.59675	0.771755	0.315068	12.4584	11.8999	10.7128	14.7305	15.8231	15.7072	13.5553	2.15305	0.878977	4.0844	4.3429	4.6536	3.1302	4.5442	0	0	2.96504	2.08593	0.788408	2.2332	4.1055
	482	1.2919	140.015				Unidentified	4	0.8649	0.9767	0.8454	0	0	0	0	0	0.335875	0.465096	0.17579	0	0	0	0	0	0	0	0	0	1.7468	1.8206	1.5963	1.7763	0	0	1.15667	0.899115	0.367062	0	1.3087	0	0.6888	1.1973	0	0	0.4564	0.600356	0.226913	0	0.4818
	483	1.292	76.0309				Unidentified	4	3.0839	2.7684	2.8668	3.8313	4.7577	3.9222	3.6962	0	3.11581	1.41859	0.536178	1.7429	1.6456	1.9175	0	0	0	0.884333	0.972649	0.397082	4.5421	5.0148	4.3704	0	0	0	2.32122	2.55151	1.04165	0	2.7189	2.8172	1.5745	2.3626	0	0	1.35331	1.32726	0.501658	1.7613	0
	484	1.2929	290.06	C11H14BNO5;C13H8N2O3S;C12H12FNO;	K;NH3;HCOOK;	1.51693	Acetamido-(Carboxyphenyl)Ethyl Boronic Acid; Nitroscanate; Cinflumide	3	1.2433	2.5548	1.723	2.5871	3.6	4.1037	0	0	1.97649	1.52517	0.576459	0	0	0	0	0	0	0	0	0	3.2243	4.2872	0	2.8612	0	0	1.72878	1.95092	0.796461	1.8	2.1812	1.4049	1.1895	0	0	0	0.939371	0.931787	0.352182	0	0.9635
	485	1.2929	467.097	C17H19N6O8P;C20H26Cl2N2O5;C19H28N2O5S2;C22H19F3N4O2;C23H24O8;C20H24O9;C20H25ClN2O5;C19H23ClO7;C18H24ClN2O4P;C18H26N2O5;	H;Na;K;K;K;NaCl;NaCl;HCOONa;HCOONa;NaClx2;	2.8473	N-Adenylylanthranilate; Eclanamine maleate; Darbufelone mesylate; SB 243213; beta-Peltatin A methyl ether; Wortmannin; Ginkgolide A; Nodakenin; Amlodipine; Acroptilin; Clomacran phosphate; 1-[4-Carboxy-2-(3-Pentylamino)Phenyl]-5,5'-Di(Hydroxymethyl)Pyrrolidin-2-One; Disofenin	3	0	0	0	0	0	0	0	0	0	0	0	0	0	0	0	0	0	0	0	0	2.7787	2.5581	0	1.9677	0	0	1.21742	1.35973	0.555106	0	0	0	0	0	0	0	0	0	0	0	0
	486	1.2944	258.134	C13H12N4O;C10H21N3O;	NH3;NaCl;	0.193698	Imazodan; Oxifungin; Diethylcarbamazine	3	20.056	19.7174	19.3286	24.1279	24.1928	25.9442	32.677	34.3626	25.0508	5.77422	2.18245	10.5384	13.9994	11.8831	13.3083	18.6612	15.5169	13.9845	2.86247	1.1686	34.1695	32.143	33.0326	47.6979	62.862	60.4935	45.0664	14.0867	5.75086	10.8706	10.5259	12.0339	9.6172	13.362	12.7658	8.1182	11.0419	1.8354	0.693716	6.3398	10.5134
	487	1.2948	306.077	C16H17N3O;C12H16O6S;C14H19N3S;C10H21N3O3;	K;NH3;Na_Na;KCl;	4.83503	Ergine; Protiofate; Methapyrilene; Aminobutyryl-lysine	3	0	0	0	2.3551	0	0	0	0	0.294388	0.832654	0.314713	0	0	0	0	0	0	0	0	0	2.151	3.207	2.8864	0	0	0	1.37407	1.54367	0.630201	0	0	0	0	0	0	0	0	0	0	0.895	0
	488	1.2949	276.146	C13H17N5O2;	H;	0.724255	Cipamfylline	3	94.5825	89.1647	85.307	131.035	145.303	115.087	133.549	140.439	116.808	24.2205	9.15447	55.9742	68.7919	70.3496	50.7105	68.0486	53.6407	61.2526	8.74895	3.57174	178.933	224.275	151.193	187.553	202.032	177.897	186.98	24.6811	10.076	67.3728	64.1389	64.7963	51.9561	71.5104	51.8411	38.4844	58.5857	11.5987	4.38388	35.5224	58.0033
	489	1.2957	144.102				Unidentified	4	1.204	0	1.4584	1.9619	1.7347	2.1484	0	0	1.06343	0.926084	0.350027	0	0	1.5119	0	0	0	0.251983	0.617231	0.251983	3.2519	3.3718	2.7667	2.6371	0	3.3539	2.56357	1.29385	0.528211	0	1.36	0	0.7516	1.0128	0	0	0.446343	0.583911	0.220698	0	1.1116
	490	1.2959	307.08				Multiply Charged ion - not identified	4	3.3214	3.4132	3.8886	6.4775	8.4078	7.0862	0	0.4932	4.13599	3.02509	1.14338	2.8998	4.2549	5.2231	0	0	0	2.06297	2.37734	0.970546	8.1313	14.6054	8.094	0	0	0	5.13845	6.10781	2.4935	6.6511	6.5264	5.7469	3.7972	7.6348	0	0	4.33663	3.18649	1.20438	4.4877	2.5636
	491	1.2985	116.018				Unidentified	4	0.973	1.6296	1.5187	2.1656	0	2.0952	0	0	1.04776	0.94158	0.355884	0	0	0	0	0	0	0	0	0	2.1184	0	0	0	0	0	0.353067	0.864833	0.353067	1.1155	0	1.012	0	0.9396	0	0	0.438157	0.548856	0.207448	0.71	0
	492	1.2991	211.024	C4H6N4O;	HCOOK;	0	Diamino-hydroxypyrimidine; Amino-imidazolecarboxyamide	3	0.8108	1.488	1.3529	0	0.7834	0	2.4939	0	0.866125	0.889121	0.336056	0.546	0	0	0	0	0	0.091	0.222904	0.091	2.0598	2.5649	0	0	0	0	0.770783	1.20473	0.491828	0.871	0	0	0	1.3113	0	0	0.311757	0.547388	0.206893	0	0
	493	1.2992	142.045				Unidentified	4	0.919	2.0491	1.4198	2.4496	1.6195	0	0	0	1.05713	0.981429	0.370945	0.777	0	1.5571	0	0	0	0.389017	0.651197	0.26585	3.0741	0	2.3523	0	0	0	0.9044	1.41956	0.579533	0	1.3319	1.2271	0.9335	1.22	0	0	0.673214	0.641227	0.242361	0.7968	0.6754
	494	1.2993	421.087	C18H16N2O10;C15H22O10;C12H20N2O9;C18H18O6;C14H20N6O2;	H;NaCl;HCOOK;Na_HCOONa;NaClx2;	3.98967	Musca-aurin-II; Antirrhinoside; Catalpol; 3-Epihydroxymugineic acid; 2,3-Dihydro-2-(4-hydroxyphenyl)-5,6,7-trimethoxy-4H-1-benzopyran-4- one; 2,3-Dihydro-6-hydroxy-2-(4-methoxyphenyl)-5,7-dimethoxy-4H-1- benzopyran-4-one; 3',6'-Dihydroxy-2',4,4'-trimethoxy-chalcone; Samaderin A; Discadenine	3	0	0	2.1664	2.5738	1.6914	2.1963	0	0	1.07849	1.177	0.444862	0	0	0	0	0	0	0	0	0	3.217	3.1374	3.4241	0	0	0	1.62975	1.78775	0.729847	1.5242	0	0	0	1.3683	0	0	0.413214	0.707131	0.267271	0	0
	495	1.2996	381.091	C19H18O7;C16H22O8;C10H14N5O8P;C14H12N6O3;C18H16O5;C11H16N6O4;C15H20O6;C16H18O5;C11H18N4O3;	Na;K;NH3;HCOONa;HCOONa;HCOOK;HCOOK;Na_HCOONa;NaCl_HCOONa;	2.54531	Gardenin B; GMP; Pteroic acid; Baicalein 5,6,7-trimethyl ether; Galangin 3,5,7-trimethyl ether; 2-Methylaminoadenosine; Trimethylolpropane triacrylate; Vomitoxin; 5-O-Methylvisamminol; Homoanserine	3	1.3514	1.5166	0	0	3.0013	0	0	0	0.733662	1.12301	0.424458	0	0	0	0	0	0	0	0	0	0	3.1021	1.9476	0	0	0	0.841617	1.35398	0.552758	1.5786	0	0	1.4058	1.5964	0	0	0.6544	0.81844	0.309341	0	0
	496	1.3004	298.557				Unidentified	4	1.8379	3.1928	2.2955	4.6401	2.7863	0	0	0	1.84408	1.72917	0.653566	1.1883	1.304	0	0	0	0	0.415383	0.644548	0.263136	4.5709	7.009	3.8867	0	0	0	2.57777	3.00853	1.22823	3.7064	3.1409	0	2.3486	3.7314	0	0	1.84676	1.78738	0.675566	2.7874	1.638
	497	1.3012	230.184	C14H25N;C11H20N2O2;	Na;NH3;	3.04101	Azabisabolene; Somantadine; Brivaracetam	Azabisabolene; Somantadine; Brivaracetam	0	0	0	0	0	0	0	0	0	0	0	1.6916	1.902	0.6164	0	0	0	0.701667	0.883747	0.360788	0	0	0	0	0	0	0	0	0	0	0	0	0	0	0	0	0	0	0	2.3299	0
	498	1.3015	229.158				Unidentified	4	0	0	0	0	0	0	0	0	0	0	0	0	0	0	0	0	0	0	0	0	0	0	0	0	0	0	0	0	0	0	0	0	0	0	0	0	0	0	0	0	0
	499	1.3052	89.6279				Unidentified	4	0	0.7322	0.5819	1.124	0.4726	1.1137	0	0	0.50305	0.474689	0.179415	0.0914	0	0	0	0	0	0.0152333	0.0373139	0.0152333	2.2	1.2964	0.9908	0	0	0	0.747867	0.91066	0.371775	0.1089	0	0.0846	0.1622	0.114	0	0.111	0.0829571	0.061195	0.0231296	0.0839	0
	500	1.3069	294.157				Unidentified	4	5.2618	5.8183	5.3875	6.8756	9.5126	8.2056	6.2277	5.0625	6.54395	1.58053	0.597384	4.1607	4.8642	5.1607	2.8812	0	0	2.84447	2.33923	0.954988	10.1685	17.2853	9.7685	9.1155	10.0947	5.5196	10.3254	3.83113	1.56405	5.3732	5.0884	4.5041	3.8895	6.1553	2.4301	1.7182	4.16554	1.60527	0.606734	2.9055	3.8276
	501	1.3113	265.033	C7H14O8;C8H10N4O4;C9H8O5;C6H12O6;C7H8N4O2;C7H11ClN2O;C7H10N2O;	K;K;HCOONa;HCOOK;HCOOK;Na_HCOONa;NaCl_HCOONa;	3.65992	Gluceptate; Acetylamino-formylamino-methyluracil; Nifursemizone; Propenoic acid-4,6-hydroxy cyclohexa-2,5-dienone; Dihydroxyphenylpyruvate; trihydroxy-cinnamate; Deoxy-gluconate; Deoxyarabinohexonic acid; Aldohexose; Inositol; Allose; Galactose; Glucose; Mannose; Sorbopyranose; Fructose; Hamamelopyranose; Keto-Deoxygalactonate; Altrose; Fuconate; Gulose; Hamamelose; Hexose; Idose; Psicose; Sorbos…	3	1.1418	0	1.2378	1.3916	0	0	0	0	0.4714	0.654071	0.247216	0.7826	0	0	0	0	0	0.130433	0.319495	0.130433	2.0589	1.9732	2.7703	0	0	0	1.13373	1.2724	0.519456	1.1694	0	0	0.757	1.1403	0	0	0.4381	0.562333	0.212542	0.5452	0.6958
	502	1.3249	291.066	C14H12N4S;C16H12N2;C13H16N2O;C7H12N4O3;	Na;NaCl;KCl;Na_HCOONa;	0.687129	Phenylsulfanyl-Quinazolinediamine; Cryptolepine; Girgensonine; Tetrahydroharmine; Trimethylallantoin	3	0	2.3127	2.0286	2.6774	1.7963	0	2.9576	0	1.47158	1.26954	0.47984	0	0	0	0	0	0	0	0	0	3.165	1.8232	3.3108	0	0	0	1.38317	1.60149	0.653804	1.4362	0	0	1.2976	1.1295	0	0	0.5519	0.694028	0.262318	1.6355	1.1401
	503	1.3322	89.8435				Unidentified	4	0.2162	0.6151	0.3573	0.8669	0.7031	0.6496	0	0	0.426025	0.331365	0.125244	0.1371	0	0	0	0	0	0.02285	0.0559708	0.02285	1.3043	0	1.0074	0	0	0	0.385283	0.604217	0.246671	0.1633	0	0	0	0	0	0	0.0233286	0.0617216	0.0233286	0	0.1445
	504	1.3553	470.106	C14H21N7O8S;C14H26N3O9P;C25H21N3O2;C22H22FN3O3;C21H23NO4S;C18H21N3O4;	Na;NaCl;KCl;KCl;HCOOK;NaCl_HCOONa;	2.8717	(Threonyl)-Sulfamoyl)Adenosine; (Ribitylamino-Dihydroxypyrimidinyl)-Pentyl-Phosphonic Acid; Benzyl-dimethoxy-phenyl-pyrazoloisoquinoline; Oxidized Renilla luciferin; Ketanserin; Ecadotril; Acrinol	3	0	0	0	0	0	1.392	0	0	0.174	0.492146	0.186014	0	0	0	0	0	0	0	0	0	0	0	0	0	0	0	0	0	0	0	0	0	0	0	0	0	0	0	0	0	0
	505	1.3669	218.14	C11H15N5;C11H12N4;C8H21N3;	H;NH3;NaCl;	0.0916842	Zindotrine; Heteropyrithiamine; Aminopropylcadaverine; Homospermidine	3	7.707	9.3347	6.7004	10.583	12.4486	11.2931	10.4885	13.9092	10.3081	2.37116	0.896213	11.1823	12.7272	10.1358	15.8523	0	9.5346	9.90537	5.35287	2.1853	10.8169	11.7391	7.7796	9.6421	13.9353	13.8024	11.2859	2.3989	0.979348	21.1266	21.2506	18.6895	20.6648	14.2352	19.752	17.8869	19.0865	2.48029	0.937461	15.6404	11.6895
	506	1.3839	385.13	C21H20O7;C14H20N6O5S;C17H19FN4O4;C22H22N2O2;C21H18ClNO3;C19H22N2O3;C16H26N2O4;C16H28O3;	H;H;Na;K;NH3;NaCl;KCl;NaClx2;	2.96004	Demethyldeoxypodophyllotoxin; Anthocyanin-glucoside; Adenosyl-homocysteine; [(Amino-Hydroxy-Propyl)-(Fluoro-Indolylmethyl)-Hydroxy-Imidazolyl]-Acetic Acid; Cintazone; MK-129; Bumadizone; Caribine; Cetamolol; Oxo-pentyl-cyclopentanehexanoic acid	3	0	0	0	11.9443	8.087	0	12.1121	0	4.01792	5.67726	2.1458	17.0643	0	0	0	5.4071	3.6998	4.36187	6.63265	2.70777	7.0888	7.5494	5.3727	2.9239	0	0	3.82247	3.37616	1.37831	22.518	26.6744	26.6132	24.5467	19.8273	9.0123	25.9159	22.1583	6.30404	2.3827	22.999	21.2562
	507	1.3846	136.062	C5H5N5;	H;	4.63023	Adenine	3	0	15.3402	0	16.401	0	17.1109	18.3215	7.7481	9.36521	8.37641	3.16599	24.2868	0	13.4745	0	0	0	6.29355	10.3321	4.21805	10.0426	8.4565	0	0	0	0	3.08318	4.80271	1.9607	30.8492	0	29.0066	36.2633	26.357	0	37.158	22.8049	16.0367	6.06131	29.0316	30.4618
	508	1.3907	250.077	C10H17N3S;C6H13N3O2;	K;Na_HCOONa;	0.67979	Pramipexole; Guanidinovaleric acid	3	0	2.9908	2.2721	0	0	2.4471	2.6007	0	1.28884	1.39235	0.526258	3.2402	0	2.5778	0	0	0	0.969667	1.51674	0.619205	1.572	1.3762	2.0987	0	0	0	0.84115	0.951257	0.388349	3.7308	3.4026	4.3021	4.8203	4.119	0	5.8699	3.74924	1.83775	0.694606	4.0645	4.1369
	509	1.3934	284.083				Unidentified	4	0	2.5495	3.3503	3.6123	1.0363	0	1.8218	0	1.54628	1.51367	0.572112	4.7921	0	3.8171	0	0	0	1.43487	2.24417	0.916177	2.0598	2.039	0	0	0	0	0.683133	1.05833	0.43206	6.7337	6.5747	6.2056	7.3782	6.2103	1.3913	0	4.92769	2.94521	1.11319	6.0348	6.4455
	510	1.3973	170.063				Unidentified	4	0	1.1505	0.8454	0	0	0	0	0	0.249488	0.469102	0.177304	2.3378	0	0	0	0	0	0.389633	0.954403	0.389633	0.6879	1.1729	0	0	0	0	0.310133	0.504342	0.205897	3.7294	2.6174	2.3681	2.9178	3.2074	0	0	2.12001	1.51145	0.571274	2.9483	2.2005
	511	1.4008	88.023				Unidentified	4	0	1.645	1.1402	0	0	0	0	0	0.34815	0.658615	0.248933	0	0	0	0	0	0	0	0	0	0	0	1.679	0	0	0	0.279833	0.685449	0.279833	2.8836	2.0395	0	2.7387	0	0	0	1.09454	1.38979	0.525289	2.7645	2.009
	512	1.4013	236.079	C9H15N3O2;	K;	2.88039	Hercynine; Trimethyl-histidine	3	0	1.3074	1.2153	0.9634	0	1.2992	1.1559	0	0.74265	0.624063	0.235874	1.8739	0	1.2868	0	0	0	0.526783	0.836941	0.34168	1.0841	0	0	0	0	0	0.180683	0.442582	0.180683	2.0686	2.0067	0	3.0417	1.7674	0	0	1.2692	1.25203	0.473224	2.196	2.0715
	513	1.4032	134.028				Unidentified	4	0	2.0318	1.7437	1.8608	0.8482	2.0417	2.0228	0	1.31863	0.902441	0.341091	2.1843	0	1.6026	0	0	0	0.63115	0.994926	0.406177	1.0872	1.0495	1.644	0	0	0	0.630117	0.721652	0.294613	2.4847	3.5771	0	3.5474	2.8673	0	0	1.78236	1.70964	0.646184	3.2181	2.7594
	514	1.4042	159.065	C7H10O4;C5H12N2;	H;NaCl;	2.76616	Hydroxy-oxocyclohexane-carboxylate; Isopropylmaleate; Hydroxymethyl-dihydroxycyclohexenone; Dimethyl citraconate; Succinylacetone; Pyrrolidin-Ylmethylamine	3	0.7027	0.5753	0.8454	1.3381	1.3696	1.2807	2.0228	0	1.01683	0.617162	0.233265	1.1883	1.4684	2.0162	0	1.974	0	1.10782	0.912847	0.372668	0.893	1.2891	0	0	0	0	0.363683	0.577171	0.235629	2.1774	3.1152	1.9628	1.8291	2.2806	0	2.2655	1.94723	0.951794	0.359744	1.7194	1.108
	515	1.4642	198.089	C7H16ClNO3;C8H17NO2;C7H15N;	H;K;HCOOK;	0.403859	Levocarnitine chloride; Amino-octanoic acid; Pregabalin; Aminomethylcyclohexane	3	0	0	0	2.9564	0	1.8151	3.3232	4.5771	1.58397	1.84996	0.699221	0	0	0	0	3.4221	3.2558	1.11298	1.72503	0.70424	2.5513	3.4652	4.4874	3.9584	3.5307	4.7558	3.79147	0.794304	0.324273	2.585	0	3.0674	0	2.9649	3.942	3.3303	2.26994	1.60435	0.606386	0	0
	516	1.5966	380.113	C13H21N3O8S;C16H23NO7;C18H17N5O2;C14H25NO6S;C14H19N5O4;C18H17NO4;C17H15N5;C16H20ClN3;C16H19N3;	H;K;Na_Na;Na_Na;NaCl;HCOONa;Na_HCOONa;Na_HCOONa;NaCl_HCOONa;	4.76177	Lactoylglutathione; Phendimetrazine tartrate; Panadiplon; Isoetharine mesylate; Famciclovir; Methoxy-Dimethyl-(Phenoxymethyl)Indole-Dione; Acronidine; Actinodaphnine; Cularicine; IC261; Naphthyridine Inhibitor; Chloropyramine; Fenapanil	3	2.469	3.4538	2.9307	2.4407	0	0	2.8394	0	1.7667	1.49586	0.56538	2.3169	0.447	2.1166	0	0	0	0.813417	1.10254	0.450109	6.9578	6.3096	4.5712	0	0	0	2.9731	3.34909	1.36726	1.8055	1.639	0	1.3499	1.8651	0	0	0.951357	0.904748	0.341963	0	0
	517	1.6512	319.061	C13H13Cl2NO3;C14H16N2O2;C14H18O;	NH3;KCl;NaClx2;	0.846234	Dichlorophenylcarbamoyl-dimethylcyclopropane-carboxylic acid; Cyclo(L-Phe-L-Pro); Etomidate; Imiloxan; Rolicyprine; Amylcinnamaldehyde	3	0	0	0	1.3126	0	0	3.1171	0	0.553713	1.13304	0.428249	0	0	0	0	3.3422	0	0.557033	1.36445	0.557033	0	0	0	0	0	0	0	0	0	2.6547	4.8285	4.4333	6.2144	3.1696	9.0569	9.748	5.72934	2.7675	1.04602	1.9242	0
	518	1.6513	337.072	C19H12O6;C17H15ClN2O2;C15H14N4O2S;C13H15Cl2NO4;C9H16N4O7;C16H19ClO2;C14H18N2O3;C14H12N4S;C14H20O2;	H;Na;Na;NH3;Na_Na;NaCl;KCl;HCOONa;NaClx2;	1.36469	Bishydroxy[2h-Benzopyranone-Benzopyrone]; Dicumarol; Tetracenomycin D1; Acetyl-(Chlorophenyl)-Dihydro-1h-Pyrazolyl]Phenol; Sulfaphenazole; Cetophenicol; canavaninosuccinate; Clidanac; Letimide; phenylalanyl-proline; Methohexital; Physovenine; Phenylsulfanyl-Quinazolinediamine; Glutinosone; Oblongolide	3	0	0	0	1.9671	0	1.6969	3.759	3.4806	1.36295	1.60946	0.608319	0	0	4.2367	0	0	0	0.706117	1.72963	0.706117	0	0	0	0	0	0	0	0	0	3.6875	5.6874	8.1169	7.096	5.4955	9.8918	12.818	7.54187	3.06518	1.15853	3.0129	0
	519	1.6819	466.111	C15H21N7O7S;C19H25NO10;C20H21N5O6;C20H25NO2S2;	Na;K;K;Na_HCOONa;	0.150179	5'-O-(N-(L-Prolyl)-Sulfamoyl)Adenosine; Vicianin; Lucumin; Pemetrexed; Tiagabine	3	0	9.5375	8.4408	14.1322	0	12.1278	14.4792	9.8191	8.56707	5.7061	2.1567	15.4604	0	15.905	17.1358	15.2078	0	10.6182	8.25146	3.36864	5.5033	6.1497	0	6.0788	5.7449	0	3.91278	3.03979	1.24099	34.2225	42.1561	27.1299	41.5348	47.0604	30.6819	79.1211	43.1295	17.3426	6.5549	28.8994	0
	520	1.7819	452.134	C19H27NO8S;C24H18O8;C26H21N3O2;C21H24F3N3S;C22H23N3O4;C17H22BN2O6;C19H29NO4;C19H23N3O2;	Na;NH3;Na_Na;Na_Na;NaCl;Na_HCOONa;NaClx2;NaCl_HCOONa;	0.840459	N-Methylscopolamine methylsulfate; Knipholone; Renilla luciferin; Trifluoperazine; Erlotinib; D-Naphthyl-1-Acetamido Boronic Acid Alanine; Ankorine; Ergometrine; Ergonovine; MEGA	3	0	0	0	0	0	0	0	0	0	0	0	0	0	0	0	0	0	0	0	0	2.3356	1.9486	0	0	0	0	0.714033	1.11292	0.45435	0	0	0	0	0	0	0	0	0	0	0	0
	521	1.7845	470.144				Unidentified	4	1.243	2.2348	0	3.2843	0	0	0	0	0.845263	1.28787	0.486769	0	1.4898	1.0967	0	0	0	0.431083	0.679302	0.277324	4.8943	4.1487	4.7654	2.3878	0	0	2.69937	2.27407	0.928386	2.1548	0	1.2764	0	1.441	0	0	0.696029	0.908997	0.343568	0	1.4934
	522	1.785	346.083				Multiply Charged ion - not identified	4	1.1618	2.7551	2.4388	4.1309	0	3.9356	0	0	1.80278	1.75016	0.661498	0	0	0	0	0	0	0	0	0	5.5614	5.7809	4.9645	0.9703	0	0	2.87952	2.835	1.15738	0	0	0	1.2415	2.031	0	0	0.4675	0.8303	0.313824	0	1.0711
	523	1.7854	130.051				Unidentified	4	0	1.7565	0	1.8504	0	0	0	0	0.450862	0.835212	0.315681	0	0	0	0	0	0	0	0	0	0	2.3504	0	0	0	0	0.391733	0.959547	0.391733	0	0	0	0.7367	0	0	0	0.105243	0.278446	0.105243	0	0
	524	1.7856	152.059				Unidentified	4	0	2.7613	0	3.4309	0	2.6147	4.3436	0	1.64381	1.83157	0.692267	1.2478	0	2.784	0	0	0	0.671967	1.14878	0.468986	3.4697	3.9302	0	5.0862	0	0	2.08102	2.3397	0.955178	0	0	0	0	0	0	0	0	0	0	0	0
	525	1.7934	379.101				Multiply Charged ion - not identified	4	1.8211	4.0471	3.2064	4.848	0	0	0	0	1.74032	2.04414	0.772614	2.1806	1.6099	0	0	0	0	0.63175	0.995203	0.40629	0	8.0362	8.527	0	0	0	2.76053	4.27942	1.74706	3.3274	0	1.7869	1.6538	2.9447	0	0	1.38754	1.4256	0.538826	1.5097	0
	526	1.8553	137.047	C5H10N2;	K;	1.09451	(3s)-2,3,4,5-Tetrahydropyridin-3-Amine;	3	0	2.3546	1.754	0	0	0	0	0	0.513575	0.964408	0.364512	2.6918	2.9912	2.7544	0	2.0322	0	1.74493	1.38859	0.566888	2.1683	2.7794	2.7558	0	0	0	1.28392	1.4234	0.581102	2.8137	3.6218	2.987	4.5877	6.2501	0	0	2.89433	2.28864	0.865025	1.0948	0
	527	2.0738	775.213	C37H40N4O10;	KCl;	0.477288	Pentacarboxyl porphyrinogen III	3	0	0	0	0	0	0	16.4129	0	2.05161	5.80284	2.19327	0	0	0	0	0	10.104	1.684	4.12494	1.684	0	0	5.3919	19.558	25.4422	28.6549	13.1745	12.9506	5.28707	0	0	0	0	0	0	0	0	0	0	0	0
	528	2.1156	394.077	C15H14FN3O3;C17H17NO2;	Na_HCOONa;NaCl_HCOONa;	1.39566	Flumazenil; (-)-Caaverine; 3-Oxo-N-phenyl-N-(phenylmethyl)butanamide; 6-Azaequilenin; Apomorphine; Assoanine; cinnamoyltyramine; Memotine	3	0	0	0	0	0	0	0	0	0	0	0	0	0	0	0	0	0	0	0	0	0	0	0	0	3.8034	0	0.6339	1.55273	0.6339	0	0	0	0	0	0.5612	0	0.0801714	0.212114	0.0801714	0	0
	529	2.1186	370.081	C18H18ClNO4;C11H22NO7P;C18H17NO4;C19H21NS;C15H17NO2;	Na;NaCl;NaCl;KCl;NaCl_HCOONa;	3.02637	Clanobutin; PC(3:1); 5-Methoxy-1,2-Dimethyl-3-(Phenoxymethyl)Indole-4,7-Dione; Acronidine; Actinodaphnine; Cularicine; IC261; Dosulepin; Pizotyline; Agomelatine; Lemobiline	3	0	0	0	0	0	0	4.8262	0	0.603275	1.70632	0.644928	0	0	0	0	0	2.1965	0.366083	0.896717	0.366083	0	0	0	0	9.9373	13.8133	3.95843	6.25367	2.55305	0	0	0	0	0	0	0	0	0	0	0	0
	530	2.1479	466.116				Multiply Charged ion - not identified	4	0	0	0	0	0.4374	0	15.4959	0	1.99166	5.45868	2.06319	0	0	0	0	20.2193	26.2196	7.73982	12.1397	4.956	0	0	0	0	0	0	0	0	0	0	0	0	0	3.056	60.6525	0	9.10121	22.7605	8.60266	0.4003	0
	531	2.1775	120.081	C8H9N			Indoline	1	143.333	104.34	133.363	130.782	148.397	295.792	287.436	163.103	175.818	73.4468	27.7603	125.059	146.124	126.349	121.181	142.136	150.918	135.294	12.5868	5.13853	179.064	143.384	274.524	169.899	251.594	224.72	207.198	51.1192	20.8693	58.8358	80.9147	70.48	64.3817	65.7017	96.2107	48.6147	69.3056	15.465	5.84522	61.5765	74.5376
	532	2.1868	421.09	C18H16N2O10;C21H18O8;C15H22O10;C14H23N2O7P;C20H16O6;C18H18O6;C14H20N6O2;C18H18N2O2;	H;Na;NaCl;NaCl;HCOONa;Na_HCOONa;NaClx2;NaCl_HCOONa;	2.58853	Musca-aurin-II; Auramycinone; Dihydro-NAME; Antirrhinoside; Catalpol; N-[O-Phosphono-Pyridoxyl]-Isoleucine; Vitamin B6 Complexed with 2-Amino-Hexanoic Acid; Savinin; 2,3-Dihydro-2-(4-hydroxyphenyl)-5,6,7-trimethoxy-4H-1-benzopyran-4- one; 2,3-Dihydro-6-hydroxy-2-(4-methoxyphenyl)-5,7-dimethoxy-4H-1- benzopyran-4-one; 3',6'-Dihydroxy-2',4,4'-trimethoxy-chalcone; Samaderin A; Discadenine; 2-[3-Ethy…	3	0	0	0	0	0	0	0	0	0	0	0	0	0	0	0	0	0	0	0	0	0	0	0	4.067	0	12.1996	2.7111	4.92484	2.01056	0	0	0	0	0	0	0	0	0	0	0	0
	533	2.1918	303.158	C16H21N3O3;C16H18N2O3;C17H25NO;	H;NH3;Na_Na;	2.20275	Indolylacetyl-lysine; Cromakalim; Levcromakalim; Pilosine; Eperisone	3	3.1031	0	0	0	0	4.5661	0	0	0.95865	1.81763	0.686999	0	0	0	0	0	0	0	0	0	0	0	9.7709	0	0	0	1.62848	3.98895	1.62848	0	0	0	0	0	0	0	0	0	0	0	0
	534	2.2018	340.065	C14H10O9;C14H15F2N3S;C16H13N3O3;C13H19N3OS;C11H13NO7;C9H13N5O4;C9H15N3O3;	NH3;Na_Na;Na_Na;KCl;HCOONa;HCOOK;NaCl_HCOONa;	3.8228	Digallate; Rocastine; Nitrophenyl-Ara; Amino-hydroxy-(erythro-trihydroxypropyl)-dihydropteridine; Dihydroneopterin; Ganciclovir; Theophylline glycinate; Methyl-diazoacetamidohexanoate	3	2.9362	0	0	0	3.3375	4.9576	0	0	1.40391	2.02026	0.763587	0	0	0	0	0	0	0	0	0	0	4.2956	7.4147	12.292	13.6929	17.8457	9.25682	6.57808	2.68549	0	0	0	0	0	0	0	0	0	0	0	0
	535	2.203	149.06	C9H8O2;	H;	4.629	coumaraldehyde; Dihydrocoumarin; trans-Cinnamate; Hydroxy-indanone; Isochromanone; Hydroxycinnamyl aldehyde	3	0	0	0.7926	1.5461	0	3.6603	0	0	0.749875	1.30482	0.493177	0.8996	0	0	0	0	0	0.149933	0.36726	0.149933	1.9942	1.7756	3.3579	0	0	0	1.18795	1.4098	0.57555	1.0343	1.074	0	0	1.0263	0	0	0.4478	0.558699	0.211169	0.8374	0
	536	2.2033	438.199	C21H27N7O;C21H27N3O3;	Na_Na;HCOONa;	1.4377	oxidized cypridina luciferin; Oxidized Cypridina luciferin; Anidoxime; Pirodavir	3	0	0	0	0	0	4.0433	0	0	0.505413	1.42952	0.540309	0.5932	3.3095	0	0	0	0	0.65045	1.3241	0.54056	0	0	0	0	0	0	0	0	0	0	0	0	0	0	0	0	0	0	0	0	0
	537	2.2151	166.087	C9H11NO2;C9H8O2;	H;NH3;	4.51571	Phenylalanine; Pyridyl-butanoate; Aminohydrocinnamic Acid; Tyrosinal; Hydroxy-indanone; Isochromanone; Hydroxycinnamyl aldehyde; coumaraldehyde; Dihydrocoumarin; trans-Cinnamate	3	16.7214	15.1592	14.7607	18.6028	21.2677	35.0938	21.4813	18.6058	20.2116	6.51147	2.4611	15.8889	17.7356	24.0924	12.2477	13.9787	10.4494	15.7321	4.8385	1.97531	19.0796	22.401	38.8327	22.2901	23.8108	25.5129	25.3212	6.95056	2.83755	10.0492	13.0566	12.5861	9.3704	0	8.2151	8.1046	8.76886	4.33201	1.63735	9.8328	9.5987
	538	2.217	729.502				Unidentified	4	0	0	0	0	0	0	0	5.2462	0.655775	1.85481	0.701053	0	0	0	0	0	1.0359	0.17265	0.422904	0.17265	0	0	0	0	0	0	0	0	0	0	0	0	0	0	6.3557	0	0.907957	2.40223	0.907957	0	0.0482
	539	2.2176	937.268	C31H52N7O17P3S;	NH3;	1.00291	Decenoyl-CoA; Citronellyl-CoA	3	0	0	0	0	0	5.4018	0	0	0.675225	1.90982	0.721846	0	0	0	0.6479	0	0	0.107983	0.264504	0.107983	0	0	5.5799	0	0	0	0.929983	2.27798	0.929983	0	1.047	0.6975	0	0	0	0	0.249214	0.437409	0.165325	0.0419	0.0482
	540	2.2256	649.106	C28H30O13;C28H28Cl3FN2O4;	KCl;HCOONa;	2.68061	Steffimycin; GW 2433	3	8.1473	7.9419	7.6969	0	6.4736	12.4809	22.535	20.2311	10.6883	7.46012	2.81966	0	12.1484	9.7705	9.0602	0	17.2885	8.0446	6.86633	2.80317	0	5.4655	13.5004	19.3891	28.7374	19.5221	14.4357	10.4372	4.26097	5.9153	7.2248	7.8361	0	6.7263	10.2752	0	5.42539	3.94487	1.49102	10.1016	0
	541	2.2284	547.185	C23H32N6O4S;C27H36O7;C26H32ClFO5;C28H34N2O2;	NaCl;KCl;HCOONa;NaClx2;	1.38893	Vardenafil; Methylprednisolone aceponate; Clobetasone butyrate; Carbiphene	3	0	0	0	0	0	0	0	0	0	0	0	0	0	0	0	0	0	0	0	0	0	0	0	0	0	0	0	0	0	0	3.9227	4.0397	0	0	0	0	1.13749	1.94292	0.734355	0	0
	542	2.2294	469.107	C23H24Cl2N2O3;C26H22O6;C20H24O10;C18H23FN4O5;C13H24N2O11;C19H22O8;C20H29ClO3;	Na;K;Na_Na;KCl;HCOOK;Na_HCOONa;NaClx2;	0.767416	Solabegron; Stypandrol; Ginkgolide; Rutarin; Eperezolid; Macrozamin; Hydroxyvernolide; 9-Chloro-11beta,17beta-dihydroxy-17-methylandrost-4-en-3-one	3	11.9296	6.2507	9.0877	0	14.0303	17.8753	17.4469	15.1251	11.4682	6.11035	2.3095	0	0	3.7572	2.8075	0	0	1.09412	1.7214	0.702758	0	18.9604	28.6409	32.7367	34.4572	36.452	25.2079	13.8197	5.64186	0	0	2.4179	0	0	0	0	0.345414	0.91388	0.345414	0	0
	543	2.2318	233.062				Unidentified	4	4.7023	5.0577	4.9936	0	0	5.1982	0	10.5229	3.80934	3.67019	1.3872	0	0	0	6.9856	11.707	13.5295	5.37035	6.25869	2.5551	0	0	0	0	0	10.4045	1.73408	4.24762	1.73408	0	0	0	0	0	8.9068	4.1529	1.86567	3.46921	1.31124	0	0
	544	2.239	147.068	C4H12N2;	NaCl;	1.76791	Putrescine;	3	0	0	0	0	0	0	4.5957	0	0.574462	1.62483	0.614126	0	0	0	14.9747	0	0	2.49578	6.1134	2.49578	0	0	0	24.7439	5.7035	0	5.07457	9.90235	4.04262	0	0	0	0	0	3.1157	0	0.4451	1.17762	0.4451	0	0
	545	2.2451	689.911				Unidentified	4	0	0	0	0	0	2.2273	0	0	0.278413	0.787469	0.297635	0	2.639	0	0	7.2045	7.4452	2.88145	3.5912	1.4661	0.0542	0	0.7183	0	0	0	0.12875	0.289632	0.118242	0	0	0	0	0	8.2538	0	1.17911	3.11964	1.17911	0	0
	546	2.2458	628.167				Multiply Charged ion - not identified	4	4.004	0	0	0	4.7423	10.4033	10.2985	0	3.68101	4.54203	1.71673	0	7.682	8.6575	5.963	7.0017	10.9	6.7007	3.68674	1.50511	0	0	5.389	0	0	0	0.898167	2.20005	0.898167	6.9272	16.7817	13.3776	0	8.4879	19.9532	10.3609	10.8412	6.62534	2.50414	3.685	0
	547	2.2723	617.802				Unidentified	4	0	0	0	0	0	0	0	0	0	0	0	0	0	0	0	0	0	0	0	0	0	0	0	0	0	0	0	0	0	0	0	0	0	0	0	0	0	0	0	0	0
	548	2.2828	350.122				Isotope	4	0	0	0	0	0	0	0	0	0	0	0	0	0	0	0	0	0	0	0	0	0	0	0	0	0	0	0	0	0	0	0	0	0	0	0	0	0	0	0	0	0
	549	2.2892	614.189	C20H35NO16;	HCOONa;	2.08405	galactosyl-galactosyl-acetyl-glucosamine; Galactosyl-galactosyl-acetyl-glucosamine; Galactosyl-acetyllactosamine; Lacto-N-triaose	3	0	0	0	0	0	0	0	0	0	0	0	0	0	0	0	0	0	0	0	0	0	0	0	0	0	0	0	0	0	0	0	0	0	0	0	0	0	0	0	0	0
	550	2.2936	361.176	C22H26O3;C19H30O4;C19H21NO5;C20H17N5O;C17H18FN5O2;C20H28O3;C16H30O5;C17H26N4O;C14H30N4O2;C18H28O2;C19H26O;	Na;K;NH3;NH3;NH3;Na_Na;NaCl;NaCl;KCl;HCOOK;Na_HCOONa;	0.276873	Dimethoxy-norpregna-pentaen-one; Resmethrin; Decylubiquinone; Rapanone; Sinapoyltyramine; Methyl-[(Phenyl-Triazolo-Pyridazinyl)Phenyl]Acetamide; Benzo-Dioxolylmethyl-Butyl-Fluoro-9h-Purinylamine; Dihydroxy-methylandrostadienone; Dihydroxy-methylandrostadienone; Deoxy-PGJ2; Deoxy-PGA2; Hydroxy-methylandrostenedione; Hydroxyestrenone acetate; Hydroky-all-trans-retinoic acid; Hydroxy-retinoic acid; …	3	0	0	0	0	0	0	0	0	0	0	0	0	0	0	0	0	0	0	0	0	0	0	0	0	0	0	0	0	0	0	0	0	0	0	0	0	0	0	0	0	0
	551	2.3132	666.132	C21H29N7O14P2;C28H30ClNO10;	H;Na_HCOONa;	0.825661	NADH; Novclobiocin 105	3	17.201	12.9293	15.0864	16.7634	18.4844	36.7145	33.5821	23.6331	21.7993	8.8309	3.33777	15.2798	19.3437	17.2721	0	17.0533	17.1898	14.3565	7.15031	2.9191	18.278	19.491	42.8006	28.0946	40.6775	23.4954	28.8062	10.6122	4.33243	9.682	0	0	6.0316	9.1609	9.7877	0	4.95174	4.79938	1.81399	21.5526	15.3936
	552	2.3197	242.102	C11H15NO5;C10H13N5O;C11H12O5;C6H15N5;	H;Na;NH3;HCOOK;	2.39569	Methocarbamol; Zeatin; Trihydroxyphenyl-gamma-valerolactone; Sinapate; Buformin	3	54.4992	50.709	40.8828	34.2319	65.8619	72.7118	89.4418	81.6931	61.2539	19.5186	7.37733	22.5182	54.3178	86.5741	68.3645	76.6931	102.518	68.4977	27.8083	11.3527	25.7027	65.3793	76.0123	104.942	132.155	110.974	85.8608	38.1402	15.5707	24.645	41.8242	50.0353	8.8692	24.8566	50.6362	29.6855	32.936	15.3214	5.79096	29.8013	14.553
	553	2.3202	499.118	C16H26N4O10S2;C21H30Cl2N2O5;C18H33ClN2O5S;C20H24O9;	H;K;KCl;Na_HCOONa;	3.38597	Bis-gamma-glutamylcystine; Dexloxiglumide; Loxiglumide; Clindamycin; Ginkgolide A; Nodakenin	3	6.0113	5.4706	5.2201	7.7442	9.1349	11.7809	15.3634	11.2641	8.99869	3.5981	1.35995	0	0	0	0	0	0	0	0	0	14.9914	17.4372	20.2815	0	32.7083	31.6258	19.5074	12.0577	4.92252	0	0	0	0	0	0	0	0	0	0	0	0
	554	2.3228	497.105	C16H26N4O8P2S;C20H25BrN4O6;C22H23ClN6O;C22H20O9;C20H22O9;C19H28N2O4S;C14H26O11;	H;H;KCl;HCOONa;Na_HCOONa;NaClx2;NaCl_HCOONa;	4.38541	Methyl-hydroxybutyl-ThPP; Brodimoprim-Dicarboxylate; Losartan; epsilon-Rhodomycinone; Astringin; Trichocarpin; Sulfanylheptanoyl-Phe-Ala; Amylose; Galactan; Mannan	3	0	0	0	0	0	0	0	0	0	0	0	0	0	0	0	0	0	0	0	0	0	0	0	0	0	0	0	0	0	0	0	0	0	0.2281	0	0	0.0325857	0.0862137	0.0325857	0.0839	0
	555	2.3252	348.073	C14H10ClF3N2O2;C15H14FN3O3;C14H18F3NO;C11H21NO4;C16H15N;	NH3;Na_Na;KCl;NaClx2;NaCl_HCOONa;	3.24645	NS 1608; Flumazenil; Oxaflozane; (Aminoethyl)Nonanedioic Acid; Isobutyryl-carnitine; Butoxycarbonyl-leucine; O-Butanoylcarnitine; Dizocilpine	3	4.6379	5.1999	5.9667	7.3151	7.2307	7.1718	9.2071	8.9116	6.9551	1.62915	0.615762	5.3518	5.4341	4.9426	0	0	7.6431	3.89527	3.16161	1.29072	9.3253	8.227	6.4037	11.0108	13.215	15.0248	10.5344	3.20702	1.30926	3.1801	0	0	4.9233	0	0	0	1.15763	2.04007	0.771072	5.0967	4.5744
	556	2.328	229.101	C16H14;	Na;	1.92057	trans,trans-Diphenyl-butadiene	3	6.7728	7.9933	0	0	7.9205	7.3453	8.1934	10.723	6.11854	3.9474	1.49198	4.0047	5.7195	4.4756	5.6079	0	7.3328	4.52342	2.49928	1.02033	0	12.389	10.4861	17.4868	18.354	22.9096	13.6043	8.00624	3.26853	0	3.2723	1.6644	0	2.8343	0	0	1.11014	1.46541	0.553872	0	0
	557	2.3284	706.202				Isotope	4	0	0	16.2239	0	0	23.3942	0	22.297	7.73939	10.879	4.11189	0	0	28.4585	0	32.2627	16.8845	12.9343	15.0471	6.14296	0	0	10.4418	11.5287	0	16.0923	6.3438	7.20335	2.94076	0	37.6113	0	0	0	0	0	5.37304	14.2157	5.37304	0	0
	558	2.3296	424.147	C21H24ClN3O3;C19H23N5O3S;C24H23N3O2;C23H18O7;C22H22FN3O2;C20H22ClN3O;C18H29NO3;	Na;Na;K;NH3;Na_Na;HCOONa;NaClx2;	3.41868	Fominoben; Ipsapirone; Bifeprunox; Rotenonone; Droperidol; Amodiaquine; Amprotropine; Betaxolol; Butamirate; Levobetaxolol	3	0	0	0	0	0	0	0	0	0	0	0	0	0	0	0	0	0	0	0	0	0	0	0	0	0	0	0	0	0	0	0	0	0	0	0	0	0	0	0	0	0
	559	2.3311	371.148	C19H24O6;C16H28O7;C16H19NO8;C18H22O4;C16H24N2;	Na;K;NH3;HCOONa;NaCl_HCOONa;	3.26017	Bis(dimethoxyphenyl)propanediol; Hydroxy-trioxo-disecoandrostadienoate; Chamissonin diacetate; Eremantholide A; Eurycomalactone; GA1; GA29; GA34; Gibberellin; Onopordopicrin; Radiatin; Tagitinin F; Hydroxytridecane-tricarboxylate; Oxindole-acetyl-hexose; Dihydroxyhexestrol; Ketoestriol; Arnebinone; Enterodiol; Nordihydroguaiaretic acid; Xylometazoline	3	0	0	0	0	0	0	0	0	0	0	0	0	0	0	0	0	0	0	0	0	0	0	0	0	0	0	0	0	0	0	0	0	0	0	0	0.4409	0.0629857	0.166645	0.0629857	0	0
	560	2.3328	360.199	C20H31NO;C17H35NO2;	NaCl;KCl;	2.74842	(Methylpropyl)hexadeca-trienynamide; Trihexyphenidyl; Anteiso(4E,-methyl-d17:1) sphingosine; C17 Sphingosine; iso (4E,-methyl-d17:1) sphingosine	3	0	0	0	0	0	0	0	0	0	0	0	0	0	1.0096	0	0	0	0.168267	0.412167	0.168267	0	0	0	0	0	0	0	0	0	0	0	0	0	0	0	0	0	0	0	0	0
	561	2.3361	306.154	C14H16N4O3;	NH3;	2.09043	Piromidic acid	3	0	0	0	0	0	0	0	0	0	0	0	0	0	0	0	0	0	0	0	0	0	1.2955	0	0	0	0	0.215917	0.528886	0.215917	0	0	0	0	0	0	0	0	0	0	0	0
	562	2.3386	823.737				Unidentified	4	0	0	21.9286	0	0	24.1535	0	20.7616	8.35546	11.5684	4.37243	0	0	0	28.213	29.5718	37.9744	15.9599	17.8001	7.26686	0	0	0	12.1263	15.3693	14.3994	6.9825	7.72105	3.15211	0	38.3386	0	31.9805	0	0	0	10.0456	17.254	6.5214	0	0
	563	2.3391	550.128	C20H29NO13;C24H23N3O6S;C21H27N3O7S;C17H29NO11;	NaCl;HCOONa;HCOOK;NaCl_HCOONa;	0.418085	(Hydroxymaltosephenyl)Glycine; Talampicillin; Bacampicillin; Neolinustatin	3	17.7886	21.1735	21.0395	17.4409	24.4371	23.1013	29.0071	31.5838	23.1965	5.0253	1.89939	0	0	0	0	0	0	0	0	0	45.0393	50.9511	52.5971	75.5751	76.9111	76.8884	62.9937	14.9701	6.11153	3.2578	0	0	0	3.5539	0	0	0.9731	1.66408	0.628964	0	2.4025
	564	2.3401	451.125	C20H26N2O5S;C16H28N2O8;C17H24N6O4;C15H28O7P2;C21H22N2O4;C22H18N6;C19H21FN2O4;C21H25ClO3;C19H24N2O3S;	Na_Na;KCl;KCl;HCOONa;HCOOK;HCOOK;Na_HCOONa;Na_HCOONa;Na_HCOONa;	0.177334	Alacepril; Suloxifen oxalate; (ETHOXYCARBONYL)OXIRAN-2-YL]CARBONYL; Selodenoson; Dehydrodolichol diphosphate; Farnesyl diphosphate; Nerolidyl diphosphate; farnesyl diphosphate; Apodine; TMC278; Nadifloxacin; Delmadinone; Dihydrocodeine thiocyanate; LY395153	3	0	0	0	0	0	0	0	0	0	0	0	0	0	0	0	0	0	0	0	0	0	0	0	0	0	0	0	0	0	0	0	0	0	0	0	0	0	0	0	0	0
	565	2.3404	264.125	C15H20ClN3O2;C15H13N5;	[HCOOH];H;	2.38523	Vibunazole; Zacopride; Pyrimidinylamino-Naphthalene-Carboximidamide	3	8.1283	8.4735	10.1115	11.07	7.9995	9.1787	18.1703	16.4768	11.2011	3.94298	1.4903	4.1556	5.4406	0	5.9743	7.4094	9.9502	5.48835	3.33872	1.36303	17.004	15.4744	14.5946	22.5131	25.6442	40.774	22.6674	9.85614	4.02375	3.6561	0	0	0	3.014	0	0	0.952871	1.63786	0.619053	0	3.4658
	566	2.3443	332.121	C12H21N5O2S2;C14H19N3O5;C15H23N3OS;C12H21N3O5;C13H17N3O3;	H;Na;K;Na_Na;HCOONa;	3.70348	Nizatidine; (Hydroxy-Benzyl)-(Hydroxy-Methyl-Ethyl)-Oxo-Imidazolidinyl-Acetic Acid; Dimazole; Acetyl-ala-ala-ala-methylester; Tetrahydrozoline nitrate	3	0	0	0	2.9372	0	0	0	0	0.36715	1.03846	0.3925	0	0	0	0	0	0	0	0	0	0	0	0	0	0	12.3882	2.0647	5.05746	2.0647	0	0.7166	0	0	0	0	0	0.102371	0.270849	0.102371	0	0
	567	2.3448	292.119	C16H21NS2;C15H14O5;C10H23N3O2;	H;NH3;KCl;	0.479257	Diethylthiambutene; Epiafzelechin; Deoxyleucopelargonidin; Afzelechin; Pyrufuran; Apiforol; Fisetinidol; H37; Luteoliflavan; Methysticin; Phloretin; Ptaerochromenol; Deoxyhypusine	3	31.7752	28.9847	32.4701	36.5923	32.88	29.4391	46.3255	46.6694	35.642	7.09206	2.68055	14.5651	17.3207	13.9296	19.5195	21.9204	24.9624	18.703	4.28991	1.75135	49.1099	46.2735	39.843	64.2477	76.0386	87.683	60.5326	18.7256	7.6447	9.95	9.8201	10.8384	9.5817	10.2593	10.296	7.3384	9.72627	1.12748	0.426146	5.5826	11.7029
	568	2.3475	287.074	C10H16O8;C9H14N4O4;C9H14O6;	Na;Na_Na;HCOONa;	3.58794	Methyl-O-[Carboxyethylidene]-Galactopyranoside; Molsidomine; Triacetin	3	5.2799	3.9043	3.6494	4.7295	3.8192	4.9077	7.5309	11.0305	5.60642	2.51877	0.952005	3.8772	4.4926	5.2771	7.1272	9.1114	16.9318	7.80288	4.86322	1.9854	4.2922	0	0	7.5354	9.9707	12.6803	5.74643	5.23987	2.13917	7.5791	7.5842	7.6554	6.109	6.4785	13.9455	0	7.05024	4.0701	1.53835	2.2023	3.6919
	569	2.3482	556.217	C29H33NO10;C22H44NO8P;C29H35NO2;	H;KCl;NaCl_HCOONa;	3.20018	Desmethyldescarbamoylnovobiocin; PC(14:0); Mifepristone; UK 78282	3	5.2135	4.6495	3.5545	4.8487	6.2649	5.7017	0	0	3.7791	2.46253	0.930749	2.9982	0	0	0	0	0	0.4997	1.22401	0.4997	6.0218	8.2312	9.2793	0	10.9396	10.5754	7.50788	4.08471	1.66758	3.7352	0	4.651	3.4574	3.4467	0	0	2.18433	2.08238	0.787066	3.1548	0
	570	2.3484	216.128				Unidentified	4	3.4168	0	0	0	0	0	0	0	0.4271	1.20802	0.456589	0	0	1.5745	1.7255	0	0	0.55	0.853393	0.348396	0	0	0	0	0	0	0	0	0	0	1.9263	1.285	0	0	0	0	0.458757	0.805052	0.304281	0	0
	571	2.3512	685.186	C34H32N4O9;C31H36O12;	Na_Na;HCOOK;	4.24702	2-Octenedioic acid / (iso)Butyrylcarnitine adduct; Nicomol	3	5.5719	4.8461	5.3584	5.6481	8.0639	6.2276	7.9896	0	5.4632	2.50756	0.947769	2.7947	0	0	0	0	0	0.465783	1.14093	0.465783	7.3055	10.0994	9.637	0	14.186	17.6598	9.81462	6.05625	2.47245	5.3441	5.3128	6.0454	4.1207	5.9634	0	6.3226	4.72986	2.2079	0.834507	2.2071	0
	572	2.3513	162.024				Unmatched Adduct	4	8.032	6.2169	7.5004	9.6243	6.9159	7.4183	13.3958	17.1602	9.53298	3.81362	1.44141	8.6644	7.4349	7.145	11.7423	16.5808	19.2431	11.8017	5.07571	2.07215	6.4803	5.3144	6.8556	11.3143	14.4466	16.6846	10.1826	4.69497	1.91671	5.5973	7.1969	8.3162	8.5774	7.956	15.3105	7.6055	8.6514	3.09521	1.16988	3.585	7.2511
	573	2.3518	475.164	C25H22N4O6;C20H24Cl2N10;C24H32O5;C17H32N6O3S;C24H28O2;C21H29FO3;	H;H;KCl;KCl;NaCl_HCOONa;NaCl_HCOONa;	4.60894	CRA_17312; Picloxydine; 3,7,12-Trioxocholenoic Acid; 7alpha-Hydroxy-3,12-dioxochola-1,4-dien-24-oic Acid; Deprodone propionate; 2-[2-(2-Cyclohexyl-2-Guanidino-Acetylamino)-Acetylamino]-N-(3-Mercapto-Propyl)-Propionamide; 6,9,12,15,18-Tetracosapentaynoic acid; Arotinoid acid; Bexarotene; bixin aldehyde; Bixindial; 21-Fluoro-11beta-hydroxypregnene-dione; 6alpha-Fluoro-17beta-hydroxyandrostenone ace…	3	11.2117	8.8681	7.8242	12.2095	14.4215	13.807	11.5591	0	9.98764	4.61113	1.74284	12.3214	14.522	14.1167	0	12.8267	12.1595	10.9911	5.46892	2.23268	10.524	12.3809	9.545	11.5809	11.6828	13.71	11.5706	1.44532	0.590049	13.8587	13.9196	16.2887	10.1592	15.5874	11.2936	6.4829	12.5129	3.43722	1.29915	8.0639	8.7784
	574	2.3538	641.213	C29H36N6O6S;C34H36N4O4S;C33H34N4O6;C29H42O11;C34H36O7;	Na_Na;Na_Na;NaCl;KCl;HCOOK;	1.94943	Tetragastrin; INHIBITOR Q8467 OF DUPONT MERCK; Azelnidipine; Biliverdin; Biliverdin Ix Gamma Chromophore; Biliverdine Ix Alpha; alpha-Antiarin; Ingenol 3,20-dibenzoate	3	0	2.6695	0	2.8481	0	0	0	0	0.6897	1.27797	0.483026	0	0	0	0	0	0	0	0	0	3.6179	4.2915	4.7204	0	0	0	2.10497	2.33251	0.952244	0	0	0	0	0	0	0	0	0	0	0	0
	575	2.3583	485.358				Unidentified	4	5.2001	3.8734	4.7972	5.9596	7.1406	7.5665	8.1283	0	5.33321	2.6005	0.982898	4.5657	7.1075	7.2276	6.087	9.9161	9.5946	7.41642	2.05026	0.837017	5.1903	5.982	7.5664	7.2779	10.4763	14.1798	8.44545	3.34089	1.36391	6.5166	6.4724	7.1163	4.5464	6.4074	9.804	10.2097	7.29611	2.01857	0.762947	6.3146	4.2618
	576	2.3584	299.134				Isotope	4	0	0	0	0	0	0	0	0	0	0	0	0	0	0	0	0	0	0	0	0	0	0	0	0	0	0	0	0	0	0	0	0	0	0	0	0	0	0	0	0	0
	577	2.3586	717.198	C23H40N2O18;	HCOOK;	3.43001	Sialyllactosamine	3	0	0	0	0	0	0	0	0	0	0	0	0	0	0	0	0	0	0	0	0	0	0	0	0	0	0	0	0	0	0	0	0	0	0	0	0	0	0	0	0	0
	578	2.3599	526.13	C17H25N9O6;C23H24ClN3O5;C22H29N3S2;C18H29N3O5S;	KCl;HCOONa;NaCl_HCOONa;NaCl_HCOONa;	3.40217	Tetrazolast meglumine; Ingliforib; Thiethylperazine; Lenapenem	3	0	0	0	0	0	0	0	0	0	0	0	0	0	0	0	0	0	0	0	0	0	1.5883	0	0	0	0	0.264717	0.648421	0.264717	0	0	0	0	0	0	0	0	0	0	0	0
	579	2.3618	438.122	C20H22ClN5O3;C22H25NO6;C17H25N5O4;C21H23NO4;C22H21NO3;C17H21N5O;	Na;K;KCl;HCOOK;Na_HCOONa;NaCl_HCOONa;	4.06272	(Chloro-Trimethoxy-Benzyl)-Pentylnyl-Purin-Ylamine; Colchicine; Isopentenyladenine-glucoside; Methyl-canadine; Methylcanadine; Melosatin A; FPL64176; Butyl-(Methoxybenzyl)-Purin-Amine; Butyl-(Methoxybenzyl)-Purin-Amine; Noberastine	3	0	0	0	0	3.112	0	0	0	0.389	1.10026	0.415858	0	3.121	3.9558	0	0	0	1.17947	1.84619	0.753705	0	0	0	0	0	0	0	0	0	5.7648	7.4327	5.9347	4.6437	5.2639	0	6.4022	5.06314	2.39831	0.906477	4.2468	2.9336
	580	2.3619	302.198	C16H23N5O;	H;	4.86434	Tegaserod	3	13.4105	13.7588	12.1725	19.7702	20.3942	20.2024	19.2861	24.4123	17.9259	4.30042	1.6254	14.1868	18.3218	17.976	17.933	19.3525	19.3593	17.8549	1.90786	0.778883	23.7364	25.4074	22.1554	26.5382	32.1406	32.8951	27.1455	4.42542	1.80667	22.4287	20.118	22.8786	13.9659	22.6684	17.3874	22.6304	20.2968	3.43651	1.29888	18.0787	11.8435
	581	2.3621	993.89				Unidentified	4	0	0	2.8559	0	2.8791	0	0	0	0.716875	1.32741	0.501713	4.0866	0	0	0	0	0	0.6811	1.66835	0.6811	0	0	0	0	0	0	0	0	0	6.1508	4.7374	0	0	0	8.7551	6.4506	3.7277	3.68029	1.39102	0	0
	582	2.3628	224.093	C9H15N3;	NaCl;	4.95329	Tetrydamine	3	5.058	4.244	3.4739	3.9775	5.7768	5.408	0	0	3.49228	2.28453	0.863469	0	0	0	0	0	0	0	0	0	8.4058	8.3059	8.1418	12.2693	15.7742	13.7396	11.1061	3.28631	1.34163	0	0	0	0	0	0	0	0	0	0	0	0
	583	2.363	184.1				Unidentified	4	35.2007	31.4276	33.8641	38.8216	42.0268	48.285	51.1283	45.5625	40.7896	7.15242	2.70336	31.2049	40.6697	42.241	42.4463	41.4691	41.0552	39.8477	4.28815	1.75063	38.0817	38.681	43.1801	56.1614	66.8026	59.0038	50.3184	11.9785	4.89022	23.2634	28.0146	30.8636	20.7573	22.916	25.148	20.9841	24.5639	3.73378	1.41124	33.4173	32.9247
	584	2.3636	359.095	C11H16N4O4;C10H20N2O4;	Na_HCOONa;NaCl_HCOONa;	3.39744	Acetylcarnosine; Deoxycoformycin; Dexrazoxane; Icrf-187; Pentostatin; (Aminoethyl)-(Aminomethyl)Heptanedioic Acid; (Carboxyamino)-Amino-Nonanoic Acid; Mebutamate; Piperazine adipate; spermic acid 2	3	7.1006	5.7415	6.5098	7.705	6.6425	5.9098	11.2823	8.7138	7.45066	1.82436	0.689543	8.3221	9.2709	8.5458	10.8831	12.4503	13.7733	10.5409	2.22386	0.907886	5.3654	5.6427	5.0053	8.5141	11.1751	10.4528	7.69257	2.72987	1.11446	8.2266	8.9771	9.0237	8.4919	9.1655	10.3541	5.7873	8.57517	1.40098	0.529521	0	7.1017
	585	2.3639	118.066				Unidentified	4	30.1162	32.3718	32.2824	30.3088	26.6073	23.7465	41.0714	48.5989	33.1379	8.02926	3.03478	26.4723	25.8257	22.7226	23.7594	37.4234	40.7369	29.49	7.62368	3.11236	30.2219	18.0763	24.1847	46.6266	54.9558	65.2883	39.8923	18.6193	7.60132	7.4689	9.5255	9.6454	10.9407	7.8263	19.5757	11.7427	10.9607	4.09547	1.54794	9.5496	13.5007
	586	2.3648	973.223	C42H46O25;	Na;	1.51044	delphinidin 3-O-glucosyl-5-O-caffeoylglucoside-3'-O-glucoside	3	1.5136	0	0	0	0	0	0	0	0.1892	0.535138	0.202263	3.318	5.5338	4.2331	0	0	0	2.18082	2.4906	1.01678	0	0	0	0	0	0	0	0	0	2.5915	0	0	2.7622	4.1677	0	0	1.3602	1.76844	0.668408	3.3876	0
	587	2.3649	229.154	C14H22O;	Na;	2.26919	Alpha-Irone; Octylphenol	3	0	0	0	0	0	0	0	0	0	0	0	0	0	0	0	0	0	0	0	0	0	0	0	0	0	0	0	0	0	0	0	0	0	0	0	0	0	0	0	0	0
	588	2.3654	180.104				Unidentified	4	0	0	0	0	0	0	0	0	0	0	0	0	0	0	0	0	0	0	0	0	0	0	0	0	0	0	0	0	0	0	0	0	0	0	0	0	0	0	0	0	0
	589	2.3676	179.05				Unidentified	4	29.1918	23.3912	25.2654	32.5197	28.9681	29.1826	39.643	43.9989	31.5201	7.02342	2.6546	30.0975	36.565	34.0301	38.9127	46.9888	46.7223	38.8861	6.83035	2.78848	23.599	21.7902	23.2864	32.1578	41.4629	43.7699	31.011	9.72602	3.97063	30.7651	34.8914	34.3106	36.113	33.7081	40.9346	24.2256	33.5641	5.13489	1.94081	17.7618	27.9193
	590	2.3685	137.052	C8H8O2;	H;	0.0729609	Hydroxyacetophenone; 3,4-Dihydroxystyrene; 3-methoxybenzaldehyde; 3-Methylsalicylaldehyde; 3-Vinylcatechol; 4-Hydroxyphenylacetaldehyde; Benzylformate; methylbenzoate; Toluate; p-Anisaldehyde; Phenyl acetate;	3	1.6166	0	0	0.8296	0	0	0	0	0.305775	0.603992	0.228288	0	0	0	0	0	0	0	0	0	0.7453	0	0	0	0	0	0.124217	0.304267	0.124217	0	0	0	0	0	9.9386	0	1.4198	3.75644	1.4198	0	0
	591	2.3685	401.216	C16H25N5O6;C22H32N2O2;	NH3;Na_Na;	4.21219	dihydrozeatin-7-N-dihydrozeatin; dihydrozeatin-9-N-glucoside; Dihydrozeatin-O-glucoside; Dopexamine	3	10.0393	11.2123	8.3551	9.8274	11.8314	10.4743	9.1446	11.6927	10.3221	1.2278	0.464065	9.8329	10.6715	12.6943	11.1635	14.3593	13.0449	11.9611	1.69068	0.690218	8.3601	9.2093	9.1756	0	12.0993	13.1203	8.66077	4.63414	1.89188	13.1266	15.0949	13.2536	11.4255	13.5967	14.9283	14.3131	13.677	1.26087	0.476563	13.9955	11.7731
	592	2.3686	768.124	C21H36N7O16P3S;	H;	2.23922	2-Octenedioic acid / (iso)Butyrylcarnitine adduct; CoA; coenzyme A	3	5.6625	9.5893	9.3514	9.9284	8.477	9.8723	0	10.66	7.94261	3.552	1.34253	14.9744	16.9098	23.0943	20.9689	18.6564	21.3493	19.3255	3.04026	1.24118	0	0	0	0	0	0	0	0	0	26.5687	34.6014	34.212	27.1427	27.673	29.9279	35.5505	30.8109	3.88324	1.46773	27.7519	16.8244
	593	2.3688	182.095	C7H16ClNO2;C11H13N;C8H17NO;	H;Na;K;	0.604084	Acetylcholine chloride; Pargyline; Hygroline; Methyl-Hexyl-Formamide; Butyro-betaine; N-Heptylformamide; Pseudoconhydrine; Valnoctamide; Valpromide	3	0	0	0	0	0	0	0	0	0	0	0	0	0	0	0	0	0	0	0	0	0	0	0	0	0	0	0	0	0	1.6796	0	0	0	0	0	0	0.239943	0.634829	0.239943	0	0
	594	2.369	220.119	C9H17NO5;C10H13N5O;C9H14O5;C10H10N4O;	H;H;NH3;NH3;	3.13467	Pantothenic acid; Zeatin; Diethyl-methyl-oxosuccinate; Metamitron	3	105.498	96.2442	104.948	151.049	206.109	172.288	167.348	141.177	143.083	38.807	14.6676	86.0355	133.364	135.656	139.218	127.653	119.911	123.64	19.6252	8.01193	104.265	212.044	164.902	156.616	189.309	133.835	160.162	38.4549	15.6991	76.0668	86.6611	85.7313	65.8157	79.4791	61.6578	71.6526	75.2949	9.53331	3.60325	131.595	90.495
	595	2.3703	346.121	C17H19N3O3S;C15H21N3O3S;C20H21NO2;C11H23N3O2S;C19H19N;	H;Na;K;HCOOK;HCOOK;	3.38032	Omeprazole; Gliclazide; Moxaverine; leucyl-methioninamide; Phenindamine	3	4.0823	4.5257	3.3862	4.6342	5.1576	0	0	0	2.72325	2.31027	0.8732	4.1418	4.9703	5.6028	0	0	0	2.45248	2.72623	1.11298	3.5699	3.901	0	0	0	0	1.24515	1.93182	0.788661	4.4248	5.5617	6.2419	3.8187	5.8066	0	0	3.69339	2.65468	1.00338	2.7721	4.1346
	596	2.3704	310.13				Unidentified	4	196.855	214.416	181.494	209.22	229.007	160.335	174.465	184.821	193.827	22.7954	8.61584	91.7761	104.018	91.0898	87.253	95.3812	88.1532	92.9453	6.14367	2.50814	283.228	322.611	284.92	243.626	277.806	273.823	281.003	25.3391	10.3446	71.3851	71.5077	63.2839	56.2762	70.9298	0	0	47.6261	33.0009	12.4732	40.2372	71.1523
	597	2.3721	202.108	C9H12O4;C7H17N3;	NH3;NaCl;	0.296871	Hydroxy-oxo-methyloctadienoate; Methoxy-hydroxyphenylethyleneglycol; Antiarol; Carboxy-ethyl-cyclo-hexadiene-diol; Dehydrospermidine	3	51.5467	52.2901	49.4274	57.1591	70.7303	74.8959	78.6462	76.1468	63.8553	12.4055	4.68883	45.6992	59.588	64.1593	60.4194	67.5279	69.3799	61.129	8.47541	3.46007	57.9149	61.3083	68.1227	76.5501	99.5538	77.7009	73.5251	15.008	6.12698	31.9976	35.3149	40.0393	31.4744	33.3189	38.473	29.8715	34.3557	3.76875	1.42446	50.3456	50.5901
	598	2.3728	308.092	C10H17N3O6S;C18H13NO4;C17H11N5;C13H19NO4S;C16H15N3;	H;H;Na;Na;NaCl;	3.3107	Glutathione; Stealthin C; Letrozole; Probenecid; Epinastine	3	37.5191	37.1375	39.1658	48.4227	47.1735	43.8362	54.8977	67.7557	46.9885	10.3769	3.92212	48.4808	53.821	52.7866	65.0741	72.8165	71.8596	60.8064	10.4849	4.28043	37.9928	36.6437	33.5136	48.551	57.8795	66.8674	46.908	13.3094	5.43353	55.5665	55.1396	55.0863	46.3777	60.7402	65.3361	41.6378	54.2692	8.05488	3.04446	30.4865	42.166
	599	2.3739	136.063				Unidentified	4	10.7814	24.6243	20.7215	11.3676	10.3278	8.8506	0	7.9008	11.8217	7.65867	2.89471	5.7288	5.4865	3.2206	7.4943	7.47	9.4682	6.47807	2.15004	0.877748	65.5708	51.8707	41.0683	53.7237	54.3114	50.5543	52.8499	7.8709	3.21328	4.8772	6.0398	3.4784	5.8733	4.1389	8.011	1.5086	4.84674	2.08196	0.786906	6.4156	6.6444
	600	2.3747	90.0555				Unidentified	4	23.2212	21.3416	22.8278	25.9664	33.3871	37.6691	33.5686	29.4277	28.4262	6.00197	2.26853	21.6988	28.1981	29.9224	29.905	28.7713	20.7439	26.5399	4.18387	1.70806	28.1484	32.1298	32.3003	36.7354	40.4592	25.5752	32.5581	5.44671	2.22361	15.9357	18.9328	13.8853	15.0804	15.945	15.0894	14.6066	15.6393	1.62205	0.613076	25.8755	22.2817
	601	2.376	144.086	C4H6N4O;	NH3;	4.09474	2,4-Diamino-6-hydroxypyrimidine; 5-Amino-4-imidazolecarboxyamide	3	30.7845	34.4407	30.947	34.4621	31.3263	30.8309	32.8227	39.2433	33.1072	2.92187	1.10436	30.6466	30.4239	25.0906	27.3486	34.4452	36.7585	30.7856	4.32353	1.76507	37.3448	25.7511	31.6915	44.0144	42.0079	61.3008	40.3518	12.2657	5.00747	10.6108	15.6964	13.0625	15.5886	13.873	19.4656	12.7919	14.4413	2.82112	1.06628	13.186	17.2986
	602	2.3766	282.135				Multiply Charged ion - not identified	4	2.9719	3.8491	3.4184	4.9548	3.5871	4.9997	0	0	2.97262	1.96598	0.743071	0	0	0	0	0	0	0	0	0	5.997	6.848	5.5428	7.9571	0	0	4.39082	3.49919	1.42854	0	0	0	0	0	0	0	0	0	0	0	0
	603	2.3769	217.106	C6H16N6;	Na_Na;	0.460586	Diguanidinobutane	3	3.3811	0	2.9529	0	3.1053	0	0	0	1.17991	1.63256	0.61705	0	0	0	0	0	0	0	0	0	0	3.6203	0	0	0	0	0.603383	1.47798	0.603383	0	0	0	0	0	0	0	0	0	0	0	0
	604	2.3776	76.0243				Unidentified	4	4.1989	2.7667	0	2.8711	3.2529	0	0	0	1.6362	1.80051	0.680527	3.5842	2.781	0	5.7281	8.2024	9.5282	4.97065	3.55565	1.45159	0	1.7498	0	0	0	0	0.291633	0.714353	0.291633	3.217	0	0	3.4213	3.8479	9.2104	0	2.8138	3.3234	1.25613	0	2.9546
	605	2.3781	542.075				Unidentified	4	2.4839	3.0194	0	0	0	0	0	0	0.687913	1.28178	0.484468	0	0	0	0	0	0	0	0	0	0	2.9565	0	0	0	0	0.49275	1.20699	0.49275	3.0015	0	0	0	2.7201	0	0	0.817371	1.39829	0.528504	2.8713	0
	606	2.3787	349.144				Multiply Charged ion - not identified	4	22.6687	25.5915	23.2257	29.5561	27.5405	31.0748	23.5688	26.432	26.2073	3.05865	1.15606	14.3326	17.2916	16.6512	14.2141	16.8482	14.5089	15.6411	1.43052	0.584007	36.9051	40.42	39.8653	48.5663	49.695	46.9767	43.7381	5.32885	2.17549	7.2201	7.3043	6.8867	4.874	5.0016	0	0	4.46953	3.21051	1.21346	3.6649	8.1044
	607	2.3797	541.125	C30H22N4O4;C21H35Cl2MnN5;C22H26O10;	K;NaCl;Na_HCOONa;	4.02862	Adozelesin; Imisopasem manganese; Auriculoside	3	5.5789	5.8172	5.7502	8.0302	8.4717	8.1037	0	0	5.21899	3.42365	1.29402	7.6081	8.1956	6.3712	6.7108	0	0	4.81428	3.78455	1.54504	6.4328	8.3112	6.4963	0	0	0	3.54005	3.93617	1.60693	7.547	10.7796	8.8593	7.8278	7.9181	0	6.9596	7.12734	3.37782	1.27669	4.4611	6.5645
	608	2.38	631.163	C28H32O15;C29H28N4O11;C27H30O13;C28H34O8S2;C25H32O13;C33H30N4O2;	Na;Na;HCOONa;HCOONa;Na_HCOONa;NaClx2;	4.24613	Diosmin; Physcion 8-gentiobioside; Edotecarin; Edotecarin; Flavonol 3-O-beta-D-glucosyl-(1->2)-beta-D-glucoside; Ecamsule; 10-Deoxygeniposide tetraacetate; 7-Deoxygardoside metyl ester tetraacetate; Oleuropein; Telmisartan	3	1.7343	0	0	3.2615	2.8981	0	0	0	0.986738	1.42703	0.539368	0	0	0	0	0	0	0	0	0	5.0356	4.8801	4.5053	0	0	0	2.4035	2.63854	1.07718	1.4026	0	0	0	0	0	0	0.200371	0.530133	0.200371	0	0
	609	2.3811	655.187	C29H34O17;	H;	1.11418	Malvin; Monoxerutin	3	3.1654	3.0851	2.8768	3.269	4.1676	0	0	0	2.07049	1.75554	0.663532	0	0	0	0	0	0	0	0	0	3.6753	6.0693	5.3728	0	0	0	2.51957	2.86782	1.17078	1.9428	0	0	0	1.9945	0	0	0.562471	0.960719	0.363118	0	0
	610	2.3816	489.181	C18H32O15;C25H32ClFO5;C23H30N2O2S;C22H29F3O3;C22H31FO3;	H;Na;Na_HCOONa;Na_HCOONa;NaCl_HCOONa;	0.388404	Fucosyllactose; B-Trisaccharide; Clobetasol propionate; Linarotene; Flumedroxone; Fluoro-hydroxyandrostenone propionate; Fluoro-hydroxy-methyl-pregnene-dione;	3	3.9575	3.5191	3.739	4.1912	4.618	6.2791	0	0	3.28799	2.19929	0.831255	2.8354	3.8076	3.9594	0	0	0	1.76707	1.97378	0.805792	3.9662	4.8381	6.1519	0	0	0	2.4927	2.81789	1.1504	3.0156	0	0	0	3.7003	0	0	0.959414	1.65039	0.623789	2.5848	0
	611	2.3817	159.093				Unmatched Adduct	4	15.62	17.5651	16.6219	17.3699	16.2716	14.1673	14.2734	18.6768	16.3207	1.58625	0.599545	15.0034	14.5665	12.4729	15.0979	16.156	18.279	15.2626	1.91092	0.780131	18.6405	11.2636	14.1173	21.9396	21.3177	25.5456	18.8041	5.29999	2.16371	4.6805	7.0733	6.1577	7.5258	5.4574	8.2229	5.6837	6.40019	1.2557	0.47461	6.1986	8.5193
	612	2.3817	170.063				Unidentified	4	11.9874	11.7747	11.6217	13.3114	10.4866	9.5485	13.1701	15.9829	12.2354	1.96408	0.742353	10.5821	11.3723	9.945	10.933	11.3696	12.5386	11.1234	0.876726	0.357922	14.2693	10.1518	11.3867	15.0289	17.7197	20.3	14.8094	3.80433	1.55311	3.8037	0	4.6337	5.16	4.886	0	0	2.64049	2.50442	0.946582	4.2675	5.9659
	613	2.382	142.081				Unidentified	4	5.2926	5.0007	5.1602	5.6985	6.1752	8.8757	8.473	9.62	6.78699	1.88456	0.712295	4.0628	5.8612	6.1768	6.8511	8.914	8.9311	6.7995	1.88548	0.769744	6.552	6.1183	7.7048	10.0697	13.0566	13.2129	9.45238	3.16529	1.29222	2.8122	0	0	3.4189	3.4623	0	0	1.38477	1.73981	0.657588	4.8596	4.6625
	614	2.3822	472.189	C25H27N3O5;C21H26FN3O4;C23H30ClNO3;	Na;HCOONa;HCOONa;	3.43087	Cp-Coeleneterazine; Premafloxacin; Propantheline chloride	3	0.9249	0	0	0	0	0	0	0	0.115613	0.327002	0.123595	0	0	0	0	0	0	0	0	0	0	0	0	0	0	0	0	0	0	1.2764	0	0	0	0.8406	0	0	0.302429	0.531596	0.200924	0	0
	615	2.3826	527.124	C16H29N2O14P;C32H24O5;C14H29N6O11P;C27H24N4O3;C23H26N2O5S;	Na;K;K;KCl;HCOOK;	4.26844	diacetylchitobiose-6-phosphate; Dracorubin; O-1,4-alpha-L-Dihydrostreptosyl-streptidine 6-phosphate; 3'-Demethylstaurosporine; (1-Tert-Butyl-5-Hydroxy-1h-Pyrazol-4-Yl)-(6-Methanesulfonyl-4'-Methoxy-2-Methyl-Biphenyl-3-Yl)-Methanone; Acepromazine maleate	3	3.22	4.6188	4.3433	3.9487	4.9883	0	0	0	2.63989	2.24529	0.84864	0	2.8243	0	0	0	0	0.470717	1.15302	0.470717	5.9222	7.5471	7.8513	8.6927	0	11.4652	6.91308	3.84561	1.56996	0.8966	0	0	0	1.0004	0	0	0.271	0.46379	0.175296	0	0
	616	2.3832	116.036				Unidentified	4	6.444	5.8231	10.1553	7.0549	7.903	9.7928	10.2665	9.7918	8.40392	1.81125	0.684589	5.9603	6.7596	7.1653	8.9332	8.4156	10.7435	7.99625	1.73009	0.706305	7.8309	8.7039	8.2024	9.0174	14.1242	12.4292	10.0513	2.58751	1.05635	4.2724	5.1801	4.5145	4.3561	4.907	0	0	3.31859	2.28877	0.865073	6.3952	6.1762
	617	2.3853	706.06				Isotope	4	21.9496	18.203	18.0565	23.3279	27.8088	24.9778	23.8106	23.2715	22.6757	3.28603	1.242	25.1487	28.745	35.0994	30.5275	31.7828	39.6346	31.823	5.04888	2.0612	15.5317	10.6868	11.5773	12.5209	16.2367	17.6549	14.0347	2.81902	1.15086	34.3496	45.2712	41.6228	35.7589	33.0371	45.9573	41.6628	39.6657	5.26445	1.98978	28.773	27.0405
	618	2.3854	328.143	C18H23NO;C11H23N7;	NaCl;KCl;	2.98651	Bifemelane; Orphenadrine; Meladrazine	3	17.908	15.5799	16.986	18.3738	23.3782	19.619	16.3532	14.5526	17.8438	2.75113	1.03983	9.4925	13.8606	12.1208	8.7102	9.0341	0	8.8697	4.78729	1.9544	28.5828	35.5009	32.323	21.8107	26.8549	23.8526	28.1541	5.13748	2.09737	8.5305	7.6681	8.4025	6.0907	8.6467	0	0	5.61979	3.93614	1.48772	5.9609	8.5685
	619	2.3863	305.082	C13H18Cl2N2O2;C15H14N4S;C17H14N2;C14H18N2O;	H;Na;NaCl;KCl;	2.58946	Melphalan; MethylphenylSulfanyl-Quinazolinediamine; Ellipticine; Olivacine; Camoensine; Ibudilast; Isopropylantipyrine	3	14.3184	12.7306	13.8579	18.5136	19.8984	18.1018	16.258	22.9615	17.08	3.44831	1.30334	19.6767	23.548	21.6431	19.9972	21.5541	21.0585	21.2463	1.3863	0.565956	14.3902	16.1427	14.0774	20.3722	19.667	19.2645	17.319	2.79606	1.14148	23.4447	25.3135	24.7207	21.2416	26.1649	20.2018	14.3274	22.2021	4.0867	1.54463	13.4493	18.7842
	620	2.3872	152.06				Unidentified	4	3.2073	0	0	3.1921	3.4695	0	0	0	1.23361	1.70459	0.644273	2.6394	0	0	0	0	0	0.4399	1.07753	0.4399	2.7961	2.8451	4.5216	0	10.6223	0	3.46418	3.92906	1.60403	0	0	0	4.1187	3.1074	0	0	1.0323	1.787	0.675421	2.1218	2.801
	621	2.3876	483.123	C26H19FN4O2;C21H26O10;C18H26N2O5S2;C18H18N6O6;C20H24O8;	Na_Na;Na_Na;HCOONa;HCOONa;Na_HCOONa;	1.82148	Panazepide; Glaucolide B; (3r)-4-(P-Toluenesulfonyl)-1,4-Thiazane-3-Carboxylicacid-L-Leucine; Isoniazid pyruvinate; 10-epi-Eupatoroxin; Eupatoroxin; Vernodalol	3	0	0	0	0	0	0	0	0	0	0	0	0	0	0	0	0	0	0	0	0	0	3.0664	0	0	0	0	0.511067	1.25185	0.511067	0.9938	0	0	0	0	0	0	0.141971	0.375621	0.141971	0	0
	622	2.3889	988.3				Unidentified	4	19.2849	17.9983	16.5677	0	22.2796	17.8533	17.6045	20.6838	16.534	6.93032	2.61941	0	25.5386	0	24.5304	24.6425	25.0581	16.6283	12.8851	5.26031	11.3694	8.0198	0	8.5154	9.6156	0	6.25337	4.97845	2.03244	24.6842	0	0	28.6289	0	34.6551	25.5231	16.213	15.4989	5.85802	23.5619	0
	623	2.3893	170.119				Unidentified	4	0	0	0	0	0	0	0	0	0	0	0	0	0	0	0	0	0	0	0	0	0	0	0	0	0	0	0	0	0	0	0	0	0	0	0	0	0	0	0	0	0
	624	2.3895	178.088				Unidentified	4	0	3.0385	0	3.5909	2.8016	0	0	0	1.17888	1.64134	0.620369	0	0	0	0	0	0	0	0	0	5.4116	4.0131	0	0	0	0	1.57078	2.47331	1.00972	0.9894	0	0	0	0	0	0	0.141343	0.373958	0.141343	0	0
	625	2.3899	190.136	C9H19NOS;	H;	1.10453	Butyrylthiocholine; EPTC	3	0	0	0	0	0	0	0	0	0	0	0	0	0	0	0	0	0	0	0	0	0	0	0	0	0	0	0	0	0	0	0	0	0	0	0	0	0	0	0	0	0
	626	2.3901	146.061	C6H5FO2;	NH3;	1.30083	Fluorocatechol	3	140.511	139.813	179.336	217.214	151.062	135.138	149.469	158.838	158.923	27.3485	10.3368	160.728	114.323	121.625	118.23	131.649	133.042	129.933	16.7964	6.85712	198.969	112.665	141.292	179.75	182.829	214.193	171.616	37.8093	15.4356	48.0656	55.465	55.434	68.4744	57.9563	65.5061	57.4228	58.332	6.79854	2.56961	58.9729	73.0568
	627	2.3903	823.572				Isotope	4	24.2585	21.2381	20.6719	24.9854	28.6898	13.2191	22.6025	24.7109	22.547	4.52822	1.71151	27.0244	34.7346	34.4692	32.9624	34.5212	36.1608	33.3121	3.24336	1.3241	14.2709	13.3583	13.1439	12.458	14.402	16.8218	14.0758	1.52876	0.624113	35.4261	44.036	42.3284	40.4776	34.4832	47.1217	43.4193	41.0418	4.62075	1.74648	31.5772	33.7903
	628	2.3923	173.083	C8H12O4			2-Octenedioic acid	3	37.1812	44.23	45.0036	55.9867	54.5552	57.0921	42.895	45.2527	47.7746	7.19984	2.72128	54.7918	54.4793	55.9673	51.0594	45.8901	43.1726	50.8934	5.26255	2.14843	49.0969	55.5104	50.7657	50.4674	56.8644	47.9513	51.776	3.58822	1.46488	77.0318	85.0845	79.7706	77.7552	61.0627	79.0597	72.1616	75.9894	7.61696	2.87894	60.2917	53.9409
	629	2.3925	340.143	C16H21N3;	HCOOK;	0.235196	Tripelennamine	3	0	0	0	0	2.9625	0	0	0	0.370312	1.0474	0.395881	0	0	0	0	0	0	0	0	0	4.2948	3.6761	4.8512	0	0	0	2.13702	2.37032	0.96768	1.8709	0	0	0	0	0	0	0.267271	0.707134	0.267271	0	0
	630	2.3931	434.123	C22H21NO7;C18H20FN5O4;C18H23NO6;C18H24ClN3O2;C17H18FN5O2;C19H27NO3;C19H21N3O;	Na;Na_Na;HCOOK;HCOOK;Na_HCOONa;NaClx2;NaCl_HCOONa;	4.16933	Cetocycline; Gemifloxacin; Riddelline; Pancopride; 8-Benzo[1,3]Dioxol-,5-Ylmethyl-9-Butyl-2-Fluoro-9h-Purin-6-Ylamine"; Glycopyrrolate; Nateglinide; Protoemetine; Tetrabenazine; Alcaftadine; Talastine; Zolpidem	3	108.156	98.3622	104.183	175.098	144.205	139.802	125.398	143.522	129.841	25.8572	9.77312	190.92	187.947	189.577	159.423	158.678	136.928	170.579	22.2477	9.0826	121.979	114.905	108.154	107.079	115.606	109.579	112.884	5.67804	2.31805	195.968	174.098	204.135	203.658	214.996	120.525	90.8616	172.035	47.7764	18.0578	128.676	145.796
	631	2.3935	367.152	C17H20ClN3O3;C19H22N4O;C19H22O3;C16H26O4;	NH3;Na_Na;HCOONa;HCOOK;	1.25289	Azasetron; Aminacrine; Doisynoestrol; Glepidotin C; Ostruthin; Hydroxy juvenile hormone III; Oxo-hydroxy-hexadecadienoate	3	13.0648	14.1489	13.3413	16.5324	17.9634	16.164	11.0804	10.0769	14.0465	2.7264	1.03048	7.6733	8.6665	9.2775	7.0999	0	0	5.45287	4.29106	1.75182	22.189	23.0018	21.7221	18.0277	19.4429	19.4738	20.6429	1.9373	0.790898	4.0093	0	4.3403	3.1421	3.4925	0	0	2.1406	2.03748	0.770094	2.9364	4.0351
	632	2.3937	316.212	C16H29NO5;C16H26O5;C17H22N4O;	H;NH3;NH3;	2.0872	Butoctamide hydrogen succinate; Artemether; Ovalicin; Minaprine	3	44.7836	35.6163	28.6558	36.6379	49.7752	69.0146	77.231	62.1421	50.4821	17.3902	6.57287	25.8081	51.3929	56.236	45.0839	60.5253	56.8896	49.3226	12.6944	5.18247	46.3834	62.1553	67.5233	69.9654	89.4617	77.3234	68.8021	14.4858	5.91382	50.1636	68.4396	63.7782	21.954	47.8943	51.3881	45.3952	49.859	14.966	5.65662	32.6726	17.6777
	633	2.3947	458.233	C29H31NO4;C30H27N5;	H;H;	3.75354	Acolbifene; Benzylpiperazinyl-Naphthalenyl-Pyridinyl Pyrazine	3	6.3335	5.9451	5.6137	6.3206	7.4324	5.9602	0	0	4.70069	2.94991	1.11496	6.7614	5.9415	8.5068	8.0206	9.4047	8.5596	7.86577	1.28117	0.523037	3.9568	4.8633	5.3316	0	0	0	2.35862	2.62128	1.07013	6.5959	6.7504	5.7581	6.0008	6.8635	0	0	4.56696	3.14502	1.18871	6.9619	5.5522
	634	2.3955	437.235	C18H38O10;	Na;	0.457419	Nonaethylene Glycol	3	2.9196	0	0	0	2.9319	0	0	0	0.731437	1.35436	0.511901	0	0	1.5218	0	0	0	0.253633	0.621272	0.253633	0	3.3637	4.5787	0	0	0	1.32373	2.0864	0.85177	0	0	1.2646	0	0	0	0	0.180657	0.477974	0.180657	0	0
	635	2.3956	232.083	C13H11N3;	Na;	4.78276	Proflavine	3	10.7348	8.9014	9.9066	12.5841	16.6092	16.2484	9.3967	9.4252	11.7258	3.11734	1.17824	20.5863	15.4377	17.7177	14.5811	12.5824	9.7911	15.1161	3.79095	1.54765	5.1139	6.1539	4.9153	0	0	0	2.69718	2.98442	1.21838	17.7394	21.3049	17.1054	15.6036	23.4563	9.5583	5.7911	15.7941	6.23917	2.35818	8.1901	19.9898
	636	2.3963	241.1	C10H12N2O5;C10H9NO5;C10H14O;	H;NH3;Na_HCOONa;	3.31839	Dinoseb; Methyl-hydroxy-(carboxy-oxopropenyl)-1H-2-pyridon; Amino-hydroxyphenyl)-dioxobutanoate; Dihydro-dihydroxykynurenate; Malonylanthranilate; Isopiperitenone; Carvone; Menthofuran; Sabinone; Decatrienal; Butylphenol; Isopropyl-methylphenol; Adamantanone; Carvacrol; Chrysanthenone; Isopiperitenone; Menthofuran; Myrtenal; Cumic alcohol; Perillyl aldehyde; Pinocarvone; Piperitenone; Safranal; T…	3	1.2733	0	0	0	0	0	0	0	0.159163	0.45018	0.170152	0	0	0	0	0	0	0	0	0	0	2.0145	0	0	0	0	0.33575	0.822416	0.33575	0	0	0	0	0	0	0	0	0	0	0	0
	637	2.3963	563.169	C34H26O8;C22H30Cl2N10;C25H31FO8;C28H31ClN2O3;C22H39O7P;C26H35FO5;	H;NaCl;HCOOK;HCOOK;NaClx2;NaClx2;	2.34387	Albanol A; Chlorhexidine; Triamcinolone diacetate; Rhodamine 6G; PA(19:3) Fluocortin butyl	3	5.4055	4.2534	5.6589	6.9376	7.9147	6.7555	0	8.0397	5.62066	2.60893	0.986082	5.6586	8.8135	7.8594	8.4634	8.0618	0	6.47612	3.36003	1.37173	5.9081	6.6079	6.9263	0	0	0	3.24038	3.56492	1.45537	6.1921	7.8397	6.8398	4.6884	8.5154	0	0	4.86791	3.54031	1.33811	3.9039	5.9745
	638	2.3966	298.099				Unidentified	4	10.4148	30.0016	31.2907	11.9333	13.11	9.6334	0	0	13.298	11.8325	4.47228	6.6613	7.2389	0	0	6.7385	0	3.43978	3.77331	1.54045	85.2895	74.2933	54.8914	40.8855	38.7765	40.3936	55.755	19.8093	8.08712	0	0	5.6419	0	3.9314	0	0	1.36761	2.38727	0.902303	8.3156	8.0578
	639	2.3969	331.13	C19H19FO4;C17H16ClN3O;C15H15N5OS;C14H26O4Si;C8H18N6O4;	H;NH3;NH3;Na_Na;HCOONa;	3.95612	Flurbiprofen axetil; Amoxapine; (Methyl-Methylamino-Thiazolyl)-Pyrimidinylamino]-Phenol; Trioxycyclopentanone; Streptidine	3	3.1392	3.0467	3.2224	4.4738	3.7636	0	0	0	2.20571	1.88145	0.711122	0	0	0	0	0	0	0	0	0	5.533	5.7668	4.7243	0	9.7592	0	4.29722	3.75858	1.53443	0	0	0	0	0	0	0	0	0	0	0	0
	640	2.3975	560.157	C30H22O10;C20H29NO13;C25H33NO6;C25H27N3O4;	NH3;HCOONa;NaClx2;NaCl_HCOONa;	4.78438	Isochamaejasmin; (4-Hydroxymaltosephenyl)Glycine; Proansamitocin; Belotecan	3	0.8977	0	2.6952	0	3.0524	0	0	0	0.830662	1.30204	0.492124	0	0	0	0	0	0	0	0	0	5.063	5.3429	5.101	0	0	0	2.58448	2.83279	1.15648	0.4496	0.2455	0	0	0	0	0	0.0993	0.17953	0.0678561	0	0
	641	2.3984	124.08				Unidentified	4	5.1576	4.0761	4.5645	4.6581	4.2973	5.6242	8.1857	0	4.57044	2.25961	0.854053	3.2232	3.9371	5.7564	5.7387	0	0	3.10923	2.60594	1.06387	4.6733	3.8895	4.3665	0	9.7341	0	3.77723	3.6106	1.47402	2.2561	0	0	0	0	0	0	0.3223	0.852726	0.3223	3.5645	4.7864
	642	2.3988	144.014				Unidentified	4	1.6856	0	0	0	0	0	0	0	0.2107	0.59595	0.225248	0	0.5344	0	0	0	0	0.0890667	0.218168	0.0890667	0	1.1265	0	0	0	0	0.18775	0.459892	0.18775	1.4203	0	0	0	1.5372	0	0	0.4225	0.722345	0.273021	0	0
	643	2.3992	568.14	C28H27ClF5NO;C24H23N5O6;C27H25F2N3OS;C23H33NO8;C23H27N3O6;	Na_Na;Na_HCOONa;Na_HCOONa;NaClx2;NaCl_HCOONa;	0.88006	Penfluridol; Propargyl-Dideazafolic Acid; CB3717; Ritanserin; Sanfetrinem cilexetil; Ergometrine maleate; N-(Carboxy-Phenylpropyl)Phenylalanyl-Alpha-Asparagine	3	2.1226	0	0	0	3.3957	0	0	0	0.689787	1.32178	0.499587	0	0	0	0	0	0	0	0	0	7.1433	9.2856	5.9137	0	0	0	3.72377	4.21953	1.72262	0	0	0	0	1.0552	0	0	0.150743	0.398828	0.150743	0	0
	644	2.3998	697.185	C31H37ClN4O5S;C28H42Cl4N4O2;C35H36N2O6;C26H33F3N4O7;	HCOOK;Na_HCOONa;NaClx2;NaCl_HCOONa;	1.5204	Ispinesib mesylate; Ambenonium chloride; Daphnoline; 2-[4-[[(S)-1-[[(S)-2-[[(Rs)-3,3,3-Trifluoro-1-Isopropyl-2-Oxopropyl]Aminocarbonyl]Pyrrolidin-1-Yl-]Carbonyl]-2-Methylpropyl]Aminocarbonyl]Benzoylamino]Acetic Acid	3	5.0908	6.2122	7.1175	7.6843	8.4418	8.9732	8.1943	8.045	7.46989	1.28018	0.483864	4.7646	0	5.4567	0	0	0	1.70355	2.64819	1.08112	5.8039	5.8873	4.2942	7.5709	0	0	3.92605	3.21313	1.31175	4.4222	0	4.6119	2.9182	4.9797	0	0	2.41886	2.35169	0.888855	0	3.571
	645	2.4	513.132	C20H22N8O5;C15H28N2O11S;C23H24O9;C20H28O10;C22H23ClN6O;C25H32O2S;C22H28N4O3;	NaCl;HCOONa;HCOONa;HCOOK;Na_HCOONa;NaClx2;NaClx2;	4.73556	Methotrexate; desacetylmycothiol; 6-methoxypodophyllotoxin; Furcatin; Losartan; Etarotene; Etonitazene	3	1.0979	0	0	0	0	0	0	0	0.137238	0.388166	0.146713	0	0	0	0	0	0	0	0	0	0	1.9249	0	0	0	0	0.320817	0.785837	0.320817	1.6541	0	0	0	2.1599	0	0	0.544857	0.941907	0.356007	0	0
	646	2.4008	433.14	C24H26O5;C21H27FO6;C22H23FN4O2;C25H25ClN2;C22H22N4O2;C21H27ClN2O2;C19H26N4O3;C18H24N2O4S;C14H24N2O9;	K;K;K;Na_Na;NaCl;NaCl;KCl;HCOONa;HCOONa;	2.93207	Pentomone; Triamcinolone; Neflumozide; Quinaldine blue; Indole Naphthyridinone; Pyrimidine-dicarboxylic acid bis-(methyl-benzylamide); Hydroxyzine; N2-[(Benzyloxy)Carbonyl]-N1-[(3s)-1-Cyanopyrrolidin-3-Yl]-L-Leucinamide; Tranylcypromine sulfate; N-Acetylmuramoyl-Ala	3	3.2429	2.6025	0	0	3.8068	0	0	0	1.20653	1.69603	0.641037	4.8424	3.9032	5.1481	0	0	0	2.31562	2.5696	1.04904	0	0	0	0	0	0	0	0	0	0	8.6495	9.3525	0	7.8903	0	0	3.6989	4.63262	1.75097	0	3.1366
	647	2.4008	596.176	C30H26O12;C27H29NO10;C25H31N3O6;C25H32ClN5O2;	NH3;HCOONa;NaCl_HCOONa;NaCl_HCOONa;	3.03601	Proanthocyanidin; Epicatechin-ent-epicatechin; Pelargonidin(-coumaroyl)glucoside; Procyanidin B4; Daunorubicin; Esorubicin; Methysergide maleate; Nefazodone	3	15.5874	12.5152	14.6495	17.153	17.4068	15.5844	17.6511	14.8323	15.6725	1.72588	0.65232	17.8851	21.4416	18.921	18.9566	18.5785	17.7254	18.918	1.33974	0.546946	12.9932	15.4075	11.4239	13.3581	14.5083	19.1841	14.4792	2.67576	1.09238	23.2238	23.5878	21.0548	16.2988	23.5539	10.3511	6.8215	17.8417	6.89048	2.60436	6.2944	17.9365
	648	2.4013	289.089	C12H12N6OS;C13H15Cl2NO;C9H16N4O4;C14H18N2;	H;NH3;Na_Na;KCl;	1.00316	Diamino-(Imidazolylsulfanylmethyl)-3h-Quinazoline-One; Clorgyline; Amidinoproclavaminate; Guanidinoproclavaminic acid; Cyclindole	3	0	0	0	0	0	0	0	0	0	0	0	0	0	0	0	0	0	0	0	0	0	2.21	0	0	0	0	0.368333	0.902229	0.368333	2.57	0	0	0	0	0	0	0.367143	0.971369	0.367143	0	0
	649	2.4032	855.407				Unidentified	4	0.1947	0	0	0	0	0	0	0	0.0243375	0.0688368	0.0260179	0	0	0	0	0	0	0	0	0	0	0.7877	0	0	0	0	0.131283	0.321577	0.131283	3.9202	0	0	0	3.6535	0	0	1.08196	1.8494	0.699006	0	0
	650	2.4034	232.156	C11H21NO4			(iso)Butyrylcarnitine	2	499.893	536.353	495.891	691.071	673.093	595.296	451.043	458.314	550.119	93.2954	35.2624	627.161	749.043	618.981	542.336	462.797	351.154	558.579	139.35	56.8893	691.409	777.472	592.09	433.555	497.703	397.653	564.98	149.445	61.0107	847.599	890.518	970.513	867.676	645.534	659.103	747.466	804.059	122.794	46.4117	732.573	659.438
	651	2.4046	249.136	C15H18N2;	Na;	4.77648	Methylergoline	3	1.0854	0	0	0	0	0	0	0	0.135675	0.383747	0.145043	0	0	0	0	0	0	0	0	0	0	0	0	0	0	0	0	0	0	0	0	0	0	0	0	0	0	0	0	0	0
	652	2.4056	493.156	C24H32ClFO5;C19H26N6O6;C24H31FO5;C24H34O4S;C20H30O6;	K;NaCl;KCl;KCl;NaCl_HCOONa;	1.35859	Halcinonide; Xanthinol niacinate; Descinolone acetonide; Fluorometholone 17-acetate; Fluorometholone acetate; 17beta-Hydroxy-4-mercaptoandrost-4-en-3-one 4-acetate 17-propionate; 11-dehydro-15-keto-TXB2; 11-dehydro-TXB3; 12-oxo-10,11-dihydro-20-COOH-LTB4; 12-oxo-20-dihydroxy-leukotriene B4; 20-carboxy-leukotriene-B4; 20-COOH-Leukotriene B4;Bis(2-butoxyethyl)phthalate; Chaparrolide	3	4.1192	4.1204	4.5747	5.0085	6.1375	5.4421	0	0	3.6753	2.36586	0.894212	6.8239	7.3089	7.3236	7.2244	7.4507	0	6.02192	2.95786	1.20754	0	5.7985	4.4734	0	0	0	1.71198	2.68509	1.09618	6.8041	7.0421	7.1669	5.501	6.5844	0	0	4.72836	3.27529	1.23794	4.1095	4.489
	653	2.406	699.202	C35H38N2O6;	NaClx2;	1.73055	Norberbamunine	3	1.4445	0	0	0	0	0	0	0	0.180562	0.510708	0.193029	0	0	0	0	0	0	0	0	0	0	0	0	0	0	0	0	0	0	0	0	0	0	1.2667	0	0	0.180957	0.478768	0.180957	0	0
	654	2.4061	428.04	C18H19Cl2NO4;C14H15Cl2N3O4;C11H22NO7P;C18H17NO4;	Na_Na;HCOONa;NaClx2;NaClx2;	3.27073	Felodipine; Imazalil nitrate; lysoPC(3:1); 5-Methoxy-1,2-Dimethyl-3-(Phenoxymethyl)Indole-4,7-Dione; Acronidine; Actinodaphnine; Cularicine; IC261	3	3.0079	3.4588	4.1969	5.851	5.3927	0	0	0	2.73841	2.448	0.925257	4.0678	3.3534	4.2772	5.4519	0	0	2.85838	2.31464	0.944948	5.1443	5.2588	4.7418	0	0	0	2.52415	2.7704	1.13101	4.7135	6.4171	5.911	6.8823	5.9411	0	0	4.26643	2.98837	1.1295	6.3295	4.0483
	655	2.4066	261.144	C11H20N2O5;C14H22O3;C11H17NO5;C12H13N5O;C12H24O3;C13H20O;C11H22O;	H;Na;NH3;NH3;Na_Na;HCOONa;Na_HCOONa;	1.53172	Glutamyl-isoleucine; Glutamyl-leucine; Dihomo-jasmonic acid; Hydroxy-tetradeca-trienoate; Carbidopa; Topolin; Hydroxy-dodecanoic acid; Hydroxy lauric acid; Tridecatrienal; Heptylphenol; Lonone; Undecanone; Undecanal	3	19.0017	19.3857	17.3593	21.3598	23.7873	23.1596	20.0098	19.8604	20.4904	2.15865	0.815892	19.5739	21.6618	20.97	17.9257	16.3917	17.1635	18.9478	2.12646	0.868123	23.5249	19.9342	22.8843	22.867	18.6708	18.9668	21.1413	2.19028	0.894177	6.7671	10.25	9.7674	6.9769	9.9043	0	6.9489	7.23066	3.54356	1.33934	20.1659	18.5393
	656	2.4071	454.184	C19H31NO6;C20H27N5O2;	HCOOK;HCOOK;	0.506403	Pramanicin; Cilostazol	3	3.0107	2.9405	0	3.2919	4.8543	4.931	0	0	2.37855	2.11006	0.797527	4.8186	5.013	4.5973	0	0	0	2.40482	2.63763	1.07681	0	0	0	0	0	0	0	0	0	7.3443	9.6744	10.9665	9.9087	10.3754	12.0004	0	8.60996	4.05623	1.53311	7.2365	6.2462
	657	2.4077	850.751				Multiply Charged ion - not identified	4	0	7.5985	0	0	9.0901	0	0	0	2.08608	3.88318	1.4677	7.4748	9.002	7.6955	5.8933	7.6929	8.7019	7.7434	1.09569	0.447313	0	6.4873	0	0	0	0	1.08122	2.64843	1.08122	11.9067	0	13.6159	12.7489	11.0223	12.5933	8.2026	10.0128	4.7481	1.79461	5.9029	0
	658	2.4078	988.096				Isotope	4	20.3466	0	18.6203	21.0205	25.006	16.7883	18.8038	17.8443	17.3037	7.42928	2.808	21.5249	29.4891	28.2155	26.0948	21.4062	27.3271	25.6763	3.44538	1.40657	9.5906	8.6644	10.5981	7.7658	10.8312	11.493	9.82385	1.41666	0.578348	28.3431	32.431	30.4221	31.8921	25.5755	33.5139	34.9389	31.0167	3.20142	1.21002	26.7164	25.9247
	659	2.4084	213.132	C9H16N4O2;C10H20N2;	H;Na_Na;	0	Aminomethyl-Triazolyl-Methylpentanoic Acid; Piperidino-Piperidine	3	4.2099	3.6971	4.8769	4.9245	5.5478	4.8835	0	0	3.51746	2.2384	0.846035	4.1842	4.0421	4.7905	5.3542	7.0501	8.3665	5.63127	1.72613	0.704691	6.4073	5.6635	4.803	0	0	0	2.8123	3.12229	1.27467	3.795	0	4.3389	4.3965	4.6902	0	1.4431	2.66624	2.11644	0.799938	4.4426	4.2069
	660	2.4095	661.175	C31H33F3N2O5S;C25H30N8O10;C28H32O14;	NaCl;NaCl;HCOONa;	1.08897	Tipranavir; Formyltetrahydrofolyl L-glutamate; Bis-O-sinapoyl-beta-D-glucoside; di-O-sinapoyl-beta-D-glucose; O-Methylvitexin -O-beta-L-rhamnoside	3	0.7287	0	0	0	0	0	0	0	0.0910875	0.257634	0.0973766	0	0	0	0	0	0	0	0	0	0	0	0	0	0	0	0	0	0	0	0	0	0	0	0	0	0	0	0	0	0
	661	2.4097	618.052				Unidentified	4	8.5502	7.9872	9.5812	11.2228	12.766	0	0	0	6.26342	5.39548	2.0393	0	15.4448	17.1346	0	0	0	5.4299	8.42892	3.44109	0	5.364	0	0	0	0	0.894	2.18984	0.894	19.0454	21.0704	0	0	16.8974	10.3673	0	9.62579	9.58386	3.62236	0	0
	662	2.4104	126.056				Unidentified	4	2.3168	0	2.7296	0	3.8447	0	0	0	1.11139	1.59098	0.601334	3.3604	2.9622	0	0	0	0	1.05377	1.63734	0.66844	0	0	0	0	0	0	0	0	0	3.4314	4.3912	0	3.4272	3.9975	0	0	2.17819	2.06444	0.780284	2.3658	3.5056
	663	2.4111	612.131	C26H41Br2NO4;C19H33N3O14P2;C26H30ClN5O3;	Na;Na;NaClx2;	4.88458	Pinaverium bromide; dTDP-dimethylamino-dideoxy-C-methyl-L-mannose; Diphenylpyraline teoclate	3	0	0	0	0	0.5596	0	0	0	0.06995	0.197848	0.0747797	0	1.3388	0	0	0	0	0.223133	0.546563	0.223133	0	0	0	0	0	0.4183	0.0697167	0.17077	0.0697167	0	0	0	0	0	0	0	0	0	0	0	0
	664	2.4112	987.693				Multiply Charged ion - not identified	4	6.3728	5.3218	0	0	9.0789	5.2866	0	0	3.25751	3.67263	1.38812	0	0	0	7.9254	9.149	9.1539	4.37138	4.80949	1.96347	3.3712	2.8326	0	0	0	0	1.03397	1.61084	0.657624	9.8794	0	9.7023	0	0	11.8279	8.9312	5.76297	5.46077	2.06398	0	9.1133
	665	2.4116	269.189	C19H24O;	H;	0.334336	Methoxyestra-tetraene; Ethyl-methylphenyl)butyl]phenol	3	1.0388	0	0	0	0	0	0	0	0.12985	0.367271	0.138815	0	0	0	0	0	0	0	0	0	0	1.5862	0	0	0	0	0.264367	0.647563	0.264367	0.701	0	0	0	0.8678	0	0	0.224114	0.385765	0.145805	0	0
	666	2.4119	792.087				Unidentified	4	3.2371	3.3	0	0	0	0	0	0	0.817137	1.51314	0.571912	4.9279	5.5246	5.132	6.7382	0	0	3.72045	2.94943	1.2041	0	0.5902	0	0	0	0	0.0983667	0.240948	0.0983667	5.3881	8.5705	7.6117	7.3221	5.3477	10.433	7.912	7.51216	1.78203	0.673544	4.7987	5.5896
	667	2.412	729.354				Multiply Charged ion - not identified	4	5.2904	6.3892	6.3367	7.4602	8.2283	8.2355	0	0	5.24254	3.38639	1.27993	0	0	8.3458	6.1843	7.6357	0	3.6943	4.10645	1.67645	7.0819	5.8167	6.3279	0	0	0	3.20442	3.53327	1.44245	9.619	11.0038	11.2955	12.3578	9.488	11.5005	8.6316	10.5566	1.32965	0.502561	0	0
	668	2.4121	295.099	C14H16F2N2;C9H14N4O3;C7H16N4O3;	Na_Na;HCOONa;Na_HCOONa;	2.33819	Flucindole; Erythro-Dihydroxypropyl-tetrahydro-4a-; Carnosine; Nimorazole; Hydroxy-homoarginine	3	0	7.428	7.4449	8.6872	8.8867	8.3855	0	0	5.10404	4.2586	1.6096	7.0615	7.7275	6.624	8.1169	7.9066	13.2977	8.4557	2.43682	0.994828	9.1418	8.0227	7.1047	0	0	0	4.04487	4.47766	1.828	5.5469	5.7353	6.3523	7.2305	6.3196	9.8035	6.952	6.84859	1.43457	0.542217	3.9797	6.9668
	669	2.4144	603.802				Unidentified	4	1.2528	0	0	0	0	0	0	0	0.1566	0.442932	0.167412	0	0	0	0	0	0	0	0	0	0	1.2167	0	0	0	0	0.202783	0.496716	0.202783	3.5549	0	0	0	3.4448	0	0	0.999957	1.70805	0.645581	0	0
	670	2.4147	258.17	C14H16N4;	NH3;	3.95088	Budralazine; Imiquimod; Simtrazene	3	1.1799	0	0	0	0	0	0	0	0.147487	0.417158	0.157671	0	0	0	0	0	0	0	0	0	0	2.5585	0	0	0	0	0.426417	1.0445	0.426417	1.388	0	0	0	1.2774	0	0	0.380771	0.651074	0.246083	0	0
	671	2.4149	130.058				Unidentified	4	4.4113	4.1173	5.2194	4.9027	4.9989	4.7006	0	7.8608	4.52637	2.16011	0.816446	3.8785	4.2906	5.1841	0	0	0	2.22553	2.47422	1.0101	6.1582	6.1397	5.0531	0	9.9388	0	4.5483	3.89386	1.58966	3.7874	0	0	3.1872	4.5058	0	0	1.64006	2.08072	0.786438	2.4534	3.1519
	672	2.4157	987.889				Isotope	4	14.9192	0	0	0	0	0	11.2733	0	3.27406	6.14019	2.32078	0	0	0	0	0	0	0	0	0	0	6.8901	5.9859	0	0	0	2.146	3.33684	1.36226	25.0507	0	0	0	5.3514	0	0	4.34316	9.34642	3.53262	0	22.5228
	673	2.4158	618.179				Isotope	4	6.0716	0	0	0	0	0	0	0	0.75895	2.14663	0.811352	0	0	0	0	0	0	0	0	0	0	4.0949	0	0	0	0	0.682483	1.67174	0.682483	13.8605	0	0	0	12.3137	0	0	3.73917	6.40144	2.41952	0	0
	674	2.4162	194.109				Unidentified	4	2.7006	0	0	0	0	0	0	0	0.337575	0.954806	0.360883	2.3424	0	0	0	0	0	0.3904	0.956281	0.3904	0	0	0	0	0	0	0	0	0	0	0	0	0	0	0	0	0	0	0	0	0
	675	2.4168	472.244	C23H35N3O6;C28H35NO4;C24H37NO3;	Na;Na;HCOOK;	4.46803	N-Acetyl-leu-leu-tyr; Asoprisnil; Myxalamid C	3	5.0578	5.3507	5.7401	5.4177	5.5619	6.1089	0	0	4.15464	2.58227	0.976006	6.6932	6.7739	6.3889	6.6841	8.1394	8.2116	7.14852	0.806517	0.329259	4.2352	4.8068	0	0	0	0	1.507	2.34162	0.955963	4.8989	6.2592	5.8664	6.3017	7.2485	0	7.1951	5.39569	2.51061	0.948923	6.448	5.8449
	676	2.4171	739.199	C40H36N4O6S;C25H42N4O14;	K;NaClx2;	4.65369	Olanzapine pamoate; Allosamidin	3	0.3714	0	0	0	0	0	0	0	0.046425	0.13131	0.0496304	0	0	0	0	0	0	0	0	0	0	0	0	0	0	0	0	0	0	0	0	0	0	0	0	0	0	0	0	0	0
	677	2.4173	512.179	C22H28FNaO8S;C25H31N3O4;C25H33NO3;	NH3;KCl;NaClx2;	0.0390493	Dexamethasone sodium hemisulfate; Alpertine; Lunarine; 6-Phenyl-4(R)-(7-Phenyl-Heptanoylamino)-Hexanoic Acid	3	0	0	0	0	0	0	0	0	0	0	0	0	0	0	0	0	0	0	0	0	0	0	0	0	0	0	0	0	0	0	0	0	0	0	0	0	0	0	0	0	0
	678	2.4182	329.187	C15H24N2O4S;	H;	0.455715	Tiapride	3	2.9937	0	0	0	0	0	0	0	0.374213	1.05843	0.40005	0	1.0792	0	0	0	0	0.179867	0.440582	0.179867	0	0	0	0	0	0	0	0	0	0	0	0	0	2.7366	0	0	0.390943	1.03434	0.390943	0	0
	679	2.4182	850.921				Isotope	4	6.0139	0	0	0	0	0	0	0	0.751737	2.12623	0.803641	0	0	0	0	6.6125	0	1.10208	2.69954	1.10208	0	4.5298	0	0	0	0	0.754967	1.84928	0.754967	8.2018	0	0	0	9.1542	0	0	2.47943	4.24335	1.60383	5.2839	0
	680	2.4185	427.177	C16H28N4O8;C25H28N2O2;C22H20FN3O4;C24H32O2;	Na;K;NH3;KCl;	3.32414	Tetraxetan; Acrisorcin; Cinperene; [(Dihydroxy-Propylamino)-Phenyl]-(Fluoro-Methyl-1h-Indolyl)-Pyrrole-Dione; Quinbolone	3	2.7422	0	0	3.7272	0	0	0	0	0.808675	1.52034	0.574635	0	1.2753	0	0	0	0	0.21255	0.520639	0.21255	4.6634	5.5542	4.3443	0	0	0	2.42698	2.68804	1.09739	0	0	0	0	0	0	0	0	0	0	0	0
	681	2.4194	281.105	C15H18N2O;C14H14ClNO2;C9H11F2N3O4;C9H16N4S;	K;NH3;NH3;HCOONa;	1.88542	Octahydroindolo[2,3-a]Quinolizin-(6h)-One; Huperzine A; Selagine; Clopirac; Gemcitabine; Burimamide	3	3.0582	5.5626	3.2759	5.4285	5.2368	6.1589	0	0	3.59011	2.47098	0.933942	4.9799	6.0949	4.9225	6.0143	0	0	3.6686	2.88438	1.17754	4.2298	4.2179	5.5938	0	0	0	2.34025	2.61197	1.06633	2.8556	0	0	3.2482	3.3243	0	0	1.34687	1.68611	0.637289	4.4767	3.8572
	682	2.4201	435.128	C22H21NO7;C18H20FN5O4;C18H23NO6;C18H24ClN3O2;C17H18FN5O2;C19H27NO3;C19H21N3O;	Na;Na_Na;HCOOK;HCOOK;Na_HCOONa;NaClx2;NaCl_HCOONa;		Cetocycline; Gemifloxacin; Riddelline; Pancopride; 8-Benzo[1,3]Dioxol-,5-Ylmethyl-9-Butyl-2-Fluoro-9h-Purin-6-Ylamine"; Glycopyrrolate; Nateglinide; Protoemetine; Tetrabenazine; Alcaftadine; Talastine; Zolpidem	3	0	0	0	0	0	0	0	0	0	0	0	0	57.7203	0	0	0	0	9.62005	23.5642	9.62005	0	0	0	0	0	0	0	0	0	0	0	0	0	47.8918	0	0	6.84169	18.1014	6.84169	0	0
	683	2.4209	334.202				Unmatched Adduct	4	0	0	0	0	1.3681	0	0	0	0.171013	0.483696	0.18282	0	0	0	0	0	0	0	0	0	0	0	0	0	0	0	0	0	0	0	0	0	0	0	0	0	0	0	0	0	0
	684	2.4214	416.119				Unidentified	4	0	0	0	0	0	0	0	0	0	0	0	2.5392	5.1478	0	0	0	0	1.28117	2.14937	0.877478	0	0.8777	0	0	0	0	0.146283	0.35832	0.146283	3.5215	5.2128	0	3.1103	4.7208	0	0	2.36649	2.32136	0.877393	0	2.593
	685	2.4229	199.11				Unidentified	4	2.7866	3.5995	3.3742	3.9323	4.119	0	0	0	2.22645	1.88525	0.712559	0	0	0	0	0	0	0	0	0	5.4716	6.587	6.1569	0	0	0	3.03592	3.34466	1.36545	0	0	0	0	0	0	0	0	0	0	0	0
	686	2.4231	578.215	C26H33N7O5S;C26H39NO6S;C18H37N5O8;	Na;HCOOK;NaCl_HCOONa;	3.14761	[ETHANESULFONYLAMINO-(INDOLYL)-PROPIONYLAMINO]-PENTANEDIOIC ACID-AMIDE-(-CARBAMIM IDOYL-BENZYLAMIDE); Epothilone A; Dibekacin	3	0	2.7205	0	0	2.4189	0	0	0	0.642425	1.19227	0.450635	0	0.4434	0	0	0	0	0.0739	0.181017	0.0739	3.9857	3.3157	0	0	0	0	1.2169	1.89708	0.77448	0	0	0	0	0.5778	0	0	0.0825429	0.218388	0.0825429	0	0
	687	2.4235	491.151	C22H30N4O2S2;C23H34O2S;C19H28N2O5;	Na_Na;NaClx2;NaCl_HCOONa;	4.94756	Thioproperazine; Tinabinol; WRR-99	3	3.9979	3.2715	2.855	4.6164	5.0074	0	0	0	2.46853	2.15384	0.814075	4.1842	3.1972	4.5317	0	0	0	1.98552	2.21866	0.905764	5.207	5.7552	4.9014	0	0	0	2.64393	2.90918	1.18767	3.7547	4.6213	4.65	3.8365	5.1647	0	0	3.14674	2.20437	0.833175	2.8951	2.4805
	688	2.4239	690.055	C17H25N3O18P2;C22H30ClN3O6S3;	HCOONa;NaCl_HCOONa;	1.05789	UDP-N-acetyl-amino-deoxy-D-glucuronate; UDP-N-acetyl-mannosaminouronate; UDP-N-acetyl-D-galactosaminuronic acid; UDP-N-acetyl-D-mannosaminouronate; Prochlorperazine edisylate	3	1.5934	0	0	0	0	0	0	0	0.199175	0.563352	0.212927	0	0	0	0	0	0	0	0	0	0	0.8479	0	0	0	0	0.141317	0.346154	0.141317	1.5187	0	0	3.1703	1.5859	0	0	0.896414	1.24147	0.46923	0	0
	689	2.4241	403.229	C24H34O3S;	H;	0.818392	Spiroxasone	3	1.1761	0	0	0	0	0	0	0	0.147012	0.415814	0.157163	0	3.0285	0	0	0	0	0.50475	1.23638	0.50475	0	1.6708	4.1729	0	0	0	0.97395	1.70371	0.695538	0	0	0	0	0	0	0	0	0	0	0	0
	690	2.4249	60.0822				Unidentified	4	4.4582	6.123	5.8541	7.2179	6.8738	7.0019	0	0	4.69111	3.02274	1.14249	7.6294	7.517	7.1034	6.185	0	0	4.73913	3.70592	1.51294	6.6785	7.331	6.6074	8.2244	0	0	4.80688	3.76849	1.53848	9.9505	11.1719	10.0785	10.2063	8.1278	9.7269	9.7836	9.86364	0.905623	0.342293	8.6666	7.1519
	691	2.4249	828.07				Isotope	4	4.1254	0	0	0	0	0	0	0	0.515675	1.45855	0.55128	5.069	7.6002	0	0	0	0	2.11153	3.36768	1.37485	0	0	0	0	0	0	0	0	0	12.1663	0	0	0	10.4006	0	0	3.22384	5.5293	2.08988	0	0
	692	2.4251	993.69				Isotope	4	3.4632	0	2.7556	3.2624	3.6724	0	0	0	1.6442	1.77642	0.671424	4.6881	6.4075	4.8066	0	0	0	2.65037	2.96618	1.21094	0	0	0	0	0	0	0	0	0	7.5794	8.0333	8.8197	9.1879	7.1709	8.5919	11.309	8.6703	1.36034	0.51416	8.706	6.8352
	693	2.4253	664.117	C21H27N7O14P2;C20H28N7O9PS;	H;Na_HCOONa;	0.722763	Ribofuranosylnicotinamide Adenine Dinucleotide; Cpad;NAD+; Nicotinamide adenine dinucleotide; Biotinyl-AMP; Novclobiocin	3	0	0	0	0	2.6431	0	0	0	0.330388	0.934477	0.353199	0	1.3464	0	0	0	0	0.2244	0.549665	0.2244	0	0	0	0	0	0	0	0	0	0	0	0	0	0	0	0	0	0	0	0	0
	694	2.4253	850.583				Isotope	4	7.7089	7.3572	7.4457	8.4386	9.2863	7.2019	0	0	5.92983	3.7226	1.40701	6.5855	8.8134	9.6347	7.5887	0	8.0657	6.78133	3.4813	1.42123	8.9827	7.8842	5.876	0	0	0	3.79048	4.27014	1.74328	9.8415	10.9997	12.7915	11.2792	12.1191	12.252	7.4466	10.9614	1.82874	0.691197	0	12.0306
	695	2.4254	463.188	C24H34O4S;C22H28F2O4;C22H31FO4;	Na_Na;HCOONa;HCOOK;	0.734039	Hydroxy-mercaptoandrostenon-acetate-propionate; Diflucortolone; Fluoro-,dihydroxy-methylpregnenedione	3	1.8915	0	0	0	0	0	0	0	0.236437	0.668746	0.252762	0	0	0	0	0	0	0	0	0	0	0	0	0	0	0	0	0	0	0	0	0	0	0	0	0	0	0	0	0	0
	696	2.4254	709.912				Isotope	4	3.638	0	0	0	0	0	0	0	0.45475	1.28623	0.486148	0	0	0	0	0	0	0	0	0	0	1.8627	0	0	0	0	0.31045	0.760444	0.31045	0	0	0	0	11.3769	0	13.9541	3.61871	6.22475	2.35273	11.2582	8.4711
	697	2.4258	490.199	C22H27N7O;C19H33N3O4S;C22H35N3O2;C18H37NO4S;	HCOOK;Na_HCOONa;NaClx2;NaCl_HCOONa;	0.285599	Cypridina luciferin; N-[2-(1-Formyl-2-Methyl-Propyl)-1-(4-Piperidin-1-Yl-but-2-Enoyl)-Pyrrolidin-3-Yl]-Methanesulfonamide; Transcainide; N-palmitoyl taurine	3	0	0	0	0	0	0	0	0	0	0	0	0	1.3943	0	0	0	0	0.232383	0.569221	0.232383	0	0	0	0	0	0	0	0	0	0	0	0	0	0	0	0	0	0	0	0	0
	698	2.426	439.185				Unidentified	4	1.4849	0	0	0	0	0	0	0	0.185613	0.524991	0.198428	0	0	0	0	0	0	0	0	0	0	0	0	0	0	0	0	0	0	0	0	0	0	0	0	0	0	0	0	0	0
	699	2.426	752.225				Unidentified	4	1.6579	0	0	0	0	0	0	0	0.207237	0.586156	0.221546	0	0	0	0	0	0	0	0	0	0	3.282	0	0	0	0	0.547	1.33987	0.547	1.4819	0	0	0	1.3771	0	0	0.408429	0.69818	0.263887	0	0
	700	2.4279	160.095				Unidentified	4	0	0	0	0	2.8143	0	0	0	0.351787	0.995005	0.376077	0	0	0	0	0	0	0	0	0	0	3.7894	0	0	0	0	0.631567	1.54702	0.631567	0	0	0.9303	0	1.3211	0	0	0.321629	0.560751	0.211944	2.5185	0
	701	2.4285	196.135				Unidentified	4	5.48	5.1732	5.3888	6.3603	4.9359	0	0	0	3.41728	2.85922	1.08068	2.2607	0	0	0	0	0	0.376783	0.922927	0.376783	8.5471	7.2171	5.3186	0	0	0	3.5138	3.98362	1.62631	1.3927	0	0	0	1.4824	0	0	0.410729	0.70193	0.265305	4.4859	0
	702	2.4288	729.212				Isotope	4	7.1826	6.7817	0	8.567	8.3373	8.1145	0	8.0716	5.88184	3.67837	1.39029	7.2853	9.3352	8.8971	6.2218	0	0	5.2899	4.24718	1.7339	6.3771	6.9954	8.2573	0	0	0	3.60497	3.99528	1.63107	11.6294	12.1279	0	10.3463	11.4159	8.6579	7.5209	8.81404	4.23102	1.59918	6.1363	10.2206
	703	2.4292	584.147	C26H28FN3O8S;C27H27F2NO6;	Na;HCOOK;	2.1741	Altanserin tartrate; Firategrast	3	0	0	0	0	0	0	0	0	0	0	0	0	0.3247	0	0	0	0	0.0541167	0.132558	0.0541167	0	0	0	0	0	0	0	0	0	0	0	0	0	0	0	0	0	0	0	0	0
	704	2.4293	168.067				Unidentified	4	0	0	3.1056	3.2705	0	0	0	0	0.797013	1.47644	0.558041	4.8416	2.6012	0	0	0	7.4069	2.47495	3.10861	1.26908	0	0	0	0	0	0	0	0	0	3.3281	0	0	3.7749	4.9391	0	0	1.7203	2.19867	0.831018	0	4.0381
	705	2.4306	393.209				Unidentified	4	6.1031	3.6538	3.3818	3.1748	5.0708	0	0	0	2.67304	2.41028	0.910998	0	2.8743	0	0	0	0	0.47905	1.17343	0.47905	3.5247	5.5426	4.8687	7.6525	0	0	3.59808	3.08972	1.26137	2.8513	0	0	0	2.8837	0	0	0.819286	1.39923	0.528858	2.2517	0
	706	2.4312	107.083	C6H12;	Na;	4.48248	Cyclohexane;	3	0	0	0	0	0	0	0	0	0	0	0	0	0	0	0	0	0	0	0	0	0	0	0	0	0	0	0	0	0	0	0	0	0	0	0	0	0	0	0	0	0
	707	2.4338	380.149	C22H21NO5;C18H23N5O2;C18H26ClN3O;C17H27N3O2;	H;K;Na_Na;KCl;	3.05144	Angoline; Methyl-tetramethoxybenzophenanthridine-one; Butyl(Dimethoxy-Benzyl)-Purinylamine; Fenetylline; Hydroxychloroquine; Amino-Cyclohexyl-Hydroxy-Butano-N-(Methylphenyl)Hydrazide	3	0	2.8527	3.2514	4.1135	4.1664	0	0	0	1.798	1.96857	0.744049	0	1.0568	0	0	0	0	0.176133	0.431437	0.176133	6.1898	8.0633	5.7772	0	0	0	3.33838	3.73732	1.52575	3.0482	0	0	2.7392	3.8578	0	0	1.37789	1.75059	0.661661	0	0
	708	2.4346	255.206				Unidentified	4	0	0	0	0	0	0	0	0	0	0	0	0	1.0509	0	0	0	0	0.17515	0.429028	0.17515	0	0	0	0	0.9506	0	0.158433	0.388081	0.158433	0	0	0	0	0	0	0	0	0	0	0	0
	709	2.4346	578.172	C25H33N3O3S2;C23H33NO8;	Na_HCOONa;NaCl_HCOONa;	1.78147	Myxothiazol; Myxothiazol A; Sanfetrinem cilexetil	3	0	0	0	0	0	0	0	0	0	0	0	2.7756	3.3165	0	0	0	0	1.01535	1.58225	0.645949	3.9857	0	0	0	0	0	0.664283	1.62716	0.664283	0	0	0	0	0	0	0	0	0	0	0	0
	710	2.4349	786.169				Unidentified	4	4.3964	5.3171	5.429	6.3011	5.4862	5.8412	0	0	4.09638	2.58439	0.976807	5.5277	6.4327	6.9062	7.4876	7.9022	0	5.7094	2.9174	1.19102	3.8809	4.1131	0	0	0	0	1.33233	2.06535	0.843175	6.1563	6.2431	7.4278	8.4382	6.7216	8.4785	9.2742	7.53424	1.22295	0.462233	6.2646	5.7758
	711	2.4353	706.339				Isotope	4	15.5344	0	0	0	0	0	0	0	1.9418	5.49224	2.07587	0	0	0	0	0	0	0	0	0	10.5863	0	0	0	0	0	1.76438	4.32184	1.76438	0	0	0	0	0	0	0	0	0	0	0	0
	712	2.4355	730.195	C29H39N7O6S;	NaClx2;	3.20462	[ETHANESULFONYLAMINO-(-PROPOXY-1H-INDOLYL)-PROPIONYLAMINO]-PENTANEDIOIC ACID-AMIDE-(CARBAMIMIDOYL-BENZYLAMIDE)	3	0	0	0	0	0	0	0	0	0	0	0	0	0	0	0	0	0	0	0	0	0	0	0	0	0	0	0	0	0	0.4248	0	0	0	0	0	0	0.0606857	0.160559	0.0606857	0	0
	713	2.4358	474.256	C21H42NO7P;C25H32N2O6;C23H31N7;	Na;NH3;HCOONa;	3.37369	Di-Hexanoyloxybutyl-Phosphocholine; lysoPE (16:1); PC(O-13:1); Vindoline; [Trans-(Aminocyclohexyl)Amino]-(Benzyl-Amino)-Cyclopentylpurine;	3	0	3.8684	3.5542	3.7955	0	0	0	0	1.40226	1.9373	0.732231	3.7848	3.2287	4.9922	0	0	0	2.00095	2.26488	0.924635	3.5911	3.0578	0	0	0	0	1.10815	1.725	0.704229	3.8861	5.0112	4.9881	4.153	5.2321	0	0	3.32436	2.32228	0.877739	5.0577	3.6845
	714	2.4362	617.927				Isotope	4	8.7295	8.3743	0	11.4985	13.2542	12.417	0	0	6.78419	5.85787	2.21407	13.8725	16.6344	17.0465	13.4824	10.1696	0	11.8676	6.32287	2.5813	6.9125	7.0312	6.1972	0	0	0	3.35682	3.68826	1.50573	18.2044	21.0998	20.3671	18.6079	19.1498	0	18.8055	16.6049	7.39336	2.79443	16.6233	14.9817
	715	2.4363	480.135	C25H25NO6;C14H26N3O9P;C22H22FN3O2S;C18H27NO6;	Na_Na;HCOONa;HCOONa;NaCl_HCOONa;	3.62396	Oxetorone fumarate; (D-Ribitylamino-Dihydroxypyrimidinyl)-Pentyl-Phosphonic Acid; Altanserin; Rosmarinine	3	0	0	0	0	1.1319	0	0	0	0.141487	0.400187	0.151256	0	0.5637	0	0	0	0	0.09395	0.23013	0.09395	0	0	0	0	0	0	0	0	0	0	0	0	0	0	0	0	0	0	0	0	0
	716	2.4363	733.061				Unidentified	4	1.1657	0	0	0	0	0	0	0	0.145712	0.412137	0.155773	0	2.2015	0	0	0	0	0.366917	0.898759	0.366917	0	0	0	0	0	0	0	0	0	0	0	0	0	3.8034	0	0	0.543343	1.43755	0.543343	0	0
	717	2.4366	456.212	C24H29N3O6;C24H35NO5;C24H26N2O6;C23H31ClO6;C25H33NO4;C22H37NO4S;C26H29NO2;C23H33NO3;	H;K;NH3;NH3;Na_Na;Na_Na;HCOONa;HCOOK;	4.99766	Methylergometrine maleate; Decoquinate; Suxibuzone; 9-Chloro-11beta,17,21-trihydroxypregn-4-ene-3,20-dione 21-acetate; punaglandin 7; Etorphine; N-arachidonoyl taurine; Afimoxifene; Droloxifene; Hydroxytamoxifen; Epostane	3	3.4661	0	3.047	0	3.3045	0	0	0	1.2272	1.69746	0.64158	0	4.4448	0	0	0	0	0.7408	1.81458	0.7408	3.175	0	0	0	0	0	0.529167	1.29619	0.529167	0	0	0	0	0	0	0	0	0	0	0	0
	718	2.4366	603.921	C15H23N5O14P2;C18H23ClN5O7PS;C26H21N3O5S;	Na_Na;HCOOK;NaClx2;	3.26135	(Phosphoribosyl)-AMP; Adenosine diphosphate ribose; ADP-ribose; Phosphoribosyl-AMP; Pradefovir mesylate; Luciferyl sulfate	3	1.1938	0	0	0	0	0	0	0	0.149225	0.422072	0.159528	0	0	0	0	0	0	0	0	0	0	0.6997	0	0	0	0	0.116617	0.285651	0.116617	0	0	0	0	2.2191	0	0	0.317014	0.838741	0.317014	0	0
	719	2.4376	114.088				Unidentified	4	3.826	2.779	0	0	4.1516	0	0	0	1.34458	1.89487	0.716195	0	0	0	0	0	0	0	0	0	6.2502	5.5856	5.0003	0	0	0	2.80602	3.09918	1.26523	0	0	0	0	1.0295	0	0	0.147071	0.389114	0.147071	0	0
	720	2.4378	867.243				Unidentified	4	4.339	4.0368	3.7967	4.0196	4.5448	4.8416	0	0	3.19731	2.00031	0.756045	5.196	7.3674	5.6449	5.6249	0	0	3.9722	3.16579	1.29243	2.9657	0	0	0	0	0	0.494283	1.21074	0.494283	4.4429	4.6626	0	3.7298	5.6133	0	0	2.63551	2.52581	0.954665	0	3.4087
	721	2.4384	562.188	C27H28O12;	NH3;	3.55752	Premithramycin A1	3	3.3679	0	3.2416	3.6537	3.4905	4.6977	0	0	2.30643	1.96015	0.740869	0	2.3937	0	0	0	0	0.39895	0.977224	0.39895	3.5977	4.4461	4.8517	0	0	0	2.14925	2.38892	0.975271	0	0	0	0	0	0	0	0	0	0	0	0
	722	2.4385	548.178				Unidentified	4	0	3.724	2.8182	0	3.671	0	0	0	1.27665	1.78277	0.673825	0	2.4014	0	0	0	0	0.400233	0.980367	0.400233	0	0	0	0	0	0	0	0	0	0	0	0	0	0	0	0	0	0	0	0	0
	723	2.4388	186.078				Unmatched Adduct	4	0	0	0	0	0	0	0	0	0	0	0	2.821	2.4494	0	0	0	0	0.8784	1.36588	0.557616	0	0	0	0	0	0	0	0	0	3.1319	0	0	0	0	0	0	0.447414	1.18375	0.447414	0	0
	724	2.4389	710.059				Isotope	4	3.7193	0	0	0	0	0	0	0	0.464913	1.31497	0.497012	0	6.1836	0	0	0	0	1.0306	2.52444	1.0306	0	0	0	0	0	0	0	0	0	10.9654	0	0	11.4847	12.1736	0	0	4.94624	6.17896	2.33543	0	0
	725	2.4394	305.159				Unidentified	4	4.425	3.6537	3.6621	0	4.2616	4.7496	0	9.2319	3.74799	2.9255	1.10573	0	0	0	0	0	0	0	0	0	3.0385	3.7212	0	0	0	0	1.12662	1.75865	0.717965	1.7141	0	0	0	2.0677	0	0	0.540257	0.928294	0.350862	0	0
	726	2.4395	344.188				Unidentified	4	3.0691	3.7476	3.6038	4.5113	4.0033	0	0	0	2.36689	2.00044	0.756094	5.0038	5.9213	5.8239	0	0	0	2.7915	3.0745	1.25516	0	3.1436	0	0	0	0	0.523933	1.28337	0.523933	4.2292	5.296	0	3.7956	4.4903	0	0	2.54444	2.42156	0.915265	7.0294	5.0257
	727	2.4396	537.096	C23H24Cl2N2O3;C24H24N2O5;	Na_HCOONa;NaClx2;	0.614419	Solabegron; Amtolmetin guacil; Suronacrine maleate	3	0	0	0	2.9763	3.5329	0	0	0	0.81365	1.51391	0.572205	0	0	0	0	0	0	0	0	0	0	4.0256	0	0	0	0	0.670933	1.64344	0.670933	0	0	0	0	0	0	0	0	0	0	2.4582	0
	728	2.4397	341.182	C16H24N2O6;C17H20N6O2;C19H26O4;C16H30O5;C16H21NO6;C17H28O4;C18H24O2;C15H28O3;C16H26O2;	H;H;Na;K;NH3;Na_Na;HCOONa;HCOOK;Na_HCOONa;	4.01558	Pirisudanol; Diamino-[(Dimethoxybenzyl)-Methylamino]Pyrido[2,3-D]Pyrimidine; (Dimethoxy-Benzyl)-Methyl-Pyrido[2,3-D]Pyrimidine-Triamine; Hydroxy-oxa-estrenone acetate; Hydroxy-homo-oxaandrostene-dione; Hydroxytestololactone; Ubiquinone; Hydroxy-hexadecan-dioic acid; Gemcabene; Acremoauxin; Deoxymethynolide; Octadecadiene-diynoic acid; Norandrostenedione; Octadecatriynoic acid; Estra-trien-diol; A…	3	0	0	0	0	0	0	0	0	0	0	0	0	1.0322	0	0	0	0	0.172033	0.421394	0.172033	0	0	0	0	0	0	0	0	0	0	0	0	0	3.0398	0	0	0.434257	1.14894	0.434257	0	0
	729	2.4398	828.238				Isotope	4	2.9632	0	0	0	0	0	0	0	0.3704	1.04765	0.395974	0	6.8502	6.225	0	0	0	2.1792	3.38179	1.38061	0	0	0	0	0	0	0	0	0	0.3493	0	12.0904	12.7626	0	0	0	3.60033	6.03389	2.2806	13.5609	9.1431
	730	2.4401	494.144	C23H28ClN3O5S;C24H26FN3O4S;C22H34INO2;C24H29N3O4S;C18H34NO10P;C20H25N3O6;C25H25NO4;	H;Na;Na;K;K;Na_HCOONa;Na_HCOONa;	4.41159	Glibenclamide; Glyburide; 4-(2-HYDROXYBENZYLAMINO)-N-(3-(4-FLUOROPHENOXY)PHENYL)PIPERIDINE-1-SULFONAMIDE; Oxapium iodide; Morpholine-4-Carboxylic Acid [1-(2-Benzylsulfanyl-1-Formyl-Ethylcarbamoyl)-2-Phenyl-Ethyl]-Amide; PS(12:0); Myxochelin B; (S)-3-(4-(2-Carbazol-9-Yl-Ethoxy)-Phenyl)-2-Ethoxy-Propionic Acid	3	0	0	0	0	0	0	0	0	0	0	0	0	2.6589	0	0	0	0	0.44315	1.08549	0.44315	0	0	0	0	0	0	0	0	0	0	0	0	0	1.245	0	0	0.177857	0.470566	0.177857	0	0
	731	2.4407	868.861	C40H40N4O14;	HCOONa;	2.51942	Heptacarboxylporphyrin III	3	0	0	0	0	0	0	0	0	0	0	0	0	0	2.317	0	0	0	0.386167	0.945911	0.386167	0	0	2.1826	0	0	0	0.363767	0.891043	0.363767	0	2.9065	0	0	0	0	0	0.415214	1.09855	0.415214	0	0
	732	2.4408	159.049				Unidentified	4	1.8647	0	0	0	0	0	0	0	0.233088	0.659271	0.249181	0	0	0	0	0	0	0	0	0	0	2.997	0	0	0	0	0.4995	1.22352	0.4995	0	0	0	0	0	0	0	0	0	0	0	0
	733	2.4412	729.069				Multiply Charged ion - not identified	4	4.3333	0	0	0	0	0	0	0	0.541663	1.53205	0.579062	0	0	0	5.7204	0	0	0.9534	2.33534	0.9534	6.52	0	0	0	0	0	1.08667	2.66178	1.08667	0	0	0	0	0	0	0	0	0	0	0	0
	734	2.4416	358.199	C21H27NO4;C21H24O4;	H;NH3;	0.335007	Laudanosine; Nalbuphine; Hydroxy-dioxopregna-dienoic acid, gamma-lactone; Bisphenol A diglycidyl ether	3	4.0112	2.7304	3.7574	3.7607	3.0497	0	0	0	2.16368	1.83826	0.694798	3.8628	6.1068	4.0062	0	0	0	2.3293	2.67245	1.09102	0	0	0	0	0	0	0	0	0	4.2474	5.1259	4.5168	3.9808	4.2038	0	0	3.15353	2.18412	0.825519	7.1612	5.9762
	735	2.4419	408.062	C16H17N3O5S;C12H19N3O7S;C20H15NO5;C12H19N3O3S2;	Na_Na;NaCl;NaCl;Na_HCOONa;	4.21505	Cefadroxil; S-(Formylmethyl)glutathione; S-acetylglutathione; 10-Hydroxydihydrosanguinarine; 4-Sulfonamide-[4-(Thiomethylaminobutane)]Benzamide	3	0	0	0	0	0	0	0	0	0	0	0	0	0.4475	0	0	0	0	0.0745833	0.182691	0.0745833	0	0	0	0	0	0	0	0	0	0	0	0	0	0	0	0	0	0	0	0	0
	736	2.4425	102.091				Unidentified	4	1.6682	0	0	0	2.9599	0	0	0	0.578512	1.12545	0.425381	0	1.8992	0	0	0	0	0.316533	0.775345	0.316533	0	3.4729	0	0	0	0	0.578817	1.41781	0.578817	0	0	0	0	1.1532	0	0	0.164743	0.435869	0.164743	0	0
	737	2.4427	246.17	C12H23NO4;C13H19N5;C12H20O4;	H;H;NH3;	1.70614	Methylbutyroylcarnitine; Isovalerylcarnitine; Pinacidil; Dodecenedioic acid; Dioxo-dodecanoic acid; Traumatic acid	3	78.634	64.4328	59.765	69.791	84.3537	90.8422	69.2828	72.7953	73.7371	10.3328	3.90543	39.9724	60.2182	71.5425	48.4243	52.4354	43.4283	52.6702	11.6436	4.75347	94.943	113.75	104.669	98.3502	107.676	87.4649	101.142	9.45919	3.8617	55.4416	72.0663	68.5722	31.9347	58.3828	39.8132	30.6445	50.9793	16.9793	6.41757	35.2465	32.9136
	738	2.4431	223.109	C8H18N2O3S;C11H20O2;	H;K;	2.33069	Butyl-homocysteine-sulfoximine; Undecanolactone; Dimethyl-nonenoic acid; hendecenoic acid; undecenoic acid; Ethyl-methyl-octenoic acid; Hendecenoic acid; Citronellyl formate; gamma-Undecalactone; Undecylenic acid	3	0	0	0	0	0	0	0	0	0	0	0	0	0.6578	0	0	0	0	0.109633	0.268546	0.109633	0	0	0	0	0	0	0	0	0	0	0	0	0	0	0	0	0	0	0	0	0
	739	2.4452	589.28	C24H40N8O4;C28H46O5;	HCOOK;NaCl_HCOONa;	1.15394	Dipyridamole; 3alpha,7alpha,12alpha-Trihydroxy-24-methyl-5beta-cholest-23-en-26-oic acid	3	0	2.5846	0	2.6475	3.0203	0	0	0	1.03155	1.42923	0.540198	3.8254	2.6646	0	0	0	0	1.08167	1.71545	0.700328	0	0	0	0	0	0	0	0	0	4.2915	4.4819	5.2231	5.5724	4.9032	0	0	3.49601	2.42636	0.917078	4.5749	4.7615
	740	2.4462	193.11				Unidentified	4	0	0	0	0	0	0	0	0	0	0	0	0	0	0	0	0	0	0	0	0	0	0	0	0	0	0	0	0	0	1.3687	0	0	0	1.1728	0	0	0.363071	0.622636	0.235334	0	0
	741	2.4462	477.182	C24H32ClFO5;C24H31FO5;C24H34O4S;	Na;NaCl;NaCl;	4.317	Halcinonide; Descinolone acetonide; Fluorometholone 17-acetate; Fluorometholone acetate (USAN); 17beta-Hydroxy-4-mercaptoandrost-4-en-3-one 4-acetate 17-propionate	3	1.8794	0	0	0	0	0	0	0	0.234925	0.664468	0.251145	0	1.7329	0	0	0	0	0.288817	0.707453	0.288817	0	0	0	0	0	0	0	0	0	0	0	0	0	0	0	0	0	0	0	0	0
	742	2.4463	637.216	C36H38O8;C29H38ClFO8;	K;HCOONa;	0.141239	Tinyatoxin; Formocortal	3	0	0	0	0	1.0928	0	0	0	0.1366	0.386363	0.146032	0	1.0269	0	0	0	0	0.17115	0.41923	0.17115	0	0	0	0	0	0	0	0	0	0	0	0	0	0	0	0	0	0	0	0	0
	743	2.4465	595.178	C26H36O13;C27H34F6O3;C26H36N2O9;C25H34O11;C22H30Cl2N10;C27H36F2O5;	K;KCl;KCl;HCOOK;Na_HCOONa;NaClx2;	0.873686	Hydroxyiridodial glucoside pentaacetate; Epi-Hydroxyiridodial glucoside pentaacetate; Hexafluoro-dihydroxy-tetradehydrovitamin D3; Quinidine gluconate; Gibberellin-glucoside; Chlorhexidine; Diflucortolone pivalate; Diflucortolone valerate	3	0	0	0	0	1.5136	0	0	0	0.1892	0.535138	0.202263	0	1.3033	0	0	0	0	0.217217	0.53207	0.217217	0	0	0	0	0	0	0	0	0	0	0	0	0	0	0	0	0	0	0	0	0
	744	2.4469	460.243	C20H40NO7P;C27H35NO4;C24H39NO5;C25H37NO4;C21H39NO6;C26H33NO2;	Na;Na;K;Na_Na;NaCl;HCOONa;	1.19502	PC(O-10:1/2:0); Levonantradol; Nantradol;Talatizamine; Bimatoprost; Salmeterol; Myriocin; Sphingofungin F; [(Benzylamino)methyl]estra-triene-diol; abiraterone acetate; Fenretinide	3	3.5468	3.6613	0	5.2963	5.867	4.7926	0	0	2.8955	2.51723	0.951423	4.7875	4.9616	4.1107	0	0	0	2.30997	2.54636	1.03955	3.954	4.569	0	0	0	0	1.4205	2.20921	0.901905	4.257	5.8269	0	4.9893	4.2729	0	0	2.76373	2.63813	0.997118	5.4431	4.2245
	745	2.4487	354.086	C11H17N5O5S;C16H17N3O4;C16H16F3NO;C18H17NO3;C15H21NO4;C15H15N3O2;C14H20ClNO2;	Na;K;NaCl;NaCl;KCl;HCOOK;HCOOK;	4.06681	Adrenochrome monoaminoguanidine mesilate; Anthramycin; Seproxetine; Mecambroline; Indobufen; Japonine; Mecambrine; Pukateine; Xylopine; Metalaxyl; Salcaprozate; Tacedinaline; Acetochlor; Alachlor	3	0	0	0	0	0	0	0	0	0	0	0	0	0	0	0	0	0	0	0	0	0	0	0	0	0	0	0	0	0	0	0	0	0	0	0	0	0	0	0	0	0
	746	2.4487	670.219	C33H35N3O7;	HCOOK;	4.13298	RU85053	3	0.7232	0	0	0	0	0	0	0	0.0904	0.25569	0.0966417	0	0	0	0	0	0	0	0	0	0	0	0	0	0	0	0	0	0	0.8733	0	0	0	1.4685	0	0	0.334543	0.596617	0.2255	0	0
	747	2.4489	407.187	C26H28N2;C20H30N2O4;	K;Na_Na;	3.46275	Cinnarizine; Calpeptin	3	0	0	0	0	0	0	0	0	0	0	0	0	0	0	0	0	0	0	0	0	0	0	0	0	0	0	0	0	0	0	0	0	0	0	0	0	0	0	0	0	0
	748	2.4491	375.219				Unidentified	4	0	0	0	0	1.1253	0	0	0	0.140662	0.397854	0.150375	0	1.4861	0	0	0	0	0.247683	0.606698	0.247683	0	0	0	0	0	0	0	0	0	0	0	0	0	0	0	0	0	0	0	0	0
	749	2.4495	243.177	C8H22N4;	HCOONa;	3.45426	1-Guanidinium-7-Aminoheptane	3	3.4913	4.2794	4.2972	5.382	6.2199	0	0	0	2.95872	2.57984	0.975088	2.9991	5.2174	0	0	0	0	1.36942	2.23446	0.912214	6.203	9.1826	7.4896	0	0	0	3.81253	4.28203	1.74813	5.671	7.0959	0	3.5928	6.5513	0	0	3.273	3.24941	1.22816	5.7403	3.3809
	750	2.4495	485.238	C31H48O4;C29H50O4;C28H48O2;	H;Na;HCOONa;	2.03972	Trihydroxy-dimethyl-tetradehydro-dihomovitamin D3; Trihydroxy-dimethyl-tetradehydro-dihomo-epivitamin D3; Dihydroxy-methoxy-dimethyl-tetradehydro-homovitamin D3; Trihydroxy-dimethyl-tetradehydro-dihomovitamin D3; Dihydroxy-ethoxy-dimethyl-tetradehydro-epivitamin D3; Hydroxyprevitamin D3 diacetate; Testosterone ketolaurate; (Hydroxypropyl)-dihydroxy-norvitamin D3; Hydroxy-campestanone; Hydroxy-cam…	3	0	0	0	0	1.2985	0	0	0	0.162312	0.459089	0.173519	0	0	0	0	0	0	0	0	0	0	0	0	0	0	0	0	0	0	0	0	0	0	0	0	0	0	0	0	0	0
	751	2.4495	599.39	C31H51NO9;	NH3;	4.85491	Rosaramicin	3	7.0147	6.0151	5.4056	5.4229	6.2493	5.071	0	0	4.39732	2.77985	1.05068	4.271	5.7008	5.3335	0	0	0	2.55088	2.83354	1.15679	5.7439	6.8411	0	0	0	0	2.0975	3.2679	1.33412	3.4997	5.2386	5.0909	4.3237	5.0505	0	0	3.31477	2.34151	0.885008	4.3475	3.735
	752	2.4501	227.086	C5H12N6O3;	Na;	0.440361	Dimethylenetriurea	3	56.4681	54.5064	57.0652	59.1851	55.4449	56.0536	61.2599	61.1485	57.6415	2.58177	0.975819	64.2287	59.2076	63.2174	64.3079	76.3025	77.651	67.4859	7.59633	3.10119	47.9253	36.2937	36.9615	48.4117	59.8169	52.655	47.0107	9.10491	3.71706	20.9974	24.239	24.0964	24.7469	26.1321	20.945	23.6988	23.5508	1.92341	0.72698	34.7503	45.5876
	753	2.4517	931.775				Multiply Charged ion - not identified	4	0	0	0	0	0	0	0	0	0	0	0	0	0	0	0	0	0	0	0	0	0	0	0	0	0	0	0	0	0	0	0	0	0	0.4353	0	0	0.0621857	0.164528	0.0621857	0	0
	754	2.4519	214.073				Unidentified	4	0	0	0.7264	0	0	0	0	0	0.0908	0.256821	0.0970693	0	0	0	0	0	0	0	0	0	0	1.3901	0	0	0	0	0.231683	0.567506	0.231683	0.6827	0	0	0	3.8804	0	0	0.651871	1.4462	0.546614	0	0
	755	2.4519	331.195	C20H26O4;	H;	1.14738	Carnosol; Dicyclohexyl phthalate; GA15 (closed lactone form); Gibberellin A15	3	0	0	0	0	0.8551	0	0	0	0.106887	0.302324	0.114268	0	0	0	0	0	0	0	0	0	0	0	0	0	0	0	0	0	0	0	0	0	0	0	0	0	0	0	0	0	0
	756	2.4522	357.228	C19H32O6;C20H28N4O2;C20H25N3O2;	H;H;NH3;	3.19124	Methyl-dihydroperoxy-octadecatrienoate; Methyl-epidioxy-hydroperoxy-octadecadienoate; Methyl-dihydroperoxy-octadecatrienoate; Methyl-(epidioxy-ethyl-cyclopentyl)-hydroperoxy-undecenoate; Methyl-epdioxy-hydroperoxy-octadecadienoate; Methyl -dihydroperoxy-octadecatrienoate; methyl-epidioxy-hydroperoxy-octadecadienoate; Methyl-dihydroperoxy-octadecatrienoate; Methyl-hydroperoxy-epidioxy-octadecadien…	3	1.0349	0	0	2.8415	2.4824	0	0	0	0.79485	1.21026	0.457436	3.2663	3.2987	0	0	0	0	1.09417	1.69511	0.692024	0	0	0	0	0	0	0	0	0	3.4736	4.6451	4.1811	3.3899	4.0386	0	0	2.81833	1.97169	0.745228	4.7478	3.5814
	757	2.4526	542.198				Unidentified	4	0	0	0.644	0	0	0	0	0	0.0805	0.227688	0.0860581	0	0	0	0	0	0	0	0	0	0	0	0	0	0	0	0	0	0	0	0	0	0	0	0	0	0	0	0	0	0
	758	2.4539	613.158	C20H32N6O12S2;C24H32O12S;C25H36O10;C18H30N8O6S;C18H34N2O13;	H;HCOONa;NaClx2;NaCl_HCOONa;NaCl_HCOONa;	3.89786	Glutathione disulfide; Oxidized glutathione; Oxiglutatione; Estriol 3-sulfate 16-glucuronide; Glaucarubin; Atrazine Glutathione Conjugate; Glucosylgalactosyl hydroxylysine	3	0	1.5959	0	0	1.9813	0	0	0	0.44715	0.834343	0.315352	0	0	0	0	0	0	0	0	0	3.699	0	0	0	0	0	0.6165	1.51011	0.6165	0	0	0	0	0	0	0	0	0	0	0	0
	759	2.4543	84.0453				Unidentified	4	0	0	0	3.0831	3.254	0	0	0	0.792137	1.46746	0.554649	2.3843	0	0	0	0	0	0.397383	0.973386	0.397383	4.3276	4.1537	0	0	0	0	1.41355	2.19055	0.894289	0	0	0	0	2.8808	0	0	0.411543	1.08884	0.411543	2.4542	2.415
	760	2.4543	172.062				Unidentified	4	0.5678	0	0.7129	0	2.1165	0	0	0	0.42465	0.743311	0.280945	2.9738	0	0	0	0	0	0.495633	1.21405	0.495633	0	0	0	0	0	0	0	0	0	0.5041	0	0	0	0	0	0	0.0720143	0.190532	0.0720143	0	2.7689
	761	2.4551	84.0774				Unidentified	4	2.7412	2.919	0	3.339	3.2942	0	0	0	1.53668	1.65376	0.625062	0	2.9596	0	0	0	0	0.493267	1.20825	0.493267	6.0115	3.5359	4.6372	0	0	0	2.3641	2.70594	1.1047	2.7332	0	0	0	0	0	0	0.390457	1.03305	0.390457	3.3305	0
	762	2.4552	464.166	C19H27N5O5;C21H27NO5;C22H23N5O;	NaCl;Na_HCOONa;Na_HCOONa;	2.60683	Nifekalant; Hasubanonine; Motesanib	3	9.97	8.8343	8.2395	10.6506	11.7967	11.6148	9.1066	0	8.77656	3.77098	1.4253	0	2.8012	0	0	0	0	0.466867	1.14359	0.466867	16.5058	14.5133	11.9118	12.5592	12.9856	0	11.4126	5.82822	2.37936	3.4088	0	0	0	4.5552	0	6.0103	1.99633	2.60116	0.983146	4.0205	3.0181
	763	2.4553	373.21	C14H30NO7P;C21H25NO4;C22H32O2;C18H34O4;C18H28N2O2;	NH3;NH3;Na_Na;NaCl;HCOONa;	2.11677	PC(6:0); PC(O-4:0/2:0); Argemonine; Glaucine; Nalmexone; Tetrahydropalmatine; Xylopinine; Docosahexaenoic acid; Docosatriynoic acid; Methylpregnene-dione; Methylprogesterone; Docosa-Hexaenoic Acid; Promestriene; Retinol Acetate; Dihydroxyoctadecenoic acid; DHOME; hydroxy-epoxy-stearic acid; epoxy-hydroxystearate; RU 5135	3	3.4578	3.6334	3.2536	4.525	4.5126	0	0	0	2.4228	2.05716	0.777534	3.6065	5.0311	0	0	0	0	1.4396	2.27526	0.928872	3.3934	0	0	0	0	0	0.565567	1.38535	0.565567	4.0055	5.0162	0	3.4916	4.9544	0	0	2.49539	2.39287	0.90442	4.3415	4.5774
	764	2.4571	993.487				Isotope	4	0	0	0	0	0	0	0	0	0	0	0	0	6.4154	0	0	0	0	1.06923	2.61908	1.06923	0	0	0	0	0	0	0	0	0	0	0	0	9.6768	7.7457	0	0	2.48893	4.28705	1.62035	0	8.2947
	765	2.4572	359.208				Unidentified	4	0	0	0.4748	0	2.3178	0	0	0	0.349075	0.81265	0.307153	0	1.9068	0	0	0	0	0.3178	0.778448	0.3178	0	3.1121	0	0	0	0	0.518683	1.27051	0.518683	0	0	0	0	0	0	0	0	0	0	0	0
	766	2.458	267.08	C10H14N4O2;C10H14O4;C8H16O4;	Na_Na;HCOONa;Na_HCOONa;	0.861157	IBMX; Morinamide; (dimethoxylphenyl)ethane-diol; Dihydroxymint lactone; Dihydroxy-dihydro-cumate; Guaifenesin; Dihydroxy-octanoic acid; Cladinose	3	14.3715	13.0673	13.4446	9.5331	14.7342	11.0647	9.3979	8.4573	11.7588	2.45364	0.92739	10.5062	15.3265	17.0453	12.4383	11.5527	13.045	13.319	2.44122	0.996623	4.147	7.5706	8.2494	0	0	0	3.32783	3.90173	1.59287	4.5896	5.3548	5.3682	0	5.629	0	0	2.99166	2.81636	1.06449	5.8762	5.7223
	767	2.4584	478.187	C21H30Cl2N2O5;C22H35NO3;	NH3;NaClx2;	1.04562	Dexloxiglumide; Loxiglumide; N-arachidonoyl glycine	3	1.3382	0	0	0	0	0	0	0	0.167275	0.473125	0.178824	0	0	0	0	0	0	0	0	0	0	0	0	0	0	0	0	0	0	0	0	0	0	0	0	0	0	0	0	0	0
	768	2.4591	370.167	C14H28NO8P;C21H23NO5;C19H25NO5;C17H25N5O2;C21H20O5;C18H23NO3;	H;H;Na;K;NH3;HCOONa;	4.24136	PC(6:0); Homochelidonine; Allocryptopine; Diamorphine; Fumaricine; Heroin; Disubstituted cyclohexenone; Prizidilol; (Dimethylallyl)-methylgalangin; xanthohumol C; Butopamine; Dihydrocodeine; Dobutamine; Isoxsuprine; Ractopamine	3	0	0.5362	0	0	0.8178	0	0	0	0.16925	0.3223	0.121818	0	0	0	0	0	0	0	0	0	0	0	0	0	0	0	0	0	0	0	0	0	0	0	0	0	0	0	0	0	0
	769	2.4609	402.217				Unidentified	4	2.4983	3.2655	0	0	2.8816	0	0	0	1.08068	1.5055	0.569026	0	0	0	0	0	0	0	0	0	0	0.804	0	0	0	0	0.134	0.328232	0.134	0	0	0	0	1.8411	0	0	0.263014	0.69587	0.263014	0	0
	770	2.4613	439.106	C18H24N2O5S;C16H29O7P;C23H24O4;C19H22N4O;	NaCl;KCl;KCl;NaClx2;	1.32087	Amosulalol; Juvenile hormone III diol phosphate; Bisphenol A dimethacrylate; Cyclofenil; Aminacrine	3	4.8196	3.9127	3.2761	4.6259	4.4211	0	0	0	2.63192	2.22965	0.842729	4.1577	4.3655	4.6578	0	0	8.7479	3.65482	3.29905	1.34683	4.092	0	0	0	0	0	0.682	1.67055	0.682	5.5702	5.783	6.0341	5.5735	4.2988	0	5.634	4.69909	2.14462	0.810589	4.614	4.9714
	771	2.4619	187.099	C8H12O4			2-Octenedioic acid adduct	2	7.6542	6.0622	6.288	6.6422	8.4959	8.2116	7.1977	9.9158	7.55845	1.29251	0.488524	4.4346	5.999	5.3652	0	8.9243	0	4.12052	3.52733	1.44003	8.7715	10.4287	9.5361	0	13.1292	0	6.97758	5.60161	2.28685	4.6291	5.6061	6.1256	3.1595	5.3952	0	0	3.55936	2.60728	0.985458	3.1968	3.4759
	772	2.4619	394.134	C20H16N4O2S;C16H21N3O3;C15H25NO3;	NH3;Na_HCOONa;NaCl_HCOONa;	4.94755	Indiplon; N(6)-[(Indol-3-yl)acetyl]-L-lysine; Butoxamine; Metoprolol	3	0	0	0	4.4759	3.3626	0	0	0	0.979812	1.8385	0.694887	2.3722	3.9294	0	0	0	0	1.05027	1.69995	0.694002	3.5595	5.3094	5.1845	0	0	0	2.34223	2.63903	1.07738	3.9816	0	0	3.0459	3.8911	0	0	1.5598	1.9681	0.743871	2.3322	2.4134
	773	2.4621	452.137	C19H27NO8S;C26H21N3O2;C21H24F3N3S;C22H23N3O4;C19H28ClN5O;C14H25NO11;C17H32BrNO2;	Na;Na_Na;Na_Na;NaCl;KCl;HCOONa;Na_HCOONa;	1.87996	N-Methylscopolamine methylsulfate; Renilla luciferin; Trifluoperazine; Erlotinib; Etoperidone; 1-D-myo-inosityl-2-acetamido-2-deoxy-alpha-D-glucopyranoside; Beta-1,4-mannose-N-acetylglucosamine; beta-D-Gal-1-3-D-GlcNAc;beta-D-Galactopyranosyl-(1->3)-N-acetyl-D-galactosamine; beta-D-galactosyl-1,4-N-acetyl-beta-D-glucosamine; D-Galactosyl-3-N-acetyl-beta-D-galactosamine; Lacto-N-biose; Lacto-N-bio…	3	0	2.6638	0	2.9613	2.8027	0	0	0	1.05347	1.45611	0.550358	3.6724	0	0	0	0	0	0.612067	1.49925	0.612067	0	3.2367	0	0	0	0	0.53945	1.32138	0.53945	3.2357	0	0	5.5458	6.2458	0	0	2.14676	2.82771	1.06877	4.3047	5.2814
	774	2.4622	508.161	C25H27N3O5;C23H31Cl2NO3;C22H26ClN7;C22H33NO5;C23H29N5O;	NaCl;HCOONa;HCOOK;NaClx2;NaClx2;	1.47591	Cp-Coeleneterazine; Estramustine; 4-{2-[4-(2-Aminoethyl)Piperazin-1-Yl]Pyridin-4-Yl}-N-(3-Chloro-4-Methylphenyl)Pyrimidin-2-Amine; Heteratisine; Toquizine	3	8.2341	8.0505	6.9212	6.4877	6.7517	5.3312	7.2404	0	6.1271	2.63775	0.996974	12.184	14.3715	11.0034	9.6773	0	0	7.8727	6.29028	2.568	0	0	0	0	0	0	0	0	0	11.4241	9.3287	10.9277	20.1791	17.3293	0	13.3961	11.7979	6.44954	2.4377	11.1802	14.2843
	775	2.4639	904.599	C43H78N6O13;C47H92NO8P;C48H86NO8P;C46H88NO8P;	NH3;KCl;HCOONa;Na_HCOONa;	3.32744	Romurtide; PC(39:1); PE(42:1); PC (40:5); PC(38:2)	3	0	0	0	0	0	0	0	0	0	0	0	0	0	0	0	0	0	0	0	0	0	0	0	0	0	0	0	0	0	0	0	0	0	0	0	0	0	0	0	0	0
	776	2.4644	161.102	C6H16N2;	Na_Na;	2.48289	diaminohexane	3	0	0	0	0	0	0	0	0	0	0	0	0	0	0	0	0	0	0	0	0	3.277	0	0	0	0	0	0.546167	1.33783	0.546167	0	0	0	0	0	0	0	0	0	0	0	0
	777	2.4644	404.115	C20H21NO6S;C14H23NO11;C12H22N2O8S2;C20H24ClNO2;	H;Na;NH3;NaCl;	1.78167	R-2-{[4'-Methoxy-(1,1'-Biphenyl)-4-Yl]-Sulfonyl}-Amino-6-Methoxy-Hex-4-Ynoic Acid; N-Acetyl-9-O-lactoylneuraminic acid; Piposulfan; Methopholine	3	0	0.701	0	0	1.1427	0	0	0	0.230463	0.442761	0.167348	0	0	0	0	0	0	0	0	0	0	0	0	0	0	0	0	0	0	4.8241	0	0	0	3.3887	0	0	1.17326	2.04611	0.773359	0	0
	778	2.4647	549.074	C17H28N4O8P2S;C24H28Cl3FO4;C20H24N4O5S;C20H22O10;	K;Na_Na;NaClx2;NaCl_HCOONa;	1.93053	Methyl-hydroxybutyl-ThPP; Triclonide; (Naphthylsulfonylglycyl)-Amidino-Phenylalanine-Isopropylester; Catechin-xyloside; Plicatic acid	3	0	1.9433	0	0	1.5932	0	0	0	0.442063	0.823871	0.311394	0	0	0	0	0	0	0	0	0	0	0	0	0	0	0	0	0	0	0	0	0	0	0	0	0	0	0	0	0	0
	779	2.4657	551.166	C18H31FO15;C19H30N4O10S;C27H28N2O5S;C22H26O12;C23H22N4O8;C24H31FO6;C27H31ClN2O;	Na_Na;Na_Na;NaCl;HCOONa;HCOONa;NaClx2;NaClx2;	2.99381	Deoxy-2-Fluoro-B-D-Cellotrioside;;Ranitidine citrate; (2-Sulfanyl-3-Phenylpropanoyl)-Phe-Tyr; Catalposide; (10r)-10-Formyl-5,8,10-Trideazafolic Acid; 10-Formyl-5,8,10-Trideazafolic Acid; 9alpha-Fluoro-6alpha-methylprednisolone 21-acetate; Betamethasone acetate; Dexamethasone 21-acetate; Dexamethasone acetate anhydrous; Flunisolide; Fluperolone acetate; Paramethasone acetate; Triamcinolone acetoni…	3	0	0	1.7056	0	5.0649	0	0	0	0.846313	1.80603	0.682617	0	0.4189	0	0	0	0	0.0698167	0.171015	0.0698167	0	0	0	0	0	0	0	0	0	0	0	0	0	3.6654	0	0	0.523629	1.38539	0.523629	2.1896	0
	780	2.4658	231.091	C10H20O;	KCl;	3.24546	Citronellol; Menthol; Neomenthol; Dimethyl-Octenol; Decenol; methyl-nonenol; Decanal	3	0	0	0	0	0	0	0	0	0	0	0	0	0	0	0	0	0	0	0	0	0	0	0	0	0	0	0	0	0	0	0	0	2.7118	0	0	0	0.3874	1.02496	0.3874	3.1642	2.8065
	781	2.466	172.137				Unidentified	4	0	0	0	0	0	0	0	0	0	0	0	0	0.6853	0	0	0	0	0.114217	0.279773	0.114217	0	3.0569	0	0	0	0	0.509483	1.24797	0.509483	0	0	0	0	0	0	0	0	0	0	0	0
	782	2.4661	343.201	C20H26N2O3;C20H23NO3;C21H30O;C17H32O3;C17H26N2O;	H;NH3;Na_Na;NaCl;HCOONa;	3.4965	Compound IV; Benalaxyl; Methyl-nor-pregnatrienol; (Dihydroxycyclopentyl)-dodecanone; Oxo-heptadecanoic acid; Methoxy-hexadecenoic acid; Keto heptadecylic acid; Palmoxirate; Methoxy-diisopropyltryptamine; Obscurine; Ropivacaine; Sauroxine	3	0	0	0.766	0	2.7885	0	0	0	0.444312	0.984391	0.372065	2.5346	3.4124	0	0	0	0	0.991167	1.5604	0.63703	0	1.1203	0	0	0	0	0.186717	0.457361	0.186717	3.4661	0	0	0	3.6447	0	0	1.01583	1.73562	0.656004	4.8514	3.7371
	783	2.4667	566.197	C20H37N3O13;C23H33N5O8;	K;NaCl;	4.60969	Destomysin; Roxifiban acetate	3	0	1.577	1.7312	0	0	0	0	0	0.413525	0.766808	0.289826	0	0	0	0	0	0	0	0	0	3.4605	3.1276	0	0	0	0	1.09802	1.70429	0.695775	0	0	0	0	0	0	0	0	0	0	0	0
	784	2.467	385.237	C18H29N3O5;	NH3;	4.25705	Bambuterol	3	3.1753	2.9345	2.9619	3.9411	3.8527	0	0	0	2.10819	1.78432	0.67441	3.4054	4.3986	0	0	0	0	1.30067	2.03932	0.832547	3.424	3.474	0	0	0	0	1.14967	1.78113	0.727142	4.5186	0	5.007	4.8029	5.1711	0	0	2.78566	2.61332	0.987743	3.9278	4.6314
	785	2.4673	592.258	C26H34N6O7S;C26H48NO7P;	NH3;KCl;	1.5365	Avitriptan fumarate; lysoPC (18:3); PC(18:3)	3	0	0.4641	1.6033	0	0	0	0	0	0.258425	0.56716	0.214366	0	0	0	0	0	0	0	0	0	0	0	0	0	0	0	0	0	0	0	0	0	0	0	0	0	0	0	0	0	0
	786	2.4674	508.006	C22H18Cl2FNO3;	KCl;	3.32673	Cyfluthrin	3	2.7926	0	2.9072	0	0	0	0	0	0.712475	1.3196	0.498763	0	0	0	0	0	0	0	0	0	5.4989	0	0	0	0	0	0.916483	2.24492	0.916483	0	0	0	0	4.157	0	0	0.593857	1.5712	0.593857	3.7831	0
	787	2.4674	850.416				Multiply Charged ion - not identified	4	5.0444	0	0	0	0	0	0	0	0.63055	1.78346	0.674086	0	6.8223	0	0	0	0	1.13705	2.78519	1.13705	0	0	0	0	0	0	0	0	0	0	0	0	0	8.3898	0	0	1.19854	3.17105	1.19854	0	0
	788	2.4675	590.236	C26H44NO9P;C34H35N5O2;C25H42NO7P;C27H43N3O4;C26H41NO6;	Na_Na;Na_Na;Na_HCOONa;NaClx2;NaCl_HCOONa;	4.87929	PS(20:4); [4-({[5-Benzyloxy-1-(3-Carbamimidoyl-Benzyl)-1h-Indole-2-Carbonyl]-Amino}-Methyl)-Phenyl]-Trimethyl-Ammonium; LysoPE(20:5); Taltobulin; Edifolone acetate	3	0	0.5967	2.4839	0	1.4553	0	0	0	0.566988	0.931352	0.352018	0	0	0	0	0	0	0	0	0	0	0	0	0	0	0	0	0	0	0	0	0	0	0.417	0	0	0.0595714	0.157611	0.0595714	0	0
	789	2.4682	499.154	C25H27ClN4O3S;C22H30O10;C28H28N2O2;C21H28O8;C16H28N4O6;	H;Na_Na;KCl;Na_HCOONa;NaCl_HCOONa;	0.0200339	Chloro-Naphthalene-Sulfonyl-Piperazinyl-Tetrahydro-2h-Bipyridinylyl)-Methanone; alpha-CEHC-glucuronide; Difenoxin; Vernoflexuoside; (Ac)2-L-Lys-D-Ala-D-Ala	3	0	0	0	0	0	0	0	0	0	0	0	0	0	0	0	0	0	0	0	0	4.7471	4.1894	4.682	0	0	0	2.26975	2.49386	1.01811	1.0893	0	0	0	0.9312	0	0	0.288643	0.49506	0.187115	0	0
	790	2.4684	525.288	C20H37N5O10;C31H46O2;	NH3;KCl;	1.97986	Versetamide; Phylloquinone	3	0	0	0	0	0	0	0	0	0	0	0	0	0	0	0	0	0	0	0	0	0	3.0529	0	0	0	0	0.508817	1.24634	0.508817	0	0	0	0	0	0	0	0	0	0	0	0
	791	2.4688	569.269	C24H46O11;	NaCl;	3.33762	Dodecyl-Alpha-D-Maltoside	3	0	0	0	0	0	0	0	0	0	0	0	0	2.843	0	0	0	0	0.473833	1.16065	0.473833	0	0	0	0	0	0	0	0	0	0	0	0	3.3812	0	0	0	0.483029	1.27797	0.483029	0	2.8042
	792	2.4694	371.198	C24H28O2;C21H29FO3;C21H32O3;C20H30O;	Na;Na;K;HCOOK;	2.99031	Tetracosapentaynoic acid; Arotinoid acid; Bexarotene; bixin aldehyde; Bixindial; Fluoro-hydroxypregnenedione; Fluoro-hydroxyandrostenone acetate; Fluoro-hydroxy-dimethylandrostenedione; Dihydroxy-hexanorvitamin D3; Dihydroxy-dimethylandrostenone; Hydroxy-pregnanedione; Hydroxypregnenolone; Dihydroxypregnenone; Carbomethoxyandrostenol; Hydroxypregnenolone; Dihydroxycholestanate; Dihydrodeoxycortic…	3	2.952	2.9539	3.2404	3.7225	3.7196	0	0	0	2.07355	1.74174	0.658315	3.5151	0	0	0	0	0	0.58585	1.43503	0.58585	3.2435	4.0814	0	0	0	0	1.22082	1.90975	0.779653	2.8727	0	0	0	4.8679	0	0	1.1058	1.97439	0.746249	3.2474	3.5706
	793	2.4694	384.118	C14H17N5O8;C18H26BrNO3;C17H19N3O6;C20H21NO4;C16H23NO6;C16H17N3O4;C11H26NO6P;C19H19NO2;	H;H;Na;Na_Na;NaCl;HCOONa;HCOOK;Na_HCOONa;	4.71211	Succinyladenosine; Atropine methylbromide; Hyoscyamine methylbromide; Varenicline tartrate; Canadine; Eschscholtzidine; Evoprenine; Papaverine; Capobenic acid; Monocrotaline; Anthramycin; PC(O-2:0/O-1:0); Melosatin B	3	0	0	0	3.9933	2.7607	0	0	0	0.84425	1.59758	0.603829	0	3.5274	0	0	0	0	0.5879	1.44006	0.5879	0	0	0	0	0	0	0	0	0	0	0	0	2.9267	0	0	0	0.4181	1.10619	0.4181	2.5832	3.1887
	794	2.47	617.314				Unidentified	4	0	0	2.6995	2.7175	2.4439	0	0	0	0.982612	1.3586	0.513502	2.9769	3.5816	0	0	0	0	1.09308	1.70416	0.69572	0	0	0	0	0	0	0	0	0	4.9673	5.818	5.8263	5.8145	5.0168	0	0	3.92041	2.70364	1.02188	5.7046	4.8807
	795	2.4702	503.303	C29H48O2;	KCl;	1.68884	Hydroxy-isofucosterol; Fucosterol epoxide; Ethano-hydroxy-dihydrovitamin D3; Dimethylvitamin D3; Hydroxyvitamin D5; Hydroxy-dimethylvitamin D3; Hydroxy-dihydro-ethanovitamin D3; Hydroxy-methyl-cholestene-carbaldehyde; Formyl-methyl-cholestaenol; hydroxymethyl-methyl-cholestadienol; Cholesteryl acetate	3	4.3661	3.5335	3.6862	4.5124	5.1299	0	0	0	2.65351	2.25151	0.850991	5.8985	6.1913	7.0888	6.939	8.6931	0	5.80178	3.00437	1.22653	0	0	0	0	0	0	0	0	0	0	0	0	0	0	0	0	0	0	0	0	0
	796	2.4702	702.132	C22H24N10O12S2;C35H36ClNO3S;C23H34ClN5O8S;	NH3;NaClx2;NaCl_HCOONa;	2.53513	Pirazmonam; Montelukast; Monochloro-monoglutathionyl melphalan	3	0	0	2.0439	0	0	0	0	0	0.255487	0.722628	0.273128	2.5442	0	0	0	0	0	0.424033	1.03867	0.424033	0	0	0	0	0	0	0	0	0	0	0	0	3.4008	0	0	0	0.485829	1.28538	0.485829	0	0
	797	2.4722	638.299	C24H48N2O12S2;C28H54NO8P;	NH3;KCl;	2.69466	Suxemerid sulfate; PC(20:1)	3	2.6949	4.5649	4.1097	5.312	4.447	0	0	0	2.64106	2.30471	0.871099	4.1367	6.2178	5.3233	0	0	0	2.61297	2.93753	1.19924	0	4.9386	0	0	0	0	0.8231	2.01618	0.8231	6.2689	8.3778	7.2517	6.8222	6.8013	0	0	5.07456	3.52647	1.33288	5.4618	5.9085
	798	2.4724	70.067				Unidentified	4	0	2.2766	0	2.8747	3.6096	0	0	0	1.09511	1.55296	0.586965	3.0743	2.9755	0	0	0	0	1.0083	1.56236	0.637832	0	1.1967	0	0	0	0	0.19945	0.488551	0.19945	3.023	0	0	4.0572	2.8209	0	0	1.41444	1.80519	0.682299	3.6391	3.8292
	799	2.4725	823.407	C40H40N4O14;	Na;	2.92745	Heptacarboxylporphyrin III	3	0	18.9083	0	0	22.9245	0	0	0	5.2291	9.74173	3.68203	0	0	0	0	0	0	0	0	0	0	10.4328	0	0	0	0	1.7388	4.25917	1.7388	0	0	0	0	30.7694	0	0	4.39563	11.6297	4.39563	0	0
	800	2.4734	752.504	C41H73NO8;	Na_Na;	0.996672	bacteriohopane-,32,33,34-triol-35-cyclitol; bacteriohopanetetrol cyclitol;;	3	0	0	0	3.2345	3.6875	0	0	0	0.86525	1.6067	0.607275	0	0	0	0	0	0	0	0	0	3.7131	4.0155	0	0	0	0	1.2881	1.99781	0.815601	0	0	0	2.7957	0	0	0	0.399386	1.05668	0.399386	0	2.601
	801	2.4741	399.196	C22H29FO4;C22H32O3S;C23H28N4;C22H24ClN3O;C16H33FO2S;	Na;Na;K;NH3;Na_HCOONa;	2.10423	Fluoro-dihydroxy-methylpregnadiene-dione; Desoximetasone; Fluocortolone;Fluorometholone; Hydroxy-mercaptoandrostenone-propionate; Calycanthidine; Azelastine; Hexadecylsulfonyl Fluoride	3	0	1.9314	2.5594	2.6703	2.2132	0	0	0	1.17179	1.27194	0.48075	3.3428	0	0	0	0	0	0.557133	1.36469	0.557133	0	0	0	0	0	0	0	0	0	0	0	0	0	0	0	0	0	0	0	2.4615	0
	802	2.4742	450.156	C21H25N5O4;C26H28ClNO;C22H24ClN3O;	K;Na_Na;HCOONa;	4.86498	Piroxantrone; Teloxantrone; Clomifene; Clomiphene; Toremifene; Azelastine	3	3.4866	0	3.1119	4.4069	4.0054	0	0	0	1.87635	2.04027	0.771148	3.2343	3.6588	0	0	0	0	1.14885	1.78485	0.72866	3.9723	0	0	0	0	0	0.66205	1.62168	0.66205	3.2111	0	6.0938	3.7146	4.5553	0	0	2.51069	2.5123	0.949558	3.352	3.3763
	803	2.4744	247.128	C11H22O3;C10H20O;	Na_Na;Na_HCOONa;	2.22557	Hydroxy-undecanoic acid; hydroxy hendecanoic acid; Citronellol; Menthol; Neomenthol; Dimethyl-Octenol; Decenol; Methyl-nonenol; Decanal	3	2.8369	2.9692	3.7975	3.1229	4.0873	0	0	0	2.10173	1.78908	0.676209	2.8964	2.835	0	0	0	0	0.955233	1.47997	0.604195	3.6399	3.2925	4.74	0	0	0	1.9454	2.18401	0.891619	0	0	0	2.8371	0	0	0	0.4053	1.07232	0.4053	0	0
	804	2.4747	389.208	C21H28N2O5;C24H30O3;C21H34O4;C21H25NO5;C22H21N5O;	H;Na;K;NH3;NH3;	3.62274	Doxylamine succinate; Trimethobenzamide; Drospirenone; 11-deoxy-11-methylene-PGD2; Trihydroxy-pregnanone; Tetrahydrocorticosterone; Pregnane-triolone; 9-deoxy-9-methylene-PGE2; Tetrahydrocorticosterone; 7-O-Acetylsalutaridinol; Androcymbine; Capaurine; Demecolcine; CRA_23653	3	0	0	0	0	0	0	0	0	0	0	0	0	1.4095	0	0	0	0	0.234917	0.575426	0.234917	3.9998	3.1883	0	0	0	0	1.19802	1.87362	0.764901	0	0	0	0	0	0	0	0	0	0	0	0
	805	2.4747	877.757				Isotope	4	0	0	2.656	3.2396	3.6723	0	0	0	1.19599	1.67298	0.632327	0	0	0	0	0	0	0	0	0	4.5525	0	0	0	0	0	0.75875	1.85855	0.75875	0	0	0	0	0	0	0	0	0	0	0	0
	806	2.4748	283.148				Unidentified	4	0	1.774	2.3708	0	0	0	0	0	0.5181	0.972504	0.367572	0	0.7036	0	0	0	0	0.117267	0.287243	0.117267	2.9297	3.1141	0	0	0	0	1.0073	1.56159	0.637517	0	0	0	0	0	0	0	0	0	0	0	0
	807	2.4749	448.14	C16H27NO12;C20H24FN3O4;	Na;NaCl;	2.3207	Hyaluronic acid; Balofloxacin	3	0	1.3291	1.4173	0	0.8244	0	0	0	0.44635	0.639314	0.241638	0	1.7608	0	0	0	0	0.293467	0.718844	0.293467	0	0	0	0	0	0	0	0	0	0	0	0	0	0	0	0	0	0	0	0	0
	808	2.4751	511.161	C22H32N2O7;C20H37O8P;C21H30O8S;C22H28N2O4;	KCl;KCl;HCOONa;NaCl_HCOONa;	4.55826	Isoaminile citrate; Dolichyl D-xylosyl phosphate; Cortisol 21-sulfate; 16-Methoxy-2,3-dihydro-3-hydroxytabersonine; 3-hydroxy-16-methoxy-2,3-dihydrotabersonine; Rhyncophylline	3	4.7148	5.5023	4.3691	3.0944	5.2504	0	0	0	2.86638	2.47868	0.936851	4.4061	5.7866	4.7803	0	0	0	2.4955	2.77073	1.13114	4.1827	1.6736	0	0	0	0	0.97605	1.70762	0.697134	0.9647	0	0	0	0	0	0	0.137814	0.364622	0.137814	0	0
	809	2.4751	608.263				Unidentified	4	0	0.5763	0	0	1.4932	0	0	0	0.258688	0.538041	0.20336	0	0	0	0	0	0	0	0	0	0	0	0	0	0	0	0	0	0	3.0145	0	0	0	3.9677	0	0	0.997457	1.72556	0.652202	2.6303	0
	810	2.4753	327.136	C18H19ClN4;C18H24O3;C17H22O;	H;K;HCOOK;	1.52842	Clozapine; Epiestriol; Hydroxyestradiol; estradiol-semiquinone; Epiestriol; Hydroxyestradiol; Hydroxy-estradiol; Hydroxy-octadecadiene-diynoic acid; Homo-A-nor-oxaandrostene-dione; Estriol; Falcarinone	3	0	1.3362	1.1216	0	1.0168	0	0	0	0.434325	0.60571	0.228937	0	0	0	0	0	0	0	0	0	0	0	0	0	0	0	0	0	0	0	0	0	0	0	0	0	0	0	0	0	0
	811	2.4754	449.221	C23H36Cl3N;C24H36O5;C23H34O3;	NH3;Na_Na;Na_HCOONa;	2.93839	Chloro-bis(chloroethyl)-androsten-amine; Hydroxy-dioxo-cholanoic Acid; Dihydroxy-oxocholenoic Acid; Lovastatin; Hydroxy-dimethylpregnenedione; Butyl-methoxy-estratriene-diol; Hydroxy-homoandrostenone propionate; Hydroxy-methylandrostenone propionate; Pregnenolone acetate	3	0	0	0	2.7196	2.6865	0	0	0	0.675763	1.2513	0.472947	2.4503	3.1069	0	0	0	0	0.9262	1.44981	0.591882	0	0	0	0	0	0	0	0	0	3.742	4.437	0	3.2647	3.4708	0	0	2.13064	2.02554	0.765581	3.9555	3.0149
	812	2.4756	580.148	C29H25N3O5;	HCOOK;	0.775663	Nicomorphine	3	0	1.5403	1.2384	0	0	0	0	0	0.347337	0.648186	0.244991	0	0	0	0	0	0	0	0	0	0	0	0	0	0	0	0	0	0	2.9197	0	0	2.7632	3.3597	0	0	1.2918	1.62102	0.612689	0	0
	813	2.4764	461.255	C26H42O2;	KCl;	3.68558	Hydroxy-deoxy-oxavitamin D3	3	6.5168	4.7325	4.2866	4.8615	5.8498	6.1666	0	0	4.05173	2.61287	0.987572	4.4714	4.9442	5.4937	0	0	7.4453	3.72577	3.05823	1.24852	5.5727	5.531	5.5275	0	0	0	2.77187	3.03647	1.23963	3.1451	4.9699	5.2056	3.3444	4.5602	0	0	3.03217	2.21027	0.835404	3.9724	3.4809
	814	2.4769	585.374	C33H54O7;C30H60O3;	Na;NaClx2;	4.50992	Cholesterol glucuronide; 30-hydroxy-triacontanoic acid	3	0	0	0	0	2.416	0	0	0	0.302	0.854185	0.322852	0	0	0	0	0	0	0	0	0	3.1435	0	0	0	0	0	0.523917	1.28333	0.523917	0	0	0	0	0	0	0	0	0	0	2.143	0
	815	2.4775	276.144	C11H19N5O2;C10H23N3O2;	Na;NaCl;	2.96946	Dioxooctahydropyrrolo[1,2-a]Pyrazinyl]Propyl}Guanidine; Deoxyhypusine	3	0	2.1984	0	3.4796	2.5612	0	0	0	1.0299	1.46457	0.553556	0	3.2434	0	0	0	0	0.540567	1.32411	0.540567	0	0	0	0	0	0	0	0	0	2.7423	0	0	0	3.0557	0	0	0.828286	1.41746	0.535749	0	0
	816	2.4778	601.332	C27H53O12P;C34H48O9;C31H48O7;	H;H;HCOONa;	0.282704	PI(18:0); Oxoavermectin-aglycone; dihydroxy-oxavitamin D3 3-hemiglutarate	3	3.688	2.8292	3.4949	4.0987	3.6995	0	0	0	2.22629	1.87673	0.709338	3.4296	4.7608	4.1385	0	0	0	2.05482	2.29002	0.934896	3.2374	3.4793	0	0	0	0	1.11945	1.73593	0.708691	4.8187	0	0	3.8967	4.8898	0	0	1.9436	2.4451	0.924163	4.4278	4.0777
	817	2.4781	251.108				Unidentified	4	0	1.047	0	0	0	0	0	0	0.130875	0.37017	0.139911	0	0	0	0	0	0	0	0	0	0	0	0	0	0	0	0	0	0	0	0	0	0	0	0	0	0	0	0	0	0
	818	2.4783	779.638	C42H84NO8P;C46H88O5;C43H88O3;	NH3;NaCl;NaCl_HCOONa;	2.37293	PC(34:0); PE(37:0); PE-NMe(36:0); DG(43:1); 2,3-Di-O-phytanyl-sn-glycerol; Archaeol	3	0	0	0	0	0.6974	0	0	0	0.087175	0.246568	0.093194	0	0	0	0	0	0	0	0	0	0	3.7192	0	0	0	0	0.619867	1.51836	0.619867	0	0	0	0	0	0	0	0	0	0	0	0
	819	2.4784	230.138				Unidentified	4	0	0	0	0	1.8714	0	0	0	0.233925	0.66164	0.250076	0	0	0	0	0	0	0	0	0	4.0532	0	0	0	0	0	0.675533	1.65471	0.675533	0	0	0	0	0	0	0	0	0	0	0	0
	820	2.4785	481.262	C25H38N4O3;C27H32N4;C24H44O2;	K;HCOONa;NaClx2;	0.35324	Dimethyl-Methylamino-Propionylamino-Butyryl-Pyrrolidine-Carboxylic Acid(Tetrahydro-Naphthalenyl)-Amide; Propidium; Tetracosadienoic acid	3	2.6434	0	0	0	0	0	0	0	0.330425	0.934583	0.353239	0	0	0	0	0	0	0	0	0	0	2.8373	0	0	0	0	0.472883	1.15832	0.472883	1.5387	0	0	0	2.2564	0	0	0.542157	0.948806	0.358615	0	0
	821	2.4786	366.142	C18H21N3O4;C15H16N4O6;C18H15F3N2O2;C13H21N2O7P;C17H19N3O2;	Na;NH3;NH3;NH3;HCOONa;	1.52946	Acrinol; Musca-aurin VII; Riboflavin reduced; Flumizole; Vitamin B6 Complexed with 2-Amino-Pentanoic Acid; GA	3	0	0	0	0	0	0	0	0	0	0	0	0	0	0	0	0	0	0	0	0	0	0	0	0	0	0	0	0	0	0	0	0	0	0	0	0	0	0	0	2.0763	0
	822	2.4789	712.184	C32H40BrN5O5;	NaCl;	4.4511	Bromocriptine	3	0	0.7483	0.287	0	0	0	0	0	0.129412	0.269481	0.101854	0	0	0	0	0	0	0	0	0	0	0	0	0	0	0	0	0	0	0	0	0	0	1.7481	0	0	0.249729	0.66072	0.249729	0	0
	823	2.4791	180.067				Unidentified	4	19.4175	18.9998	22.339	20.9247	22.8894	23.6882	13.0813	17.6573	19.8746	3.44027	1.3003	23.9734	20.3628	20.0758	20.9693	16.08	12.0283	18.9149	4.21224	1.71964	21.5101	22.7042	21.0879	15.9124	15.6906	15.3293	18.7058	3.40062	1.3883	17.8763	23.3231	21.2574	22.1744	22.7035	13.043	15.733	19.4444	3.95005	1.49298	17.6302	22.1891
	824	2.4791	775.511				Unidentified	4	0	0	0	0	1.5417	0	0	0	0.192713	0.545073	0.206018	0	0	0.0799	0	0	0	0.0133167	0.032619	0.0133167	2.9068	0	0	0	0	0	0.484467	1.1867	0.484467	0	0	0	0	0	0	0	0	0	0	0	0
	825	2.4799	138.095				Unidentified	4	0	1.1463	0	0	0	0	0	0	0.143288	0.405278	0.153181	0	0	0	0	0	0	0	0	0	0	3.0585	0	0	0	0	0.50975	1.24863	0.50975	0	0	0	0	0.6318	0	0	0.0902571	0.238798	0.0902571	0	0
	826	2.4802	51.3172				Unidentified	4	0	0	0	0	1.5943	0	0	0	0.199288	0.56367	0.213047	0	0	0	0	0	0	0	0	0	0	0	0	0	0	0	0	0	0	2.8424	0	0	2.7187	0.2851	0	0	0.835171	1.3335	0.504014	0	0
	827	2.4806	488.241	C19H39N5O7;	K;	1.00359	Gentamicin C1a	3	0	0	2.632	2.6522	3.1049	0	0	0	1.04864	1.4543	0.549673	2.4214	0	0	0	0	0	0.403567	0.988532	0.403567	0	0	0	0	0	0	0	0	0	0	0	0	0	3.5564	0	0	0.508057	1.34419	0.508057	3.3038	0
	828	2.4807	419.217	C18H37O7P;C23H34O4;C22H36O2Si;C22H32O2;	Na;Na_Na;NaCl;Na_HCOONa;	3.81665	Hydroxy-(phosphonooxy)octadecanoate; Hydroxy-tetranorvitamin D3 23-carboxylic acid; (Dihydroxy-Dimethyl-Hexadecahydro-Cyclopenta Phenanthrenyl)-Furanone; Androstene-diol diacetate; Digitoxigenin; Silandrone; Docosahexaenoic acid; Docosatriynoic acid; Methylpregnene-dione; Docosatriynoic acid; Methylprogesterone; Docosa-Hexaenoic Acid; Promestriene; Retinol Acetate	3	1.0415	0	0	0	1.0976	0	0	0	0.267388	0.495332	0.187218	0	0	0	0	0	0	0	0	0	0	0.7976	0	0	0	0	0.132933	0.325619	0.132933	0	0	0	0	0	0	0	0	0	0	0	0
	829	2.4807	422.145	C22H25NO4S;C19H15F3N4O3;C21H32BrN;C22H25N3O;C13H19N7O5;	Na;NH3;Na_Na;KCl;HCOONa;	4.8325	Adrogolide; Tosufloxacin; Lauryl isoquinolinium bromide; Indoramin; Seryl-Amino-(Deoxy)-Adenosine	3	0	1.4843	0	0	0	0	0	0	0.185537	0.524779	0.198348	0	0	0	0	0	0	0	0	0	0	3.7297	0	0	0	0	0.621617	1.52264	0.621617	0	0	0	0	0	0	0	0	0	0	0	0
	830	2.4812	186.161				Unidentified	4	0	0	0	0	0.4085	0	0	0	0.0510625	0.144427	0.0545881	0	0	0	0	0	0	0	0	0	0	0	0	0	0	0	0	0	0	0	0	0	0	0	0	0	0	0	0	0	0
	831	2.4824	134.097				Unidentified	4	0	2.984	3.1719	0	1.3613	0	0	0	0.93965	1.40177	0.529821	2.7497	2.231	0	0	0	0	0.830117	1.29643	0.529265	3.701	0	0	0	0	0	0.616833	1.51093	0.616833	0	0	0	0	0	0	0	0	0	0	0	0
	832	2.4827	244.162	C14H23NO;	Na;	0.532422	Tapentadol	3	0	0	1.3414	0	0	0	0	0	0.167675	0.474257	0.179252	0	0	0	0	0	0	0	0	0	0	0	0	0	0	0	0	0	0	0	0	0	0	0	0	0	0	0	0	0	0
	833	2.4828	505.165	C28H26N4O3;C24H25FN4O2;C16H24N10O4;	K;HCOOK;HCOOK;	1.44507	Staurosporine; Ocaperidone; Aminophylline	3	0	1.8418	0	0	2.451	0	0	0	0.5366	1.00684	0.38055	0	0	0	0	0	0	0	0	0	0	0	0	0	0	0	0	0	0	0	0	0	0	0	0	0	0	0	0	0	0
	834	2.4829	416.23	C22H22N8;C18H35N3O4;	NH3;NaCl;	4.70893	Bisantrene; Leucyl-leucyl-norleucine	3	11.4702	9.8308	12.0568	11.6623	13.2453	10.6851	11.666	12.0666	11.5854	1.00881	0.381294	8.7879	8.4875	9.5752	10.7464	11.2449	7.5727	9.40243	1.39953	0.571357	15.56	13.5422	10.5743	16.9251	0	10.8726	11.2457	6.05307	2.47116	10.2365	0	10.4794	8.6117	10.5816	1.5459	2.9973	6.35034	4.65154	1.75812	7.8517	8.0473
	835	2.483	128.072				Unidentified	4	0	0	0	0	2.0673	0	0	0	0.258412	0.730901	0.276255	2.4235	0	0	0	0	0	0.403917	0.98939	0.403917	0	0	0	0	0	0	0	0	0	0	0	0	0	3.6464	0	0	0.520914	1.37821	0.520914	0	0
	836	2.483	387.214	C17H27N3O4S;C22H32O2;C19H36O3;	NH3;NaCl;KCl;	1.42043	Amisulpride; Docosahexaenoic acid; Docosatriynoic acid; Methylpregnenedione; Docosatriynoic acid; Methylprogesterone; Methyl-pregnene-dione; Docosatriynoic acid; Docosa-Hexaenoic Acid; Promestriene; Retinol Acetate; oxo-nonadecanoic acid	3	0	0.6651	1.9061	0	1.69	0	0	0	0.53265	0.816084	0.308451	0	0	0	0	0	0	0	0	0	0	0	0	0	0	0	0	0	0	0	0	0	0	0	0	0	0	0	0	0	0
	837	2.4834	392.137	C18H28NO4P;C22H23NO2;C19H27NO3;C19H21N3O;C16H24FNO;	K;NaCl;KCl;HCOOK;NaCl_HCOONa;	0.255013	Dimemorfan phosphate; (alphaS,betaS)-alpha-Ethyl-alpha-(4-methoxyphenyl)-beta-phenyl-2- pyridineethanol"; Enpromate; Glycopyrrolate; Nateglinide; Protoemetine; Tetrabenazine; Alcaftadine; Talastine; Zolpidem; UH-301	3	8.4129	7.8955	9.2902	8.6796	7.9912	6.4912	0	0	6.09507	3.84623	1.45374	14.5561	17.3477	13.7154	12.5232	12.0905	10.4614	13.449	2.3717	0.968244	11.5045	10.1657	7.221	0	0	0	4.8152	5.45382	2.22651	14.8645	17.195	16.9889	14.3975	18.4818	10.3292	6.5779	14.1193	4.25434	1.60799	5.7431	6.8047
	838	2.4834	470.145	C24H19NO5;C21H23NO6;C22H21NO5;C17H21N5O3;	HCOONa;HCOOK;Na_HCOONa;NaCl_HCOONa;	4.99872	Oxyphenisatin acetate; Polycarpine; Angoline; N-Methyl-2,3,7,8-tetramethoxybenzophenanthridine-6(5H)-one; (5z)-2-[(1s,2r)-1-Amino-2-Hydroxypropyl]-5-[(4-Amino-1h-Indol-3-Yl)Methylene]-3-(2-Hydroxyethyl)-3,5-Dihydro-4h-Imidazol-4-One	3	0	0	0	0	0	0	0	0	0	0	0	0	0	0	0	0	0	0	0	0	0	0	0	0	0	0	0	0	0	0	0	0	0	0	0	0	0	0	0	0	0
	839	2.4836	798.666				Unidentified	4	0.2307	0.4824	0	0	1.0938	0	0	0	0.225863	0.39174	0.148064	0	0.2824	0	0	0	0	0.0470667	0.115289	0.0470667	0	0	0	0	0	0	0	0	0	0.1481	0	0	0	0	0	0	0.0211571	0.0559765	0.0211571	0	0
	840	2.4838	725.218	C44H32N4O4;C22H46N6O14S;C37H40N2O6;	Na_Na;KCl;NaClx2;	3.99881	Temoporfin; Arbekacin sulfate; Berbamine; Gyrocarpine; Oxyacanthine; Pycnamine; Thalmine; Tubocurarine	3	0	0.5017	0.6089	0	0.9133	0	0	0	0.252988	0.367337	0.138841	0	0	0	0	0	0	0	0	0	0	0	0	0	0	0	0	0	0	0	0	0	0	0	0	0	0	0	0	0	0
	841	2.4845	733.207				Unidentified	4	0	1.1054	0	0	1.9697	0	0	0	0.384387	0.748293	0.282828	0	0	0	0	0	0	0	0	0	0	0	0	0	0	0	0	0	0	0	0	0	3.7747	0	0	0	0.539243	1.4267	0.539243	2.8773	0
	842	2.4848	391.232	C19H32N2O5;	Na;	3.65524	Perindopril	3	0	0.6344	0	0	1.9332	0	0	0	0.32095	0.688233	0.260128	0	0	0	0	0	0	0	0	0	0	0	0	0	0	0	0	0	0	0	0	0	0	0	0	0	0	0	0	0	0
	843	2.4855	638.189	C28H35N5O5;	NaClx2;	2.24072	Morphiceptin	3	2.9005	2.438	0	0	4.5792	0	0	0	1.23971	1.81386	0.685576	0	0	0	0	0	0	0	0	0	3.7575	3.6325	0	0	0	0	1.23167	1.9085	0.779142	5.3196	0	0	0	0	0	0	0.759943	2.01062	0.759943	0	0
	844	2.4857	345.233	C18H38O;	KCl;	3.50488	Dimethyl-hexadecanol; Isostearyl alcohol; Octadecanol	3	0	2.0479	1.6732	0	0	0	0	0	0.465137	0.86707	0.327722	0	1.2031	0	0	0	0	0.200517	0.491164	0.200517	2.7437	0	0	0	0	0	0.457283	1.12011	0.457283	0	0	0	0	0	0	0	0	0	0	0	0
	845	2.4861	395.203	C22H28F2O4;C18H30O5;C16H32O5;	H;HCOONa;Na_HCOONa;	2.27731	Diflucortolone; 2,3-dinor-6-keto-prostaglandin; hydroperoxy-9Z,12Z,15Z-octadecatrienoic acid; trihydroxy palmitic acid	3	0	0	0	0	0.8302	0	0	0	0.103775	0.29352	0.11094	0	0	0	0	0	0	0	0	0	0	0	0	0	0	0	0	0	0	0	0	0	0	0	0	0	0	0	0	0	0
	846	2.4862	377.152	C17H26N2O4S;C22H26O3;C22H17NO4;C20H25FO3;C17H26N4O;C12H24N2O7;	Na;K;NH3;Na_Na;KCl;HCOONa;	4.34839	Sultopride; Dimethoxy-norpregna-pentaenone; Resmethrin; Crinasiatine; Fluoro-hydroxy-methylandrosta-diene-dione; Alniditan; Emedastine; deoxy-(N6-lysino)-fructose; Fructoselysine	3	0	0	0	0	0	0	0	0	0	0	0	0	0	0	0	0	0	0	0	0	0	0	0	0	0	0	0	0	0	0	0	0	0	0	0	0	0	0	0	0	0
	847	2.4863	286.173	C18H23NO2;C18H20O2;	H;NH3;	0.174715	Isococculidine; Ketazocine; Dihydroequilenin; Hydroxyestra-tetraen-one; (Ethyl-butenylidene)diphenol; Methyl-bis-(p-hydroxyphenyl)pentene; Octadecatetraynoic acid; Diethylstilbestrol; Equilin; Indanestrol	3	0	0.9873	0	0	1.5449	0	0	0	0.316525	0.60474	0.22857	0	1.7299	0	0	0	0	0.288317	0.706229	0.288317	0	0	0	0	0	0	0	0	0	0	0	0	0	0	0	0	0	0	0	2.4173	0
	848	2.4865	351.044	C15H14O7;C14H12O5;C9H12N4O3;	Na_Na;Na_HCOONa;NaCl_HCOONa;	2.3074	Epigallocatechin; Gallocatechin; Leucocyanidin; Khellin; Etofylline; Temurin	3	0	0	0	0	0	0	0	0	0	0	0	0	0	0	0	0	0.296	0.0493333	0.120841	0.0493333	0	0	0	0	0	0	0	0	0	0	0	0	0	0	0	0	0	0	0	0	0
	849	2.4888	324.153	C19H21N3S;C13H23N3O5;C16H25NO3;C12H21N3O3;C15H23NO;	H;Na;Na_Na;HCOONa;Na_HCOONa;	0.0616993	Cyamemazine; Metiapine; (Ac)-Lys-Ala; Acetyl-Amino-Diethylcarboxamide-Dihydro-2h-Pyran-Carboxylic Acid; Axomadol; Moxisylyte; Serratine; Pyrrolysine; Deoxynupharidine; Meptazinol	3	0	1.0498	1.2903	0	0	0	0	0	0.292513	0.545428	0.206153	0	0	0	0	0	0	0	0	0	0	0	0	0	0	0	0	0	0	0	0	0	0	0	0	0	0	0	0	0	0
	850	2.4889	524.063	C15H19N5O6S;C20H19N3O4S;	NaCl_HCOONa;NaCl_HCOONa;	3.77819	S-Adenosyl-methylthio-oxobutanoate; Rivoglitazone	3	0	0	2.6425	2.7094	0	0	0	0	0.668988	1.23885	0.468242	2.3106	0	0	0	0	0	0.3851	0.943298	0.3851	0	0	0	0	0	0	0	0	0	0	0	0	0	0	0	0	0	0	0	2.9319	0
	851	2.4892	307.097	C10H16N6O3;C8H12N5O5P;C15H18O4;C11H14N2O4;C14H16O2;C9H16N4;	K;NH3;Na_Na;HCOONa;Na_HCOONa;NaCl_HCOONa;	4.36354	Amino-[(Hydroxy-Hydroxymethyl-Ethylamino)-Ethyl]-Dihydro-Purinone; PMEG; Artemisin; Dihydrogriesenin; Farinosin; Grosshemin; Helenalin; Marasmic acid; Mexicanin I; Microhelenin A; Parthenin; Stramonin B; Amino-(Hydroxy-Dihydro-6h-Cyclohepta[D]-Isoxazolyl)Propionic Acid; Felbamate; Tetradecadiene-diynoic acid; Dimethyldodeca-pentaene-dial; Naproxol; {[Ethyl(Methyl)Amino]Methyl}-Methyl-Dihydropyrim…	3	0	2.0357	2.3635	0	0	0	0	0	0.5499	1.02198	0.386272	0	0	0	0	0	0	0	0	0	0	0	0	0	0	0	0	0	0	3.2904	0	0	0	0	0	0	0.470057	1.24365	0.470057	0	2.5054
	852	2.4895	306.086	C12H12ClN7O;C12H17N3O4;C14H17NO3;C11H21NO4;C13H16ClNO;C11H17NO;	H;K;NaCl;KCl;HCOONa;NaCl_HCOONa;	3.82246	Phenylamil; Agaritine; Fagaramide; AminoethylNonanedioic Acid; Isobutyryl-carnitine; Butoxycarbonyl-leucine; O-Butanoylcarnitine; Esketamine; Ketamine; Candicine; Methylephedrine; Methoxyphenamine; Mexiletine; Tecomine	3	0	0	3.2727	2.8221	0	0	0	0	0.76185	1.4158	0.535123	2.5373	3.583	0	0	0	0	1.02005	1.61448	0.65911	0	0	0	0	0	0	0	0	0	4.2971	0	0	0	4.0175	0	0	1.1878	2.03016	0.767328	0	2.9304
	853	2.4897	204.091	C8H19N;	KCl;	0.881958	Octodrine; Octylamine	3	0	0	0	0	0	0	0	0	0	0	0	0	2.7993	0	0	0	0	0.46655	1.14281	0.46655	0	0	0	0	0	0	0	0	0	0	0	0	2.9337	0	0	0	0.4191	1.10883	0.4191	2.6759	0
	854	2.4905	486.262	C20H36O12;C27H30F2N2O3;	NH3;NH3;	3.29045	Octanoyl-Glucopyranosyl-Fructofuranoside; Octanoyl-Fructofuranosyl-Glucopyranoside, Sucrose Monocaproylate; Lomerizine	3	0	0	0.8139	0	0	0	0	0	0.101737	0.287757	0.108762	0	1.0192	0	0	0	0	0.169867	0.416087	0.169867	0	0	0	0	0	0	0	0	0	0	0	0	0	0	0	0	0	0	0	0	2.5205
	855	2.4914	904.77				Unidentified	4	0	1.1896	1.0903	0	2.2672	0	0	0	0.568388	0.858536	0.324496	0	0	0	0	0	0	0	0	0	0	0	0	0	0	0	0	0	0	0	0	0	0	0	0	0	0	0	0	0	0
	856	2.4917	153.139	C9H13N;	NH3;	0.130601	Propyl-Aniline; Phenylpropylamine; Para-Isopropylaniline	3	3.1709	0	2.8497	3.0255	0	0	0	0	1.13076	1.56297	0.590746	0	0.8787	0	0	0	0	0.14645	0.358728	0.14645	4.6119	4.5626	0	0	0	0	1.52908	2.3689	0.967098	0	0	0	0	0	0	0	0	0	0	0	0
	857	2.4917	211.127				Unidentified	4	0	0	0	0	0	0	0	0	0	0	0	0	0	0	0	0	0	0	0	0	0	0	0	0	0	0	0	0	0	0	0	0	0	0	0	0	0	0	0	0	0
	858	2.4917	752.36	C35H57NO11;	HCOOK;	0.637991	Mycinamicin VI	3	0	1.6874	2.7319	0	4.1397	0	0	0	1.06988	1.61646	0.610965	0	0	0	0	0	0	0	0	0	4.4134	3.738	0	0	0	0	1.35857	2.11549	0.863646	0	0	0	0	0	0	0	0	0	0	0	0
	859	2.492	457.117	C17H27N2O8P;C22H24N2O4S;C21H23ClN4O2;C20H21ClN2O4;C15H24N4O5S;C19H24N4O2;	K;Na_Na;NaCl;HCOONa;HCOOK;NaClx2;	0.721918	N-Pyridoxyl-7-Keto-8-Aminopelargonic Acid-5'-Monophosphate; RB106; Cloperidone; Fipexide; Sulfisoxazole diolamine; Pentamidine	3	4.7496	4.2231	4.0619	4.4047	4.7759	0	0	0	2.7769	2.31188	0.873808	5.0688	6.1293	4.2441	0	0	0	2.5737	2.88201	1.17657	3.6415	0	0	0	0	0	0.606917	1.48664	0.606917	6.0978	6.9033	5.7814	8.1326	5.9742	9.7333	6.0306	6.95046	1.47404	0.557136	3.6842	4.893
	860	2.4922	444.233	C22H33NO4;C20H35N3;	HCOONa;NaCl_HCOONa;	4.27702	Icaceine; Pentazocine lactate; (-)-Ormosanine; Piptanthine; Templetine	3	0	0	1.3493	0	0	0	0	0	0.168662	0.47705	0.180308	2.4314	0	0	0	0	0	0.405233	0.992615	0.405233	0	0	0	0	0	0	0	0	0	0	0	0	0	0	0	0	0	0	0	2.19	0
	861	2.4927	174.024				Unidentified	4	3.041	0	0	3.4649	4.0483	4.8128	0	0	1.92088	2.11413	0.799067	0	0	0	0	0	0	0	0	0	7.7507	9.4028	8.3865	0	0	0	4.25667	4.69263	1.91576	0.4584	0	0	0	0	0	0	0.0654857	0.173259	0.0654857	0	0
	862	2.4928	320.063	C11H15NO2;	NaCl_HCOONa;	4.03047	Salsoline; Dimethyl-dihydroxy-tetrahydroisoquinoline; Methylsalsolinol; Methylenedioxymethamphetamine; Amino-Oxybenzyl-Butanone; Butamben; Heliamine; Isobutamben	3	0	0	0	1.3085	0	0	0	0	0.163562	0.462625	0.174856	0.4461	0	0	0	0	0	0.07435	0.18212	0.07435	0	0	0	0	0	0	0	0	0	0	0	0	0	0	0	0	0	0	0	2.2044	0.4818
	863	2.4945	504.216	C23H33N5O5;	Na_Na;	3.80788	Apstatin	3	0	0	0	0	0	0	0	0	0	0	0	0	0	0	0	0	0	0	0	0	0	0	0	0	0	0	0	0	0	0	0	0	0	0	0	0	0	0	0	0	0
	864	2.4946	201.126				Unidentified	4	0	2.2246	0	0	2.5735	0	0	0	0.599762	1.11445	0.421223	2.4578	0	1.012	0	0	0	0.5783	1.00582	0.410623	2.9426	0.8609	0	0	0	0	0.633917	1.18228	0.482664	2.7069	0	0	0	0	0	0	0.3867	1.02311	0.3867	2.2238	0
	865	2.4949	301.148				Unidentified	4	0	0	0	0	0	0	0	0	0	0	0	0	0	0	0	0	0	0	0	0	0	0	0	0	0	0	0	0	0	0	0	0	0	0	0	0	0	0	0	0	0
	866	2.4949	464.086	C19H21N3O6S;C20H23NO7;C19H22ClNO5;	Na_Na;KCl;HCOOK;	2.02548	Benzyl-(Methoxy-Benzenesulfonyl)-Oxo-Hexahydro-Pyrimidine-Carboxylic Acid Hydroxyamide; Benzylaminocarbonylphenyl-Galactoside; Senaetnine; MN-305	3	0	0	0	0	0	0	0	0	0	0	0	0	0	0	0	0	0	0	0	0	0	0	0	0	0	0	0	0	0	0	0	0	0.2163	0	0	0	0.0309	0.0817537	0.0309	2.2015	0
	867	2.4966	205.1				Unidentified	4	13.9479	15.0256	15.4461	18.4346	16.4877	9.6249	0	0	11.1209	7.30778	2.76208	14.0341	14.7435	15.5023	0	0	0	7.37998	8.09769	3.30587	18.5568	15.4146	7.4825	0	0	0	6.90898	8.38508	3.4232	5.5988	6.001	0	6.0775	6.6372	0	0	3.4735	3.26319	1.23337	7.0012	7.1657
	868	2.4969	178.134				Unidentified	4	0	0	0	0	1.4276	0	0	0	0.17845	0.504733	0.190771	0	0	0	0	0	0	0	0	0	0	0	0	0	0	0	0	0	0	0	0	0	0	0	0	0	0	0	0	0	0
	869	2.4977	571.238	C26H33F3N4O7;C28H36N2O5;	H;Na_HCOONa;	0.525176	[[Trifluoro-Isopropyl-Oxopropyl]Aminocarbonyl]Pyrrolidinyl-]Carbonyl]-Methylpropyl]Aminocarbonyl]Benzoylamino]Acetic Acid; Alangicine	3	0	0	0	0	0	0	0	0	0	0	0	0	0	0	0	0	0	0	0	0	0	0	0	0	0	0	0	0	0	0	0	0	0	0	0	0	0	0	0	0	0
	870	2.4978	326.209				Multiply Charged ion - not identified	4	0	1.065	1.1085	0	0	0	0	0	0.271687	0.503202	0.190192	0	2.5865	0	0	0	0	0.431083	1.05593	0.431083	0	0	0	0	0	0	0	0	0	0	0	0	0	0	0	0	0	0	0	0	0
	871	2.4978	442.151	C18H29N3O5;C20H24ClN3O2;C18H23N5O3;C18H31NO4;C19H27N5;C23H25N;	KCl;HCOONa;HCOOK;NaClx2;NaClx2;NaCl_HCOONa;	3.57345	Bambuterol (INN); Clebopride; Cafedrine; Nitro-octadecadienoic acid; Nitro-octadecadienoic acid; Bisoprolol; (Hydroxy-tetradecenoyl)homoserine lactone; Dapiprazole; Fendiline	3	0	1.8749	2.0762	0	2.4342	0	0	0	0.798163	1.11193	0.420269	0	2.8293	0	0	0	0	0.47155	1.15506	0.47155	0	0	0	0	0	0	0	0	0	0	0	0	0	0	0	0	0	0	0	0	0
	872	2.4992	423.2	C22H30O8;C19H30O6;C20H26N4O2;	H;HCOONa;HCOONa;	1.81947	Valtratum; hydroperoxy-[epidioxy-(octenyl)-cyclopentyl]-heptenoic acid; Hexamidine	3	2.6993	2.6427	2.798	0	2.6595	0	0	0	1.34994	1.44386	0.545729	0	3.0654	0	0	0	0	0.5109	1.25144	0.5109	3.9656	3.6627	0	0	0	0	1.27138	1.97195	0.805044	0	0	0	0	0	0	0	0	0	0	0	0
	873	2.4993	384.767	C4Cl6;	NaCl_HCOONa;	1.19553	Hexachloro-1,3-butadiene	3	0	2.2487	1.955	3.0657	0	0	0	0	0.908675	1.29127	0.488055	0	3.3887	0	0	0	0	0.564783	1.38343	0.564783	3.3305	0	0	0	0	0	0.555083	1.35967	0.555083	0	0	0	0	0	0	0	0	0	0	0	0
	874	2.4998	245.099	C15H13FO2;C10H22O2S;C7H14N4;	H;K;Na_HCOONa;	3.672	Flurbiprofen; MPC-7869; Octyl-Hydroxyethyl Sulfoxide; Guancydine	3	23.1509	22.2894	27.0514	26.5464	27.1889	24.4806	17.2436	19.2604	23.4015	3.68567	1.39305	34.8407	28.3988	24.3453	24.6345	21.9438	16.9343	25.1829	6.05225	2.47082	24.4684	19.4613	17.294	16.3111	17.3446	0	15.8132	8.28329	3.38164	10.8016	11.0071	9.6802	13.3364	13.7871	7.9072	8.8016	10.7602	2.19863	0.831002	19.0614	22.0667
	875	2.5008	139.111				Unidentified	4	0	0	0	0	0.9271	0	0	0	0.115888	0.327779	0.123889	0	0	0	0	0	0	0	0	0	0	0	0	0	0	0	0	0	0	0	0	0	0	0	0	0	0	0	0	0	0
	876	2.5017	312.139				Unidentified	4	0	2.4438	12.6813	0	0	0	0	0	1.89064	4.44316	1.67936	0	0	0	0	0	0	0	0	0	0	0	0	0	0	0	0	0	0	0	0	0	0	0	0	0	0	0	0	0	3.0506
	877	2.5018	336.161				Unidentified	4	0	1.6908	1.5054	0	3.0288	0	0	0	0.778125	1.16219	0.439267	0	0	0	0	0	0	0	0	0	0	0	0	0	0	0	0	0	0	0	0	0	0	0	0	0	0	0	0	0	0
	878	2.5027	703.175	C36H36FeN4O4;C30H38N2O10;	NaCl;NaClx2;	0.782165	Dimethyl Propionate Ester Heme; Carfentanil citrate	3	0	0	0.2004	0	0	0	0	0	0.02505	0.0708521	0.0267796	0	0	0	0	0	0	0	0	0	0	0	0	0	0	0	0	0	0	0	0	0	0	0	0	0	0	0	0	0.8089	0
	879	2.5029	378.145	C21H25NO3;C20H21ClO4;C18H26ClN3;C20H23NO;	K;NH3;NaCl;HCOOK;	3.19982	(Propenyloxy)estra-triene-dione-oxime; Mepenzolate; Nalmefene; Pipethanate; Fenofibrate; Chloroquine; Amitriptylinoxide; Oxaprotiline	3	0	0	0	0	1.1521	0	0	0	0.144012	0.407329	0.153956	2.7296	2.7126	0	0	0	0	0.907033	1.40518	0.573662	0	0	0	0	0	0	0	0	0	0	0	0	0	2.8322	0	0	0.4046	1.07047	0.4046	2.6278	0
	880	2.5031	330.203	C17H23N5O2;C17H20N4O2;	H;NH3;	4.69421	Quinazosin; Sunepitron; Propamidine	3	0	1.8415	1.5311	0	0	0	0	0	0.421575	0.785001	0.296702	3.0149	3.4843	0	0	0	0	1.0832	1.68464	0.687751	0	0	0	0	0	0	0	0	0	0	0	0	0	0	0	0	0	0	0	3.1474	0
	881	2.5034	775.656	C47H92O5;C49H86O2;	K;HCOONa;	1.93385	DG(44:0); Cholesteryl ester (22:1)	3	0	0	1.7759	0	0	0	0	0	0.221988	0.627875	0.237315	0	0	0	0	0	0	0	0	0	0	0	0	0	0	0	0	0	0	0	0	0	0	0.2293	0	0	0.0327571	0.0866673	0.0327571	0	0
	882	2.5036	877.592				Isotope	4	2.7912	2.9889	2.4569	0	3.629	0	0	0	1.48325	1.6182	0.611623	0	0	0	0	0	0	0	0	0	3.549	0	5.9736	0	0	0	1.5871	2.5755	1.05144	0	0	0	0	0	0	0	0	0	0	0	2.6047
	883	2.5038	705.917				Unidentified	4	0	0	17.9633	0	0	0	0	0	2.24541	6.35099	2.40045	0	0	0	0	0	0	0	0	0	0	0	0	0	0	0	0	0	0	0	0	0	0	0.5972	19.8295	0	2.9181	7.46055	2.81982	29.2787	30.0411
	884	2.5043	103.959				Unidentified	4	0	0	0	0	0	0	0	0	0	0	0	0	0	0	0	0	0	0	0	0	0	0	0	0	0	0	0	0	0	0	0	0	0	0	0	0.7216	0.103086	0.272739	0.103086	0	0
	885	2.5045	658.567				Unidentified	4	0	0	1.799	0	0.2798	0	0	0	0.25985	0.62957	0.237955	0	0.8226	0	0	0	0	0.1371	0.335825	0.1371	0	0	0	0	0	0	0	0	0	0	0	0	0	0	0	0	0	0	0	0	0
	886	2.5049	215.128	C12H11N3;	NH3;	1.02264	Amino-methyl-5H-pyridoindole; Dihydro-Benzo[H]Cinnolinylamine; Mefenidil	3	3.1286	2.9115	3.3127	3.4089	4.2297	5.1917	0	0	2.77289	1.85905	0.702654	0.3281	0	4.1233	0	0	0	0.7419	1.66173	0.678399	2.8551	4.975	5.3657	0	0	0	2.1993	2.55623	1.04357	0	0	0	0	2.1952	0	0	0.3136	0.829708	0.3136	0.4044	0
	887	2.5049	657.237	C37H44Cl2N2O2;C30H42O8;	K;NaCl_HCOONa;	2.54093	SR 140333; Proscillaridin	3	0	0	0	1.2863	0	0	0	0	0.160787	0.454776	0.171889	1.4009	0	0	0	0	0	0.233483	0.571915	0.233483	0	0	0	0	0	0	0	0	0	0	0	0	1.7987	0	0	0	0.256957	0.679845	0.256957	2.1252	2.0648
	888	2.5052	463.301	C27H42O6;C24H42O4;C22H44N2;	H;HCOONa;NaCl_HCOONa;	1.61881	Dehydroecdysone; Podecdysone B; Cholane-tetrol; Petromyzonol; Atiprimod	3	0	1.3617	1.4694	0	1.6843	0	0	0	0.564425	0.783912	0.296291	2.854	0	0	0	0	0	0.475667	1.16514	0.475667	0	0	0	0	0	0	0	0	0	6.7828	5.5669	0	7.4119	0	0	0	2.82309	3.5624	1.34646	3.3888	3.4976
	889	2.5056	254.156				Unidentified	4	0	0	0	1.1578	0	0	0	0	0.144725	0.409344	0.154718	0	0	0	0	0	0	0	0	0	0	0	0	0	0	0	0	0	0	0	0	0	0	0	0	0	0	0	0	1.6266	0
	890	2.5057	102.128				Unidentified	4	0	0	2.6741	3.3194	0	0	0	0	0.749188	1.39791	0.528358	3.2935	0	0.8389	0	0	0	0.688733	1.31945	0.538664	4.4468	0	0	0	0	0	0.741133	1.8154	0.741133	0	0	0	3.8023	0	0	0	0.543186	1.43713	0.543186	3.3155	3.5692
	891	2.5062	694.907				Multiply Charged ion - not identified	4	0	0	0.3824	0	0	0	0	0	0.0478	0.135199	0.0511003	0	0	0	0	0	0	0	0	0	0	0	0	0	0	0	0	0	0	2.8681	0	0	3.7591	0	0	0	0.946743	1.6372	0.618804	2.3827	2.5788
	892	2.5064	335.13	C17H20N4S;	Na;	1.85002	Olanzapine	3	0	0	0	0	0	0	0	0	0	0	0	0	0	0	0	0	0	0	0	0	0	0	0	0	0	0	0	0	0	0	0	0	0	0	0	0	0	0	0	0	0
	893	2.5078	244.123				Unidentified	4	5.0348	4.5218	5.5319	5.0873	6.2363	6.3228	0	0	4.09186	2.59673	0.981471	5.6362	6.1254	5.3721	0	0	0	2.85562	3.1375	1.28088	5.9575	4.8225	0	0	0	0	1.79667	2.80643	1.14572	0	0	0	0	0	0	0	0	0	0	4.7649	4.3747
	894	2.5094	879.351	C41H56N8O9;	KCl;	3.45708	Nostocyclopeptide A3	3	1.94	0	0	0	0	0	0	0	0.2425	0.685894	0.259243	0	2.849	0	0	0	0	0.474833	1.1631	0.474833	0	0	0	0	0	0	0	0	0	0.8862	0	0	0	2.1147	0	0	0.4287	0.813513	0.307479	0	0
	895	2.5096	257.176	C11H24O2;	HCOONa;	3.57738	Decyloxy-Methanol	3	0	0	0	0	0.7864	0	0	0	0.0983	0.278034	0.105087	0.141	0	0	0	0	0	0.0235	0.057563	0.0235	0	0	0	0	0	0	0	0	0	0	0	0	0	0	0	0	0	0	0	0	0
	896	2.5105	531.183	C29H33ClN2O3;C20H42O7P2;C21H36N4O5S;C29H32N2O3;C18H32N8O6;C22H32O9;C21H33N2O6P;C22H32N2O5;	K;KCl;KCl;KCl;KCl;Na_HCOONa;Na_HCOONa;NaCl_HCOONa;	3.21923	Loperamide oxide; Phytyl diphosphate; D1927; ERA-923; Rigin; 10-Deacetyl-2-debenzoylbaccatin III; 15-hydroxynorandrostene-3,17-dione glucuronide; Ceronapril; Benzquinamide	3	0	1.2303	1.3799	0	2.0123	0	0	0	0.577813	0.827749	0.31286	0	0	0	0	0	0	0	0	0	0	0	0	0	0	0	0	0	0	0	0	0	0	0	0	0	0	0	0	0	0.3309
	897	2.5113	406.168	C22H25N3O;	NaCl;	4.55477	Indoramin	3	4.1554	4.88	3.9006	5.2466	5.4929	0	0	0	2.95944	2.50511	0.946843	4.2971	4.4071	6.1312	0	0	0	2.47257	2.78559	1.13721	5.7038	4.867	4.1929	0	0	0	2.46062	2.73765	1.11764	5.3963	6.0643	5.3153	4.9662	5.7887	0	6.8133	4.9063	2.24496	0.848514	2.8874	4.3138
	898	2.5116	628.168	C27H27N9O6S;C18H35N3O13;	Na;NaCl_HCOONa;	0.955154	Tezosentan; Chitosan; Chitotriose; D-Glucosaminide	3	0	0	0	0	0	0	0.289	0	0.036125	0.102177	0.0386192	0	0	0	0	0	0	0	0	0	0	0	0	0	0	0	0	0	0	0	0	0	0	0	0	0	0	0	0	3.6484	3.6883
	899	2.512	275.146	C11H24O6;C12H20N4O2;C9H15N5O4;	Na;Na;NH3;	2.54409	Methoxy-Ethoxy-Ethoxy-Ethoxy-Ethoxy-Ethanol; Hexazinone; Hydroxytetrahydrobiopterin; Peroxy-tetrahydrobiopterin; Tetrahydrobiopterin-carbinolamine; Tetrahydroneopterin	3	3.0804	3.008	2.6522	2.7912	2.7449	0	0	0	1.78459	1.48412	0.560946	0	0.8755	0	0	0	0	0.145917	0.357421	0.145917	2.9363	3.525	0	0	0	0	1.07688	1.67866	0.685308	0	0	0	0	0	0	0	0	0	0	0	0
	900	2.5137	123.098				Unidentified	4	0	1.7351	0	0	0	0	0	0	0.216888	0.61345	0.231862	0	0	0	0	0	0	0	0	0	0	0	0	0	0	0	0	0	0	0	0	0	0	0	0	0	0	0	0	0	0
	901	2.5137	658.438	C33H66NO8P;	Na;	3.49311	PC(25:0); PE(28:0)	3	0	0.6174	0	0	0	0	0	0	0.077175	0.218284	0.0825035	0	1.1271	0	0	0	0	0.18785	0.460137	0.18785	0	0	0	0	0	0	0	0	0	0	0	0	0	0	0	0	0	0	0	0	0
	902	2.5146	236.177				Unidentified	4	0	0	0	0	0	0	0	0	0	0	0	0	0	0	0	0	0	0	0	0	0	0	0	0	0	0	0	0	0	0	0	0	0	0	0	0	0	0	0	0	0
	903	2.5154	300.199				Unidentified	4	3.8352	3.1996	3.5575	4.5693	5.8673	0	0	0	2.62861	2.31852	0.87632	3.9028	3.9912	0	0	0	0	1.31567	2.03841	0.832179	5.2076	5.8709	0	0	0	0	1.84642	2.86814	1.17091	3.7737	0	0	3.5179	4.5709	0	0	1.69464	2.13724	0.807802	4.209	2.6086
	904	2.5156	152.109				Unidentified	4	0	1.3189	0	0	0	0	0	0	0.164862	0.466302	0.176245	0	0	0	0	0	0	0	0	0	0	0	0	0	0	0	0	0	0	0	0	0	0	0	0	0	0	0	0	0	0
	905	2.5163	413.149	C21H24N2O4;C20H29ClO4;C18H28N2O4S;C20H28F2O2;C19H24N2O3;C20H22N2O2;C19H27ClO2;C19H26O2;	Na_Na;Na_Na;Na_Na;KCl;HCOOK;Na_HCOONa;Na_HCOONa;NaCl_HCOONa;	3.70329	Baloxine; Dialdehyde; Horhammericine; Mitraphylline; Strictosidine aglycone; Arildone; Amphetamine sulfate; Dextroamphetamine sulfate; Difluoro-hydroxy-methyl-androstenone; Compound V(S); Dilevalol; Labetalol; Akuammicine; Gardneral; Gelsemine; Chloro-hydroxyandrostenone; Chloro-hydroxyandrostenone; Chlorotestosterone; Clostebol; Methylestradiol; Hydroxyandrosta-dienone; androstenedione; nonadeca…	3	0	0	2.065	0	0	0	0	0	0.258125	0.730088	0.275947	0	2.6843	0	0	0	0	0.447383	1.09586	0.447383	0	0	0	0	0	0	0	0	0	0	0	0	0	0	0	0	0	0	0	0	0
	906	2.5165	459.229	C22H38O7;C21H36O5;	Na_Na;Na_HCOONa;	0.217754	Ascorbyl palmitate; methyl-PGF2alpha; methyl-PGE1; Cortol; Carboprost; Carboprost; Cortol; PGF2alpha methyl ester	3	0	0	1.4763	2.1374	0	0	0	0	0.451712	0.854867	0.323109	2.303	0	0	0	0	0	0.383833	0.940196	0.383833	0	0	0	0	0	0	0	0	0	0	0	0	0	0	0	0	0	0	0	1.9693	0
	907	2.5166	527.153	C22H26N2O13;C25H28O11;C26H32N2O3S;C21H30O10;C22H34O7;C22H28N2O5;	H;Na;KCl;HCOOK;NaClx2;NaCl_HCOONa;	0.891582	Metyrapone tartrate; Sergeolide; Urdamycinone F; Daledalin tosylate; Lusitanicoside; Coleonol; Colforsin; Forskolin; Nigakihemiacetal A; 11-O-Demethyl-17-O-deacetylvindoline; Phenbutazone glycerate	3	3.22	3.0778	0	3.267	2.924	0	0	0	1.5611	1.67196	0.63194	0	0	0	0	0	0	0	0	0	4.0543	3.4294	0	0	0	0	1.24728	1.94236	0.792966	0	0	0	0	0	0	0	0	0	0	0	0
	908	2.5168	239.142	C9H19NO3S;	NH3;	0.0418161	Cyclohexyl-Propylsulfonic Acid	3	0	0	0	0	0	0	0	0	0	0	0	0	0	0	0	0	0	0	0	0	3.4765	4.4534	0	0	0	0	1.32165	2.07067	0.845346	0	0	0	0	0	0	0	0	0	0	0	0
	909	2.5168	252.127				Unidentified	4	0	0	0	0	0	0	0	0	0	0	0	0	0	0	0	0	0	0	0	0	0	0	0	0	0	0	0	0	0	0	0	0	0	0	0	0	0	0	0	0	0
	910	2.5176	206.059	C7H9N3O3;C5H14NO4P;C10H11NO;C6H7N3O;	Na;Na;Na_Na;HCOONa;	4.46484	Amino-hydroxylamino-nitrotoluene; Choline phosphate; Dihydro-Methyl-Isoquinolinone; Boschniakine; Indole-ethanol; Isoniazid	3	0	0	0	0	1.469	0	0	0	0.183625	0.51937	0.196303	0	0	0	0	0	0	0	0	0	0	0	0	0	0	0	0	0	0	0	0	0	0	0	0	0	0	0	0	0	0
	911	2.5179	98.0392				Unidentified	4	2.7098	0	0	1.2734	2.9268	0	0	0	0.86375	1.2852	0.485761	1.058	0	0	0	0	0	0.176333	0.431927	0.176333	0	0	0	0	0	0	0	0	0	0	0	0	0.8191	0	0	0	0.117014	0.309591	0.117014	2.3592	0
	912	2.5186	340.065	C14H10O9;C13H19N3OS;C11H13NO7;C9H13N5O4;C9H15N3O3;	NH3;KCl;HCOONa;HCOOK;NaCl_HCOONa;	2.94062	Digallate; Rocastine; Nitrophenyl-Ara; Amino-hydroxy-(erythro-trihydroxypropyl)-dihydropteridine; Dihydroneopterin; Ganciclovir; Theophylline glycinate; Methyl-diazoacetamidohexanoate	3	0	0	0	0.8812	0	0	0	0	0.11015	0.311551	0.117755	0.5124	0	0	0	0	0	0.0854	0.209186	0.0854	0	0	0	0	0	0	0	0	0	0	0	0	0	0	0	0	0	0	0	0	0.2597
	913	2.5193	421.177	C24H24N2O5;C17H35O7P;C24H30O4;C25H28O3;C22H29FO4;C21H30O5;C18H34O6;C20H29ClO3;C23H28O2;	H;K;K;Na_Na;Na_Na;NaCl;KCl;HCOONa;HCOOK;	1.68576	Amtolmetin guacil; Suronacrine maleate; PA(14:0); Dioxochola-trienoic Acid; Ammoresinol; Estradiol benzoate; Fluoro-dihydroxy-methylpregnadienedione; Desoximetasone; Fluocortolone; Fluorometholone; Dihydroxy-oxo-pregnanal; Hydroxycorticosterone; Dihydroxy-pregnanetrione; trihydroxy-oxo-hexanorvitamin D3; Dihydrocortisone; Cortisol; Humulone; Hydrocortisone; humulone; Poststerone; dihydroxy-hydrop…	3	0	0.7282	0	0	0	0	0	0	0.091025	0.257458	0.0973098	0	0	0	0	0	0	0	0	0	0	0	0	0	0	0	0	0	0	0	0	0	0	0	0	0	0	0	0	0	0
	914	2.5199	405.208	C23H32O4S;	H;	3.70178	Hydroxy-mercapto-pregnene-dione acetate	3	0	1.3777	0.9516	0	0	0	0	0	0.291162	0.551024	0.208268	0.881	0	0	0	0	0	0.146833	0.359667	0.146833	0	0	0	0	0	0	0	0	0	0	0	0	0.8227	0	0	0	0.117529	0.310951	0.117529	0.4369	0
	915	2.52	101.044				Unidentified	4	4.212	2.6753	3.116	2.9377	3.2051	0	0	0	2.01826	1.72889	0.653457	0	0	0	0	0	0	0	0	0	5.8757	5.8132	4.4597	0	0	0	2.69143	2.99143	1.22125	0	0	0	0	0	0	0	0	0	0	0.4613	0
	916	2.5201	197.131				Unidentified	4	0	1.8302	2.353	2.7164	2.2174	0	0	0	1.13963	1.24166	0.469302	1.0873	1.1463	0	0	0	0	0.372267	0.577015	0.235565	0	3.4653	0	0	0	0	0.57755	1.4147	0.57755	0	0	0	1.1329	0	0	0	0.161843	0.428196	0.161843	1.7472	0.7381
	917	2.5202	303.162	C18H22O2S;C10H15N5O5;	H;NH3;	0.131952	Hydroxy-Isopropylphenylthio-Isopropylphenol; Vidarabine	3	0	0	0	0	0	0	0	0	0	0	0	0	0	0	0	0	0	0	0	0	0	0	0	0	0	0	0	0	0	0	0	0	0.376	0	0	0	0.0537143	0.142115	0.0537143	0	0
	918	2.5204	469.107	C23H24Cl2N2O3;C20H24O10;C18H23FN4O5;C13H24N2O11;C19H22O8;C20H29ClO3;	Na;Na_Na;KCl;HCOOK;Na_HCOONa;NaClx2;	1.40693	Solabegron; Ginkgolide B; Ginkgolide J; Rutarin; Eperezolid; Macrozamin; Hydroxyvernolide; Chloro-dihydroxy-methylandrostenone	3	0	0	0	6.3543	0	0	0	0	0.794288	2.24658	0.849129	1.4352	0	0	0	0	0	0.2392	0.585918	0.2392	10.0966	0	0	0	0	0	1.68277	4.12192	1.68277	0	0	0	1.0432	0	0	0	0.149029	0.394293	0.149029	0	1.0388
	919	2.5205	128.018				Unmatched Adduct	4	0	0.3763	0	0	0	0	0	0	0.0470375	0.133042	0.0502852	0.4507	0	0	0	0	0	0.0751167	0.183998	0.0751167	2.9388	3.8354	0	0	0	0	1.12903	1.77192	0.723384	0	0	0	0	0	0	0	0	0	0	0	0
	920	2.5207	369.218	C22H28N2O3;C20H30N2O3;C22H25NO3;C23H32O;C19H34O3;	H;Na;NH3;Na_Na;NaCl;	0.758363	Acetylajmaline; Modecainide; Pentamorphone; (Methylcrotonoyl)oxylupanine; Tigloyloxylupanine; Am 580; Pipoxolan; Tamibarotene; Propano-retinal; Methoprene	3	0	0	0	0	0	0	0	0	0	0	0	2.2646	0	0	0	0	0	0.377433	0.924519	0.377433	0	0	0	0	0	0	0	0	0	0	0	0	1.2412	0	0	0	0.177314	0.46913	0.177314	0	0.3372
	921	2.5225	649.107	C28H30O13;C28H28Cl3FN2O4;	KCl;HCOONa;	3.91307	Steffimycin; GW 2433	3	0	0	0	7.2791	0	0	0	0	0.909887	2.57355	0.972711	6.8437	0	0	0	0	0	1.14062	2.79393	1.14062	6.9371	0	0	0	0	0	1.15618	2.83206	1.15618	0	0	0	5.4857	0	0	0	0.783671	2.0734	0.783671	0	6.6976
	922	2.523	415.23	C21H34O8;C21H36BrNO;C18H34O6;	H;NH3;HCOONa;	1.37273	methyl-hydroperoxy-bisepidioxy-eicosadienoate; methyl-epidioxy-dihydroperoxy-eicosatrienoate; Tridihexethyl bromide; 9,10-dihydroxy-13-hydroperoxy-11-octadecenoic acid; 9,10-dihydroxy-Octadecanedioic acid; 9-hydroperoxy-12,13-dihydroxy-10-octadecenoic acid;Sorbitan laurate	3	0	0	0.8652	0	1.3661	0	0	0	0.278913	0.533514	0.201649	2.3956	0	0	0	0	0	0.399267	0.978	0.399267	0	0	0	0	0	0	0	0	0	0	0	0	0	0	0	0	0	0	0	1.4985	0.6866
	923	2.5233	495.12	C22H28O8;C22H31ClO3;C19H28O5S;	KCl;NaClx2;NaCl_HCOONa;	2.1005	Eupacunolin; Eupacunoxin; Eupaformosanin; Eupatocunoxin; Hiyodorilactone A; 12alpha-(Chloromethyl)-12-hydroxy-pregn-4-ene-3,20-dione; 3beta-Hydroxyandrost-5-en-17-one 3-sulfate; Prasterone sulfate; Testosterone sulfate	3	0	0	0	1.3713	0	0	0	0	0.171412	0.484828	0.183248	1.2561	0	0	0	0	0	0.20935	0.512801	0.20935	0	0	0	0	0	0	0	0	0	0	0	0	0.8582	0	0	0	0.1226	0.324369	0.1226	0	0
	924	2.5234	311.173	C19H32N2;	Na;	1.15664	Tedisamil	3	0	0	0	0	0	0	0	0	0	0	0	0	0.3707	0	0	0	0	0.0617833	0.151338	0.0617833	0	0	0	0	0	0	0	0	0	0	0	0	0	0	0	0	0	0	0	0	0
	925	2.5243	129.098				Unidentified	4	0	0	0	2.1462	0	0	0	0	0.268275	0.758796	0.286798	2.1454	0	0	0	0	0	0.357567	0.875856	0.357567	0	0	0	0	0	0	0	0	0	0	0	0	1.9464	0	0	0	0.278057	0.73567	0.278057	2.1011	2.1875
	926	2.5262	210.113	C11H15NO3;C11H12O3;	H;NH3;	1.57058	Hydroxyphenamate; MMDA; Lactophenetide; Propoxur; Tyr-OEt; Carpacin; Dihydroxy-dihydro-hydroxymethylnaphthalene; Isoshinanolone; Myristicin; Sarisan	3	4.906	6.9694	0	0	5.4941	0	0	0	2.17119	3.04992	1.15276	2.8545	0	0	0	0	0	0.47575	1.16534	0.47575	4.2139	8.021	0	0	0	0	2.03915	3.38067	1.38015	3.3959	0	0	0	5.0022	0	0	1.19973	2.10074	0.794006	0	0
	927	2.5262	266.104				Unidentified	4	13.7891	14.086	13.636	12.0719	11.8829	10.6283	7.354	0	10.431	4.75126	1.79581	14.4024	10.7741	11.5478	0	7.3045	0	7.33813	6.11766	2.49752	10.4218	7.1939	6.5882	0	0	0	4.03398	4.60722	1.88089	5.3148	0	0	6.5386	7.5177	0	0	2.7673	3.50976	1.32657	2.7418	8.2378
	928	2.5263	417.245	C19H39O6P;C24H36O3;C20H38O5;	Na;Na_Na;NaCl;	4.38601	(Hexadecenyl)-sn-glycero-3-phosphate; Hydroxycholadienoic Acid; Ethoxyandrostadienol propanoate; Anagestone acetate; Cholacalcioic acid; Nabilone; Dimethoxy-hydroxy-octadecenoic acid; Dihydro PGF-1a; Dihydroxy-ethoxy-octadecenoic acid	3	2.6215	0	1.6764	0	0	0	0	0	0.537238	1.02634	0.387919	0	0	0	0	0	0	0	0	0	0	0	0	0	0	0	0	0	0	0	0	0	0	0	0	0	0	0	0	1.8628	0
	929	2.5266	364.125	C19H26BrNO;C17H17N3O2;C14H21N3O3;C14H23NO2;	H;HCOONa;HCOOK;NaCl_HCOONa;	3.62512	Bibenzonium bromide; GYKI 52895; Oxamniquine; Piroctone	3	0	0	0	0	0	0	0	0	0	0	0	0	0	0	0	0	0	0	0	0	0	0	0	0	0	0	0	0	0	0	0	0	0	0	0	0	0	0	0	0	0
	930	2.5269	203.109	C9H12O4;C7H17N3;	NH3;NaCl;		Hydroxy-oxo-methyloctadienoate; Methoxy-hydroxyphenylethyleneglycol; Antiarol; Carboxy-ethyl-cyclo-hexadiene-diol; Dehydrospermidine	3	0	0	0	0	0	0	0	0	0	0	0	0	0	0	0	0	0	0	0	0	0	0	0	0	0	0	0	0	0	0	0	0	0.3822	0	0	0	0.0546	0.144458	0.0546	6.8716	0
	931	2.527	695.06				Isotope	4	0	0	0	0	0	0	0	0	0	0	0	0	0	0	0	0	0	0	0	0	0	0	0	0	0	0	0	0	0	0	0	0	0	0	0	0	0	0	0	2.6296	0
	932	2.5274	63.6727				Unidentified	4	0	0	0	0.4817	0.3401	0	0	0	0.102725	0.193938	0.0733017	0.1371	0	0	0	0	0	0.02285	0.0559708	0.02285	0	0	0	0	0	0	0	0	0	0	0	0	0	0	0	0	0	0	0	0.2516	0
	933	2.5275	958.419	C49H65N3O15;C45H73NO16;	Na;KCl;	1.09554	Rifamycin Cgp 4832; Josamycin propionate; Solasonine	3	0	0	0	0	0	0	0	0	0	0	0	0	0	0	0	0	0	0	0	0	0	0	0	0	0	0	0	0	0	0	0	0	0	0	0	0	0	0	0	0.48	0.091
	934	2.5278	166.086	C9H11NO2;C9H8O2;	H;NH3;	0.301048	Phenylalanine; Pyridyl-butanoate; Aminohydrocinnamic Acid; Tyrosinal; Hydroxy-indanone; Isochromanone; Hydroxycinnamyl aldehyde; coumaraldehyde; Dihydrocoumarin; trans-Cinnamate	3	0	0	7.2361	9.5716	0	0	0	0	2.10096	3.93998	1.48917	4.334	0	0	0	0	0	0.722333	1.76935	0.722333	13.9952	0	0	0	0	0	2.33253	5.71352	2.33253	0	0	0	0	0.0886	0	0	0.0126571	0.0334877	0.0126571	3.0721	0
	935	2.5281	760.38	C36H51N6O9P;C34H62NO10P;	NH3;HCOOK;	2.5645	Carbobenzoxy-Pro-Lys-Phe-Y(Po2)-Ala-Pro-Ome; PS (28:2)	3	3.6773	2.9045	0	2.8221	3.2996	0	0	0	1.58794	1.71705	0.648985	3.2702	3.0022	0	0	0	0	1.0454	1.62174	0.662074	0	0	0	0	0	0	0	0	0	4.3149	4.9117	4.2138	6.257	5.4315	0	6.2779	4.48669	2.14671	0.811379	3.2115	4.4349
	936	2.5283	868.364				Multiply Charged ion - not identified	4	6.4122	4.6885	5.0665	5.5085	7.8703	5.2208	0	0	4.34585	2.85903	1.08061	6.0924	6.9683	5.7271	0	0	0	3.1313	3.45381	1.41001	7.742	8.3214	0	0	0	0	2.67723	4.1516	1.69488	5.5553	0	0	5.7872	6.7577	0	0	2.58574	3.24595	1.22685	3.4533	4.4101
	937	2.5284	370.083	C16H14F3N3O2S;C18H18ClNO4;C16H17N3O4S;C13H21N3O5S;C18H17NO4;C16H19N3;	H;Na;Na;K;NaCl;NaClx2;	3.37763	Lansoprazole; Clanobutin; Cefalexin; Cephalexin; Aminodi(Ethyloxy)Ethylaminocarbonylbenzenesulfonamide; 5-Methoxy-1,2-Dimethyl-3-(Phenoxymethyl)Indole-4,7-Dione; Acronidine; Actinodaphnine; Cularicine; IC261; Fenapanil	3	0	0	0	0	0	0	0	0	0	0	0	0.4742	0	0	0	0	0	0.0790333	0.193591	0.0790333	2.6133	0	0	0	0	0	0.43555	1.06688	0.43555	0	0	0	0	0	0	0	0	0	0	0	0.2034
	938	2.5288	408.173	C20H20F2N2O4;C15H18N8O5;C20H31NO2S;C16H25N3O5;C19H27NO3;	NH3;NH3;NaCl;HCOONa;Na_HCOONa;	2.10694	Fluparoxan; Regadenoson; Cetiedil; Xamoterol; Glycopyrrolate; Nateglinide; Protoemetine; Tetrabenazine	3	0	0	0	0.8347	0	0	0	0	0.104337	0.295111	0.111541	0	0	0	0	0	0	0	0	0	0	0	0	0	0	0	0	0	0	0	0	0	0	0	0	0	0	0	0	1.6664	0
	939	2.5288	744.78				Unidentified	4	0	0	0.3715	0	1.7477	0	0	0	0.2649	0.613083	0.231723	0	1.4404	0	0	0	0	0.240067	0.588041	0.240067	0.1626	0	0	0	0	0	0.0271	0.0663812	0.0271	0	0	0	0	0	0	0	0	0	0	0	0
	940	2.5291	117.064				Unidentified	4	3.1076	0	1.9827	0	0	0	0	0	0.636288	1.21593	0.459578	0	0	0	0	0	0	0	0	0	0	0	0	0	0	0	0	0	0	0	0	0	0	0	0	0	0	0	0	0.5182	0
	941	2.5293	200.094				Unidentified	4	4.8353	4.1359	5.3516	3.9881	4.5506	0	0	0	2.85769	2.4026	0.908096	5.1915	3.8574	0	0	0	0	1.50815	2.3742	0.969263	4.326	3.4873	0	0	0	0	1.30222	2.03474	0.830681	0	0	0	0.8871	3.3201	0	0	0.601029	1.24374	0.47009	0	4.2311
	942	2.5295	355.189	C22H26O4;C18H28N4O;	H;K;	1.80185	Dimethoxyestra-pentaene-carboxylic acid methyl ester; Hexestrol diacetate; Seratrodast; Tephrowatsin A; Butalamine	3	0	0	0	0	0	0	0	0	0	0	0	0	0	0	0	0	0	0	0	0	2.8822	0	0	0	0	0	0.480367	1.17665	0.480367	0	0	0	0	0	0	0	0	0	0	0	0.999
	943	2.5296	233.063				Unidentified	4	0	0	0	4.9063	0	0	0	0	0.613287	1.73464	0.655632	5.3069	0	0	0	0	0	0.884483	2.16653	0.884483	0	0	0	0	0	0	0	0	0	0	0	0	5.4395	0	0	0	0.777071	2.05594	0.777071	0	6.6471
	944	2.5297	436.18	C12H16ClN3O4S3;C10H12N5O6PS;C13H15Cl2NO4;	K;KCl;NaClx2;	4.19761	Methalthiazide; Guanosine-2',3'-Cyclophosphorothioate; Cetophenicol	3	0	0	0	0	0	0	0	0	0	0	0	0	0	0	0	0	0	0	0	0	4.9874	4.2449	0	0	0	0	1.53872	2.39531	0.977879	0	0	0	0	0	0	0	0	0	0	0	0
	945	2.5303	554.234	C28H37NO9;	Na;	3.3199	Harringtonine	3	3.4194	0	0	2.6427	3.0496	0	0	0	1.13896	1.58557	0.599291	0	2.1329	0	0	0	0	0.355483	0.870753	0.355483	4.5603	3.4355	0	0	0	0	1.33263	2.09492	0.855249	0	0	0	0	2.838	0	0	0.405429	1.07266	0.405429	0	0
	946	2.5304	198.116				Unidentified	4	0	2.2099	1.7459	0	0	0	0	0	0.494475	0.92395	0.34922	0	0	0	0	0	0	0	0	0	0	0	0	0	0	0	0	0	0	0	0	0	0	0	0	0	0	0	0	0	0
	947	2.5305	713.192	C31H38O11;	NaCl_HCOONa;	0.5889	Baccatin III	3	0	0	0	1.0192	0.6696	0	0	0	0.2111	0.401893	0.151901	0.4786	0	0	0	0	0	0.0797667	0.195388	0.0797667	0	0	0	0	0	0	0	0	0	0	0	0	0.5022	0	0	0	0.0717429	0.189814	0.0717429	0	0.5276
	948	2.5306	385.189				Unidentified	4	0	0	0	0	0	0	0	0	0	0	0	1.6691	0	0	0	0	0	0.278183	0.681407	0.278183	1.4902	0	0	0	0	0	0.248367	0.608372	0.248367	0	0	0	1.6334	0	0	0	0.233343	0.617367	0.233343	0	4.0024
	949	2.5308	379.126	C17H16F6N2O;C15H24N4O2S2;C20H24N2OS;C18H20NO3PS;C16H31BrO2;C19H25FO2;C16H20N2O3;	H;Na;K;NH3;Na_Na;KCl;Na_HCOONa;	0.31652	Mefloquine; Prosultiamine; Cinanserin; Lucanthone; Propiomazine; Fostedil; 16-bromo-hexadecanoic acid; 2-bromo-hexadecanoic acid; 3-bromohexadecanoic acid; 16alpha-Fluoroandrost-4-ene-3,17-dione; 16beta-Fluoroandrost-4-ene-3,17-dione; indole-3-acetyl-leu;Methyl 2-(4-isopropyl-4-methyl-5-oxo-2-imidazolin-2-yl)-p-toluate; Methyl 6-(4-isopropyl-4-methyl-5-oxo-2-imidazolin-2-yl)-m-toluate	3	0	1.3448	1.5422	0	1.2559	0	0	0	0.517863	0.718997	0.271755	0	0	0	0	0	0	0	0	0	0	0	0	0	0	0	0	0	0	0	0	0	2.8399	0	0	0	0.4057	1.07338	0.4057	0.3753	0
	950	2.5308	922.765				Unidentified	4	0	0.3807	0.4302	0	0	0	0	0	0.101362	0.188153	0.071115	0	0	0	0	0	0	0	0	0	0	0	0	0	0	0	0	0	0	0	0	0	0	0	0	0	0	0	0	0	0
	951	2.5315	421.092	C21H18O8;C14H23N2O7P;C20H16O6;C11H22O11;C14H20N6O2;C18H24O4;C18H18N2O2;	Na;NaCl;HCOONa;Na_HCOONa;NaClx2;NaClx2;NaCl_HCOONa;	4.86831	Auramycinone; Dihydro-NAME; [Phosphono-Pyridoxyl]-Isoleucine; Vitamin B6 Complexed with 2-Amino-Hexanoic Acid; Savinin; Lactitol; Discadenine; dihydroxy estradiol; [Ethyl-(methoxyphenyl)-pyrazol-yl]phenol	3	0	0	0	1.1606	0	0	0	0	0.145075	0.410334	0.155092	0.2661	0	0	0	0	0	0.04435	0.108635	0.04435	0	0	0	0	0	0	0	0	0	0	0	0	0.3421	0	0	0	0.0488714	0.129302	0.0488714	0	0.3957
	952	2.5315	569.316				Unidentified	4	0	0	0.385	0	0	0	0	0	0.048125	0.136118	0.0514478	0	0.9259	0	0	0	0	0.154317	0.377997	0.154317	0	0	0	0	0	0	0	0	0	0	0	0	0	0	0	0	0	0	0	0	0
	953	2.5317	970.445	C47H75NO17;C41H65N15O9;	Na_Na;NaCl;	0.783121	Nystatin; Nystatin A1; kinetensin 1-7	3	2.7161	0.5943	0.2468	0	0.7088	0	0	0	0.53325	0.927274	0.350476	0	0	0	0	0	0	0	0	0	0	0.304	0	0	0	0	0.0506667	0.124107	0.0506667	0	0	0	0	0	0	0	0	0	0	0	0
	954	2.5319	480.203	C21H39ClNO4P;C23H31N7;C22H37NO3;C21H36ClNO;	Na_Na;KCl;NaClx2;NaCl_HCOONa;	0.312369	Clofilium phosphate; 2-[Trans-(4-Aminocyclohexyl)Amino]-6-(Benzyl-Amino)-9-Cyclopentylpurine; EpETrE-EA; Leukotriene B4 dimethylamide; Tridihexethyl chloride	3	3.5541	2.741	3.2649	2.7278	3.6215	0	0	0	1.98866	1.67853	0.634424	0	0	0	0	0	0	0	0	0	4.966	4.879	4.347	0	0	0	2.36533	2.59975	1.06134	2.7385	0	0	0	0	0	0	0.391214	1.03506	0.391214	2.2072	0
	955	2.5329	775.362				Unidentified	4	0	0	0	1.2517	0	0	0	0	0.156463	0.442543	0.167265	0	0	0	0	0	0	0	0	0	0	0	0	0	0	0	0	0	0	0	0	0	0	0	0	0	0	0	0	0	0
	956	2.5332	243.14				Unidentified	4	1.6129	0	0	0	0	0	0	0	0.201613	0.570246	0.215533	0	0	0	0	0	0	0	0	0	0	0	0	0	0	0	0	0	0	0	0	0	3.5422	4.0127	0	0	1.07927	1.8482	0.698556	3.9088	3.5097
	957	2.5338	86.0975				Unidentified	4	5.2664	4.373	4.2082	3.4483	3.802	0	0	0	2.63724	2.24477	0.848442	2.5368	3.0709	0	0	0	0	0.934617	1.45772	0.595112	3.9596	0	0	0	0	0	0.659933	1.6165	0.659933	0	0	0	3.5465	3.2112	0	0	0.965386	1.65155	0.624227	2.1804	2.5836
	958	2.5339	710.492				Unidentified	4	0	0	0	1.1303	0	0	0	0.1578	0.161013	0.395525	0.149494	0	0	0	0	0	0	0	0	0	0	0	0	0	0	0	0	0	0	0	0	0	0	0	0	0	0	0	0	3.4642	0
	959	2.5341	597.188	C30H26O12;C27H29NO10;C25H31N3O6;C25H32ClN5O2;	NH3;HCOONa;NaCl_HCOONa;NaCl_HCOONa;		Proanthocyanidin; Epicatechin-ent-epicatechin; Pelargonidin(-coumaroyl)glucoside; Procyanidin B4; Daunorubicin; Esorubicin; Methysergide maleate; Nefazodone	3	0	1.9616	1.7956	5.933	0	0	0	0	1.21128	2.08858	0.789408	5.619	0	0	0	0	0	0.9365	2.29395	0.9365	0	0	0	0	0	0	0	0	0	0	0	0	0	0	0	0	0	0	0	2.3445	0
	960	2.5346	844.988				Unidentified	4	0	0	0	0	0	0	0.1445	0	0.0180625	0.0510885	0.0193096	0	1.3138	0	0	0	0	0.218967	0.536357	0.218967	0	0	0	0	0	0	0	0	0	1.5565	0	0	0	1.5676	0	0	0.4463	0.762209	0.288088	0	0
	961	2.5348	120.082				Unidentified	4	0	2.4207	0	5.4064	0	0	0	0	0.978387	1.97957	0.748209	3.1168	0	0	0	0	0	0.519467	1.27243	0.519467	7.5749	0	0	0	0	0	1.26248	3.09244	1.26248	0.7744	0	0	2.8172	1.0596	0	0	0.664457	1.04631	0.395467	0	3.3807
	962	2.5354	931.608				Unidentified	4	0	0	0	0.4766	0	0	0	0	0.059575	0.168504	0.0636884	0	0.3972	0	0	0	0	0.0662	0.162156	0.0662	0	0	0	0	0	0	0	0	0	0	0	0	0	0	0	0	0	0	0	0	0
	963	2.5357	201.059	C3H8N4O2;	HCOONa;	2.58631	Methylenediurea	3	0	0	0	0	0	0	0	0	0	0	0	0	0	0	0	0	0	0	0	0	0	0	0	0	0	0	0	0	0	0	0	0	0.7041	0	0	0	0.100586	0.266125	0.100586	0	0
	964	2.536	398.21	C19H28N2O4S;C20H35NO2S;	NH3;Na_Na;	2.2601	[Sulfanylheptanoyl]-Phe-Ala; Tipropidil	3	0	0	0	0	0	0	0	0	0	0	0	0	0	0	0	0	0	0	0	0	1.4566	0	0	0	0	0	0.242767	0.594654	0.242767	0	0	0	0.603	0	0	0	0.0861429	0.227913	0.0861429	0	0.6815
	965	2.5365	658.327				Unidentified	4	0	1.4282	0	1.4658	0	0	0	0	0.36175	0.669906	0.253201	0.5389	0	0	0	0	0	0.0898167	0.220005	0.0898167	0	0	0	0	0	0	0	0	0	0	0	0	0	0	0	0	0	0	0	0.5204	0
	966	2.5369	302.046	C12H13Cl2N3O2;C10H17NO5S;C12H10Cl2N2O2;C12H11N5S;C13H13N3O;C9H15NO3S;C13H15N;	H;K;NH3;Na_Na;KCl;HCOOK;NaClx2;	1.98646	BAS 110; Etamsylate; DTP; Amino-(benzylthio)purine; (Cyclopropyl-1h-Pyrazolyl)Benzamide; (Mercapto-Methyl-Propionyl)-Pyrrolidine-Carboxylic Acid; Acidomycin; Captopril; Methyl-Propargyl-Aminoindan	3	0	0	0	0	0	0	0	0	0	0	0	0	0	0	0	0	0	0	0	0	0	0	0	0	0	0	0	0	0	0	0	0	0	0	0	0	0	0	0	0	0
	967	2.5373	351.156	C20H24O4;C17H28O5;C19H22N4;C19H22O2;C16H26O3;	Na;K;Na_Na;HCOONa;HCOOK;	1.19605	Crocetin; Estra-trien-one-oxyacetic acid; GC-1; Vernoflexin; Artemotil; Corrinoid; Hydroxy-methylestra-tetraen-one; Prenyldihydropinosylvin; Diethylstilbestrol monomethyl ether; Miltirone; Epoxy-trimethyltrideca-dienoic acid; Dinor-dihydro-oxo-phytoenoic acid; Hydroxy-hexadeca-trienoate; Juvabione; Juvenile hormone III; Tetranor-HETE	3	0	0	0	0	0	0	0	0	0	0	0	0	0	0	0	0	0	0	0	0	0	0	0	0	0	0	0	0	0	0	0	0	0	0	0	0	0	0	0	0	0
	968	2.5378	873.555				Unidentified	4	2.829	2.3331	0	0	2.1761	0	0	0	0.917275	1.279	0.483416	0	0	0	0	0	0	0	0	0	0	0	0	0	0	0	0	0	0	0	0	0	0	3.461	0	0	0.494429	1.30814	0.494429	0	0
	969	2.5379	855.073				Unidentified	4	0	0	0	1.4532	0	0	0	0	0.18165	0.513784	0.194192	2.067	0	0	0	0	0	0.3445	0.843849	0.3445	0	0	0	0	0	0	0	0	0	0	0	0	4.3242	0	0	0	0.617743	1.63439	0.617743	3.0936	0
	970	2.539	798.808				Unidentified	4	0	0	0	1.077	0	0	0	0	0.134625	0.380777	0.14392	0	0	0	0	0	0	0	0	0	0	0	0	0	0	0	0	0	0	0	0	0	0	0	0	0	0	0	0	0.3032	0
	971	2.5395	317.178	C10H13N5O6;C12H16N4O2;	NH3;HCOONa;	3.7525	Hydroxyguanosine; Histidylproline diketopiperazine	3	0	0	0	0	0	0	0	0	0	0	0	0	0	0	0	0	0	0	0	0	0	0	0	0	0	0	0	0	0	0	0	0	0	0	0	0	0	0	0	0	0
	972	2.5399	466.137	C21H25N5O6;C24H27N3O4;C24H26FN3O2;C18H28N3O5P;	Na;Na_Na;NaCl;HCOONa;	4.82657	Dideazatetrahydrofolic Acid; Lometrexol; LY249543; Fenpyroximate; Fezolamine fumarate; Metrenperone; Enazadrem phosphate	3	0	0	0	0.5768	0	0	0	0	0.0721	0.20393	0.0770781	2.0695	0	0	0	0	0	0.344917	0.84487	0.344917	1.0145	0	0	0	0	0	0.169083	0.414168	0.169083	0	0	0	2.562	0	0	0	0.366	0.968345	0.366	0	1.3046
	973	2.5404	470.255	C21H41N3O6;C20H44NO6P;C20H41NO3;	K;Na_Na;NaCl_HCOONa;	0.744267	Sphingofungin A; PC(O-12:0/0:0); PC(O-6:0/O-6:0); Cedefingol; Monoethanolamine oleate	3	0	0	0	0	0	0	0	0	0	0	0	1.7661	0	0	0	0	0	0.29435	0.721007	0.29435	1.2231	0	0	0	0	0	0.20385	0.499328	0.20385	0	0	0	1.1337	0	0	0	0.161957	0.428498	0.161957	0	1.3878
	974	2.5414	150.061				Unidentified	4	0	2.2002	1.4252	0	0	0	0	0	0.453175	0.864303	0.326676	0	0	0	0	0	0	0	0	0	0	0	0	0	0	0	0	0	0	0	0	0	0	0	0	0	0	0	0	0	0
	975	2.5419	502.253	C24H40NO8P;C29H37NO5;C26H41NO6;C26H32N2O7;C23H35N3O5;C26H37NO3;	H;Na;K;NH3;HCOONa;Na_HCOONa;	3.46438	PC(16:4); Lythramine; Edifolone acetate; Bopindolol malonate; N-Formyl-norleucyl-leucyl-phenylalanyl-methylester; Fesoterodine	3	0	0	0	0	0	0	0	0	0	0	0	2.0065	0	0	0	0	0	0.334417	0.81915	0.334417	1.4634	0	0	0	0	0	0.2439	0.597431	0.2439	0	0	0	1.8141	0	0	0	0.259157	0.685665	0.259157	0	2.1859
	976	2.542	525.167	C18H34N2O13;C28H26N4O3;C23H33ClO6;C19H26N6O6;	K;NaCl;HCOOK;Na_HCOONa;	2.74198	Glucosylgalactosyl hydroxylysine; Staurosporine; punaglandin 8; Xanthinol niacinate	3	0	0	0	0.5244	0	0	0	0	0.06555	0.185403	0.0700759	0.2308	0	0	0	0	0	0.0384667	0.0942237	0.0384667	0	0	0	0	0	0	0	0	0	0	0.1745	0	0	0	0	0	0.0249286	0.0659548	0.0249286	0	0
	977	2.5432	473.234	C26H36O5;C22H38O7;C20H38N4O4;C27H32O3;C24H36O4;C25H34O3;	Na_Na;NaCl;KCl;HCOONa;HCOOK;Na_HCOONa;	1.75391	Dicirenone; Ascorbyl palmitate; Dimorpholamine; Estradiol-17-phenylpropionate; 12alpha-Hydroxy-3-oxo-5beta-chol-9(11)-en-24-oic Acid; 12alpha-Hydroxy-3-oxochol-4-en-24-oic Acid; 12beta-Hydroxy-3-oxochol-4-en-24-oic Acid; 1alpha-hydroxy-25,26,27-trinorvitamin D3 24-carboxylic acid; Dioxo-cholanoic Acid; Dihydroxy-choladienoic Acid; Hydroxy-oxo-cholenoic Acid; Bolandiol dipropionate; C25-Allenic-ap…	3	0	0	0	2.0438	0	0	0	0	0.255475	0.722592	0.273114	2.2069	0	0	0	0	0	0.367817	0.900963	0.367817	1.0929	0	0	0	0	0	0.18215	0.446175	0.18215	0	0	0	1.7124	0	0	0	0.244629	0.647226	0.244629	0	1.594
	978	2.5432	999.69				Unidentified	4	0.2733	0	0	0.7499	0	0	0	0	0.1279	0.268907	0.101637	0.8507	0	0	0	0	0	0.141783	0.347297	0.141783	0	0	0	0	0	0	0	0	0	0	0	0	0	0	0	0	0	0	0	0	0
	979	2.544	626.223	C27H43NO8;C25H42NO7P;	NaClx2;NaCl_HCOONa;	0.159687	Acetylbrowniine; Colforsin daropate; Germine; Tricornine; Veracevine; LysoPE(20:5)	3	0	0.7957	0	0	0	0	0	0	0.0994625	0.281322	0.10633	0.5894	0	0	0	0	0	0.0982333	0.240622	0.0982333	0	0	0	0	0	0	0	0	0	0	0	0	0.5228	0	0	0	0.0746857	0.1976	0.0746857	0	0
	980	2.5445	227.142				Unidentified	4	0	0	0.9371	0.7691	0	0	0	0	0.213275	0.397453	0.150223	0	0	0	0	0	0	0	0	0	0	0	0	0	0	0	0	0	0	0	0	0	0.9349	0	0	0	0.133557	0.353359	0.133557	0	1.1975
	981	2.5448	689.913				Unidentified	4	0	0	0	1.6902	0	0.2784	0	0	0.246075	0.591591	0.2236	2.6593	0	0	0	0	0	0.443217	1.08565	0.443217	0	0	0	0	0	0	0	0	0	0	0	0	3.9827	0	0	0	0.568957	1.50532	0.568957	2.1441	2.4311
	982	2.5453	296.102	C11H13N5O5;C14H15N3O3;C9H15N2O6P;C13H13N3O;C8H16FN3O2;C10H19NO;	H;Na;NH3;HCOONa;Na_HCOONa;NaCl_HCOONa;	0.270179	Azidamfenicol; Naphazoline nitrate; Pyrimidine deoxynucleotide; (Cyclopropyl-1h-Pyrazolyl)Benzamide; Fluoro-Ethanimidoyl-Lysine; Lupinine; Nitramine	3	0	0	0	1.7311	0	0	0	0	0.216388	0.612036	0.231328	1.2583	0	0	0	0	0	0.209717	0.513699	0.209717	0	0	0	0	0	0	0	0	0	0	0	0	0	0	0	0	0	0	0	1.3304	0
	983	2.5456	822.065	C21H32N7O18P3;	NaCl;	1.38675	Hydroxy-tetrahydronicotinamide-adenine dinucleotide-phosphate;	3	0	0	1.0947	0	0	0	0	0	0.136838	0.387035	0.146285	0	0	0	0	0	0	0	0	0	0	0	0	0	0	0	0	0	0	0	0	0	0	0	0	0	0	0	0	0	0
	984	2.5464	518.148	C29H27NO4S2;C25H30ClNO5;C23H26F3N3S;C21H34BrNO3;C16H29N3O8;	H;NaCl;HCOOK;Na_HCOONa;NaCl_HCOONa;	3.24232	Tipepidine hibenzate; Clemastine fumarate; Cyclophenazine; Oxyphenonium bromide; Diethylcarbamazine citrate	3	0	0	0	0	0	0	0	0	0	0	0	0	0	0	0	0	0	0	0	0	0	0	0	0	0	0	0	0	0	0	0	0	0	0	0	0	0	0	0	0.1443	0
	985	2.5464	877.925				Unidentified	4	0	0	0	2.3707	0	0	0	0	0.296337	0.838169	0.316798	1.5618	0	0	0	0	0	0.2603	0.637602	0.2603	0	0	0	0	0	0	0	0	0	0	0	0	1.4426	0	0	0	0.206086	0.545252	0.206086	0	1.2823
	986	2.5468	274.098	C15H15NO4;C15H12O4;C13H17N3;C10H21N3O;	H;NH3;NaCl;KCl;	0.401301	Dihydro-(methoxyphenethyl)-oxonicotinic acid; Thyronine; Pinocembrin; Dihydroxypterocarpan; Dihydroxyflavanone; Dihydrodaidzein; Hydrangenol; Isoliquiritigenin; Liquiritigenin; Pinocembrin; Pinocembrin chalcone; Tramazoline; Diethylcarbamazine	3	0	0	0	0	0	0	0	0	0	0	0	0	0	0	0	0	0	0	0	0	0	0	0	0	0	0	0	0	0	0	0	0	1.7614	0	0	0	0.251629	0.665747	0.251629	0.7374	1.6971
	987	2.547	728.243				Unidentified	4	0	2.9964	0	0	0.7307	0	0	0	0.465888	1.05397	0.398362	2.8917	0	0	0	0	0	0.48195	1.18053	0.48195	0.3632	0	0	0	0	0	0.0605333	0.148276	0.0605333	0	0	0	3.0373	3.5436	0	0	0.940129	1.61221	0.60936	2.3434	0
	988	2.5471	190.09				Unidentified	4	8.3759	7.3257	6.944	8.8395	9.205	0	0	0	5.08626	4.27533	1.61592	3.0699	0	0	0	0	0	0.51165	1.25328	0.51165	19.0811	15.8956	0	0	0	0	5.82945	9.08695	3.70973	0	0	0	2.165	3.162	0	0	0.761	1.33114	0.503124	1.6774	0
	989	2.5471	627.174	C18H38N4O15S;C26H34N2O13;	Na_Na;Na_Na;	2.69462	Kanamycin sulfate; 4-Methylumbelliferyl Chitobiose	3	0	0	0	0	0	0	0	0	0	0	0	0.5298	0	0	0	0	0	0.0883	0.21629	0.0883	1.3845	0	0	0	0.3802	0	0.294117	0.555403	0.226742	0	0	0	0.3903	0	0	0	0.0557571	0.14752	0.0557571	0	0
	990	2.5474	132.013				Unidentified	4	0	0	0	0	0.8953	0	0	0	0.111912	0.316536	0.119639	0	0	0	0	0	0	0	0	0	0	0	0	0	0	0	0	0	0	0	0	0	0	0	0	0	0	0	0	0.5165	0
	991	2.548	794.179				Unidentified	4	0	0	2.108	0	0	0	0	0	0.2635	0.745291	0.281693	0	0	0	0	0	0	0	0	0	0.2051	0	0	0	0	0	0.0341833	0.0837317	0.0341833	0	0	0	0	3.9713	0	0	0.567329	1.50101	0.567329	0	0
	992	2.5488	72.0462				Unidentified	4	0	0	0	1.9803	0	0	0	0	0.247537	0.700142	0.264629	1.234	0	0	0	0	0	0.205667	0.503778	0.205667	0	0	0	0	0	0	0	0	0	0	0	0	0	0	0.6183	0	0.0883286	0.233695	0.0883286	0	1.5961
	993	2.5502	996.303				Unidentified	4	0	0	0.6742	3.0226	1.576	0	0	0	0.6591	1.10835	0.418918	4.0502	0	0	0	0	0	0.675033	1.65349	0.675033	0	0	0	0	0	0	0	0	0	0	0	0	3.5575	0	0	0	0.508214	1.34461	0.508214	3.06	0
	994	2.5516	855.24	C42H66O15;C39H74O11P2;C41H64O13;	Na_Na;KCl;Na_HCOONa;	0.876771	Azukisaponin III; Dianoside A; PPA(36:2); Digitoxin	3	0	0	0	0	0	0	0	0	0	0	0	1.3903	0	0	0	0	0	0.231717	0.567588	0.231717	0.8932	0	0	0	0.1901	0	0.18055	0.357311	0.145871	0	0	0	4.1812	0	0	0	0.597314	1.58035	0.597314	0	3.1993
	995	2.5517	119.039				Unidentified	4	0	0	0	0	0	0	0	0	0	0	0	0	0	0	0	0	0	0	0	0	0	0	0	0	0	0	0	0	0	0	0	0	0	0	0	0	0	0	0	0	0
	996	2.5519	821.744				Unidentified	4	2.6988	0	0	0	2.8361	0	0	0	0.691863	1.28161	0.484401	0	3.2178	0	0	0	0	0.5363	1.31366	0.5363	0	0	0	0	0	0	0	0	0	0	0	0	4.2732	3.8871	0	0	1.16576	1.99403	0.753671	0	3.0573
	997	2.5526	86.0073				Unidentified	4	0	0.6799	0	0.7821	1.5668	0	0	0	0.3786	0.583353	0.220487	0	0	0	0	0	0	0	0	0	3.437	0	0	0	0	0	0.572833	1.40315	0.572833	0	0	0	0	0	0	0	0	0	0	0	0
	998	2.553	383.224	C22H27N3O2;	NH3;	2.47884	Caroverine	3	0	0	0	0	0	0	0	0	0	0	0	0	0	0	0	0	0	0	0	0	0	0	0	0	0	0	0	0	0	0	0	0	0	0	0	0	0	0	0	0	0
	999	2.5533	883.462	C46H66N4O13;	H;	4.62949	Ulapualide A	3	0	0	0	1.0915	0	0	0	0	0.136437	0.385904	0.145858	0	0	0	0	0	0	0	0	0	0	0	0	0	0	0	0	0	0	0	0	0	0	0	0	0	0	0	0	1.4671	0
	1000	2.5536	712.078				Unidentified	4	0	0.8065	0.9695	0	1.0105	0	0	0	0.348313	0.484165	0.182997	0	2.946	0	0	0	0	0.491	1.2027	0.491	0	0	0	0	0	0	0	0	0	0	0	0	4.0861	0	0	0	0.583729	1.5444	0.583729	0	0
	1001	2.5538	360.023	C16H16ClNO2S;C8H16NO9P;C12H9N3O5;C12H12ClNO4;C8H13N5O4;C12H11NO4;	K;NaCl;HCOOK;Na_HCOONa;NaClx2;NaCl_HCOONa;	0.611074	Clopidogrel; Acetyl-galactosamine-phosphate; Nifuroxazide; Eclazolast; Taribavirin; Hydroxy-oxo-(aminophenyl)-hexa-dienoate; Casimiroin	3	0	0	0	0	0	0	0	0	0	0	0	0.2285	0	0	0	0	0	0.0380833	0.0932847	0.0380833	0	0	0	0	0	0	0	0	0	0	0	0	0	0	0	0	0	0	0	0	0.1445
	1002	2.5551	212.126	C8H17NO;	HCOONa;	3.72419	Hygroline; Methyl-Hexyl-Formamide; Butyro-betaine; Heptylformamide; Pseudoconhydrine; Valnoctamide;Valpromide	3	1.2757	0	3.021	2.9564	0	0	0	0	0.906637	1.35848	0.513456	0	0	0	0	0	0	0	0	0	2.8787	0	0	0	0	0	0.479783	1.17522	0.479783	0	0	0	0	0	0	0	0	0	0	0	0
	1003	2.5552	714.818				Unidentified	4	4.1098	3.799	6.7789	0	0	0	0	0	1.83596	2.68089	1.01328	0	0.7482	0	0	0	0	0.1247	0.305451	0.1247	0	0	0	0	0	0	0	0	0	0	0	0	3.3559	4.9494	0	0	1.18647	2.07784	0.785351	8.0694	5.9944
	1004	2.5554	262.113				Unidentified	4	0	0.7677	1.1228	0	0.9805	0	0	0	0.358875	0.504422	0.190654	0	0	0	0	0	0	0	0	0	0	0	0	0	0	0	0	0	0	0	0	0	0	0	0	0	0	0	0	0	0
	1005	2.5556	659.835				Unidentified	4	0	0	1.0711	0	0.9306	0	0	0	0.250213	0.464823	0.175686	0.3199	0	0	0	0	0	0.0533167	0.130599	0.0533167	0.4513	0	0	0	0	0	0.0752167	0.184242	0.0752167	3.5145	0	0	0.6222	3.415	0	0	1.07881	1.64591	0.622097	3.5957	0
	1006	2.5558	549.211	C26H31Cl2N5O3;C24H42O7P2;C29H28N4O3;C23H38O7S;C26H40O5;	NH3;Na_Na;HCOONa;Na_HCOONa;NaClx2;	3.73262	Terconazole; SR 12813; PD 123177; Sulfodeoxycholic acid; dihydroxy-oxo-oxavitamin D3; Latanoprost	3	0	0	0	0	0	0	0	0	0	0	0	0	0	0	0	0	0	0	0	0	0	0	0	0	0	0	0	0	0	0	0	0	0	0	0	0	0	0	0	1.175	0.495
	1007	2.5559	922.864				Unidentified	4	0	0.3179	0	0	0.534	0	0	0	0.106488	0.205461	0.077657	0.5824	0	0	0	0	0	0.0970667	0.237764	0.0970667	0	0	0	0	0	0.4183	0.0697167	0.17077	0.0697167	0	0	0	1.615	0	0	0	0.230714	0.610413	0.230714	0.7357	1.4766
	1008	2.556	491.095	C22H22O10;C23H18O8;C20H22O9;C21H20O8;C16H20N4O6;C21H20N2O4;	Na_Na;HCOONa;HCOOK;Na_HCOONa;NaCl_HCOONa;NaCl_HCOONa;	4.88705	Maackiain-O-glucoside; Biochanin A-beta-D-glucoside; Glycitin; Obtusifolin-glucoside; Physcion-glucoside; Trifolirhizin; Tetracenomycin A2; Astringin; Trichocarpin; 2-[4-(Acetyloxy)phenyl]-5,6,7,8-tetramethoxy-4H-1-benzopyran-4-one; 4'-Demethylpodophyllotoxin; O-beta-D-glucosyl-hydroxyflavone; Peltatin; Flavonol-O-D-glucoside; Isoflavone 7-O-D-glucoside; Diaziquone; Tyloxapol;	3	0	0	0	0.9228	0	0	0	0	0.11535	0.326259	0.123314	0	0	0	0	0	0	0	0	0	0	0	0	0	0	0	0	0	0	0	0	0	0.4111	0	0.1546	0	0.0808143	0.156625	0.0591986	0	0
	1009	2.5563	240.077	C8H18ClNO2;C7H15N;	Na_Na;NaCl_HCOONa;	3.1657	Carpronium chloride; Aminomethylcyclohexane	3	0	0	0	1.5022	0	0	0	0	0.187775	0.531108	0.20074	0	0.3741	0	0	0	0	0.06235	0.152726	0.06235	0	0	0	0	0	0	0	0	0	0	0	0	0	0	0	0	0	0	0	0	0
	1010	2.5565	837.75				Unidentified	4	0	0	0	0.9236	0	0	0	0	0.11545	0.326542	0.123421	0	0	0	0	0	0	0	0	0	0	0	0	0	0	0	0	0	0	0	0	0	1.6502	0	0	0	0.235743	0.623717	0.235743	1.1996	1.2879
	1011	2.5568	970.55	C46H86NO10P;	NaCl_HCOONa;	3.52378	PS (40:2)	3	0	0	0	0	0.6963	0	0	0	0.0870375	0.246179	0.093047	0	0	0	0	0	0	0	0	0	0	0	0	0	0	0	0	0	0	3.9054	0	0	0	2.9746	0	0	0.982857	1.69992	0.642509	2.2966	2.9583
	1012	2.5573	100.026				Unidentified	4	0	0	0.3699	0	0	0	0	0	0.0462375	0.130779	0.04943	0.7793	0	0	0	0	0	0.129883	0.318148	0.129883	1.4498	0.5774	0	0	0	0	0.337867	0.591673	0.24155	0	0	0	0.9732	0	0	0	0.139029	0.367835	0.139029	0	1.1601
	1013	2.5584	659.753				Unidentified	4	0	0	0	0	0.6715	0	0	0	0.0839375	0.237411	0.089733	2.4221	0	0	0	0	0	0.403683	0.988818	0.403683	0	0	0	0	0	0	0	0	0	3.929	0	0	3.2959	3.415	0	0	1.51999	1.90568	0.72028	0.2051	4.1232
	1014	2.5589	51.358				Isotope	4	0	0.1569	0.2114	0	0.1679	0	0	0	0.067025	0.0937772	0.0354445	1.76	0	0	0	0	0	0.293333	0.718517	0.293333	0.5421	0	0	0	0	0	0.09035	0.221311	0.09035	0	0	0	2.7731	0	0	0	0.396157	1.04813	0.396157	0	1.5382
	1015	2.5589	794.32				Unidentified	4	0	3.4027	3.3617	0	0	0	0	0	0.84555	1.56569	0.591776	0	0	0	0	0	0	0	0	0	0	0	0	0	0	0	0	0	0	0	0	0	7.009	3.2019	0	0	1.4587	2.72285	1.02914	2.2029	0
	1016	2.5593	766.836				Unidentified	4	0	0	0	0.1947	0.8473	0	0	0	0.13025	0.297635	0.112495	2.9845	6.4211	0	0	0	0	1.5676	2.66058	1.08618	0	0	0	0	0	0	0	0	0	0	0	0	0	0	0	0	0	0	0	0	0
	1017	2.5593	819.221				Unidentified	4	0	0	0.4789	0	0	0	0	0	0.0598625	0.169317	0.0639957	0	0	0	0	0	0	0	0	0	0	0	0	0	0	0	0	0	0	0	0	0	0	0	0	0	0	0	0	0	0
	1018	2.5595	830.503	C39H83NO7P2S;C39H78NO7P;	NaCl;NaCl_HCOONa;	4.79229	Hexadecylthio-deoxy-hexadecylphosphono-sn-glycero-3-phosphocholine; (octadecanoyl)-hexadecyl-sn-glycero-phosphoethanolamine; PC(dm31:0); PE(dm34:0)	3	0	0	2.9791	0	1.0585	0	0	0	0.5047	1.06621	0.402991	0	4.7216	0	0	0	0	0.786933	1.92759	0.786933	0	0	0	0	0	0	0	0	0	4.2812	0	0	5.318	3.3227	0	0	1.84599	2.37334	0.897039	4.0916	4.8172
	1019	2.5596	905.906				Unidentified	4	0	0.9023	0	0	2.786	0	0	0	0.461037	0.991067	0.374588	0	0	0	0	0	0	0	0	0	0	0	0	0	0	0	0	0	0	0	0	0	0	0	0	0	0	0	0	3.3178	0
	1020	2.5602	323.152	C17H22O6;C16H20N4O2;C13H24N4O3;C19H22N2;C15H24N2O2;	H;Na;K;Na_Na;NaCl;	2.81604	epi-Tulipinolide diepoxide; Tetraneurin A; Apazone; Itasetron; Melanostatin; Triprolidine; Hydroxylupanine; Ammothamnine; Lamprolobine; Nuttalline; Tetracaine	3	0	0	0.7551	0	0	0	0	0	0.0943875	0.266968	0.100904	0.4784	0	0	0	0	0	0.0797333	0.195306	0.0797333	0	0	0	0	0	0	0	0	0	0	0	0	0	0	0	0	0	0	0	0	0
	1021	2.5605	509.179	C28H26N2O6;C27H30O6;C24H34O7;C24H28N2O5;C24H31ClO4;C24H30O4;	Na;NaCl;KCl;HCOOK;Na_HCOONa;NaCl_HCOONa;	0.294598	Haplodimerine; Sofalcone; Ajugarin I; Clerodin; Phorbol 13-butanoate; Benazepril; Clomegestone acetate; 3,12-Dioxochola-1,4,9(11)-trien-24-oic Acid; Ammoresinol	3	0	0	0	2.4604	0	0	0	0	0.30755	0.869883	0.328785	0	0	0	0	0	0	0	0	0	0	0	0	0	0	0	0	0	0	0	0	0	0	0	0	0	0	0	0	2.7852	0
	1022	2.5611	744.61	C44H85NO3;	HCOONa;	4.0422	Ceramide (d18:1/26:1)	3	0	2.8129	0	0	0	0	0	0	0.351612	0.99451	0.37589	0	0	0	0	0	0	0	0	0	0.349	0	0	0	0	0	0.0581667	0.142479	0.0581667	0	0	0	0.4683	0	0	0	0.0669	0.177001	0.0669	1.7241	0
	1023	2.5614	689.774				Unidentified	4	0	0	0	0.9824	0	0	0	0	0.1228	0.347331	0.131279	0	0	0	0	0	0	0	0	0	1.0119	0	0	0	0	0	0.16865	0.413106	0.16865	0	0	0	2.4691	0	0	0	0.352729	0.933232	0.352729	0	2.3604
	1024	2.5628	547.208	C30H32ClF3NO3;C23H36N6O5S;C31H32N4O3;C28H35FO7;C27H36O8;C24H40O8S;C26H35FO6;	H;K;K;Na_Na;NaCl;NaCl;HCOOK;	1.90055	Fluperamide; Argatroban; PD 123319; Amcinonide; Prednicarbate; 7-Sulfocholic acid; Amcinafal; Amelometasone; Fluprednisolone valerate	3	6.232	6.628	6.0543	6.3926	6.7857	0	0	0	4.01157	3.32935	1.25838	3.9419	3.4491	0	0	0	0	1.23183	1.9147	0.781673	10.4502	9.1697	0	0	0	0	3.26998	5.08199	2.07472	0	0	0	0	0	0	0	0	0	0	0	2.5443
	1025	2.5631	821.415	C40H64O12;C39H67O8P;	HCOOK;NaCl_HCOONa;	2.61746	Nonactin; PA (36:5)	3	0	0	0	0	0	0	0	0	0	0	0	0	0	0	0	0	0	0	0	0	0	0	0	0	0	0	0	0	0	0	0	0	0	0	0	0	0	0	0	2.0807	2.72
	1026	2.5631	970.619	C50H96NO7P;	NaClx2;	1.73085	PC(24:1/dm18:1)	3	0	1.5333	2.7064	0	0	0	0	0	0.529963	1.03017	0.389367	0	0	0	0	0	0	0	0	0	0	0	0	0	0	0	0	0	0	0	0	0	0	0	0	0	0	0	0	0	0
	1027	2.5635	857.667				Unidentified	4	0	2.2758	0	0	0	0	0	0	0.284475	0.804617	0.304117	0	0	0	0	0	0	0	0	0	0	0	0	0	0	0	0	0	0	0	0	0	0	0	0	0	0	0	0	2.8404	0
	1028	2.5649	830.596				Unidentified	4	0	1.0042	0	0	3.193	0	0	0	0.52465	1.13399	0.42861	3.1353	0	0	0	0	0	0.52255	1.27998	0.52255	0	0	0	0	0	0	0	0	0	4.7536	0	0	0	0	0	0	0.679086	1.79669	0.679086	0	0
	1029	2.5652	441.237	C25H32N2O5;C21H39O6P;C18H29N7O3S;C26H36O3;C22H38O5;C19H38O3;	H;Na;NH3;Na_Na;NaCl;NaCl_HCOONa;	4.71402	Ifetroban; CPA(18:1); S-Adenosyl-1,8-Diamino-3-Thiooctane; Estradiol 17beta-cyclopentylpropionate; Estradiol cypionate; 15-methyl-15R-PGF2alpha methyl ester; 16,16-dimethyl-PGE1; 16,16-dimethyl-PGF2beta; 1a,1b-dihomo-PGE1; 1a,1b-dihomo-PGF2alpha; 20-ethyl PGF2alpha; Carboprost methyl; Misoprostol; Octylphenoxy polyethoxyethanol; 19-hydroxy-nonadecanoic acid; 2-hydroxy-nonadecanoic acid	3	0	0	0	0	0	0	0	0	0	0	0	0.911	0	0	0	0	0	0.151833	0.371914	0.151833	0	0	0	0	0	0	0	0	0	0	0	0	0	0	0	0	0	0	0	1.3693	0
	1030	2.5655	154.088				Unmatched Adduct	4	0	2.0919	1.9689	3.4468	0	0	0	0	0.93845	1.36735	0.51681	2.4048	0	0	0	0	0	0.4008	0.981755	0.4008	3.5395	0	0	0	0	0	0.589917	1.44499	0.589917	0	0	0	0	0	0	0	0	0	0	0	0
	1031	2.5682	942.34				Unidentified	4	0	0.8197	0.6963	0.2359	0	0	0	0	0.218988	0.344082	0.130051	0	0.891	0	0	0	0	0.1485	0.363749	0.1485	0	0	0	0	0	0	0	0	0	0	0	0	0	0	0	0	0	0	0	0	0
	1032	2.5684	766.706	C15H9I3O5;	NaClx2;	0.847809	Triiodothyropyruvate;;	3	0	0.5448	3.3545	0	0	0	0	0	0.487412	1.17406	0.443753	2.4454	4.4542	0	0	0	0	1.14993	1.89134	0.772136	0	0	0	0	0	0	0	0	0	0	0	0	7.9118	0	0	0	1.13026	2.99038	1.13026	0	4.3043
	1033	2.5686	794.463	C41H63NO14;C40H70NO10P;C39H68NO8P;	H;K;HCOOK;	3.23501	Protoveratrine A; 16:1-18:3-PS; L-Alpha-Phosphatidyl-Oleoyl-Gamma-Palmitoyl-Phosphatidylethanolamine; PE(34:5);	3	0	0	0.709	0	0	0	0	0	0.088625	0.250669	0.0947441	0	2.8213	0	0	0	0	0.470217	1.15179	0.470217	0	0	0	0	0	0	0	0	0	0	0	1.1072	0	0	0	0	0.158171	0.418482	0.158171	0	0
	1034	2.5686	873.651				Unidentified	4	0	0	2.9699	1.3483	0	0	0	0	0.539775	1.08939	0.41175	2.5096	0	0	0	0	0	0.418267	1.02454	0.418267	0	0	0	0	0	0	0	0	0	0	0	0	3.9448	3.6706	0	0	1.08791	1.85965	0.702883	0	2.4534
	1035	2.5687	857.383				Unidentified	4	11.237	7.7104	0	0	0	0	0	0	2.36843	4.48561	1.6954	0	8.9678	8.6404	0	0	0	2.9347	4.5476	1.85655	0	0	0	0	0	0	0	0	0	6.1328	0	0	8.3858	0	0	0	2.07409	3.60139	1.3612	10.411	3.8034
	1036	2.5689	766.934				Unidentified	4	0	0	1.4967	0	0.5548	0	0	0	0.256437	0.537432	0.20313	0	0	0	0	0	0	0	0	0	0.3283	0	0	0	0	0	0.0547167	0.134028	0.0547167	0	0	0	0	0	0	0	0	0	0	0	0
	1037	2.5693	396.176	C21H27NO5;C19H29NO5;C13H30NO6P;C20H25NO3;C18H27NO3;	Na;Na_Na;HCOONa;HCOONa;Na_HCOONa;	2.34744	Hasubanonine; Dipivefrin; PC(O-5:0/0:0); Benactyzine; Difemerine; Dimenoxadol; Capsaicin; Droxypropine; Zucapsaicin	3	0	0	0	0	0	0	0	0	0	0	0	0	0	0	0	0	0	0	0	0	0	0	0	0	0	0	0	0	0	0	0	0	0	0	0	0	0	0	0	0.9706	0
	1038	2.5694	342.243	C22H31NO2;C22H28O2;	H;NH3;	1.02266	Lindheimerine; Pregnenolone carbonitrile; Docosatetraynoic acid; Etonogestrel	3	0	1.4901	1.5551	0	1.5567	0	0	0	0.575237	0.794163	0.300165	0	0	0	0	0	0	0	0	0	0	0	0	0	0	0	0	0	0	0	0	0	0	0	0	0	0	0	0	2.3592	0
	1039	2.5696	328.225	C19H31NO2;C16H26N2O4;C17H33NO2;C18H29N;	Na;NH3;Na_Na;HCOONa;	1.58429	Nitro-androstane; Cetamolol; Prosafrinine; Octadecatrienenitrile	3	0	0	0	1.2758	0.4368	0	0	0	0.214075	0.455417	0.172132	0	0	0	0	0	0	0	0	0	0	0	0	0	0	0	0	0	0	0	0	0	0	0	0	0	0	0	0	1.8847	0.3503
	1040	2.5705	877.436				Unidentified	4	0	0	0	0	0	0	0	0	0	0	0	0	0	0	0	0	0	0	0	0	3.8277	0	0	0	0	0	0.63795	1.56265	0.63795	0	0	0	1.872	0	0	0	0.267429	0.707549	0.267429	0.3984	0.5566
	1041	2.5709	906.006				Unidentified	4	0	0	0.5328	0	0	0	0	0	0.0666	0.188373	0.0711984	0	0	0	0	0	0	0	0	0	0	0	0	0	0	0	0	0	0	3.4556	0	0	3.0719	3.1	0	0	1.37536	1.71981	0.650027	4.7579	0
	1042	2.5711	766.612	C44H80NO7P;C42H82NO7P;	H;Na;	0.756616	PC(18:3/dm18:1); PC(18:4/dm18:0); PC(20:4/dm16:0); PC(O-16:0/20:5); PC(P-16:0/20:4); 2-(9Z,12Z-octadecadienoyl)-1-hexadecyl-sn-glycero-3-phosphochline; PC(16:0/dm18:1); PC(16:1/dm18:0); PC(O-16:0/18:2); PC(O-16:1/18:1); PC(P-16:0/18:1); PnC(16:0/18:1)	3	0	0	0.9452	1.8465	0	0	0	0	0.348963	0.689593	0.260642	0	0	0	0	0	0	0	0	0	0	0	0	0	0	0	0	0	0	4.9835	0	4.6128	0	3.0024	0	0	1.79981	2.32566	0.879018	4.5033	0
	1043	2.5714	216.071				Unidentified	4	0	0	0	0	0	0	0	0	0	0	0	0	0	0	0	0	0	0	0	0	1.0121	0	0	0	0	0	0.168683	0.413188	0.168683	0	0	0	0	0	0	0	0	0	0	0.5478	0
	1044	2.5715	744.668				Unidentified	4	0	0	0.6474	0	0.3999	0	0	0	0.130912	0.251266	0.0949696	2.3996	2.8567	0	0	0	0	0.87605	1.36485	0.557196	0	0	0	0	0	0	0	0	0	0	0	0	0	0	0	0	0	0	0	1.3878	0.2807
	1045	2.5717	857.583	C15H11I4NO7S;C47H93N2O6P;	H;Na_Na;	1.29423	Thyroxine sulfate; SM(d18:1/24:1)	3	0	0.7434	0	2.7028	0	0	0	0	0.430775	0.954181	0.360647	0	0	0	2.4836	0	0	0.413933	1.01393	0.413933	0	0	0	0	0	0	0	0	0	3.7082	0	0	3.8767	8.4697	0	0	2.29351	3.25817	1.23147	0	5.2956
	1046	2.5724	728.156	C32H40BrN5O5;	KCl;	1.11239	Bromocriptine	3	0	0	0	0	0.3322	0	0	0	0.041525	0.11745	0.0443921	0	0	0	0	0	0	0	0	0	0.3229	0	0	0	0	0	0.0538167	0.131823	0.0538167	0	0	0	3.0373	3.0988	0	0	0.876586	1.49716	0.565873	0	0
	1047	2.5727	727.973				Unidentified	4	0	0	0.3793	0	0	0	0	0	0.0474125	0.134103	0.0506861	0.158	0	0	0	0	0	0.0263333	0.0645032	0.0263333	0	0	0	0	0	0	0	0	0	0	0	0	0	0	0	0	0	0	0	0.4912	0
	1048	2.5738	883.269	C35H42N8O15;	HCOONa;	4.58525	Ly231514 Tetra Glu	3	0	0	0	1.0003	0	0	0	0	0.125037	0.353659	0.133671	0.9601	0	0	0	0	0	0.160017	0.391959	0.160017	0	0	0	0	0	0	0	0	0	0	0	0	1.7673	0	0	0	0.252471	0.667977	0.252471	0	0
	1049	2.5742	857.228				Unidentified	4	0	0	5.0618	0	6.2682	7.9712	0	0	2.41265	3.42022	1.29272	0	7.7751	0	0	0	0	1.29585	3.17417	1.29585	0	0	0	0	0	0	0	0	0	0	0	0	0	0	0	0	0	0	0	4.4261	0
	1050	2.5745	371.252	C21H36FO2P;C20H38O3;C19H36O;	H;Na_Na;Na_HCOONa;	1.18518	Methoxy arachidonyl fluorophosphonate; hydroxy-eicosenoic acid; oxo-eicosanoic acid; 2-Oxophytanate; Lesquerolic acid; Nonadecenal	3	0	0.523	0	0	0	0	0	0	0.065375	0.184908	0.0698888	0	0	0	0	0	0	0	0	0	0	0	0	0	0	0	0	0	0	0	0	0	0	0	0	0	0	0	0	1.3057	0
	1051	2.5746	355.062	C16H16Cl2N2O3;C19H14O5S;C13H16O10;C14H12ClN3O3S;C11H15NO7S2;C16H21ClO2;C14H11FN4O;C16H15ClN2;C10H16O8;	H;H;Na;NH3;NH3;KCl;HCOOK;HCOOK;Na_HCOONa;	2.39395	WIN56291; Phenolsulfonphthalein; O-Galloyl-glucose; Fenquizone; Disufenton; Parachlorophenol, camphorated; CRA_1802; Medazepam; Methyl-O-[(1r)-Carboxyethylidene]-Galactopyranoside	3	100.05	117.681	104.734	67.9598	62.9131	44.763	38.1571	57.1687	74.1784	29.5519	11.1696	64.5858	51.2176	37.133	52.3423	40.1259	58.1079	50.5854	10.4542	4.26792	75.2568	76.5019	65.9528	77.827	74.452	97.3478	77.8897	10.4095	4.24966	51.1836	49.3512	45.7487	77.0826	57.6397	53.9818	57.3086	56.0423	10.2097	3.85891	39.2604	75.7553
	1052	2.5749	346.232	C17H33N5;C21H28O3;	K;NH3;	3.63912	Octahydro-1h-Indolylmethyl-Decahydroquinazoline-Diamine; Dihydroxypregnatrienone; Epoxypregnenedione; (Allyloxy)estra-triene-diol; Nomegestrol; Pyrethrin	3	0	0	0.5111	0.9383	0	0	0	0	0.181175	0.354368	0.133938	0.2857	0	0	0	0	0	0.0476167	0.116637	0.0476167	0	0	0	0	0	0	0	0	0	0	0	0	0	0	0	0	0	0	0	0	0
	1053	2.575	760.874				Unidentified	4	0	0	0	2.7191	0	0	0	0	0.339888	0.961347	0.363355	0	0	0	0	0	0	0	0	0	0	0	0	0	0	0	0	0	0	0	0	0	0	0	0	0	0	0	0	2.6938	4.2493
	1054	2.575	789.118	C34H28O22;	H;	2.78793	Tetragalloyl-glucose;	3	0	0.5516	1.4503	0	0	0	0	0	0.250238	0.521903	0.197261	0	1.0995	0	0	0	0	0.18325	0.448869	0.18325	0	0	0	0	0	0	0	0	0	0	0	0	0	0	0	0	0	0	0	0	0
	1055	2.575	857.181				Unidentified	4	0	0	0	0	0	0	0	0	0	0	0	0	0.6413	2.1341	0	0	0	0.462567	0.858119	0.350326	3.3801	0	0	0	0	0	0.56335	1.37992	0.56335	0	0	0	0.5597	5.284	0	0	0.834814	1.97296	0.74571	2.3923	1.1514
	1056	2.5751	714.517				Unidentified	4	0	4.9748	1.0181	0	5.992	0	0	0	1.49811	2.49956	0.944744	0	4.7689	0	0	0	0	0.794817	1.9469	0.794817	0	0	0	0	0	0	0	0	0	0	0	0	7.0223	0	8.6339	0	2.2366	3.84795	1.45439	4.0542	0
	1057	2.5753	259.115	C9H18N4O2;	Na_Na;	1.42794	Allyl-Arginine	3	0	0	0	2.8073	0	0	0	0	0.350913	0.99253	0.375141	2.2817	0	0	0	0	0	0.380283	0.9315	0.380283	1.2007	0	0	0	0	0	0.200117	0.490184	0.200117	0	0	0	0.5289	0	0	0	0.0755571	0.199905	0.0755571	1.2842	0
	1058	2.5761	775.787				Unidentified	4	0	0	0	0	0	0	0	0	0	0	0	0	0	0	0	0	0	0	0	0	0	0	0	0	0	0	0	0	0	0	0	0	0	0	0	0	0	0	0	0	0
	1059	2.5763	273.148	C17H18N2;C14H22N2O;C13H18ClNO2;	Na;K;NH3;	2.30654	Tetramethyl-Methyl Phenanthrolinium; Amfetaminil; Dazepinil; Angustifoline; Lidocaine; Alaproclate; Hydroxybupropion; Radafaxine	3	0	0	0	0	0	0	0	0	0	0	0	0	0	0	0	0	0	0	0	0	0	0	0	0	0	0	0	0	0	0	0	0	0	0	0	0	0	0	0	0	0
	1060	2.5763	890.045	C21H32N7O18P3;	NaCl_HCOONa;	3.46047	Hydroxy-tetrahydronicotinamide-adenine dinucleotide-phosphate;	3	0	0	0.2695	0.4732	0.5632	0	0	0	0.163238	0.239216	0.0904152	2.2875	0	0	0	0	0	0.38125	0.933868	0.38125	0	0	0	0	0	0	0	0	0	0	0	0	3.3684	0	0	0	0.4812	1.27314	0.4812	1.2096	0
	1061	2.5766	476.174	C21H32N3O5P;C22H25N5O2;C22H33NO3;	K;HCOOK;NaClx2;	1.91108	Disopyramide phosphate; Rizatriptan benzoate; Ajaconine; Napelline	3	0	0	0	0	0	0	0	0	0	0	0	0	0	0	0	0	0	0	0	0	0	0	0	0	0	0	0	0	0	0	0	0	0	0	0	0	0	0	0	0	0
	1062	2.5773	347.127	C17H24O6;C18H20N4O2;C16H22N4O2;C16H22O4;	Na;Na;Na_Na;HCOONa;	3.6584	Tetraneurin E; CRA_10656; Aminopropylon; Ethylhexyl phthalate; Carboxy-chromanol; prenylphlorisovalerophenone; CEHC; Dibutyl phthalate; Diisobutyl phthalate	3	0	0	0	0	0	0	0	0	0	0	0	0	0	0	0	0	0	0	0	0	0	0	0	0	0	0	0	0	0	0	0	0	0	0	0	0	0	0	0	0	0
	1063	2.5773	779.368	C35H46N6O8S;	HCOONa;	3.81111	Amogastrin	3	9.7855	3.7513	5.5089	4.8004	7.6888	8.6762	0	0	5.02639	3.69358	1.39604	0	0	0	0	0	0	0	0	0	0	0	0	0	0	0	0	0	0	4.5014	0	0	0	7.6833	0	0	1.74067	3.11143	1.17601	0	0
	1064	2.5773	803.84				Unidentified	4	0	1.4946	1.2531	0	2.9557	0	0	0	0.712925	1.10027	0.415863	0	0	0	0	0	0	0	0	0	0	0	0	0	0	0	0	0	0	0	0	0	0	0	0	0	0	0	0	0	0
	1065	2.5774	880.319				Unidentified	4	0	1.3165	0	0	0	0	0	0	0.164563	0.465453	0.175925	0	0	0	0	0	0	0	0	0	0	0	0	0	0	0	0	0	0	0	0	0	0	0	0	0	0	0	0	2.34	0
	1066	2.5775	794.255	C40H44N2O12S;C30H45N6O16P;	NH3;NH3;	2.11508	Papaverine sulfate; tetrahydromethanopterin	3	3.897	3.2327	0	1.9001	0	0	0	0	1.12872	1.6499	0.623603	0	0	0	0	0	0	0	0	0	0	0	0	0	0	0	0	0	0	0	0	0	0	0	0	0	0	0	0	2.2029	4.1579
	1067	2.5778	818.882				Unidentified	4	0	0	0	1.9478	0	0	0	0	0.243475	0.688651	0.260286	0	0	0	0	0	0	0	0	0	0	0	0	0	0	0	0	0	0	0	0	0	0	0	0	0	0	0	0	0	0
	1068	2.578	818.969				Unidentified	4	0	0	0.5061	0	0.2238	0	0	0	0.0912375	0.185021	0.0699314	0	0	0	0	0	0	0	0	0	0	0	0	0	0	0	0	0	0	0	0	0	0.331	0	0	0	0.0472857	0.125106	0.0472857	0	0
	1069	2.5782	873.718				Unidentified	4	0	0.2332	0.3468	0	0	0	0	0	0.0725	0.137634	0.0520209	0	0	0	0	0	0	0	0	0	0.3523	0	0	0	0	0	0.0587167	0.143826	0.0587167	0	0	0	0	0	0	0	0	0	0	2.2124	0
	1070	2.5788	890.323	C46H51N3O10;	HCOOK;	0.0786229	N-(1-Benzyl-3-{[3-(1,3-Dioxo-1,3-Dihydro-Isoindol-2-Yl)-Propionyl]-[2-(Hexahydro-Benzo[1,3]Dioxol-5-Yl)-Ethyl]-Amino}-2-Hydroxy-Propyl)-4-Benzyloxy-3,5-Dimethoxy-Benzamide	3	0	0	0	0	0	0	0	0	0	0	0	0	0	0	0	0	0	0	0	0	0	0	0	0	0	0	0	0	0	0	0	0	0	0	0	0	0	0	0	0.7846	0
	1071	2.5789	711.93	C14H23NO21S3;	KCl;	4.08748	Heparan sulfate;	3	0	0	0	0	0	0	0	0	0	0	0	0	0	0	0	0	0	0	0	0	0	0	0	0	0	0	0	0	0	0	0	0	0	0	0	0	0	0	0	2.4919	0
	1072	2.5791	297.149	C19H20O3;	H;	2.96147	Prenylresveratrol;;	3	0	0	0	0	0	0	0	0	0	0	0	0	0	0	0	0	0	0	0	0	0	0	0	0	0	0	0	0	0	0	0	0	0	0	0	0	0	0	0	0	0.4742
	1073	2.5791	905.835				Unidentified	4	0	0	0	0	0.3984	0	0	0	0.0498	0.140856	0.0532384	2.6803	4.0765	0	0	0	0	1.12613	1.7996	0.734684	0	0	0	0	0	0	0	0	0	0	0	0	3.6295	0	0	0	0.5185	1.37182	0.5185	0	0
	1074	2.5796	830.329				Unidentified	4	0	0	0.4211	1.6344	0	0	0	0	0.256937	0.575755	0.217615	3.5921	0	0	0	0	0	0.598683	1.46647	0.598683	0	0	0	0	0	0	0	0	0	0	0	0	0	0	0	0	0	0	0	2.639	2.6584
	1075	2.5801	794.369				Unidentified	4	0	0	0	0	2.9566	0	0	0	0.369575	1.04532	0.395092	0	0	0	0	0	0	0	0	0	0	0	0	0	0	0	0	0	0	0	0	0	0	0	0	0	0	0	0	2.2778	0.4546
	1076	2.5802	714.722				Unidentified	4	7.0696	1.0777	5.8066	0	0	0	0	0	1.74424	2.94032	1.11134	0	5.9274	0	0	0	9.2964	2.5373	4.07259	1.66263	2.6786	0	0	0	0	0	0.446433	1.09353	0.446433	5.0963	0	0	0	3.4603	11.455	0	2.8588	4.3196	1.63266	4.0851	0
	1077	2.5806	744.54	C41H78NO8P;	H;	4.08297	PE (36:2); PC(33:2);	3	0	0	0	0	0	0	0	0	0	0	0	2.0498	0	0	0	0	0	0.341633	0.836827	0.341633	0	0	0	0	0	0	0	0	0	0	0	0	0	0	0	0	0	0	0	1.4961	0
	1078	2.5807	873.487	C43H79O13P;	K;	4.19011	PI(34:2)	3	0	0	4.293	0	0	0	0	0	0.536625	1.5178	0.573676	0	0	0	0	0	0	0	0	0	0	0	0	0	0	0	0	0	0	0	0	0	0	0	7.8735	0	1.12479	2.9759	1.12479	0	0
	1079	2.5807	905.768				Unidentified	4	0	0.2748	0	1.5026	0	0	0	0	0.222175	0.52623	0.198896	0	0	0	0	0	0	0	0	0	0	0	0	0	0	0	0	0	0	0	0	0	0	0	0	0	0	0	0	2.1978	0
	1080	2.5812	910.215	C38H61I2N3S3;C29H50N7O18P3S;	H;H;	0.703125	Platonin; (S)-Hydroxyoctanoyl-CoA	3	0.7686	1.1201	0	1.2024	0	0	0	0	0.386387	0.547302	0.206861	0	0	0	0	0	0	0	0	0	0	0	0	0	0	0	0	0	0	0	0	0	0	0	0	0	0	0	0	4.5304	0
	1081	2.5813	714.576	C45H76O5;	NH3;	0.601732	DG(42:6)	3	0	0	0.6815	7.3635	0	0	0	0	1.00562	2.58001	0.975154	0	0	0	0	0	0	0	0	0	0	0	0	0	0	0	0	0	0	5.3555	0	0	0	0	16.4789	0	3.1192	6.21999	2.35094	0	0
	1082	2.5815	581.196	C27H36O11;C29H33FO6;C26H34F2O7;C26H34O9;C20H38O11;	Na_Na;HCOOK;HCOOK;Na_HCOONa;NaCl_HCOONa;	2.89059	Aldosterone-glucuronide;Betamethasone benzoate; Flumoxonide; oxo-retinoyl-glucuronide; crocetin monoglucosyl ester; deoxylimononic acid D-ring-lactone; [Dihydroxy-Hydroxymethyl-(Hydroxy-Nonyl)-Tetrahydro-Furan-yloxy]-Hydroxymethyl-Tetra Hydro-Pyran-Triol; octyl galactofuranosyl-glucopyranoside	3	0	0	0	0	0	0	0	0	0	0	0	0	1.1461	0	0	0	0	0.191017	0.467893	0.191017	3.4256	0	0	0	0	0	0.570933	1.3985	0.570933	0	0	0	0	0	0	0	0	0	0	0	0
	1083	2.5819	794.423	C44H72O11;	NH3;	3.10872	Oligomycin D; Rutamycin	3	2.7096	0	0	0	0	0	0	0	0.3387	0.957988	0.362086	0	0	0	0	0	0	0	0	0	0	0	0	0	0	0	0	0	0	0	0	0	0	0	0	0	0	0	0	0	0
	1084	2.5823	952.356				Unidentified	4	0	0	5.573	5.2147	0	8.5916	0	0	2.42241	3.48717	1.31803	0	7.5578	5.3023	0	0	0	2.14335	3.3962	1.38649	0	0	0	0	0	0	0	0	0	0	0	0	0	0	0	0	0	0	0	5.0213	2.6032
	1085	2.5831	744.732				Unidentified	4	0	0	0	0	0	0	0	0	0	0	0	1.185	0	0	0	0	0	0.1975	0.483774	0.1975	0.6206	0	0	0	0	0	0.103433	0.253359	0.103433	0	0	0	0	0	0	0	0	0	0	1.7374	0.3352
	1086	2.5834	712.005				Unidentified	4	0	0.2092	0	0	0	0	0	0	0.02615	0.0739634	0.0279555	0.1941	0	0	0	0	0	0.03235	0.079241	0.03235	0	0	0	0	0	0	0	0	0	0	0	0	0	0	0	0	0	0	0	2.2041	2.4812
	1087	2.5835	906.101	C28H39ClN7O17P3S;	H;	2.01963	Chlorobenzoyl-CoA	3	0	2.8185	0	0	0	0	0	0	0.352312	0.99649	0.376638	0	3.6425	0	0	0	0	0.607083	1.48704	0.607083	0.3098	0	0	0	0	0	0.0516333	0.126475	0.0516333	0	0	0	3.2841	0	0	0	0.469157	1.24127	0.469157	2.8549	0
	1088	2.5837	910.406				Unidentified	4	0	0.4286	0	0	0	0	0	0	0.053575	0.151533	0.0572741	0	0.7819	0	0	0	0	0.130317	0.319209	0.130317	0	0	0	0	0	0	0	0	0	0	0	0	0	0.6272	0	0	0.0896	0.237059	0.0896	1.3943	0.3871
	1089	2.5839	327.2	C14H30O8;	H;	3.17848	Heptaethylene Glycol, Peg330	3	0	0	0	0	0	0	0	0	0	0	0	1.9524	0	0	0	0	0	0.3254	0.797064	0.3254	3.0221	0	0	0	0	0	0.503683	1.23377	0.503683	0	0	0	1.6253	0	0	0	0.232186	0.614306	0.232186	0	1.3764
	1090	2.5839	504.159	C25H27N3O5S;C22H28FN3O6S;C22H31N3O6S;C20H25N7O6;C23H27NO6;	Na;Na;K;Na_Na;Na_HCOONa;	1.82482	Bifeprunox mesylate; Rosuvastatin; Benzylpenicilloyl Polylysine; Methyl-Tetrahydrofolic Acid; Methyltetrahydrofolate; 5-methyl-THF; Trepipam maleate	3	0	0.1474	0	0	0.2221	0	0	0	0.0461875	0.087822	0.0331936	0	0	0	0	0	0	0	0	0	0	0	0	0	0	0	0	0	0	0	0	0	0	0	0	0	0	0	0	0.491	0
	1091	2.5841	766.773				Unidentified	4	0	3.2148	0	0	0	0	0	0	0.40185	1.1366	0.429596	0	0	5.3621	0	0	0	0.893683	2.18907	0.893683	0	0	0	0	0	0	0	0	0	0	0	0	0	3.4279	0	0	0.4897	1.29562	0.4897	0	0.6888
	1092	2.5842	857.289	C45H54O9S3;	Na;	1.51642	Egualen	3	0	0.5964	4.9649	0	0	0	0	0	0.695163	1.73781	0.656831	0	0	0	0	0	19.473	3.2455	7.94982	3.2455	5.2124	0	0	0	0	0	0.868733	2.12795	0.868733	11.1948	0	0	9.9981	0	19.2871	0	5.78286	7.78019	2.94063	0	0.892
	1093	2.5843	952.463	C49H74NO8P;	NaClx2;	3.3598	PE(44:12)	3	6.0636	0.5952	6.2206	0	0.69	0	0	0	1.69617	2.75881	1.04273	6.9796	4.0868	0	0	0	12.811	3.97957	5.18684	2.11752	0	0	0	0	0	0	0	0	0	0	5.7003	0	7.5243	8.0781	14.3491	0	5.09311	5.45714	2.0626	6.1974	8.6091
	1094	2.5848	952.61				Unidentified	4	0	0	6.2964	4.7791	2.9726	0	0	0	1.75601	2.58159	0.975748	4.8722	0	0	0	0	0	0.812033	1.98907	0.812033	0	0	0	0	0	0	0	0	0	3.841	0	5.7391	0	6.4526	14.0918	0	4.3035	5.1359	1.94119	2.953	4.7869
	1095	2.5854	659.908				Unidentified	4	0	0	0	0.9733	0	0	0	0	0.121663	0.344114	0.130063	0	0	0	0	0	0	0	0	0	0	0	0	0	0.3802	0	0.0633667	0.155216	0.0633667	0	0	0	0	0	0	0	0	0	0	0	0
	1096	2.5858	996.365				Unidentified	4	0	0	0.4006	0	0	0	0	0	0.050075	0.141633	0.0535324	0	0	0	0	0	0	0	0	0	0	0	0	0	0	0	0	0	0	0	0	0	0.809	0	0	0	0.115571	0.305773	0.115571	2.8054	0
	1097	2.5859	985.871				Unidentified	4	0	0.5907	0	3.4447	0	0	0.1445	0	0.522487	1.19832	0.452923	0	2.744	0	0	0	0	0.457333	1.12023	0.457333	0	0	0	0	0	0	0	0	0	0	0	0	0.349	0	0	0	0.0498571	0.13191	0.0498571	4.912	0
	1098	2.587	985.712	C62H100O6;C55H102O6;	Na_Na;NaCl_HCOONa;	1.33912	TG(59:10); TG(52:2)	3	0	0	0	0.9997	0	0	0	0	0.124963	0.353447	0.133591	0	0	0	0	0	0	0	0	0	0	0	0	0	0	0	0	0	0	0	0	0	0	0	0	0	0	0	0	0	0
	1099	2.5878	779.693				Unidentified	4	0	0	0	8.1223	0	0	0	0	1.01529	2.87167	1.08539	5.7996	0	0	0	0	0	0.9666	2.36768	0.9666	0	0	0	0	0	0	0	0	0	0	0	0	8.1408	0	0	0	1.16297	3.07693	1.16297	3.7865	0
	1100	2.5878	970.725				Unidentified	4	0	0	0	0	0	0	0	0	0	0	0	4.0651	0	0	1.754	0	0	0.96985	1.6708	0.682102	0	0	0	0	0	0	0	0	0	0	0	0	1.6994	0	0	0	0.242771	0.642313	0.242771	0	0
	1101	2.5879	225.161				Unidentified	4	0	0	0	1.0257	0	0	0	0	0.128213	0.36264	0.137065	0	0	0	0	0	0	0	0	0	0	0	0	0	0	0	0	0	0	0	0	0	0	0	0	0	0	0	0	0	0
	1102	2.588	565.175	C30H28O11;C22H32N4O6S;C23H30N4O5S;	H;HCOOK;Na_HCOONa;	1.3978	protoaphin aglucone; Benzylpenicilloyl polylysine; Atevirdine mesylate	3	0	0	0	1.0223	0	0	0	0	0.127787	0.361438	0.136611	0.7009	0	0	0	0	0	0.116817	0.286141	0.116817	0	0	0	0	0	0	0	0	0	0	0	0	0.5339	0	0	0	0.0762714	0.201795	0.0762714	0.2537	0
	1103	2.5883	970.672				Unidentified	4	0	0.4287	0.2114	0	0	0	0	0	0.0800125	0.159131	0.0601457	0	2.9329	0	0	0	0	0.488817	1.19735	0.488817	0	0	0	0	0	0	0	0	0	0	0	0	0	0	0	0	0	0	0	0	0
	1104	2.5886	263.11	C10H16N4O3;C8H18O5;C7H16N4O;	Na;HCOONa;Na_HCOONa;	4.75086	Balenine; Alanyl-methyl-histidine; Homocarnosine; Alpha-gamma-Glutamylhistamine; Tetraethylene Glycol; Acetylagmatine	3	0	0	0	0	0	0	0	0	0	0	0	0	0	0	0	0	0	0	0	0	0	0	0	0	0	0	0	0	0	0	0	0	0	0	0	0	0	0	0	0	0
	1105	2.5888	682.62				Unidentified	4	0	0	0	0.8571	0	0	0	0	0.107137	0.303031	0.114535	1.7708	0	0	0	0	0	0.295133	0.722926	0.295133	0	0	0	0	0	0	0	0	0	0	0	0	0	0	0	0	0	0	0	0	1.3548
	1106	2.5889	789.019				Unidentified	4	0	0	0	0	0	0	0	0	0	0	0	0.8045	0	0	0	0	0	0.134083	0.328436	0.134083	0	0	0	0	0	0	0	0	0	0	0	0	0	0	0	0	0	0	0	2.0967	0
	1107	2.5894	714.65				Unidentified	4	7.7144	11.5788	4.693	3.7304	4.8633	7.4097	0	0	4.9987	3.93119	1.48585	6.6192	5.2314	0	8.183	0	7.9817	4.66922	3.76937	1.53884	0	0	0	0	0	0	0	0	0	5.0963	5.8648	7.1202	11.2949	6.8105	0	9.8054	6.5703	3.62829	1.37137	4.8695	0
	1108	2.5895	909.875				Unidentified	4	0	0	1.0042	0.8719	0	0	0	0	0.234513	0.43567	0.164668	2.8199	0	0	0	0	0	0.469983	1.15122	0.469983	0	0	0	0	0	0	0	0	0	0	0	0	0	0	0	0	0	0	0	0	3.8012
	1109	2.5898	779.458	C39H64O13;	K;	1.57814	Tiqueside	3	5.5894	6.7415	1.5264	0	9.3821	6.421	0	0	3.70755	3.74747	1.41641	7.4213	8.5437	9.7664	6.2036	0	15.7351	7.94502	5.11452	2.08799	4.2413	0	0	0	0	0	0.706883	1.7315	0.706883	0	0	0	6.0819	7.7501	14.8226	0	4.09351	5.76578	2.17926	6.7292	4.0909
	1110	2.5903	354.223				Unidentified	4	0	0	0.2114	0	0	0	0	0	0.026425	0.0747412	0.0282495	0	0	0	0	0	0	0	0	0	0	0	0	0	0	0	0	0	0	0	0	0	0	0	0	0	0	0	0	0	0
	1111	2.5903	952.667				Unidentified	4	0	0	0	0	0	0	0	0	0	0	0	0	0	3.2055	0	0	0	0.53425	1.30864	0.53425	0	0	0	0	0	0	0	0	0	9.4216	0	0	0	0	0	0	1.34594	3.56103	1.34594	0	9.4921
	1112	2.5904	430.243	C22H31N5O4;	H;	3.41667	Melagatran	3	21.2264	23.9434	21.1622	22.4275	21.3127	23.2432	20.7946	25.2317	22.4177	1.59369	0.602357	22.5928	20.1962	18.3935	21.8087	22.7455	21.5304	21.2112	1.65478	0.67556	27.2439	19.2953	16.9707	23.2736	26.4784	24.0503	22.8854	4.03203	1.64607	19.6446	19.6853	23.4936	21.637	22.1053	22.6544	22.3759	21.6566	1.47329	0.55685	17.8012	20.8552
	1113	2.591	952.543	C42H75N3O15;	Na_HCOONa;	0.66142	Deoxy-Bigchap	3	9.7106	9.7011	0	5.7778	6.0603	12.1667	0	0	5.42706	4.9414	1.86767	2.2614	5.7543	3.9495	0	11.6754	0	3.9401	4.40439	1.79808	3.144	0	0	0	0	0	0.524	1.28353	0.524	8.9192	0	0	0	9.229	11.492	0	4.23431	5.34301	2.01947	0	0
	1114	2.5911	857.328				Unidentified	4	11.9051	7.1305	12.5535	6.3229	0	0	0	0	4.739	5.48348	2.07256	5.1985	0	0	0	0	0	0.866417	2.12228	0.866417	5.2124	0	0	0	0	0	0.868733	2.12795	0.868733	8.9326	0	0	0	0	13.2175	0	3.1643	5.54383	2.09537	0	6.3183
	1115	2.5911	970.782	C63H100O6;	NH3;	4.71785	TG(60:11)	3	0	0.2003	0	1.2762	0	0	0	0	0.184562	0.446622	0.168807	0	0	0	0	0	0	0	0	0	0.515	0	0	0	0	0	0.0858333	0.210248	0.0858333	0	0	0	0	0	0	1.2211	0.174443	0.461532	0.174443	0	0
	1116	2.5912	879.851				Unidentified	4	0	0	0	0	0	0	0	0	0	0	0	0	0	0	0	0	0	0	0	0	0	0	0	0	0	0	0	0	0	0	0	0	0	0	0	0	0	0	0	0.7352	0
	1117	2.5914	819.026				Unidentified	4	0	0	0	0	0	0	0	0	0	0	0	1.9729	0	0	0	0	0	0.328817	0.805433	0.328817	0.6055	0	0	0	0	0	0.100917	0.247194	0.100917	0	0	0	1.1743	0	0	0	0.167757	0.443844	0.167757	2.2122	0
	1118	2.5921	714.885				Unidentified	4	0	0	0	4.0431	0	0	0	0	0.505387	1.42945	0.540282	2.6364	0	0	0	0	0	0.4394	1.07631	0.4394	0	0	0	0	0	0	0	0	0	0	0	0	6.8915	0	0	0	0.9845	2.60474	0.9845	3.1451	5.9944
	1119	2.5921	728.32				Unidentified	4	0	0	0	1.8543	0	0	0	0	0.231788	0.655594	0.247791	1.4327	0	0	0	0	0	0.238783	0.584897	0.238783	1.5815	0	0	0	0	0	0.263583	0.645645	0.263583	0	0	0	1.3837	0	0	0	0.197671	0.522989	0.197671	0	0
	1120	2.5928	985.936				Unidentified	4	0	0.3253	3.375	1.869	0	0	0	0	0.696163	1.25996	0.47622	0	0	0	0	0	0	0	0	0	0	0	0	0	0	0	0	0	0	0	0	0	3.8542	0	0	0	0.5506	1.45675	0.5506	1.4344	0
	1121	2.5932	104.053				Unidentified	4	0	0	0	0	0	0	0	0	0	0	0	0	0	0	0	0	0	0	0	0	0	0	0	0	0	0	0	0	0	0	0	0	0	0	0	0	0	0	0	0	0
	1122	2.5932	996.561	C48H88NO10P;	NaCl_HCOONa;	0.130448	PS (42:3)	3	0	0	0.6003	0	0	0	0	0	0.0750375	0.212238	0.0802185	3.0739	3.4681	0	0	0	0	1.09033	1.69373	0.691463	0	0	0	0	0	0	0	0	0	0	0	0	0	0	0	0	0	0	0	1.0913	0
	1123	2.5933	125.098				Unidentified	4	0	0	1.4386	0	0	0	0	0	0.179825	0.508622	0.192241	0	0	0	0	0	0	0	0	0	2.9227	0	0	0	0	0	0.487117	1.19319	0.487117	0	0	0	0	0	0	0	0	0	0	0	0
	1124	2.5934	857.489	C41H83N2O6P;	NaCl_HCOONa;	1.58591	SM(d18:0/18:1); SM(d18:1/18:0)	3	5.0222	0	0	3.5082	5.5745	11.3255	0	0	3.1788	4.0714	1.53884	2.3159	2.9283	4.7623	0	0	0	1.66775	1.99647	0.815056	0	0	0	0	0	0	0	0	0	6.5891	0	0	0	10.7493	0	2.6941	2.86179	4.26015	1.61018	6.6415	0.6517
	1125	2.5936	255.116	C12H18N2O2S;	H;	3.8022	Thiamylal	3	0	0	0	0	0	0	0	0	0	0	0	0	0	0	0	0	0	0	0	0	0	0	0	0	0	0	0	0	0	0	0	0	0	0	0	0	0	0	0	0	0
	1126	2.5937	830.671				Unidentified	4	0	0	0	2.7083	0	0	0	0	0.338537	0.957529	0.361912	0	0	0	0	0	0	0	0	0	0	0	0	0	0	0	0	0	0	0	0	0	4.2105	0	0	0	0.6015	1.59142	0.6015	3.5631	0
	1127	2.594	819.173				Unidentified	4	0	0.2092	0	0	0	0	0	0	0.02615	0.0739634	0.0279555	2.0294	2.7001	0	0	0	0	0.78825	1.23943	0.505997	1.1898	0	0	0	0.5703	0.4183	0.363067	0.474328	0.193644	0	0	0	0	0	0	0	0	0	0	0	0
	1128	2.5948	728.066	C17H25N5O15P2;	NaCl_HCOONa;	3.65368	Acetyl Adenosine-Diphosphoribose	3	0	0	0	0	0	0	0	0	0	0	0	1.543	0	0	0	0	0	0.257167	0.629927	0.257167	2.4885	0	0	0	0	0	0.41475	1.01593	0.41475	0	0	0	1.1279	0	0	0	0.161129	0.426306	0.161129	0.3271	0
	1129	2.5948	909.956				Unidentified	4	0	0	0.4727	0	3.4581	0	0	0	0.49135	1.21011	0.457377	0	3.5579	0	0	0	0	0.592983	1.45251	0.592983	1.3109	0	0	0	0	0	0.218483	0.535173	0.218483	0	0	0	3.1443	0	0	0	0.449186	1.18843	0.449186	4.5925	0
	1130	2.5952	890.202				Unidentified	4	0	0	0	0	0	0	0	0	0	0	0	0	0	0	0	0	0	0	0	0	0.6608	0	0	0	0	0	0.110133	0.26977	0.110133	0	0	0	4.5564	0	0	0	0.650914	1.72216	0.650914	2.8957	0
	1131	2.5959	779.53	C38H77N2O6P;	Na_HCOONa;	0.5901	Etn-1-P-Cer(d14:1/18:0)	3	0	6.3473	2.9171	8.508	5.6584	8.2164	0	0	3.9559	3.69396	1.39619	0	0	4.841	5.904	12.6113	11.1045	5.74347	5.34271	2.18115	3.4919	0	0	0	0	0	0.581983	1.42556	0.581983	0	0	0	14.1907	4.0651	17.789	13.4607	7.07221	7.80413	2.94968	4.9358	0
	1132	2.596	889.953	C29H20ClN7O11S3;	NaClx2;	1.50573	cibacron blue 3GA; Reactive blue 2	3	0	0	0	0	0	0	0	0	0	0	0	0.7654	0	0	0	0	0	0.127567	0.312473	0.127567	0.2964	0	0	0	0	0	0.0494	0.121005	0.0494	0	0	0	1.1066	0	0	0	0.158086	0.418255	0.158086	0	0
	1133	2.5961	659.632				Unidentified	4	0	0	0	0.4073	0	0	0	0	0.0509125	0.144002	0.0544278	1.2021	0	0	0	0	0	0.20035	0.490755	0.20035	0	0	0	0	0	0	0	0	0	0	0	0	1.9483	0	0	0	0.278329	0.736388	0.278329	0	0
	1134	2.5962	932.782				Unidentified	4	0	0	0	3.744	0	0	0	0	0.468	1.3237	0.500313	6.6348	0	0	0	0	0	1.1058	2.70865	1.1058	0	0	0	0	0	0	0	0	0	0	0	0	0	0	0	0	0	0	0	0	0
	1135	2.5973	659.678				Unidentified	4	0	0	0.1784	3.03	0	0	0	0	0.40105	1.06409	0.402188	3.0317	0	0	0.7559	0	0	0.631267	1.21422	0.495702	0.948	0	0	0	0	0	0.158	0.387019	0.158	0	0	0	0	0	0	0	0	0	0	2.5821	2.3712
	1136	2.5974	991.458	C21H19I4NO10;C63H94O6;C56H96O6;	K;Na_Na;NaCl_HCOONa;	4.59827	Tetraiodothyronine-glucuronoside; Thyroxine glucuronide; TG(60:14); TG(53:6);	3	0	1.5233	0	0	0	0	0	0	0.190413	0.538568	0.20356	0	0	0	0	0	0	0	0	0	0	0	0	0	0	0	0	0	0	0	0	0	13.5168	0	0	0	1.93097	5.10887	1.93097	0	0
	1137	2.5987	260.187	C11H27N3;	NaCl;	3.88182	Ethyl-[(propylamino)propyl]propane-diamine	3	12.2808	12.9595	13.8467	13.8456	12.432	12.3436	0	0	9.71352	6.02728	2.2781	13.9826	13.5328	11.4537	1.1447	0.9797	0	6.84892	6.79207	2.77285	16.1375	13.0599	11.3402	14.2095	0	0	9.12452	7.23808	2.95493	11.2515	9.5319	11.3392	15.1353	11.1043	0	0	8.33746	5.94168	2.24574	15.8634	17.3642
	1138	2.5988	985.983	C29H42N7O18P3S;	HCOOK;	0.486756	Hydroxyphenacyl Coenzyme A; Hydroxyphenylacetyl-CoA; Phenoxyacetyl-CoA	3	0	0	0	0	0	0	0	0	0	0	0	0	0	0	0	0	0	0	0	0	0	0	0	0	0	0	0	0	0	0	0	0	0	0	0	0	0	0	0	2.2176	0
	1139	2.5992	932.746				Unidentified	4	0	0	0.5314	3.744	3.0083	0	0	0	0.910463	1.54542	0.584114	6.6348	0	0	0	0	0	1.1058	2.70865	1.1058	0	0	0	0	0	0	0	0	0	0	0	0	0	0	0	0	0	0	0	5.8159	0
	1140	2.5994	910.326				Unidentified	4	0	0.4348	0.1879	2.4905	0	0	0	0	0.38915	0.863171	0.326248	0	0	0	0	0	0	0	0	0	0	0	0	0	0	0	0	0	0	0	0	0	4.9796	0	0	0	0.711371	1.88211	0.711371	1.8319	0
	1141	2.6003	728.415				Unidentified	4	0	0	0	0	0	0	0	0	0	0	0	0.2933	0	0	0	0	0	0.0488833	0.119739	0.0488833	0.9548	0	0	0	0	0	0.159133	0.389795	0.159133	0	0	0	1.3582	0	0	0	0.194029	0.513351	0.194029	0.5502	0
	1142	2.6011	819.097				Unidentified	4	0	0	0	0.7723	0	0	0	0	0.0965375	0.273049	0.103203	0	0	1.2192	0	0	0	0.2032	0.497736	0.2032	0.7723	0	0	0	0	0	0.128717	0.31529	0.128717	0	0	0	2.4876	0	0	0	0.355371	0.940224	0.355371	0.7303	0
	1143	2.6012	533.201	C25H34O11;C26H38N2O3S;C24H32O9;C28H30N2O3;	Na;KCl;HCOONa;Na_HCOONa;	2.0255	Gibberellin 2-O-beta-D-glucoside; N-(4-benzenesulfonamide) arachidonoyl amine; 16alpha,17beta-Estriol 17-(beta-D-glucuronide); 16alpha,17beta-Estriol 3-(beta-D-glucuronide); 16-Glucuronide-estriol; Estriol-17-glucuroinide; Estriol-3-glucuronide; Rhodamine 6g	3	0	0	0	0	0	0	0	0	0	0	0	0.2159	0	0	0	0	0	0.0359833	0.0881408	0.0359833	2.2831	0	0	0	0	0	0.380517	0.932072	0.380517	0	0	0	0	0	0	0	0	0	0	0	0.3097
	1144	2.6013	779.593				Unidentified	4	6.6982	0	7.708	2.7769	0	8.9801	0	0	3.2704	3.91094	1.4782	5.9672	0	0	0	0	0	0.994533	2.4361	0.994533	3.099	0	0	0	0	0	0.5165	1.26516	0.5165	7.5411	0	0	5.2637	8.498	13.0745	0	4.91104	5.14628	1.94511	2.6728	0
	1145	2.6013	857.431				Unidentified	4	4.1165	0	7.0546	6.2102	6.8597	0	0	0	3.03012	3.35691	1.26879	6.5488	0	0	0	19.9707	0	4.41992	8.05607	3.28888	3.3068	0	0	0	0	0	0.551133	1.35	0.551133	0	0	0	7.8808	0	13.6908	0	3.08166	5.52372	2.08777	5.4791	11.5337
	1146	2.6024	195.122	C8H19O3P;C10H20O;	H;K;	1.3838	Hexylphosphonate Ethyl Ester; Citronellol; Menthol; Neomenthol; Dimethyl-Octenol; Decenol; methyl-nonenol; Citronellol; Decanal	3	0	0	0	0	0	0	0	0	0	0	0	0	0	0	0	0	0	0	0	0	0	0	0	0	0	0	0	0	0	0	0	0	0	0	0	0	0	0	0	0	0
	1147	2.603	830.431	C38H57N7O10;C39H61NO10;	NaCl;NaCl_HCOONa;	4.5401	[(Benzyloxycarbonylamino-Cyclohexyl-Hydroxy-Oxo-Butylamino)-Guanidino-Pentanoylamino]-(Carboxy-Cyclohexyl-Ethylcarbamoyl)-Butyric Acid	3	0	0	0.5438	2.1358	0	0	0	0	0.33495	0.752123	0.284276	1.0954	0	0	0	0	0	0.182567	0.447195	0.182567	1.3079	0	0	0	0	0	0.217983	0.533948	0.217983	0	5.2635	0	6.9595	0	0	0	1.74614	3.02203	1.14222	3.5892	0
	1148	2.6031	985.805				Unidentified	4	0	0	0.4547	1.7963	0	0	0	0	0.281375	0.632464	0.239049	2.7009	0	0	0	0	0	0.45015	1.10264	0.45015	1.5542	0	0	0	0	0	0.259033	0.634499	0.259033	0	0	0	2.022	0	0	0	0.288857	0.764244	0.288857	1.3615	2.7799
	1149	2.6042	952.245	C38H47Br2N9O5;	HCOOK;	0.409588	Olcegepant	3	0	0	0	3.2514	0	0	0	0	0.406425	1.14954	0.434487	4.5494	0	0	0	0	0	0.758233	1.85728	0.758233	1.5703	0	0	0	0	0	0.261717	0.641072	0.261717	0	0	0	3.2734	0	0	0	0.467629	1.23723	0.467629	0	3.7665
	1150	2.6047	712.131				Unidentified	4	0	0	0	0	0	0	0	0	0	0	0	1.5648	0	0	0	0	0	0.2608	0.638827	0.2608	1.2697	0	0	0	0	0	0.211617	0.518353	0.211617	0	0	4.4524	1.8948	0	0	0	0.906743	1.71556	0.64842	4.9146	1.7817
	1151	2.6056	817.494				Unidentified	4	0	0	0	0	0	0	0	0.3157	0.0394625	0.111617	0.0421872	0	0	0	0	0	0	0	0	0	0	0	0	0	0	0	0	0	0	0	0	0	0.919	0	0	0	0.131286	0.347349	0.131286	2.3539	0
	1152	2.6058	789.054				Unidentified	4	0	0	0	1.837	0	0	0	0	0.229625	0.649478	0.245479	1.9652	0	0	0	0	0	0.327533	0.80229	0.327533	1.1324	0	0	0	0	0	0.188733	0.4623	0.188733	0	0	0	2.8468	0	0	0	0.406686	1.07599	0.406686	3.2965	1.2282
	1153	2.6058	804.347	C35H61NO12;	NaClx2;	4.76162	Oleandomycin	3	0	0	0	1.9866	0	0	0	0	0.248325	0.702369	0.265471	0	0	0	0	0	0	0	0	0	0	0	0	0	0	0	0	0	0	0	0	0	0.504	0	0	0	0.072	0.190494	0.072	0.7996	0
	1154	2.6064	817.428	C36H68O17;C40H71O10P;	Na_Na;KCl;	1.11326	Hexadecanyl-glucosyl-glucosyl-xylosyl-sn-glycerol; PG(34:4)	3	0	0.3237	0	0.827	0	0	0	0	0.143838	0.298376	0.112775	1.2103	0	0	0	0	0	0.201717	0.494103	0.201717	0	0	0	0	0	0	0	0	0	0	0	0	3.4437	0	0	0	0.491957	1.3016	0.491957	1.7824	0.7326
	1155	2.6078	714.773				Unidentified	4	0	0	4.8354	0	4.8305	5.5629	0	0	1.9036	2.63686	0.996639	0	3.6537	5.2102	0	0	0	1.47732	2.34098	0.955701	1.8315	0	0	0	0	0	0.30525	0.747707	0.30525	0	0	0	4.0401	0	0	3.2465	1.04094	1.79245	0.677482	0	5.5792
	1156	2.6078	910.095	C25H40N7O17P3S;	KCl;	4.2414	Methylpropenoyl-CoA; Crotonoyl-CoA; Cyclopropanecarboxyl-CoA; methylacrylyl-CoA; Vinylacetyl-CoA	3	0	3.1061	4.6132	3.6924	3.2788	0	0	0	1.83631	2.01202	0.760471	3.9779	3.6863	0	0	0	1.9266	1.59847	1.88646	0.770145	1.7212	0	0	0	0	0	0.286867	0.702677	0.286867	0	0	0	3.4742	0	0	0	0.496314	1.31312	0.496314	0	4.2003
	1157	2.6091	162.057				Unidentified	4	0	0	2.8564	2.6056	0	0	0	0	0.68275	1.26598	0.478497	0	0	0	0	0	0	0	0	0	0	0	0	0	0	0	0	0	0	0	0	0	0	0	0	0	0	0	0	2.5466	0
	1158	2.6092	996.471				Unidentified	4	0	0	0	0.5148	0	0	0	0	0.06435	0.182009	0.068793	1.3593	0	0	0	0	0	0.22655	0.554932	0.22655	0.5568	0	0	0	0	0	0.0928	0.227313	0.0928	0	0	0	0	0	0	0	0	0	0	0	2.9978
	1159	2.6094	817.369	C42H62O11;C44H50N8;	KCl;NaCl_HCOONa;	0.330328	Avermectin A1a monosaccharide; Quadrigemine A	3	0	0.5718	0	0	0	0	0	0	0.071475	0.202162	0.07641	0	0	0	0	0	0	0	0	0	0	0	0	0	0	0	0	0	0	0	0	0	0	0	0	0	0	0	0	2.1052	2.0213
	1160	2.6095	834.957				Unidentified	4	0	0	0	0	0	0	0	0	0	0	0	0	0	0	0	0	0	0	0	0	0	0	0	0	0	0	0	0	0	0	0	0	0	0	0	0	0	0	0	2.237	0
	1161	2.6107	788.974				Unidentified	4	0	0	0	0	0	0	0	0	0	0	0	0	0	0	0	0	0	0	0	0	0	0	0	0	0	0	0	0	0	0	0	0	1.9507	0	0	0	0.278671	0.737295	0.278671	2.7894	0
	1162	2.6129	794.114				Unidentified	4	0	0	0	0.6479	0	0	0	1.2626	0.238812	0.471727	0.178296	0	0	0	0	0	0	0	0	0	1.5613	0	0	0	0	0	0.260217	0.637398	0.260217	0	0	0	0	0	0	0	0	0	0	0	1.5833
	1163	2.6132	817.312	C40H52O15;	Na_Na;	1.41931	Correolide	3	0	0	0	0.7152	0	0	0	0	0.0894	0.252861	0.0955726	0.9537	0	0	0	0	0	0.15895	0.389346	0.15895	0.7416	0	0	0	0	0	0.1236	0.302757	0.1236	0	0	0	1.9828	0	0	0	0.283257	0.749428	0.283257	1.7236	3.6809
	1164	2.6138	845.324				Unidentified	4	0	0	0	2.8212	0	0	0	0	0.35265	0.997445	0.376999	2.5751	3.191	0	0	0	0	0.961017	1.50149	0.612979	0	0	0	0	0	0	0	0	0	0	0	0	2.8676	0	0	0	0.409657	1.08385	0.409657	1.8498	2.1325
	1165	2.6139	817.271	C33H42O19;C34H34N2O16;	KCl;Na_HCOONa;	4.84601	Troxerutin; Gomphrenin-V; Lampranthin II	3	0	0	0	1.7368	0	0	0	0	0.2171	0.614052	0.23209	0.9537	0	0	0.7559	0	0	0.284933	0.445827	0.182008	1.2	0	0	0	0.7605	1.4639	0.570733	0.664371	0.271228	0	0	0	3.8902	0	0	0	0.555743	1.47036	0.555743	1.2521	1.6819
	1166	2.614	156.102	C8H13NO2;C8H10O2;	H;NH3;	3.13897	Arecoline; Bemegride; Heliotridine; Retronecine; Scopoline; 3-Ethylcatechol; 3-Methoxybenzyl alcohol; Hydroxyphenylethanol; Styrene cis-glycol	3	5.4073	4.2238	4.6454	3.1017	3.0908	0	0	0	2.55863	2.25072	0.850693	5.4317	4.4256	0	0	0	0	1.64288	2.56495	1.04714	3.8775	0	0	0	0	0	0.64625	1.58298	0.64625	0	0	0	0	0	0	0	0	0	0	0	3.3989
	1167	2.6149	613.339				Unidentified	4	0	0	0	0	0.54	0	0	0	0.0675	0.190919	0.0721605	0	0	0	0	0	0	0	0	0	0	0	0	0	0	0	0	0	0	0	0	0	0	0	0	0	0	0	0	0.8068	0
	1168	2.6155	809.109	C23H36N4O20P2;	NaCl;	4.80775	UDP-N-acetylmuramoyl-L-alanine	3	0	0	0	0	0	0	0	1.7361	0.217012	0.613804	0.231996	0	0	0	0	0.6287	0	0.104783	0.256666	0.104783	0.4439	0	0	2.0429	0	0.8365	0.553883	0.803679	0.328101	0	0	0	0	0	0	0	0	0	0	0	0
	1169	2.6157	291.103	C19H14O3;C9H18N4O4;C14H20N2;C10H22O2S;	H;Na_Na;KCl;HCOOK;	0.274817	Aurin; Octopine; N2-(Carboxyethyl)arginine; Diethyltryptamine; Octyl-Hydroxyethyl Sulfoxide	3	0	1.3939	1.1443	0	1.549	0	0	0	0.5109	0.713505	0.26968	0	1.0119	0	0	0	0	0.16865	0.413106	0.16865	0	3.7216	0	0	0	0	0.620267	1.51934	0.620267	0	0	0	0	0	0	0	0	0	0	0	0
	1170	2.6159	657.37	C30H62O10;	KCl;	3.83345	Polidocanol	3	0	0	0	0	0	0	0	0	0	0	0	0	0	0	0	0	0	0	0	0	0	0	0	0	0	0	0	0	0	0	0	0	0	0	0	0	0	0	0	1.2814	0
	1171	2.6165	192.079				Unidentified	4	0	0	0	0	0	0	0	0	0	0	0	0	0	0	0	0	0	0	0	0	1.6901	0	0	0	0	0	0.281683	0.68998	0.281683	0	0	0	0	0	0	0	0	0	0	0	0
	1172	2.6173	942.628				Unidentified	4	0	0	0	1.0257	0	0	0	0	0.128213	0.36264	0.137065	3.0539	3.5195	0	0	0	0	1.09557	1.70362	0.6955	0	0	0	0	0	0	0	0	0	0	0	9.8544	3.8846	0	0	0	1.96271	3.76903	1.42456	4.9324	2.0392
	1173	2.618	910.027				Unidentified	4	0	3.1061	0	4.0049	0	0	0	0	0.888875	1.66331	0.628674	0.8954	3.3239	5.0605	0	0	0	1.54663	2.14971	0.877615	0.552	0	0	0	1.3872	0	0.3232	0.566088	0.231104	0	0	5.0369	0	0	0	0	0.719557	1.90377	0.719557	3.1748	4.7625
	1174	2.6187	520.335				Unidentified	4	0	0	0	0.6274	0	0	0	0	0.078425	0.221819	0.0838399	0.2155	0	0	0	0	0	0.0359167	0.0879775	0.0359167	1.1563	0	0	0	0	0	0.192717	0.472057	0.192717	0	0	0	0.7029	0	0	0	0.100414	0.265671	0.100414	0.4061	0.8592
	1175	2.6188	952.743	C51H92NO8P;C46H87NO13;	KCl;Na_HCOONa;	1.3122	PE(46:5); Galabiosylceramide (d18:1/16:0); Lactosylceramide (d18:1/16:0)	3	3.6346	4.6432	0	0	0	0	0	0	1.03472	1.93481	0.731289	6.174	0	0	0	0	7.9189	2.34882	3.68037	1.5025	3.1285	0	0	0	0	0	0.521417	1.2772	0.521417	0	0	0	5.8289	0	16.2696	0	3.15693	6.17674	2.33459	0	0
	1176	2.6192	182.126				Unidentified	4	0	0	0	0	0	0	0	0	0	0	0	0	0	0	0	0	0	0	0	0	0	0	0	0	0	0	0	0	0	0	0	0	0	0	0	0	0	0	0	0	0
	1177	2.6192	726.598	C42H85NO3;	KCl;	0.894586	Cer(d18:0/24:0)	3	0	0	0	0	0	0	0	0	0	0	0	0	0	0	0	0	0	0	0	0	0.6903	0	0	0	2.0913	0	0.4636	0.84386	0.344504	0	0	0	0	0	0	0	0	0	0	0	0
	1178	2.6192	991.369				Unidentified	4	0	0.8964	0	5.7897	0	0	0	0	0.835762	2.02612	0.765802	5.6519	0	0	6.3307	0	0	1.9971	3.10133	1.26611	0	0	0	0	0	0	0	0	0	10.296	0	0	0	6.5331	0	0	2.40416	4.24714	1.60527	0	6.1543
	1179	2.6194	933.073				Unidentified	4	5.1838	3.8477	0.7926	7.2413	0	0	0	0	2.13318	2.88686	1.09113	9.3229	0	0	0	0	0	1.55382	3.80606	1.55382	1.2336	0	0	0	0	0	0.2056	0.503615	0.2056	0	0	0	5.5683	0	0	0	0.795471	2.10462	0.795471	5.3928	7.6504
	1180	2.6204	285.175				Unidentified	4	0	0	0	0	0	0	0	0	0	0	0	0	0	0	0	0	0	0	0	0	0	0	0	0	0	0	0	0	0	0	0	0	0	0	0	0	0	0	0	0	0
	1181	2.6214	830.38				Unidentified	4	0	0	0	0	3.8689	0	0	0	0.483613	1.36786	0.517004	3.5921	0	0	0	0	0	0.598683	1.46647	0.598683	0	0	0	0	0	0	0	0	0	0	0	5.7889	0	0	0	0	0.826986	2.188	0.826986	0	1.1863
	1182	2.6231	564.363	C25H54NO6P;	HCOONa;	3.65014	PC(O-1:0/O-16:0); PC(O-17:0/0:0)	3	0	0	0	1.2845	0	0	0	0	0.160562	0.454139	0.171649	0.6544	0	0	0	0	0	0.109067	0.267158	0.109067	0	0	0	0	0	0	0	0	0	0	0	0	0	0	0	0	0	0	0	0.7707	1.3776
	1183	2.6239	881.291	C40H50O14;	NaCl_HCOONa;	0.748917	Zaragozic acid C	3	0	0	0	0.6232	2.8211	0	0	0	0.430538	0.990244	0.374277	3.2561	3.7338	7.0581	0	0	0	2.34133	2.8799	1.17572	0	0	0	0	0	0	0	0	0	0	0	4.5314	1.0402	0	0	0	0.795943	1.69218	0.639586	7.2502	2.4714
	1184	2.6242	788.862				Unmatched Adduct	4	0	0	0	0	3.2755	0	0	0	0.409438	1.15806	0.437707	0	0	0	0	0	0	0	0	0	0	0	0	0	0	0	0	0	0	0	0	4.6955	1.3323	0	0	0	0.861114	1.7622	0.666049	2.3528	0.8719
	1185	2.625	890.128				Unidentified	4	0	0	0	0	0	0	0	0	0	0	0	0	0	0	0	0	0	0	0	0	0	0	0	0.9981	0	1.2548	0.375483	0.587333	0.239778	2.8564	0	0	0.9766	0	0	0	0.547571	1.0812	0.408654	2.4276	1.4988
	1186	2.6262	845.375				Unidentified	4	0	0	0	0	0	0	0	0	0	0	0	0	0	0	0	0	0	0	0	0	0.8116	0	0	0	0	0	0.135267	0.331334	0.135267	0	0	0	1.7942	0	0	0	0.256314	0.678144	0.256314	0	3.3578
	1187	2.6265	377.049	C15H14O10;C12H17N2O7P;C16H15FN2O2S;C24H14;C12H14N2O4;	Na;Na_Na;NaCl;KCl;NaCl_HCOONa;	1.40565	Caffeoylisocitrate; Pyridoxyl-Amino-Cyclopropanecarboxylic Acid-Monophosphate; Atreleuton; Dibenzo pyrene; Oxohexobarbital	3	3.3722	4.9791	4.3593	0	2.4623	0	0	0	1.89661	2.15315	0.813815	0	1.6568	0	0	0	0	0.276133	0.676386	0.276133	0	0.926	0	0	0	0	0.154333	0.378038	0.154333	0.6532	0.349	0	0	0.9122	0	0	0.273486	0.377937	0.142847	0	0
	1188	2.6273	427.236	C24H36O5;C22H38O5;C23H34O3;C20H38O4;C21H36O3;	Na;Na_Na;HCOONa;HCOOK;Na_HCOONa;	4.75139	Hydroxy-dioxo-cholanoic Acid; Dihydroxy-oxo-cholenoic Acid; Lovastatin; Methyl-PGF2 methyl ester; Dimethyl-PGE1; Dimethyl-PGF2; Dihomo-PGE1; Dihomo-PGF2; Ethyl PGF2; Carboprost methyl; Misoprostol; Octylphenoxy polyethoxyethanol; Hydroxy-dimethylpregnene-dione; Butyl-methoxy-estratriene-diol; Hydroxy-D-homoandrostenone propionate; Hydroxy-methylandrostenone propionate; Pregnenolone acetate; Eicos…	3	0	0	0	0	0	0	0	0	0	0	0	3.738	4.3711	0	0	0	0	1.35152	2.10331	0.858673	0	0	0	0	0	0	0	0	0	0	0	0	0	0	0	0	0	0	0	0	0
	1189	2.6288	942.694				Unidentified	4	0	0	0	0	0	0	0.4335	0	0.0541875	0.153265	0.0579289	2.4743	0	0	0	0.3948	0	0.478183	0.990563	0.404396	0.4918	0	0	0	0	0	0.0819667	0.200777	0.0819667	0	0	0	0	0	0	0	0	0	0	0.7271	0
	1190	2.6305	933.162				Unidentified	4	0	0	0	1.3024	0	0	0	0	0.1628	0.460468	0.174041	2.2579	0	0	0	0	0	0.376317	0.921784	0.376317	0	0	0	0	0	0	0	0	0	0	0	0	0	0	0	0	0	0	0	0	4.7025
	1191	2.6305	986.054				Unidentified	4	0	0	0	0	0	0	0	0	0	0	0	2.3446	0	0	0	0	0	0.390767	0.957179	0.390767	0.5263	0	0	0	0	0	0.0877167	0.214861	0.0877167	0	0	4.9743	0	0	0	0	0.710614	1.88011	0.710614	2.4241	1.315
	1192	2.6314	845.27	C35H44N4O16;	HCOONa;	0.970105	Formylmethanofuran; formyl-methanofuran a	3	0	2.7431	0	0	0	0	0	0	0.342888	0.969832	0.366562	1.7499	0	0	0	0	0	0.29165	0.714394	0.29165	0.3211	0	0	0	0	0	0.0535167	0.131089	0.0535167	0	0	0	0	0	8.5915	0	1.22736	3.24728	1.22736	0	1.3336
	1193	2.6321	910.172				Unidentified	4	0	0	2.7977	1.3421	0	0	0	0	0.517475	1.03414	0.390868	0	0	0	0	0	2.5738	0.428967	1.05075	0.428967	0.6238	0	0	0	0	0	0.103967	0.254665	0.103967	0	0	4.9401	2.2179	0	0	0	1.02257	1.91503	0.723814	2.8857	0
	1194	2.6324	608.391	C32H55BrN4O;	NH3;	0.279426	Thonzonium bromide	3	0	0	0	0.8106	0	0	0	0	0.101325	0.28659	0.108321	0.6746	0	0	0	0	0	0.112433	0.275404	0.112433	0	0	0	0	0	0	0	0	0	0	0	0	1.4938	0	0	0	0.2134	0.564603	0.2134	0	2.0258
	1195	2.633	845.197				Unidentified	4	0	0	2.8208	2.3972	0	0	0	0	0.65225	1.21303	0.458481	1.7642	0	4.4505	0	0	0	1.03578	1.81561	0.741221	0	0	0	0	0	0	0	0	0	0	0	4.8239	3.2176	0	0	7.7559	2.25677	3.1125	1.17641	3.2385	0
	1196	2.6331	135.028	C6H6N4;	H;	3.84997	Deazaadenine; 6-Methylpurine; Dihydropteridine	3	0	0	0	0	0	0	0	0	0	0	0	0	0	0	0	0	0	0	0	0	5.0362	0	0	0	0	0	0.839367	2.05602	0.839367	0	0	0	0	0	0	0	0	0	0	0	0
	1197	2.6339	942.503	C47H78NO8P;	NaCl_HCOONa;	0.318303	PE(42:8)	3	2.8555	0	0	1.1251	0	0	0	0	0.497575	1.03089	0.389638	4.3751	2.7202	0	0	7.4546	0	2.42498	3.06035	1.24938	0.575	0	0	0	0	0	0.0958333	0.234743	0.0958333	4.2539	12.3301	0	11.5477	0	0	0	4.01881	5.63354	2.12928	2.402	4.161
	1198	2.634	932.832				Unidentified	4	0	0	0	0	0	0	0	0	0	0	0	2.7814	5.3776	0	0	0	0	1.35983	2.26097	0.923036	1.3475	0	0	0	0	0	0.224583	0.550115	0.224583	0	0	0	16.8095	0	0	0	2.40136	6.35339	2.40136	3.1857	0
	1199	2.6354	890.27	C39H49NO21;	Na;	0.662721	Anthemis glycoside A	3	0	0	0	0	0	0	0	0	0	0	0	0	0	0	0	0	0	0	0	0	0	0	0	0	0	0	0	0	0	0	0	0	1.3524	0	0	0	0.1932	0.511159	0.1932	0.7693	3.0605
[truncated: 661 more rows]
[truncated: 192 more columns]

## Sheet: Sheet1
No match found	Matching found but drift exceeded thresholds
[truncated: 73 more rows]
